# Supplementary material for: The BRCAness Landscape of Cancer
Source: MDPI journal article supplement (doi:10.3390/cells11233877), 2022-12-01
Supplement: s1 [file s1]

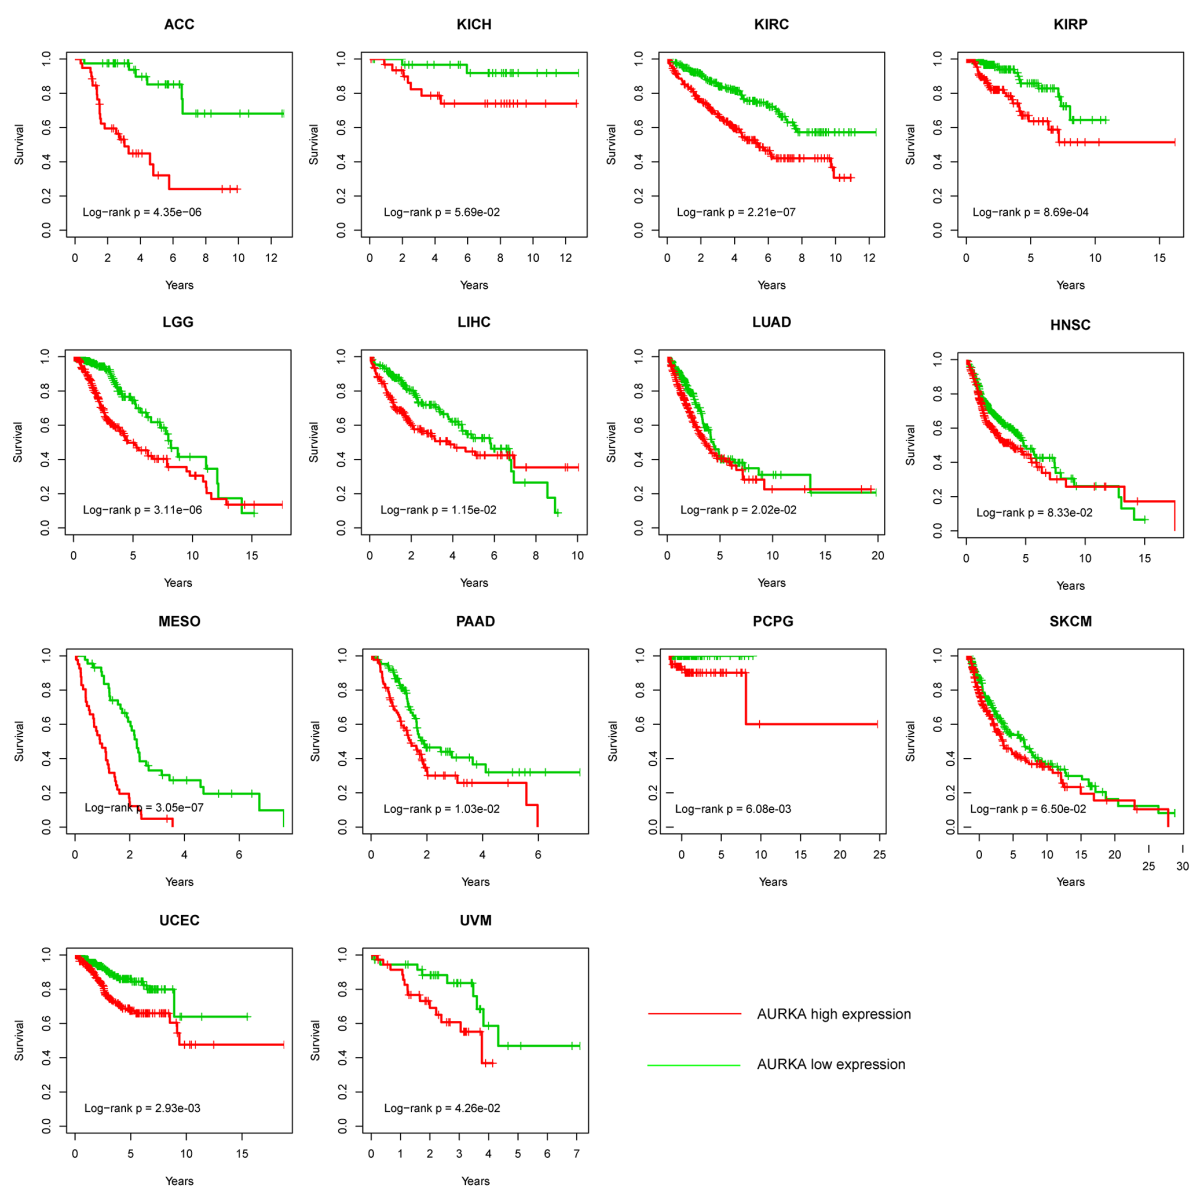

**Figure S1.** Kaplan-Meier survival plots of patients grouped by the expression levels of *AURKA* in 14 cancer types. P-values by log-rank test are shown in each cancer type.
