# Supplementary material for: The BRCAness Landscape of Cancer
Source: Cells. 2022 Dec 1;11(23):3877. doi: 10.3390/cells11233877 (PMC9738094; doi:10.3390/cells11233877)
Supplement: Supplementary file 1 [file cells-11-03877-s001.zip › Table S1.xlsx]

## Sheet: Sheet 1
Table S1. Cancer types and genomic data from TCGA project
Number	Cancer type	Abbr.	PLP	CNV	RNA_Seq (normal)	RNA_Seq (cancer)	DNA_methylation (normal)	DNA_methylation (cancer)
1	Adrenocortical Carcinoma	ACC	92	90	0	79	0	79
2	Bladder Urothelial Carcinoma	BLCA	411	385	19	408	21	413
3	Breast Invasive Carcinoma	BRCA	1026	949	113	1102	87	783
4	Cervical Squamous Cell Carcinoma and Endocervical Adenocarcinoma	CESC	291	296	3	306	3	308
5	Cholangiocarcinoma	CHOL	36	33	9	36	9	36
6	Colon Adenocarcinoma	COAD	405	372	41	451	34	288
7	Lymphoid Neoplasm Diffuse Large B-cell Lymphoma	DLBC	37	45	0	48	0	48
8	Esophageal Carcinoma	ESCA	185	170	11	185	15	184
9	Glioblastoma Multiforme	GBM	400	570	0	166	1	150
10	Head and Neck Squamous Carcinoma	HNSC	509	492	44	522	50	525
11	Kidney Chromophobe	KICH	66	37	25	66	0	65
12	Kidney Renal Clear Cell Carcinoma	KIRC	370	412	72	534	157	313
13	Kidney Renal Papillary Cell Carcinoma	KIRP	282	167	32	291	43	272
14	Acute Myeloid Leukemia	LAML	140	99	0	173	0	194
15	Brain Lower Grade Glioma	LGG	525	350	0	529	0	527
16	Liver Hepatocellular Carcinoma	LIHC	365	360	50	373	50	376
17	Lung Adenocarcinoma	LUAD	517	493	59	517	30	458
18	Lung Squamous Cell Carcinoma	LUSC	485	407	51	501	41	364
19	Mesothelioma	MESO	82	61	0	87	0	87
20	Ovarian Serous Cystadenocarcinoma	OV	411	494	0	308	0	10
21	Pancreatic Adenocarcinoma	PAAD	178	141	4	179	10	184
22	Pheochromocytoma and Paraganglioma	PCPG	184	158	3	184	3	183
23	Prostate Adenocarcinoma	PRAD	498	479	52	498	50	496
24	Rectum Adenocarcinoma	READ	146	154	10	160	7	93
25	Sarcoma	SARC	239	248	2	263	4	261
26	Skin Cutaneous Melanoma	SKCM	468	395	1	472	2	473
27	Stomach Adenocarcinoma	STAD	439	407	35	415	2	393
28	Testicular Germ Cell Tumors	TGCT	134	138	0	139	0	138
29	Thyroid Carcinoma	THCA	500	418	59	513	56	511
30	Thymoma	THYM	123	103	2	120	2	124
31	Uterine Corpus Endometrial Carcinoma	UCEC	531	469	22	533	33	419
32	Uterine Carcinosarcoma	UCS	57	53	0	57	0	57
33	Uveal Melanoma	UVM	80	79	0	80	0	80
Total			10212	9524	719	10295	710	8892
