# Supplementary material for: The BRCAness Landscape of Cancer
Source: Cells. 2022 Dec 1;11(23):3877. doi: 10.3390/cells11233877 (PMC9738094; doi:10.3390/cells11233877)
Supplement: Supplementary file 1 [file cells-11-03877-s001.zip › Table S2.xlsx]

## Sheet: Sheet1
Table S2: Pathogenic variants in 33 cancer types
Gene	Cancer_type																																	Total	Rate (%)
	UCEC	BLCA	LUSC	HNSC	STAD	COAD	BRCA	SKCM	LGG	LUAD	GBM	CESC	ESCA	LIHC	READ	PAAD	SARC	PRAD	UCS	KIRC	OV	KIRP	KICH	MESO	THCA	DLBC	ACC	THYM	CHOL	UVM	PCPG	TGCT	LAML
Somatic variants by refering to COSMIC database
TP53	156	188	304	316	173	160	210	71	268	208	98	23	134	70	70	82	65	43	49	10	39	5	23	13	1	5	10	3	3	0	1	1	0	2802	39.8124
PTEN	328	17	36	11	17	18	28	32	20	5	80	33	2	5	8	0	7	7	14	9	0	6	3	2	2	1	0	0	0	0	0	0	0	691	9.81813
ATM	90	60	18	14	37	45	13	22	2	23	2	8	1	10	12	8	6	12	1	7	1	4	1	0	4	0	1	0	0	0	0	0	0	402	5.71185
KMT2A	68	49	21	20	33	32	12	51	3	20	4	11	4	7	0	3	3	6	0	3	1	4	0	0	6	1	0	0	0	0	0	0	0	362	5.14351
CHD4	112	32	9	12	34	31	27	33	3	9	3	14	1	6	3	2	1	6	5	1	0	2	1	0	1	1	0	0	0	0	0	0	0	349	4.9588
ATR	47	32	12	21	17	14	10	35	3	9	7	11	0	11	3	2	2	2	1	0	0	2	1	0	2	2	0	0	0	0	0	0	0	246	3.49531
CDK12	23	26	12	5	16	22	10	18	3	7	3	15	2	2	6	0	3	8	0	3	0	1	0	0	1	1	0	0	1	0	0	0	0	188	2.67121
TP53BP1	21	15	4	11	11	16	7	26	3	3	2	11	0	1	3	0	1	4	0	2	0	3	0	0	2	0	0	0	0	0	0	0	0	146	2.07445
BAP1	19	19	3	1	12	6	5	8	0	6	1	7	0	12	1	2	0	0	0	23	0	7	0	6	0	0	0	0	1	3	0	0	0	142	2.01762
BRCA2	35	19	9	6	8	15	6	6	0	8	3	5	1	5	3	0	0	2	0	2	0	1	0	0	1	0	0	0	0	0	0	0	0	135	1.91816
RAD50	41	11	5	10	7	9	4	12	4	7	1	4	0	3	4	0	2	1	0	1	0	1	0	0	0	0	0	0	0	0	0	0	0	127	1.80449
FANCD2	26	14	5	6	7	7	9	15	3	1	4	4	0	3	0	1	1	2	0	0	0	0	1	0	0	2	0	0	0	0	0	0	0	111	1.57715
BRIP1	22	13	1	10	3	10	3	10	0	5	2	8	0	1	3	0	0	2	0	3	0	0	0	0	0	0	0	0	0	0	0	0	0	96	1.36402
FANCI	22	10	4	9	6	6	6	12	0	4	1	4	0	2	2	0	2	1	0	2	0	0	0	0	1	0	0	0	0	0	0	0	0	94	1.33561
PARP1	16	12	2	3	10	4	7	11	1	2	4	2	0	1	1	1	0	2	0	1	0	1	0	0	0	0	0	0	0	0	0	0	0	81	1.1509
PAXIP1	19	6	4	3	5	10	5	6	2	5	0	5	1	1	2	0	2	0	0	0	0	4	0	0	1	0	0	0	0	0	0	0	0	81	1.1509
CHEK2	16	10	5	2	6	6	7	4	3	4	0	4	0	1	0	1	2	0	0	1	0	2	0	0	4	0	1	0	0	0	0	0	0	79	1.12248
PLK1	19	4	3	2	15	11	0	9	1	5	1	1	1	1	2	0	0	1	0	0	0	1	0	0	0	1	0	0	0	0	0	0	0	78	1.10827
BLM	11	12	3	3	5	7	8	7	1	2	3	4	0	3	1	0	0	0	0	1	0	0	0	0	0	0	0	0	0	0	0	0	0	71	1.00881
WRN	16	4	4	3	8	6	3	13	1	3	2	1	0	3	2	1	0	0	0	0	0	0	0	0	1	0	0	0	0	0	0	0	0	71	1.00881
SAMHD1	13	1	4	5	8	8	2	14	0	3	1	1	0	2	1	2	3	1	0	2	0	0	0	0	0	0	0	0	0	0	0	0	0	71	1.00881
BRCA1	8	10	9	5	4	0	7	6	0	5	1	5	0	1	0	1	0	0	0	1	1	0	0	0	0	1	0	0	0	0	0	0	0	65	0.923558
MYC	15	3	3	6	5	7	1	8	0	3	0	3	0	0	0	0	2	1	2	0	0	0	0	1	0	3	0	0	0	0	0	0	0	63	0.895141
FANCA	10	8	4	4	6	4	3	6	0	2	1	4	1	2	0	0	0	0	0	0	0	0	0	0	0	0	0	0	0	0	0	0	0	55	0.781472
WEE1	15	9	5	1	4	2	5	5	0	1	0	0	0	3	1	0	0	1	1	0	0	0	1	0	0	0	0	0	0	0	0	0	0	54	0.767263
CHEK1	11	4	8	1	6	3	1	2	2	5	2	1	0	3	1	0	1	0	0	0	0	1	0	0	0	0	0	0	0	0	0	0	0	52	0.738846
NBN	13	5	0	2	3	2	1	2	1	2	0	2	0	0	4	0	0	1	0	0	0	2	0	0	0	0	0	0	0	0	0	0	0	40	0.568343
BARD1	7	5	4	2	4	0	0	3	1	3	0	0	0	2	0	1	1	2	0	1	0	0	0	0	0	0	0	0	0	0	1	0	0	37	0.525717
FANCC	12	5	0	2	4	3	0	4	1	0	0	0	0	0	1	1	1	0	0	0	0	0	0	0	0	0	0	0	0	0	0	0	0	34	0.483092
PALB2	9	4	4	1	3	0	2	6	0	1	0	1	0	1	0	0	0	0	0	0	0	1	0	0	0	1	0	0	0	0	0	0	0	34	0.483092
RAD51	6	8	3	1	3	0	1	2	0	1	0	2	0	2	0	0	0	1	0	1	0	0	0	0	0	0	0	0	0	0	0	0	0	31	0.440466
RAD51B	8	4	3	0	1	3	1	3	0	3	1	1	0	1	0	0	0	1	0	0	0	1	0	0	0	0	0	0	0	0	0	0	0	31	0.440466
RAD51C	5	5	2	3	0	0	4	6	0	2	1	2	0	0	0	0	0	0	0	1	0	0	0	0	0	0	0	0	0	0	0	0	0	31	0.440466
ERCC1	6	1	1	0	3	1	1	3	0	0	1	0	0	0	0	1	0	0	0	1	0	0	0	0	0	0	1	0	0	0	0	1	0	21	0.29838
AURKA	5	2	1	0	1	0	0	1	0	0	2	3	0	1	1	1	0	0	0	0	0	0	0	0	0	0	0	0	0	0	0	0	0	18	0.255754
RAD51D	1	1	3	1	1	3	1	0	0	2	0	0	0	1	0	0	0	0	0	0	0	0	0	0	0	0	0	0	0	0	0	0	0	14	0.19892
FANCF	2	3	5	0	1	0	0	1	0	0	0	0	0	0	0	0	0	1	0	0	0	0	0	0	0	0	0	0	0	0	0	0	0	13	0.184712
FANCE	3	0	1	0	1	2	1	1	0	1	0	0	0	1	0	0	0	0	0	1	0	0	0	0	0	0	0	0	0	0	0	0	0	12	0.170503
RAD52	5	0	1	1	0	0	0	1	0	1	0	0	0	0	0	0	0	1	0	0	0	0	0	0	0	0	0	0	0	0	0	0	0	10	0.142086
Subtotal	1261	631	525	503	488	473	411	475	326	371	231	200	148	168	135	110	105	109	73	77	42	49	31	22	27	19	13	3	5	3	2	2	0	7038	100
Germline variants by refering to ClinVar database
TP53	127	133	229	248	147	129	171	45	204	143	72	14	121	51	61	68	56	36	38	10	34	5	16	10	1	5	10	2	3	0	1	1	0	2191	69.2697
PTEN	277	9	26	8	26	17	23	15	11	2	49	19	2	3	6	0	2	9	9	8	0	0	1	1	1	1	0	0	0	0	0	0	0	525	16.5982
ATM	33	12	3	0	18	17	3	2	0	8	2	3	0	0	4	1	1	0	1	2	0	3	0	0	0	0	1	0	0	0	0	0	0	114	3.60417
BRCA2	14	9	5	2	15	8	6	3	0	1	1	5	2	1	2	2	1	1	0	0	0	0	0	0	0	0	0	0	0	0	0	0	0	78	2.46601
BRCA1	10	5	3	0	2	1	8	1	0	3	1	2	0	0	1	0	0	0	0	0	3	0	0	0	0	0	0	0	0	0	0	0	0	40	1.26462
KMT2A	5	4	0	2	5	6	2	3	0	1	0	0	1	2	0	0	1	1	0	0	0	0	0	0	0	0	1	0	0	0	0	0	0	34	1.07493
BAP1	1	0	0	1	0	0	3	0	0	1	0	3	0	2	0	0	0	0	0	5	0	0	0	2	0	0	0	0	0	3	0	0	0	21	0.663927
PALB2	2	1	3	0	7	0	1	2	0	0	0	0	0	0	0	0	0	0	0	1	0	0	0	0	0	0	0	0	0	0	0	0	0	17	0.537464
RAD50	8	1	0	1	2	2	0	0	1	0	0	0	1	0	0	0	1	0	0	0	0	0	0	0	0	0	0	0	0	0	0	0	0	17	0.537464
WRN	9	0	0	1	3	1	1	2	0	0	0	0	0	0	0	0	0	0	0	0	0	0	0	0	0	0	0	0	0	0	0	0	0	17	0.537464
BRIP1	3	1	0	1	1	2	0	4	0	0	0	1	0	0	1	0	0	1	0	0	0	0	0	0	0	0	0	0	0	0	0	0	0	15	0.474233
FANCA	4	1	0	0	1	3	0	0	0	1	0	0	1	0	0	0	0	0	0	0	0	0	0	0	0	0	0	0	0	0	0	0	0	11	0.347771
NBN	5	1	0	0	1	1	0	0	0	0	0	2	0	0	1	0	0	0	0	0	0	0	0	0	0	0	0	0	0	0	0	0	0	11	0.347771
CHEK2	4	0	0	0	3	1	1	0	0	0	0	0	0	0	0	0	0	0	0	0	0	0	0	0	0	0	1	1	0	0	0	0	0	11	0.347771
BLM	2	0	1	0	4	3	0	0	0	0	0	0	0	0	0	0	0	0	0	0	0	0	0	0	0	0	0	0	0	0	0	0	0	10	0.316156
BARD1	4	0	1	0	2	0	0	0	0	0	0	1	0	0	0	0	0	0	0	0	0	0	0	0	0	0	0	0	0	0	0	0	0	8	0.252924
FANCC	3	0	2	0	1	0	0	0	0	0	0	0	0	0	0	0	1	0	0	0	0	0	0	0	0	0	0	0	0	0	1	0	0	8	0.252924
CHD4	4	0	0	0	0	1	0	0	0	1	1	0	0	0	0	0	0	0	0	0	0	0	0	0	0	0	0	0	0	0	0	0	0	7	0.221309
MYC	2	0	0	0	0	0	0	0	0	0	0	0	0	0	0	0	0	0	1	0	0	0	0	0	0	2	0	0	0	0	0	0	0	5	0.158078
RAD51C	2	0	0	0	0	0	0	1	0	2	0	0	0	0	0	0	0	0	0	0	0	0	0	0	0	0	0	0	0	0	0	0	0	5	0.158078
SAMHD1	2	0	0	0	0	0	0	2	0	0	0	0	0	0	0	1	0	0	0	0	0	0	0	0	0	0	0	0	0	0	0	0	0	5	0.158078
FANCI	0	0	0	0	1	0	0	1	0	1	0	0	0	0	0	0	0	0	0	0	0	0	0	0	0	0	0	1	0	0	0	0	0	4	0.126462
FANCE	2	0	0	0	0	1	0	0	0	0	0	0	1	0	0	0	0	0	0	0	0	0	0	0	0	0	0	0	0	0	0	0	0	4	0.126462
ATR	3	0	0	0	0	0	0	0	0	0	0	0	0	0	0	0	0	0	0	0	0	0	0	0	0	0	0	0	0	0	0	0	0	3	0.0948467
ERCC1	0	0	0	0	0	0	0	0	0	0	0	0	0	0	0	0	0	0	0	0	0	0	0	0	0	0	0	1	0	0	0	0	0	1	0.0316156
RAD51	0	0	0	0	0	0	0	0	0	0	0	0	0	0	0	0	0	0	0	0	0	0	0	1	0	0	0	0	0	0	0	0	0	1	0.0316156
Subtotal	526	177	273	264	239	193	219	81	216	164	126	50	129	59	76	72	63	48	49	26	37	8	17	14	2	8	13	5	3	3	2	1	0	3163	100
Total	1787	808	798	767	727	666	630	556	542	535	357	250	277	227	211	182	168	157	122	103	79	57	48	36	29	27	26	8	8	6	4	3	0	10201	100
