# Supplementary material for: The BRCAness Landscape of Cancer
Source: Cells. 2022 Dec 1;11(23):3877. doi: 10.3390/cells11233877 (PMC9738094; doi:10.3390/cells11233877)
Supplement: Supplementary file 1 [file cells-11-03877-s001.zip › Table S4.xlsx]

## Sheet: Sheet1
Table S4: Germline pathogenic variants in TCGA matched in ClinVar database
TCGA information									ClinVar information
Gene	Chr.	Start	End	Tumor_Seq_Allele1	Tumor_Seq_Allele2	Sample_Barcode	Norm_Sample_Barcode		Chr.	Start	Stop	Ref.	Alt.	Name	Clinical Significance	OriginSimple
BRCA1	17	41256906	41256906	G	A	TCGA-18-3421-01A-01D-0983-08	LUSC		17	41256906	41256906	G	A	NM_007294.4(BRCA1):c.280C>T (p.Gln94Ter)	Pathogenic	germline
BRCA1	17	41244451	41244451	C	A	TCGA-19-5956-01A-11D-1696-08	GBM		17	41244451	41244451	C	A	NM_007294.4(BRCA1):c.3097G>T (p.Glu1033Ter)	Pathogenic	germline
BRCA1	17	41203135	41203135	C	A	TCGA-36-2534-01A-01D-1526-09	OV		17	41203135	41203135	C	A	NM_007294.4(BRCA1):c.5278-1G>T	Pathogenic	germline
BRCA1	17	41276113	41276113	T	C	TCGA-42-2591-01A-01D-1526-09	OV		17	41276113	41276113	T	C	NM_007294.4(BRCA1):c.1A>G (p.Met1Val)	Pathogenic	germline
BRCA1	17	41215391	41215391	C	T	TCGA-43-5668-01A-01D-1632-08	LUSC		17	41215391	41215391	C	T	NM_007294.4(BRCA1):c.5153-1G>A	Pathogenic	germline
BRCA1	17	41244118	41244118	G	A	TCGA-44-4112-01A-31D-A27T-08	LUAD		17	41244118	41244118	G	A	NM_007294.4(BRCA1):c.3430C>T (p.Gln1144Ter)	Pathogenic	germline
BRCA1	17	41245945	41245945	C	A	TCGA-44-8117-01A-11D-2238-08	LUAD		17	41245945	41245945	C	A	NM_007294.4(BRCA1):c.1603G>T (p.Gly535Ter)	Pathogenic	unknown
BRCA1	17	41243908	41243908	C	A	TCGA-55-8620-01A-11D-2393-08	LUAD		17	41243908	41243908	C	A	NM_007294.4(BRCA1):c.3640G>T (p.Glu1214Ter)	Pathogenic	germline
BRCA1	17	41244748	41244748	G	A	TCGA-A1-A0SH-01A-11D-A099-09	BRCA		17	41244748	41244748	G	A	NM_007294.4(BRCA1):c.2800C>T (p.Gln934Ter)	Pathogenic	germline
BRCA1	17	41276033	41276033	C	T	TCGA-A1-A0SO-01A-22D-A099-09	BRCA		17	41276033	41276033	C	T	NM_007294.4(BRCA1):c.80+1G>A	Pathogenic/Likely pathogenic	germline
BRCA1	17	41245390	41245390	C	A	TCGA-A2-A25B-01A-11D-A167-09	BRCA		17	41245390	41245390	C	A	NM_007294.4(BRCA1):c.2158G>T (p.Glu720Ter)	Pathogenic	germline
BRCA1	17	41226515	41226515	G	T	TCGA-AA-3984-01A-02D-1981-10	COAD		17	41226515	41226515	G	T	NM_007294.4(BRCA1):c.4508C>A (p.Ser1503Ter)	Pathogenic	germline
BRCA1	17	41258551	41258551	C	A	TCGA-AJ-A3EL-01A-11D-A20S-09	UCEC		17	41258551	41258551	C	A	NM_007294.4(BRCA1):c.135-1G>T	Pathogenic	germline
BRCA1	17	41245390	41245390	C	A	TCGA-AJ-A5DW-01A-11D-A27P-09	UCEC		17	41245390	41245390	C	A	NM_007294.4(BRCA1):c.2158G>T (p.Glu720Ter)	Pathogenic	germline
BRCA1	17	41201181	41201181	C	A	TCGA-AN-A0XU-01A-11D-A10G-09	BRCA		17	41201181	41201181	C	A	NM_007294.4(BRCA1):c.5363G>T (p.Gly1788Val)	Pathogenic	germline
BRCA1	17	41245351	41245351	C	A	TCGA-AP-A0LM-01A-11D-A122-09	UCEC		17	41245351	41245351	C	A	NM_007294.4(BRCA1):c.2197G>T (p.Glu733Ter)	Pathogenic	germline
BRCA1	17	41245531	41245531	C	A	TCGA-AX-A0J0-01A-11D-A117-09	UCEC		17	41245531	41245531	C	A	NM_007294.4(BRCA1):c.2017G>T (p.Glu673Ter)	Pathogenic	germline
BRCA1	17	41245834	41245834	C	A	TCGA-AX-A2HC-01A-11D-A17D-09	UCEC		17	41245834	41245834	C	A	NM_007294.4(BRCA1):c.1714G>T (p.Glu572Ter)	Pathogenic	germline
BRCA1	17	41234451	41234451	G	A	TCGA-B5-A11E-01A-11D-A10M-09	UCEC		17	41234451	41234451	G	A	NM_007294.4(BRCA1):c.4327C>T (p.Arg1443Ter)	Pathogenic	germline
BRCA1	17	41223256	41223256	C	T	TCGA-BH-A0WA-01A-11D-A10G-09	BRCA		17	41223256	41223256	C	T	NM_007294.4(BRCA1):c.4676-1G>A	Pathogenic	germline
BRCA1	17	41201212	41201212	C	A	TCGA-BS-A0UF-01A-11D-A10B-09	UCEC		17	41201212	41201212	C	A	NM_007294.4(BRCA1):c.5333-1G>T	Pathogenic	germline/somatic
BRCA1	17	41215378	41215378	G	A	TCGA-C5-A1BI-01B-11D-A13W-08	CESC		17	41215378	41215378	G	A	NM_007294.4(BRCA1):c.5165C>T (p.Ser1722Phe)	Pathogenic/Likely pathogenic	germline
BRCA1	17	41219625	41219625	C	T	TCGA-CG-4443-01A-01D-1158-08	STAD		17	41219625	41219625	C	T	NM_007294.4(BRCA1):c.5074G>A (p.Asp1692Asn)	Pathogenic/Likely pathogenic	germline
BRCA1	17	41256279	41256279	C	G	TCGA-DF-A2KR-01A-11D-A17W-09	UCEC		17	41256279	41256279	C	G	NM_007294.4(BRCA1):c.302-1G>C	Pathogenic	germline
BRCA1	17	41245834	41245834	C	A	TCGA-F5-6814-01A-31D-1924-10	READ		17	41245834	41245834	C	A	NM_007294.4(BRCA1):c.1714G>T (p.Glu572Ter)	Pathogenic	germline
BRCA1	17	41243707	41243707	G	A	TCGA-G2-A2EL-01A-12D-A18F-08	BLCA		17	41243707	41243707	G	A	NM_007294.4(BRCA1):c.3841C>T (p.Gln1281Ter)	Pathogenic	germline
BRCA1	17	41242998	41242998	G	C	TCGA-G2-AA3B-01A-11D-A391-08	BLCA		17	41242998	41242998	G	C	NM_007294.4(BRCA1):c.4148C>G (p.Ser1383Ter)	Pathogenic	germline
BRCA1	17	41209095	41209095	G	A	TCGA-HU-8243-01A-11D-2340-08	STAD		17	41209095	41209095	G	A	NM_007294.4(BRCA1):c.5251C>T (p.Arg1751Ter)	Pathogenic	germline
BRCA1	17	41234556	41234556	G	A	TCGA-LL-A8F5-01A-11D-A36J-09	BRCA		17	41234556	41234556	G	A	NM_007294.4(BRCA1):c.4222C>T (p.Gln1408Ter)	Pathogenic	germline
BRCA1	17	41244538	41244538	C	A	TCGA-PQ-A6FN-01A-11D-A31L-08	BLCA		17	41244538	41244538	C	A	NM_007294.4(BRCA1):c.3010G>T (p.Glu1004Ter)	Pathogenic	germline
BRCA1	17	41243830	41243830	G	A	TCGA-VS-A9UP-01A-11D-A42O-09	CESC		17	41243830	41243830	G	A	NM_007294.4(BRCA1):c.3718C>T (p.Gln1240Ter)	Pathogenic	germline
BRCA1	17	41215352	41215352	C	A	TCGA-XF-AAMX-01A-11D-A42E-08	BLCA		17	41215352	41215352	C	A	NM_007294.4(BRCA1):c.5191G>T (p.Glu1731Ter)	Pathogenic	germline
BRCA1	17	41245549	41245549	G	A	TCGA-ZF-AA4W-01A-12D-A38G-08	BLCA		17	41245549	41245549	G	A	NM_007294.4(BRCA1):c.1999C>T (p.Gln667Ter)	Pathogenic	germline
BRCA2	13	32907110	32907110	C	T	TCGA-22-4595-01A-01D-1267-08	LUSC		13	32907110	32907110	C	T	NM_000059.4(BRCA2):c.1495C>T (p.Gln499Ter)	Pathogenic/Likely pathogenic	germline
BRCA2	13	32911788	32911788	C	G	TCGA-33-A5GW-01A-11D-A27K-08	LUSC		13	32911788	32911788	C	G	NM_000059.4(BRCA2):c.3296C>G (p.Ser1099Ter)	Pathogenic	germline
BRCA2	13	32910968	32910968	G	T	TCGA-4Z-AA7W-01A-11D-A391-08	BLCA		13	32910968	32910968	G	T	NM_000059.4(BRCA2):c.2476G>T (p.Glu826Ter)	Pathogenic	germline
BRCA2	13	32900288	32900288	G	T	TCGA-77-7337-01A-21D-2042-08	LUSC		13	32900288	32900288	G	T	NM_000059.4(BRCA2):c.475+1G>T	Pathogenic	germline
BRCA2	13	32905062	32905062	A	T	TCGA-94-7033-01A-11D-1945-08	LUSC		13	32905062	32905062	A	T	NM_000059.4(BRCA2):c.688A>T (p.Lys230Ter)	Pathogenic	germline
BRCA2	13	32911850	32911850	G	T	TCGA-97-8172-01A-11D-2284-08	LUAD		13	32911850	32911850	G	T	NM_000059.4(BRCA2):c.3358G>T (p.Glu1120Ter)	Pathogenic	germline
BRCA2	13	32972574	32972574	C	G	TCGA-A2-A0SU-01A-11D-A099-09	BRCA		13	32972574	32972574	C	G	NM_000059.4(BRCA2):c.9924C>G (p.Tyr3308Ter)	Pathogenic	germline
BRCA2	13	32953476	32953476	T	G	TCGA-A2-A0T0-01A-22D-A099-09	BRCA		13	32953476	32953476	T	G	NM_000059.4(BRCA2):c.8777T>G (p.Leu2926Ter)	Pathogenic	germline
BRCA2	13	32932056	32932056	G	T	TCGA-AA-3510-01A-01D-1408-10	COAD		13	32932056	32932056	G	T	NM_000059.4(BRCA2):c.7795G>T (p.Glu2599Ter)	Pathogenic	germline
BRCA2	13	32953924	32953924	T	G	TCGA-AA-A010-01A-01D-A17O-10	COAD		13	32953924	32953924	T	G	NM_000059.4(BRCA2):c.8991T>G (p.Tyr2997Ter)	Pathogenic	germline
BRCA2	13	32914137	32914137	C	A	TCGA-AP-A0LL-01A-12D-A127-09	UCEC		13	32914137	32914137	C	A	NM_000059.4(BRCA2):c.5645C>A (p.Ser1882Ter)	Pathogenic	germline
BRCA2	13	32911085	32911085	G	T	TCGA-AP-A1E0-01A-11D-A135-09	UCEC		13	32911085	32911085	G	T	NM_000059.4(BRCA2):c.2593G>T (p.Glu865Ter)	Pathogenic	germline
BRCA2	13	32912813	32912813	G	T	TCGA-AX-A2HD-01A-21D-A17D-09	UCEC		13	32912813	32912813	G	T	NM_000059.4(BRCA2):c.4321G>T (p.Glu1441Ter)	Likely pathogenic	germline
BRCA2	13	32911683	32911683	C	A	TCGA-BS-A0UF-01A-11D-A10B-09	UCEC		13	32911683	32911683	C	A	NM_000059.4(BRCA2):c.3191C>A (p.Ser1064Ter)	Pathogenic	germline
BRCA2	13	32912813	32912813	G	T	TCGA-BS-A0UV-01A-11D-A10B-09	UCEC		13	32912813	32912813	G	T	NM_000059.4(BRCA2):c.4321G>T (p.Glu1441Ter)	Likely pathogenic	germline
BRCA2	13	32936817	32936817	C	T	TCGA-BT-A42C-01A-11D-A23M-08	BLCA		13	32936817	32936817	C	T	NM_000059.4(BRCA2):c.7963C>T (p.Gln2655Ter)	Pathogenic	germline
BRCA2	13	32937530	32937530	C	T	TCGA-BT-A42C-01A-11D-A23M-08	BLCA		13	32937530	32937530	C	T	NM_000059.4(BRCA2):c.8191C>T (p.Gln2731Ter)	Pathogenic	germline
BRCA2	13	32937315	32937315	G	A	TCGA-C5-A7CK-01A-11D-A32I-09	CESC		13	32937315	32937315	G	A	NM_000059.4(BRCA2):c.7977-1G>A	Pathogenic	germline
BRCA2	13	32893435	32893435	G	T	TCGA-CA-6717-01A-11D-1835-10	COAD		13	32893435	32893435	G	T	NM_000059.4(BRCA2):c.289G>T (p.Glu97Ter)	Pathogenic	germline
BRCA2	13	32914961	32914961	C	T	TCGA-CF-A1HR-01A-11D-A13W-08	BLCA		13	32914961	32914961	C	T	NM_000059.4(BRCA2):c.6469C>T (p.Gln2157Ter)	Pathogenic	germline
BRCA2	13	32907143	32907143	G	T	TCGA-CM-4752-01A-01D-1408-10	COAD		13	32907143	32907143	G	T	NM_000059.4(BRCA2):c.1528G>T (p.Glu510Ter)	Pathogenic	germline
BRCA2	13	32914877	32914877	G	T	TCGA-DK-A6AW-01A-11D-A30E-08	BLCA		13	32914877	32914877	G	T	NM_000059.4(BRCA2):c.6385G>T (p.Glu2129Ter)	Pathogenic	germline/somatic
BRCA2	13	32893373	32893373	C	G	TCGA-DK-A6B5-01A-11D-A31L-08	BLCA		13	32893373	32893373	C	G	NM_000059.4(BRCA2):c.227C>G (p.Ser76Ter)	Pathogenic	germline
BRCA2	13	32910968	32910968	G	T	TCGA-DS-A1OC-01A-11D-A14W-08	CESC		13	32910968	32910968	G	T	NM_000059.4(BRCA2):c.2476G>T (p.Glu826Ter)	Pathogenic	germline
BRCA2	13	32945213	32945213	C	T	TCGA-EE-A2GO-06A-11D-A196-08	SKCM		13	32945213	32945213	C	T	NM_000059.4(BRCA2):c.8608C>T (p.Gln2870Ter)	Pathogenic	germline
BRCA2	13	32972342	32972342	C	A	TCGA-EI-6513-01A-21D-1733-10	READ		13	32972342	32972342	C	A	NM_000059.4(BRCA2):c.9692C>A (p.Ser3231Ter)	Pathogenic	germline
BRCA2	13	32920978	32920978	C	T	TCGA-EO-A22X-01A-11D-A17W-09	UCEC		13	32920978	32920978	C	T	NM_000059.4(BRCA2):c.6952C>T (p.Arg2318Ter)	Pathogenic	germline/somatic
BRCA2	13	32954009	32954009	C	T	TCGA-ER-A194-01A-11D-A197-08	SKCM		13	32954009	32954009	C	T	NM_000059.4(BRCA2):c.9076C>T (p.Gln3026Ter)	Pathogenic	germline
BRCA2	13	32893435	32893435	G	T	TCGA-EY-A1GI-01A-11D-A13L-09	UCEC		13	32893435	32893435	G	T	NM_000059.4(BRCA2):c.289G>T (p.Glu97Ter)	Pathogenic	germline
BRCA2	13	32937348	32937348	C	T	TCGA-F5-6814-01A-31D-1924-10	READ		13	32937348	32937348	C	T	NM_000059.4(BRCA2):c.8009C>T (p.Ser2670Leu)	Pathogenic/Likely pathogenic	germline
BRCA2	13	32914137	32914137	C	G	TCGA-FD-A6TC-01A-21D-A339-08	BLCA		13	32914137	32914137	C	G	NM_000059.4(BRCA2):c.5645C>G (p.Ser1882Ter)	Pathogenic	germline
BRCA2	13	32937516	32937516	A	G	TCGA-FV-A2QR-01A-11D-A20W-10	LIHC		13	32937516	32937516	A	G	NM_000059.4(BRCA2):c.8177A>G (p.Tyr2726Cys)	Pathogenic/Likely pathogenic	germline
BRCA2	13	32914967	32914967	C	T	TCGA-IR-A3LA-01A-11D-A22X-09	CESC		13	32914967	32914967	C	T	NM_000059.4(BRCA2):c.6475C>T (p.Gln2159Ter)	Pathogenic	germline
BRCA2	13	32906495	32906495	G	T	TCGA-JY-A6FA-01A-11D-A33E-09	ESCA		13	32906495	32906495	G	T	NM_000059.4(BRCA2):c.880G>T (p.Glu294Ter)	Pathogenic	germline
BRCA2	13	32945213	32945213	C	T	TCGA-K4-A3WS-01A-11D-A22Z-08	BLCA		13	32945213	32945213	C	T	NM_000059.4(BRCA2):c.8608C>T (p.Gln2870Ter)	Pathogenic	germline
BRCA2	13	32972342	32972342	C	A	TCGA-LP-A4AW-01A-11D-A243-09	CESC		13	32972342	32972342	C	A	NM_000059.4(BRCA2):c.9692C>A (p.Ser3231Ter)	Pathogenic	germline
BRCA2	13	32937584	32937584	C	T	TCGA-T2-A6X2-01A-12D-A34J-08	HNSC		13	32937584	32937584	C	T	NM_000059.4(BRCA2):c.8245C>T (p.Gln2749Ter)	Pathogenic	germline
BRCA2	13	32906495	32906495	G	T	TCGA-VS-A9UV-01A-11D-A42O-09	CESC		13	32906495	32906495	G	T	NM_000059.4(BRCA2):c.880G>T (p.Glu294Ter)	Pathogenic	germline
BRCA2	13	32913176	32913176	C	T	TCGA-YD-A9TA-06A-11D-A397-08	SKCM		13	32913176	32913176	C	T	NM_000059.4(BRCA2):c.4684C>T (p.Gln1562Ter)	Pathogenic	germline
BAP1	3	52437782	52437782	G	C	TCGA-97-A4LX-01A-11D-A24P-08	LUAD		3	52437782	52437782	G	C	NM_004656.4(BAP1):c.1379C>G (p.Ser460Ter)	Pathogenic	germline
BAP1	3	52443880	52443880	C	T	TCGA-AX-A2HG-01A-11D-A17D-09	UCEC		3	52443880	52443880	C	T	NM_004656.4(BAP1):c.15G>A (p.Trp5Ter)	Pathogenic	germline
BAP1	3	52439913	52439913	G	A	TCGA-B0-5092-01A-01D-1421-08	KIRC		3	52439913	52439913	G	A	NM_004656.4(BAP1):c.799C>T (p.Gln267Ter)	Pathogenic	germline
BAP1	3	52440295	52440295	G	A	TCGA-B0-5092-01A-01D-1421-08	KIRC		3	52440295	52440295	G	A	NM_004656.4(BAP1):c.757C>T (p.Gln253Ter)	Pathogenic	germline
BAP1	3	52437782	52437782	G	C	TCGA-B0-5095-01A-01D-1421-08	KIRC		3	52437782	52437782	G	C	NM_004656.4(BAP1):c.1379C>G (p.Ser460Ter)	Pathogenic	germline
BAP1	3	52436624	52436624	G	A	TCGA-B8-A54G-01A-11D-A25V-10	KIRC		3	52436624	52436624	G	A	NM_004656.4(BAP1):c.2050C>T (p.Gln684Ter)	Pathogenic	germline
BAP1	3	52437782	52437782	G	C	TCGA-C5-A1BM-01A-11D-A13W-08	CESC		3	52437782	52437782	G	C	NM_004656.4(BAP1):c.1379C>G (p.Ser460Ter)	Pathogenic	germline
BAP1	3	52443574	52443574	G	A	TCGA-CJ-4638-01A-02D-1386-10	KIRC		3	52443574	52443574	G	A	NM_004656.4(BAP1):c.118C>T (p.Gln40Ter)	Pathogenic	germline
BAP1	3	52440295	52440295	G	A	TCGA-DD-A118-01A-11D-A12Z-10	LIHC		3	52440295	52440295	G	A	NM_004656.4(BAP1):c.757C>T (p.Gln253Ter)	Pathogenic	germline
BAP1	3	52442072	52442072	T	C	TCGA-E2-A573-01A-11D-A29N-09	BRCA		3	52442072	52442072	T	C	NM_004656.4(BAP1):c.277A>G (p.Thr93Ala)	Pathogenic	germline
BAP1	3	52438545	52438545	G	A	TCGA-LK-A4O2-01A-11D-A34C-32	MESO		3	52438545	52438545	G	A	NM_004656.4(BAP1):c.1174C>T (p.Gln392Ter)	Pathogenic	germline
BAP1	3	52437782	52437782	G	C	TCGA-MA-AA41-01A-11D-A387-09	CESC		3	52437782	52437782	G	C	NM_004656.4(BAP1):c.1379C>G (p.Ser460Ter)	Pathogenic	germline
BAP1	3	52440394	52440394	T	C	TCGA-UD-AAC4-01A-11D-A39R-32	MESO		3	52440394	52440394	T	C	NM_004656.4(BAP1):c.660-2A>G	Likely pathogenic	germline
BAP1	3	52437840	52437840	G	A	TCGA-V4-A9EU-01A-11D-A39W-08	UVM		3	52437840	52437840	G	A	NM_004656.4(BAP1):c.1321C>T (p.Gln441Ter)	Pathogenic	germline
BAP1	3	52443574	52443574	G	A	TCGA-V4-A9EX-01A-11D-A39W-08	UVM		3	52443574	52443574	G	A	NM_004656.4(BAP1):c.118C>T (p.Gln40Ter)	Pathogenic	germline
BAP1	3	52443574	52443574	G	A	TCGA-VS-A9UM-01A-11D-A42O-09	CESC		3	52443574	52443574	G	A	NM_004656.4(BAP1):c.118C>T (p.Gln40Ter)	Pathogenic	germline
BARD1	2	215609884	215609884	C	G	TCGA-63-7022-01A-11D-1945-08	LUSC		2	215609884	215609884	C	G	NM_000465.4(BARD1):c.1811-1G>C	Likely pathogenic	germline
BARD1	2	215617280	215617280	C	T	TCGA-BK-A6W3-01A-12D-A34Q-09	UCEC		2	215617280	215617280	C	T	NM_000465.4(BARD1):c.1569-1G>A	Likely pathogenic	germline
BARD1	2	215646072	215646072	G	A	TCGA-JW-A5VL-01A-11D-A28B-09	CESC		2	215646072	215646072	G	A	NM_000465.4(BARD1):c.526C>T (p.Gln176Ter)	Pathogenic	germline
BLM	15	91312667	91312667	G	A	TCGA-D5-6534-01A-21D-1924-10	COAD		15	91312667	91312667	G	A	NM_000057.4(BLM):c.2407-1G>A	Likely pathogenic	unknown
BLM	15	91328183	91328183	C	T	TCGA-F4-6463-01A-11D-1719-10	COAD		15	91328183	91328183	C	T	NM_000057.4(BLM):c.2695C>T (p.Arg899Ter)	Pathogenic/Likely pathogenic	germline
BLM	15	91333930	91333930	C	T	TCGA-HU-A4GU-01A-11D-A25D-08	STAD		15	91333930	91333930	C	T	NM_000057.4(BLM):c.2875C>T (p.Arg959Ter)	Pathogenic	germline
BLM	15	91308549	91308549	C	T	TCGA-NC-A5HM-01A-12D-A26M-08	LUSC		15	91308549	91308549	C	T	NM_000057.4(BLM):c.2098C>T (p.Gln700Ter)	Pathogenic	germline
BLM	15	91346807	91346807	C	T	TCGA-WS-AB45-01A-11D-A40P-10	COAD		15	91346807	91346807	C	T	NM_000057.4(BLM):c.3415C>T (p.Arg1139Ter)	Pathogenic	germline
BRIP1	17	59878685	59878685	C	A	TCGA-AZ-4315-01A-01D-1408-10	COAD		17	59878685	59878685	C	A	NM_032043.3(BRIP1):c.1069G>T (p.Glu357Ter)	Pathogenic	germline
BRIP1	17	59761240	59761240	G	C	TCGA-BT-A42E-01A-11D-A23U-08	BLCA		17	59761240	59761240	G	C	NM_032043.3(BRIP1):c.3167C>G (p.Ser1056Ter)	Likely pathogenic	germline
BRIP1	17	59938806	59938806	A	G	TCGA-D1-A17Q-01A-11D-A12J-09	UCEC		17	59938806	59938806	A	G	NM_032043.3(BRIP1):c.93+2T>C	Likely pathogenic	germline
BRIP1	17	59871088	59871088	C	T	TCGA-D3-A8GB-06A-11D-A372-08	SKCM		17	59871088	59871088	C	T	NM_032043.3(BRIP1):c.1343G>A (p.Trp448Ter)	Pathogenic/Likely pathogenic	germline
BRIP1	17	59858200	59858200	C	T	TCGA-D3-A8GL-06A-11D-A372-08	SKCM		17	59858200	59858200	C	T	NM_032043.3(BRIP1):c.1794+1G>A	Likely pathogenic	germline
BRIP1	17	59886067	59886067	G	A	TCGA-DT-5265-01A-21D-1826-10	READ		17	59886067	59886067	G	A	NM_032043.3(BRIP1):c.679C>T (p.Gln227Ter)	Pathogenic	germline
BRIP1	17	59938828	59938828	G	A	TCGA-E6-A2P9-01A-11D-A19Y-09	UCEC		17	59938828	59938828	G	A	NM_032043.3(BRIP1):c.73C>T (p.Gln25Ter)	Pathogenic	germline
BRIP1	17	59876486	59876486	G	A	TCGA-EA-A410-01A-11D-A243-09	CESC		17	59876486	59876486	G	A	NM_032043.3(BRIP1):c.1315C>T (p.Arg439Ter)	Pathogenic	germline
BRIP1	17	59770874	59770874	C	T	TCGA-EE-A2MD-06A-11D-A197-08	SKCM		17	59770874	59770874	C	T	NM_032043.3(BRIP1):c.2493-1G>A	Pathogenic/Likely pathogenic	germline
BRIP1	17	59770874	59770874	C	G	TCGA-F7-A61V-01A-11D-A28R-08	HNSC		17	59770874	59770874	C	G	NM_032043.3(BRIP1):c.2493-1G>C	Likely pathogenic	germline
BRIP1	17	59853806	59853806	G	A	TCGA-FW-A3R5-06A-11D-A23B-08	SKCM		17	59853806	59853806	G	A	NM_032043.3(BRIP1):c.2053C>T (p.Gln685Ter)	Pathogenic/Likely pathogenic	germline
BRIP1	17	59858254	59858254	G	A	TCGA-VN-A88K-01A-11D-A34U-08	PRAD		17	59858254	59858254	G	A	NM_032043.3(BRIP1):c.1741C>T (p.Arg581Ter)	Pathogenic/Likely pathogenic	germline
ERCC1	19	45924558	45924558	G	A	TCGA-YT-A95F-01A-11D-A428-09	THYM		19	45924558	45924558	G	A	NM_001983.4(ERCC1):c.199C>T (p.Gln67Ter)	Likely pathogenic	germline
FANCA	16	89828358	89828358	G	A	TCGA-55-8506-01A-11D-2393-08	LUAD		16	89828358	89828358	G	A	NM_000135.4(FANCA):c.2851C>T (p.Arg951Trp)	Pathogenic	germline
FANCA	16	89816214	89816214	G	A	TCGA-A5-A1OF-01A-11D-A14G-09	UCEC		16	89816214	89816214	G	A	NM_000135.4(FANCA):c.3163C>T (p.Arg1055Trp)	Pathogenic/Likely pathogenic	germline
FANCA	16	89838223	89838223	C	A	TCGA-AA-3506-01A-01D-2188-10	COAD		16	89838223	89838223	C	A	NM_000135.4(FANCA):c.2015-1G>T	Pathogenic	germline
FANCA	16	89831327	89831327	G	A	TCGA-AP-A0LM-01A-11D-A122-09	UCEC		16	89831327	89831327	G	A	NM_000135.4(FANCA):c.2749C>T (p.Arg917Ter)	Pathogenic	germline
FANCA	16	89828358	89828358	G	A	TCGA-AZ-4615-01A-01D-1408-10	COAD		16	89828358	89828358	G	A	NM_000135.4(FANCA):c.2851C>T (p.Arg951Trp)	Pathogenic	germline
FANCA	16	89857867	89857867	G	A	TCGA-EO-A3KX-01A-11D-A228-09	UCEC		16	89857867	89857867	G	A	NM_000135.4(FANCA):c.1303C>T (p.Arg435Cys)	Pathogenic/Likely pathogenic	germline
FANCA	16	89816138	89816138	C	A	TCGA-L5-A8NS-01A-12D-A37C-09	ESCA		16	89816138	89816138	C	A	NM_000135.4(FANCA):c.3239G>T (p.Arg1080Leu)	Pathogenic	germline
FANCA	16	89857867	89857867	G	A	TCGA-YC-A8S6-01A-31D-A38G-08	BLCA		16	89857867	89857867	G	A	NM_000135.4(FANCA):c.1303C>T (p.Arg435Cys)	Pathogenic/Likely pathogenic	germline
FANCC	9	97873833	97873833	G	T	TCGA-52-7809-01A-21D-2122-08	LUSC		9	97873833	97873833	G	T	NM_000136.3(FANCC):c.1241C>A (p.Ser414Ter)	Likely pathogenic	unknown
FANCC	9	97864038	97864038	G	T	TCGA-85-8481-01A-11D-2323-08	LUSC		9	97864038	97864038	G	T	NM_000136.3(FANCC):c.1628C>A (p.Ser543Ter)	Pathogenic/Likely pathogenic	germline
FANCC	9	97933362	97933362	G	A	TCGA-A5-A0G1-01A-11D-A122-09	UCEC		9	97933362	97933362	G	A	NM_000136.3(FANCC):c.520C>T (p.Arg174Ter)	Pathogenic/Likely pathogenic	germline
FANCC	9	97869347	97869347	C	A	TCGA-DX-AB2W-01A-11D-A38Z-09	SARC		9	97869347	97869347	C	A	NM_000136.3(FANCC):c.1533+1G>T	Pathogenic/Likely pathogenic	germline
FANCC	9	97933362	97933362	G	A	TCGA-HF-7132-01A-11D-2053-08	STAD		9	97933362	97933362	G	A	NM_000136.3(FANCC):c.520C>T (p.Arg174Ter)	Pathogenic/Likely pathogenic	germline
FANCC	9	97864024	97864024	G	A	TCGA-RW-A68D-01A-11D-A35D-08	PCPG		9	97864024	97864024	G	A	NM_000136.3(FANCC):c.1642C>T (p.Arg548Ter)	Pathogenic/Likely pathogenic	germline
FANCI	15	89828432	89828432	C	T	TCGA-CG-4460-01A-01D-1158-08	STAD		15	89828432	89828432	C	T	NM_001113378.2(FANCI):c.1804C>T (p.Arg602Ter)	Likely pathogenic	germline
FANCI	15	89833462	89833462	C	T	TCGA-NJ-A4YQ-01A-11D-A25L-08	LUAD		15	89833462	89833462	C	T	NM_001113378.2(FANCI):c.1840C>T (p.Arg614Ter)	Pathogenic	germline
FANCI	15	89826380	89826380	C	T	TCGA-W3-A825-06A-11D-A34U-08	SKCM		15	89826380	89826380	C	T	NM_001113378.2(FANCI):c.1597C>T (p.Arg533Ter)	Pathogenic	germline
FANCI	15	89858550	89858550	G	A	TCGA-ZB-A966-01A-11D-A428-09	THYM		15	89858550	89858550	G	A	NM_001113378.2(FANCI):c.3854G>A (p.Arg1285Gln)	Pathogenic	germline
MYC	8	128750639	128750639	C	T	TCGA-BG-A220-01A-11D-A159-09	UCEC		8	128750639	128750639	C	T	NM_002467.6(MYC):c.176C>T (p.Ala59Val)	Likely pathogenic	somatic
MYC	8	128750639	128750639	C	T	TCGA-E6-A2P8-01A-11D-A19Y-09	UCEC		8	128750639	128750639	C	T	NM_002467.6(MYC):c.176C>T (p.Ala59Val)	Likely pathogenic	somatic
MYC	8	128750625	128750625	G	C	TCGA-FF-8046-01A-11D-2210-10	DLBC		8	128750625	128750625	G	C	NM_002467.6(MYC):c.162G>C (p.Glu54Asp)	Pathogenic	somatic
MYC	8	128751241	128751241	C	G	TCGA-FF-8046-01A-11D-2210-10	DLBC		8	128751241	128751241	C	G	NM_002467.6(MYC):c.778C>G (p.Pro260Ala)	Likely pathogenic	somatic
MYC	8	128750639	128750639	C	T	TCGA-N7-A4Y0-01A-12D-A28R-08	UCS		8	128750639	128750639	C	T	NM_002467.6(MYC):c.176C>T (p.Ala59Val)	Likely pathogenic	somatic
NBN	8	90967655	90967655	G	T	TCGA-D1-A103-01A-11D-A10M-09	UCEC		8	90967655	90967655	G	T	NM_002485.5(NBN):c.1253C>A (p.Ser418Ter)	Pathogenic	germline
NBN	8	90967566	90967566	G	A	TCGA-DK-A2I4-01A-11D-A21A-08	BLCA		8	90967566	90967566	G	A	NM_002485.5(NBN):c.1342C>T (p.Gln448Ter)	Pathogenic	germline
NBN	8	90955596	90955596	T	C	TCGA-EA-A410-01A-11D-A243-09	CESC		8	90955596	90955596	T	C	NM_002485.5(NBN):c.2071-2A>G	Likely pathogenic	germline
NBN	8	90967761	90967761	C	A	TCGA-F5-6814-01A-31D-1924-10	READ		8	90967761	90967761	C	A	NM_002485.5(NBN):c.1147G>T (p.Glu383Ter)	Pathogenic	germline
PALB2	16	23641503	23641503	C	A	TCGA-33-4587-01A-11D-2122-08	LUSC		16	23641503	23641503	C	A	NM_024675.4(PALB2):c.1972G>T (p.Glu658Ter)	Pathogenic	germline
PALB2	16	23637655	23637655	C	A	TCGA-37-4132-01A-01D-1352-08	LUSC		16	23637655	23637655	C	A	NM_024675.4(PALB2):c.2650G>T (p.Glu884Ter)	Pathogenic	germline
PALB2	16	23614905	23614905	G	A	TCGA-BH-A203-01A-12D-A167-09	BRCA		16	23614905	23614905	G	A	NM_024675.4(PALB2):c.3436C>T (p.Gln1146Ter)	Pathogenic	germline
PALB2	16	23625360	23625360	G	A	TCGA-EE-A2MD-06A-11D-A197-08	SKCM		16	23625360	23625360	G	A	NM_024675.4(PALB2):c.3166C>T (p.Gln1056Ter)	Pathogenic	germline
PALB2	16	23641638	23641638	G	A	TCGA-FD-A5BX-01A-11D-A26M-08	BLCA		16	23641638	23641638	G	A	NM_024675.4(PALB2):c.1837C>T (p.Gln613Ter)	Likely pathogenic	germline
PALB2	16	23646214	23646214	A	C	TCGA-MM-A563-01A-11D-A25V-10	KIRC		16	23646214	23646214	A	C	NM_024675.4(PALB2):c.1653T>G (p.Tyr551Ter)	Pathogenic	germline
PALB2	16	23646192	23646192	G	A	TCGA-W3-AA1V-06B-11D-A401-08	SKCM		16	23646192	23646192	G	A	NM_024675.4(PALB2):c.1675C>T (p.Gln559Ter)	Pathogenic	germline
PTEN	10	89717672	89717672	C	T	TCGA-02-2470-01A-01D-1494-08	GBM		10	89717672	89717672	C	T	NM_000314.8(PTEN):c.697C>T (p.Arg233Ter)	Pathogenic	germline/somatic
PTEN	10	89692922	89692922	T	C	TCGA-06-0155-01B-01D-1492-08	GBM		10	89692922	89692922	T	C	NM_000314.8(PTEN):c.406T>C (p.Cys136Arg)	Pathogenic	germline/somatic
PTEN	10	89692911	89692911	G	A	TCGA-06-0187-01A-01D-1491-08	GBM		10	89692911	89692911	G	A	NM_000314.8(PTEN):c.395G>A (p.Gly132Asp)	Likely pathogenic	germline
PTEN	10	89720794	89720794	T	A	TCGA-06-0192-01B-01D-1492-08	GBM		10	89720794	89720794	T	A	NM_000314.8(PTEN):c.945T>A (p.Tyr315Ter)	Pathogenic	germline
PTEN	10	89720852	89720852	C	T	TCGA-06-0213-01A-01D-1491-08	GBM		10	89720852	89720852	C	T	NM_000314.8(PTEN):c.1003C>T (p.Arg335Ter)	Pathogenic	germline/somatic
PTEN	10	89717672	89717672	C	T	TCGA-06-0650-01A-02D-1696-08	GBM		10	89717672	89717672	C	T	NM_000314.8(PTEN):c.697C>T (p.Arg233Ter)	Pathogenic	germline/somatic
PTEN	10	89692785	89692785	T	C	TCGA-06-0743-01A-01D-1492-08	GBM		10	89692785	89692785	T	C	NM_000314.8(PTEN):c.269T>C (p.Phe90Ser)	Pathogenic/Likely pathogenic	germline
PTEN	10	89717712	89717712	C	T	TCGA-06-0875-01A-01D-1492-08	GBM		10	89717712	89717712	C	T	NM_000314.8(PTEN):c.737C>T (p.Pro246Leu)	Pathogenic	germline
PTEN	10	89692830	89692830	G	A	TCGA-06-0881-01A-02D-1492-08	GBM		10	89692830	89692830	G	A	NM_000314.8(PTEN):c.314G>A (p.Cys105Tyr)	Likely pathogenic	germline
PTEN	10	89711900	89711900	G	A	TCGA-06-0882-01A-01D-1492-08	GBM		10	89711900	89711900	G	A	NM_000314.8(PTEN):c.518G>A (p.Arg173His)	Pathogenic/Likely pathogenic	germline/somatic
PTEN	10	89653833	89653833	G	A	TCGA-06-1804-01A-01D-1696-08	GBM		10	89653833	89653833	G	A	NM_000314.8(PTEN):c.131G>A (p.Gly44Asp)	Pathogenic	germline
PTEN	10	89692904	89692904	C	T	TCGA-06-2558-01A-01D-1494-08	GBM		10	89692904	89692904	C	T	NM_000314.8(PTEN):c.388C>T (p.Arg130Ter)	Pathogenic	germline/somatic
PTEN	10	89692993	89692993	G	T	TCGA-06-2559-01A-01D-1494-08	GBM		10	89692993	89692993	G	T	NM_000314.8(PTEN):c.477G>T (p.Arg159Ser)	Likely pathogenic	germline/somatic
PTEN	10	89692818	89692818	T	C	TCGA-06-2565-01A-01D-1494-08	GBM		10	89692818	89692818	T	C	NM_000314.8(PTEN):c.302T>C (p.Ile101Thr)	Pathogenic/Likely pathogenic	germline
PTEN	10	89692904	89692904	C	T	TCGA-06-5411-01A-01D-1696-08	GBM		10	89692904	89692904	C	T	NM_000314.8(PTEN):c.388C>T (p.Arg130Ter)	Pathogenic	germline/somatic
PTEN	10	89717672	89717672	C	T	TCGA-06-5858-01A-01D-1696-08	GBM		10	89717672	89717672	C	T	NM_000314.8(PTEN):c.697C>T (p.Arg233Ter)	Pathogenic	germline/somatic
PTEN	10	89725042	89725042	A	G	TCGA-12-3649-01A-01D-1495-08	GBM		10	89725042	89725042	A	G	NM_000314.8(PTEN):c.1027-2A>G	Pathogenic/Likely pathogenic	germline
PTEN	10	89692883	89692883	C	T	TCGA-14-0813-01A-01D-1492-08	GBM		10	89692883	89692883	C	T	NM_000314.8(PTEN):c.367C>T (p.His123Tyr)	Pathogenic/Likely pathogenic	germline
PTEN	10	89692911	89692911	G	A	TCGA-16-0848-01A-01D-1492-08	GBM		10	89692911	89692911	G	A	NM_000314.8(PTEN):c.395G>A (p.Gly132Asp)	Likely pathogenic	germline
PTEN	10	89720852	89720852	C	T	TCGA-16-1045-01B-01D-1492-08	GBM		10	89720852	89720852	C	T	NM_000314.8(PTEN):c.1003C>T (p.Arg335Ter)	Pathogenic	germline/somatic
PTEN	10	89692911	89692911	G	A	TCGA-19-5952-01A-11D-1696-08	GBM		10	89692911	89692911	G	A	NM_000314.8(PTEN):c.395G>A (p.Gly132Asp)	Likely pathogenic	germline
PTEN	10	89692905	89692905	G	A	TCGA-19-5956-01A-11D-1696-08	GBM		10	89692905	89692905	G	A	NM_000314.7(PTEN):c.389G>A (p.Arg130Gln)	Pathogenic	germline/somatic
PTEN	10	89720744	89720744	G	T	TCGA-19-5956-01A-11D-1696-08	GBM		10	89720744	89720744	G	T	NM_000314.8(PTEN):c.895G>T (p.Glu299Ter)	Pathogenic	germline
PTEN	10	89692905	89692905	G	A	TCGA-21-5783-01A-41D-2184-08	LUSC		10	89692905	89692905	G	A	NM_000314.7(PTEN):c.389G>A (p.Arg130Gln)	Pathogenic	germline/somatic
PTEN	10	89720808	89720808	T	A	TCGA-22-5489-01A-01D-1632-08	LUSC		10	89720808	89720808	T	A	NM_000314.8(PTEN):c.959T>A (p.Leu320Ter)	Pathogenic	germline
PTEN	10	89720650	89720650	G	A	TCGA-26-5132-01A-01D-1486-08	GBM		10	89720650	89720650	G	A	NM_000314.8(PTEN):c.802-1G>A	Pathogenic/Likely pathogenic	germline
PTEN	10	89711899	89711899	C	T	TCGA-27-2519-01A-01D-1494-08	GBM		10	89711899	89711899	C	T	NM_000314.8(PTEN):c.517C>T (p.Arg173Cys)	Pathogenic	germline/somatic
PTEN	10	89692904	89692904	C	T	TCGA-27-2524-01A-01D-1494-08	GBM		10	89692904	89692904	C	T	NM_000314.8(PTEN):c.388C>T (p.Arg130Ter)	Pathogenic	germline/somatic
PTEN	10	89692923	89692923	G	A	TCGA-27-2526-01A-01D-1494-08	GBM		10	89692923	89692923	G	A	NM_000314.8(PTEN):c.407G>A (p.Cys136Tyr)	Pathogenic	germline
PTEN	10	89693009	89693009	G	T	TCGA-28-2513-01A-01D-1494-08	GBM		10	89693009	89693009	G	T	NM_000314.8(PTEN):c.492+1G>T	Likely pathogenic	germline
PTEN	10	89685269	89685269	G	A	TCGA-2W-A8YY-01A-11D-A37N-09	CESC		10	89685269	89685269	G	A	NM_000314.8(PTEN):c.165-1G>A	Likely pathogenic	germline
PTEN	10	89711899	89711899	C	T	TCGA-2W-A8YY-01A-11D-A37N-09	CESC		10	89711899	89711899	C	T	NM_000314.8(PTEN):c.517C>T (p.Arg173Cys)	Pathogenic	germline/somatic
PTEN	10	89717712	89717712	C	T	TCGA-2W-A8YY-01A-11D-A37N-09	CESC		10	89717712	89717712	C	T	NM_000314.8(PTEN):c.737C>T (p.Pro246Leu)	Pathogenic	germline
PTEN	10	89717712	89717712	C	T	TCGA-32-2616-01A-01D-1495-08	GBM		10	89717712	89717712	C	T	NM_000314.8(PTEN):c.737C>T (p.Pro246Leu)	Pathogenic	germline
PTEN	10	89692902	89692902	G	A	TCGA-32-5222-01A-01D-1486-08	GBM		10	89692902	89692902	G	A	NM_000314.8(PTEN):c.386G>A (p.Gly129Glu)	Pathogenic	germline
PTEN	10	89717708	89717708	C	T	TCGA-34-2605-01A-01D-1522-08	LUSC		10	89717708	89717708	C	T	NM_000314.8(PTEN):c.733C>T (p.Gln245Ter)	Pathogenic	germline
PTEN	10	89692902	89692902	G	A	TCGA-39-5024-01A-21D-1817-08	LUSC		10	89692902	89692902	G	A	NM_000314.8(PTEN):c.386G>A (p.Gly129Glu)	Pathogenic	germline
PTEN	10	89717672	89717672	C	T	TCGA-41-2571-01A-01D-1495-08	GBM		10	89717672	89717672	C	T	NM_000314.8(PTEN):c.697C>T (p.Arg233Ter)	Pathogenic	germline/somatic
PTEN	10	89692800	89692800	C	T	TCGA-41-2573-01A-01D-1495-08	GBM		10	89692800	89692800	C	T	NM_000314.8(PTEN):c.284C>T (p.Pro95Leu)	Pathogenic	germline
PTEN	10	89692905	89692905	G	A	TCGA-41-3915-01A-01D-1353-08	GBM		10	89692905	89692905	G	A	NM_000314.7(PTEN):c.389G>A (p.Arg130Gln)	Pathogenic	germline/somatic
PTEN	10	89711893	89711893	C	A	TCGA-43-2578-01A-01D-1522-08	LUSC		10	89711893	89711893	C	A	NM_000314.8(PTEN):c.511C>A (p.Gln171Lys)	Pathogenic	germline
PTEN	10	89717708	89717708	C	T	TCGA-43-3920-01A-01D-0983-08	LUSC		10	89717708	89717708	C	T	NM_000314.8(PTEN):c.733C>T (p.Gln245Ter)	Pathogenic	germline
PTEN	10	89717708	89717708	C	T	TCGA-4E-A92E-01A-11D-A37N-09	UCEC		10	89717708	89717708	C	T	NM_000314.8(PTEN):c.733C>T (p.Gln245Ter)	Pathogenic	germline
PTEN	10	89685281	89685281	C	G	TCGA-56-5897-01A-11D-1632-08	LUSC		10	89685281	89685281	C	G	NM_000314.8(PTEN):c.176C>G (p.Ser59Ter)	Pathogenic	germline
PTEN	10	89692922	89692922	T	C	TCGA-56-8309-01A-11D-2293-08	LUSC		10	89692922	89692922	T	C	NM_000314.8(PTEN):c.406T>C (p.Cys136Arg)	Pathogenic	germline/somatic
PTEN	10	89653846	89653846	C	A	TCGA-56-8504-01A-11D-2395-08	LUSC		10	89653846	89653846	C	A	NM_000314.8(PTEN):c.144C>A (p.Asn48Lys)	Pathogenic/Likely pathogenic	germline
PTEN	10	89717615	89717615	C	T	TCGA-56-A49D-01A-11D-A24D-08	LUSC		10	89717615	89717615	C	T	NM_000314.8(PTEN):c.640C>T (p.Gln214Ter)	Pathogenic	germline
PTEN	10	89711873	89711873	A	G	TCGA-63-A5MG-01A-12D-A27K-08	LUSC		10	89711873	89711873	A	G	NM_000314.8(PTEN):c.493-2A>G	Pathogenic	germline/somatic
PTEN	10	89711890	89711890	A	C	TCGA-63-A5MH-01A-12D-A27K-08	LUSC		10	89711890	89711890	A	C	NM_000314.8(PTEN):c.508A>C (p.Ser170Arg)	Pathogenic	germline
PTEN	10	89711891	89711891	G	T	TCGA-63-A5MH-01A-12D-A27K-08	LUSC		10	89711891	89711891	G	T	NM_000314.8(PTEN):c.509G>T (p.Ser170Ile)	Pathogenic	germline/somatic
PTEN	10	89720726	89720726	G	T	TCGA-63-A5MR-01A-31D-A27K-08	LUSC		10	89720726	89720726	G	T	NM_000314.8(PTEN):c.877G>T (p.Gly293Ter)	Pathogenic	germline
PTEN	10	89717708	89717708	C	T	TCGA-66-2783-01A-01D-1267-08	LUSC		10	89717708	89717708	C	T	NM_000314.8(PTEN):c.733C>T (p.Gln245Ter)	Pathogenic	germline
PTEN	10	89692902	89692902	G	A	TCGA-68-7757-01B-11D-2293-08	LUSC		10	89692902	89692902	G	A	NM_000314.8(PTEN):c.386G>A (p.Gly129Glu)	Pathogenic	germline
PTEN	10	89692883	89692883	C	T	TCGA-73-4658-01A-01D-1753-08	LUAD		10	89692883	89692883	C	T	NM_000314.8(PTEN):c.367C>T (p.His123Tyr)	Pathogenic/Likely pathogenic	germline
PTEN	10	89692902	89692902	G	T	TCGA-76-4927-01A-01D-1486-08	GBM		10	89692902	89692902	G	T	NM_000314.8(PTEN):c.386G>T (p.Gly129Val)	Pathogenic	germline
PTEN	10	89712007	89712007	G	T	TCGA-76-4931-01A-01D-1486-08	GBM		10	89712007	89712007	G	T	NM_000314.8(PTEN):c.625G>T (p.Gly209Ter)	Pathogenic	germline
PTEN	10	89720650	89720650	G	A	TCGA-76-6192-01A-11D-1696-08	GBM		10	89720650	89720650	G	A	NM_000314.8(PTEN):c.802-1G>A	Pathogenic/Likely pathogenic	germline
PTEN	10	89653782	89653782	A	G	TCGA-76-6660-01A-11D-1845-08	GBM		10	89653782	89653782	A	G	NM_000314.8(PTEN):c.80A>G (p.Tyr27Cys)	Likely pathogenic	germline
PTEN	10	89720664	89720664	A	C	TCGA-76-6661-01B-11D-1845-08	GBM		10	89720664	89720664	A	C	NM_000314.8(PTEN):c.815A>C (p.His272Pro)	Likely pathogenic	germline
PTEN	10	89717672	89717672	C	T	TCGA-76-6662-01A-11D-1845-08	GBM		10	89717672	89717672	C	T	NM_000314.8(PTEN):c.697C>T (p.Arg233Ter)	Pathogenic	germline/somatic
PTEN	10	89624297	89624297	A	G	TCGA-77-6842-01A-11D-1945-08	LUSC		10	89624297	89624297	A	G	NM_000314.8(PTEN):c.71A>G (p.Asp24Gly)	Pathogenic/Likely pathogenic	germline
PTEN	10	89717609	89717609	G	C	TCGA-77-8136-01A-11D-2244-08	LUSC		10	89717609	89717609	G	C	NM_000314.8(PTEN):c.635-1G>C	Pathogenic	germline/somatic
PTEN	10	89692895	89692895	G	T	TCGA-77-A5GB-01B-11D-A27K-08	LUSC		10	89692895	89692895	G	T	NM_000314.8(PTEN):c.379G>T (p.Gly127Ter)	Pathogenic	germline
PTEN	10	89692923	89692923	G	A	TCGA-81-5911-01A-12D-1845-08	GBM		10	89692923	89692923	G	A	NM_000314.8(PTEN):c.407G>A (p.Cys136Tyr)	Pathogenic	germline
PTEN	10	89685281	89685281	C	G	TCGA-85-7698-01A-11D-2122-08	LUSC		10	89685281	89685281	C	G	NM_000314.8(PTEN):c.176C>G (p.Ser59Ter)	Pathogenic	germline
PTEN	10	89692902	89692902	G	A	TCGA-85-8353-01A-21D-2293-08	LUSC		10	89692902	89692902	G	A	NM_000314.8(PTEN):c.386G>A (p.Gly129Glu)	Pathogenic	germline
PTEN	10	89717777	89717777	G	T	TCGA-85-A50Z-01A-21D-A25L-08	LUSC		10	89717777	89717777	G	T	NM_000314.8(PTEN):c.801+1G>T	Pathogenic	germline/somatic
PTEN	10	89717708	89717708	C	T	TCGA-91-8499-01A-11D-2393-08	LUAD		10	89717708	89717708	C	T	NM_000314.8(PTEN):c.733C>T (p.Gln245Ter)	Pathogenic	germline
PTEN	10	89653815	89653815	C	G	TCGA-94-7033-01A-11D-1945-08	LUSC		10	89653815	89653815	C	G	NM_000314.8(PTEN):c.113C>G (p.Pro38Arg)	Pathogenic	germline
PTEN	10	89692904	89692904	C	T	TCGA-A1-A0SD-01A-11D-A10Y-09	BRCA		10	89692904	89692904	C	T	NM_000314.8(PTEN):c.388C>T (p.Arg130Ter)	Pathogenic	germline/somatic
PTEN	10	89712017	89712017	G	A	TCGA-A3-3308-01A-01D-0966-08	KIRC		10	89712017	89712017	G	A	NM_000314.8(PTEN):c.634+1G>A	Pathogenic/Likely pathogenic	germline
PTEN	10	89692794	89692794	A	G	TCGA-A5-A0R8-01A-11D-A10B-09	UCEC		10	89692794	89692794	A	G	NM_000314.8(PTEN):c.278A>G (p.His93Arg)	Pathogenic	germline
PTEN	10	89692904	89692904	C	G	TCGA-A5-A0RA-01A-21D-A10B-09	UCEC		10	89692904	89692904	C	G	NM_000314.8(PTEN):c.388C>G (p.Arg130Gly)	Pathogenic	germline/somatic
PTEN	10	89711900	89711900	G	A	TCGA-A5-A0VP-01A-21D-A10B-09	UCEC		10	89711900	89711900	G	A	NM_000314.8(PTEN):c.518G>A (p.Arg173His)	Pathogenic/Likely pathogenic	germline/somatic
PTEN	10	89717672	89717672	C	T	TCGA-A5-A0VP-01A-21D-A10B-09	UCEC		10	89717672	89717672	C	T	NM_000314.8(PTEN):c.697C>T (p.Arg233Ter)	Pathogenic	germline/somatic
PTEN	10	89692905	89692905	G	A	TCGA-A5-A1OF-01A-11D-A14G-09	UCEC		10	89692905	89692905	G	A	NM_000314.7(PTEN):c.389G>A (p.Arg130Gln)	Pathogenic	germline/somatic
PTEN	10	89692904	89692904	C	T	TCGA-A5-A1OJ-01A-11D-A14G-09	UCEC		10	89692904	89692904	C	T	NM_000314.8(PTEN):c.388C>T (p.Arg130Ter)	Pathogenic	germline/somatic
PTEN	10	89720744	89720744	G	T	TCGA-A5-A2K5-01A-11D-A17W-09	UCEC		10	89720744	89720744	G	T	NM_000314.8(PTEN):c.895G>T (p.Glu299Ter)	Pathogenic	germline
PTEN	10	89720808	89720808	T	A	TCGA-A5-A2K7-01A-11D-A17W-09	UCEC		10	89720808	89720808	T	A	NM_000314.8(PTEN):c.959T>A (p.Leu320Ter)	Pathogenic	germline
PTEN	10	89692920	89692920	T	A	TCGA-A7-A26G-01A-21D-A167-09	BRCA		10	89692920	89692920	T	A	NM_000314.8(PTEN):c.404T>A (p.Ile135Lys)	Likely pathogenic	germline
PTEN	10	89692905	89692905	G	A	TCGA-A7-A4SC-01A-12D-A25Q-09	BRCA		10	89692905	89692905	G	A	NM_000314.7(PTEN):c.389G>A (p.Arg130Gln)	Pathogenic	germline/somatic
PTEN	10	89692905	89692905	G	A	TCGA-AA-A010-01A-01D-A17O-10	COAD		10	89692905	89692905	G	A	NM_000314.7(PTEN):c.389G>A (p.Arg130Gln)	Pathogenic	germline/somatic
PTEN	10	89711874	89711874	G	A	TCGA-AG-4021-01A-01D-1733-10	READ		10	89711874	89711874	G	A	NM_000314.8(PTEN):c.493-1G>A	Pathogenic/Likely pathogenic	germline
PTEN	10	89624263	89624263	A	G	TCGA-AJ-A2QK-01A-11D-A18P-09	UCEC		10	89624263	89624263	A	G	NM_000314.8(PTEN):c.37A>G (p.Lys13Glu)	Likely pathogenic	germline
PTEN	10	89717650	89717650	T	G	TCGA-AJ-A2QL-01A-11D-A18P-09	UCEC		10	89717650	89717650	T	G	NM_000314.8(PTEN):c.675T>G (p.Tyr225Ter)	Pathogenic	germline
PTEN	10	89692905	89692905	G	A	TCGA-AJ-A2QN-01A-11D-A18P-09	UCEC		10	89692905	89692905	G	A	NM_000314.7(PTEN):c.389G>A (p.Arg130Gln)	Pathogenic	germline/somatic
PTEN	10	89692905	89692905	G	T	TCGA-AJ-A2QO-01A-11D-A18P-09	UCEC		10	89692905	89692905	G	T	NM_000314.8(PTEN):c.389G>T	Pathogenic/Likely pathogenic	germline/somatic
PTEN	10	89711891	89711891	G	T	TCGA-AJ-A2QO-01A-11D-A18P-09	UCEC		10	89711891	89711891	G	T	NM_000314.8(PTEN):c.509G>T (p.Ser170Ile)	Pathogenic	germline/somatic
PTEN	10	89692922	89692922	T	C	TCGA-AJ-A3BD-01A-11D-A19Y-09	UCEC		10	89692922	89692922	T	C	NM_000314.8(PTEN):c.406T>C (p.Cys136Arg)	Pathogenic	germline/somatic
PTEN	10	89717672	89717672	C	T	TCGA-AJ-A3BG-01A-11D-A19Y-09	UCEC		10	89717672	89717672	C	T	NM_000314.8(PTEN):c.697C>T (p.Arg233Ter)	Pathogenic	germline/somatic
PTEN	10	89692895	89692895	G	T	TCGA-AJ-A3BI-01A-11D-A20S-09	UCEC		10	89692895	89692895	G	T	NM_000314.8(PTEN):c.379G>T (p.Gly127Ter)	Pathogenic	germline
PTEN	10	89692905	89692905	G	A	TCGA-AJ-A3EK-01A-11D-A19Y-09	UCEC		10	89692905	89692905	G	A	NM_000314.7(PTEN):c.389G>A (p.Arg130Gln)	Pathogenic	germline/somatic
PTEN	10	89720744	89720744	G	T	TCGA-AJ-A3EK-01A-11D-A19Y-09	UCEC		10	89720744	89720744	G	T	NM_000314.8(PTEN):c.895G>T (p.Glu299Ter)	Pathogenic	germline
PTEN	10	89720744	89720744	G	T	TCGA-AJ-A3EL-01A-11D-A20S-09	UCEC		10	89720744	89720744	G	T	NM_000314.8(PTEN):c.895G>T (p.Glu299Ter)	Pathogenic	germline
PTEN	10	89692901	89692901	G	A	TCGA-AJ-A3I9-01A-11D-A228-09	UCEC		10	89692901	89692901	G	A	NM_000314.8(PTEN):c.385G>A (p.Gly129Arg)	Pathogenic/Likely pathogenic	germline
PTEN	10	89692904	89692904	C	G	TCGA-AJ-A3NG-01A-11D-A228-09	UCEC		10	89692904	89692904	C	G	NM_000314.8(PTEN):c.388C>G (p.Arg130Gly)	Pathogenic	germline/somatic
PTEN	10	89692905	89692905	G	A	TCGA-AJ-A3NG-01A-11D-A228-09	UCEC		10	89692905	89692905	G	A	NM_000314.7(PTEN):c.389G>A (p.Arg130Gln)	Pathogenic	germline/somatic
PTEN	10	89692905	89692905	G	A	TCGA-AJ-A3OK-01A-12D-A228-09	UCEC		10	89692905	89692905	G	A	NM_000314.7(PTEN):c.389G>A (p.Arg130Gln)	Pathogenic	germline/somatic
PTEN	10	89711900	89711900	G	A	TCGA-AJ-A3OK-01A-12D-A228-09	UCEC		10	89711900	89711900	G	A	NM_000314.8(PTEN):c.518G>A (p.Arg173His)	Pathogenic/Likely pathogenic	germline/somatic
PTEN	10	89720876	89720876	G	A	TCGA-AJ-A3OK-01A-12D-A228-09	UCEC		10	89720876	89720876	G	A	NM_000314.8(PTEN):c.1026+1G>A	Pathogenic	germline/somatic
PTEN	10	89717672	89717672	C	T	TCGA-AJ-A5DV-01A-11D-A27P-09	UCEC		10	89717672	89717672	C	T	NM_000314.8(PTEN):c.697C>T (p.Arg233Ter)	Pathogenic	germline/somatic
PTEN	10	89692905	89692905	G	A	TCGA-AJ-A5DW-01A-11D-A27P-09	UCEC		10	89692905	89692905	G	A	NM_000314.7(PTEN):c.389G>A (p.Arg130Gln)	Pathogenic	germline/somatic
PTEN	10	89692905	89692905	G	A	TCGA-AJ-A8CT-01A-11D-A37N-09	UCEC		10	89692905	89692905	G	A	NM_000314.7(PTEN):c.389G>A (p.Arg130Gln)	Pathogenic	germline/somatic
PTEN	10	89653867	89653867	G	T	TCGA-AJ-A8CV-01A-11D-A37N-09	UCEC		10	89653867	89653867	G	T	NM_000314.8(PTEN):c.164+1G>T	Pathogenic	germline
PTEN	10	89692900	89692900	G	C	TCGA-AN-A0XW-01A-11D-A10G-09	BRCA		10	89692900	89692900	G	C	NM_000314.8(PTEN):c.384G>C (p.Lys128Asn)	Likely pathogenic	germline
PTEN	10	89692904	89692904	C	T	TCGA-AO-A128-01A-11D-A10M-09	BRCA		10	89692904	89692904	C	T	NM_000314.8(PTEN):c.388C>T (p.Arg130Ter)	Pathogenic	germline/somatic
PTEN	10	89653780	89653780	A	C	TCGA-AP-A059-01A-21D-A122-09	UCEC		10	89653780	89653780	A	C	NM_000314.8(PTEN):c.80-2A>C	Likely pathogenic	germline
PTEN	10	89717672	89717672	C	T	TCGA-AP-A0LE-01A-11D-A127-09	UCEC		10	89717672	89717672	C	T	NM_000314.8(PTEN):c.697C>T (p.Arg233Ter)	Pathogenic	germline/somatic
PTEN	10	89692904	89692904	C	G	TCGA-AP-A0LP-01A-12D-A10B-09	UCEC		10	89692904	89692904	C	G	NM_000314.8(PTEN):c.388C>G (p.Arg130Gly)	Pathogenic	germline/somatic
PTEN	10	89692922	89692922	T	C	TCGA-AP-A0LQ-01A-12D-A10B-09	UCEC		10	89692922	89692922	T	C	NM_000314.8(PTEN):c.406T>C (p.Cys136Arg)	Pathogenic	germline/somatic
PTEN	10	89711882	89711882	C	A	TCGA-AP-A1DH-01A-31D-A135-09	UCEC		10	89711882	89711882	C	A	NM_000314.8(PTEN):c.500C>A (p.Thr167Asn)	Likely pathogenic	germline
PTEN	10	89717672	89717672	C	T	TCGA-AP-A1DK-01A-11D-A135-09	UCEC		10	89717672	89717672	C	T	NM_000314.8(PTEN):c.697C>T (p.Arg233Ter)	Pathogenic	germline/somatic
PTEN	10	89624270	89624270	G	A	TCGA-AP-A1E0-01A-11D-A135-09	UCEC		10	89624270	89624270	G	A	NM_000314.8(PTEN):c.44G>A (p.Arg15Lys)	Likely pathogenic	germline
PTEN	10	89692901	89692901	G	C	TCGA-AP-A1E0-01A-11D-A135-09	UCEC		10	89692901	89692901	G	C	NM_000314.8(PTEN):c.385G>C (p.Gly129Arg)	Pathogenic	germline
PTEN	10	89653867	89653867	G	A	TCGA-AP-A1E1-01A-11D-A135-09	UCEC		10	89653867	89653867	G	A	NM_000314.8(PTEN):c.164+1G>A	Pathogenic	germline
PTEN	10	89717672	89717672	C	T	TCGA-AP-A1E1-01A-11D-A135-09	UCEC		10	89717672	89717672	C	T	NM_000314.8(PTEN):c.697C>T (p.Arg233Ter)	Pathogenic	germline/somatic
PTEN	10	89692883	89692883	C	G	TCGA-AR-A24Q-01A-12D-A167-09	BRCA		10	89692883	89692883	C	G	NM_000314.8(PTEN):c.367C>G (p.His123Asp)	Pathogenic	germline
PTEN	10	89692886	89692886	T	A	TCGA-AR-A2LL-01A-11D-A17W-09	BRCA		10	89692886	89692886	T	A	NM_000314.8(PTEN):c.370T>A (p.Cys124Ser)	Likely pathogenic	germline
PTEN	10	89692905	89692905	G	A	TCGA-AR-A5QQ-01A-11D-A28B-09	BRCA		10	89692905	89692905	G	A	NM_000314.7(PTEN):c.389G>A (p.Arg130Gln)	Pathogenic	germline/somatic
PTEN	10	89692791	89692791	A	G	TCGA-AX-A06H-01A-11D-A122-09	UCEC		10	89692791	89692791	A	G	NM_000314.8(PTEN):c.275A>G (p.Asp92Gly)	Likely pathogenic	germline
PTEN	10	89692964	89692964	G	T	TCGA-AX-A06H-01A-11D-A122-09	UCEC		10	89692964	89692964	G	T	NM_000314.8(PTEN):c.448G>T (p.Glu150Ter)	Pathogenic	germline
PTEN	10	89690801	89690801	A	G	TCGA-AX-A06L-01A-11D-A122-09	UCEC		10	89690801	89690801	A	G	NM_000314.8(PTEN):c.210-2A>G	Likely pathogenic	germline/somatic
PTEN	10	89692905	89692905	G	A	TCGA-AX-A0J0-01A-11D-A117-09	UCEC		10	89692905	89692905	G	A	NM_000314.7(PTEN):c.389G>A (p.Arg130Gln)	Pathogenic	germline/somatic
PTEN	10	89692922	89692922	T	C	TCGA-AX-A1C5-01A-11D-A135-09	UCEC		10	89692922	89692922	T	C	NM_000314.8(PTEN):c.406T>C (p.Cys136Arg)	Pathogenic	germline/somatic
PTEN	10	89717672	89717672	C	T	TCGA-AX-A1C5-01A-11D-A135-09	UCEC		10	89717672	89717672	C	T	NM_000314.8(PTEN):c.697C>T (p.Arg233Ter)	Pathogenic	germline/somatic
PTEN	10	89711900	89711900	G	A	TCGA-AX-A1C9-01A-11D-A135-09	UCEC		10	89711900	89711900	G	A	NM_000314.8(PTEN):c.518G>A (p.Arg173His)	Pathogenic/Likely pathogenic	germline/somatic
PTEN	10	89717672	89717672	C	T	TCGA-AX-A1C9-01A-11D-A135-09	UCEC		10	89717672	89717672	C	T	NM_000314.8(PTEN):c.697C>T (p.Arg233Ter)	Pathogenic	germline/somatic
PTEN	10	89717712	89717712	C	T	TCGA-AX-A1C9-01A-11D-A135-09	UCEC		10	89717712	89717712	C	T	NM_000314.8(PTEN):c.737C>T (p.Pro246Leu)	Pathogenic	germline
PTEN	10	89725043	89725043	G	A	TCGA-AX-A1CK-01A-11D-A135-09	UCEC		10	89725043	89725043	G	A	NM_000314.8(PTEN):c.1027-1G>A	Pathogenic	germline/somatic
PTEN	10	89711894	89711894	A	G	TCGA-AX-A2HC-01A-11D-A17D-09	UCEC		10	89711894	89711894	A	G	NM_000314.8(PTEN):c.512A>G (p.Gln171Arg)	Likely pathogenic	germline
PTEN	10	89720876	89720876	G	A	TCGA-AX-A2HD-01A-21D-A17D-09	UCEC		10	89720876	89720876	G	A	NM_000314.8(PTEN):c.1026+1G>A	Pathogenic	germline/somatic
PTEN	10	89717672	89717672	C	T	TCGA-AX-A2HJ-01A-11D-A17D-09	UCEC		10	89717672	89717672	C	T	NM_000314.8(PTEN):c.697C>T (p.Arg233Ter)	Pathogenic	germline/somatic
PTEN	10	89711900	89711900	G	A	TCGA-AX-A3FS-01A-11D-A228-09	UCEC		10	89711900	89711900	G	A	NM_000314.8(PTEN):c.518G>A (p.Arg173His)	Pathogenic/Likely pathogenic	germline/somatic
PTEN	10	89624275	89624275	C	T	TCGA-AX-A3FX-01A-11D-A228-09	UCEC		10	89624275	89624275	C	T	NM_000314.8(PTEN):c.49C>T (p.Gln17Ter)	Pathogenic	germline
PTEN	10	89692904	89692904	C	G	TCGA-AX-A3FZ-01A-11D-A228-09	UCEC		10	89692904	89692904	C	G	NM_000314.8(PTEN):c.388C>G (p.Arg130Gly)	Pathogenic	germline/somatic
PTEN	10	89692818	89692818	T	C	TCGA-AX-A3G6-01A-11D-A20S-09	UCEC		10	89692818	89692818	T	C	NM_000314.8(PTEN):c.302T>C (p.Ile101Thr)	Pathogenic/Likely pathogenic	germline
PTEN	10	89692911	89692911	G	A	TCGA-AX-A3G8-01A-11D-A228-09	UCEC		10	89692911	89692911	G	A	NM_000314.8(PTEN):c.395G>A (p.Gly132Asp)	Likely pathogenic	germline
PTEN	10	89692904	89692904	C	G	TCGA-AX-A3G9-01A-11D-A228-09	UCEC		10	89692904	89692904	C	G	NM_000314.8(PTEN):c.388C>G (p.Arg130Gly)	Pathogenic	germline/somatic
PTEN	10	89692905	89692905	G	A	TCGA-AZ-4315-01A-01D-1408-10	COAD		10	89692905	89692905	G	A	NM_000314.7(PTEN):c.389G>A (p.Arg130Gln)	Pathogenic	germline/somatic
PTEN	10	89711899	89711899	C	T	TCGA-AZ-4315-01A-01D-1408-10	COAD		10	89711899	89711899	C	T	NM_000314.8(PTEN):c.517C>T (p.Arg173Cys)	Pathogenic	germline/somatic
PTEN	10	89725043	89725043	G	A	TCGA-B0-4810-01A-01D-1501-10	KIRC		10	89725043	89725043	G	A	NM_000314.8(PTEN):c.1027-1G>A	Pathogenic	germline/somatic
PTEN	10	89717672	89717672	C	T	TCGA-B5-A0JU-01B-11D-A14G-09	UCEC		10	89717672	89717672	C	T	NM_000314.8(PTEN):c.697C>T (p.Arg233Ter)	Pathogenic	germline/somatic
PTEN	10	89624245	89624245	G	T	TCGA-B5-A0JY-01A-11D-A10B-09	UCEC		10	89624245	89624245	G	T	NM_000314.8(PTEN):c.19G>T (p.Glu7Ter)	Likely pathogenic	germline
PTEN	10	89692964	89692964	G	T	TCGA-B5-A0K9-01A-21D-A10O-09	UCEC		10	89692964	89692964	G	T	NM_000314.8(PTEN):c.448G>T (p.Glu150Ter)	Pathogenic	germline
PTEN	10	89685308	89685308	A	G	TCGA-B5-A11E-01A-11D-A10M-09	UCEC		10	89685308	89685308	A	G	NM_000314.8(PTEN):c.203A>G (p.Tyr68Cys)	Pathogenic	germline
PTEN	10	89720744	89720744	G	T	TCGA-B5-A11E-01A-11D-A10M-09	UCEC		10	89720744	89720744	G	T	NM_000314.8(PTEN):c.895G>T (p.Glu299Ter)	Pathogenic	germline
PTEN	10	89717697	89717697	T	C	TCGA-B5-A11F-01A-11D-A10M-09	UCEC		10	89717697	89717697	T	C	NM_000314.8(PTEN):c.722T>C (p.Phe241Ser)	Likely pathogenic	germline
PTEN	10	89624297	89624297	A	G	TCGA-B5-A11J-01A-11D-A122-09	UCEC		10	89624297	89624297	A	G	NM_000314.8(PTEN):c.71A>G (p.Asp24Gly)	Pathogenic/Likely pathogenic	germline
PTEN	10	89685300	89685300	C	G	TCGA-B5-A11J-01A-11D-A122-09	UCEC		10	89685300	89685300	C	G	NM_000314.8(PTEN):c.195C>G (p.Tyr65Ter)	Pathogenic	germline
PTEN	10	89711875	89711875	G	A	TCGA-B5-A11M-01A-11D-A122-09	UCEC		10	89711875	89711875	G	A	NM_000314.8(PTEN):c.493G>A (p.Gly165Arg)	Pathogenic	germline
PTEN	10	89624245	89624245	G	T	TCGA-B5-A11N-01A-11D-A122-09	UCEC		10	89624245	89624245	G	T	NM_000314.8(PTEN):c.19G>T (p.Glu7Ter)	Likely pathogenic	germline
PTEN	10	89711899	89711899	C	T	TCGA-B5-A11N-01A-11D-A122-09	UCEC		10	89711899	89711899	C	T	NM_000314.8(PTEN):c.517C>T (p.Arg173Cys)	Pathogenic	germline/somatic
PTEN	10	89692905	89692905	G	A	TCGA-B5-A11O-01A-11D-A122-09	UCEC		10	89692905	89692905	G	A	NM_000314.7(PTEN):c.389G>A (p.Arg130Gln)	Pathogenic	germline/somatic
PTEN	10	89692904	89692904	C	G	TCGA-B5-A11P-01B-11D-A14G-09	UCEC		10	89692904	89692904	C	G	NM_000314.8(PTEN):c.388C>G (p.Arg130Gly)	Pathogenic	germline/somatic
PTEN	10	89692904	89692904	C	T	TCGA-B5-A11R-01A-11D-A122-09	UCEC		10	89692904	89692904	C	T	NM_000314.8(PTEN):c.388C>T (p.Arg130Ter)	Pathogenic	germline/somatic
PTEN	10	89692905	89692905	G	T	TCGA-B5-A11V-01A-11D-A10M-09	UCEC		10	89692905	89692905	G	T	NM_000314.8(PTEN):c.389G>T	Pathogenic/Likely pathogenic	germline/somatic
PTEN	10	89711875	89711875	G	A	TCGA-B5-A11V-01A-11D-A10M-09	UCEC		10	89711875	89711875	G	A	NM_000314.8(PTEN):c.493G>A (p.Gly165Arg)	Pathogenic	germline
PTEN	10	89692904	89692904	C	T	TCGA-B5-A11Y-01A-21D-A10M-09	UCEC		10	89692904	89692904	C	T	NM_000314.8(PTEN):c.388C>T (p.Arg130Ter)	Pathogenic	germline/somatic
PTEN	10	89692904	89692904	C	G	TCGA-B5-A11Z-01A-11D-A10M-09	UCEC		10	89692904	89692904	C	G	NM_000314.8(PTEN):c.388C>G (p.Arg130Gly)	Pathogenic	germline/somatic
PTEN	10	89717672	89717672	C	T	TCGA-B5-A1MR-01A-31D-A14G-09	UCEC		10	89717672	89717672	C	T	NM_000314.8(PTEN):c.697C>T (p.Arg233Ter)	Pathogenic	germline/somatic
PTEN	10	89692769	89692769	G	A	TCGA-B5-A1MX-01A-11D-A142-09	UCEC		10	89692769	89692769	G	A	NM_000314.8(PTEN):c.254-1G>A	Pathogenic/Likely pathogenic	germline
PTEN	10	89711875	89711875	G	T	TCGA-B5-A1MX-01A-11D-A142-09	UCEC		10	89711875	89711875	G	T	NM_000314.8(PTEN):c.493G>T (p.Gly165Ter)	Pathogenic	germline
PTEN	10	89712007	89712007	G	T	TCGA-B5-A1MZ-01A-11D-A142-09	UCEC		10	89712007	89712007	G	T	NM_000314.8(PTEN):c.625G>T (p.Gly209Ter)	Pathogenic	germline
PTEN	10	89692905	89692905	G	A	TCGA-B5-A3FA-01A-11D-A19Y-09	UCEC		10	89692905	89692905	G	A	NM_000314.7(PTEN):c.389G>A (p.Arg130Gln)	Pathogenic	germline/somatic
PTEN	10	89711899	89711899	C	T	TCGA-B5-A3FA-01A-11D-A19Y-09	UCEC		10	89711899	89711899	C	T	NM_000314.8(PTEN):c.517C>T (p.Arg173Cys)	Pathogenic	germline/somatic
PTEN	10	89653867	89653867	G	A	TCGA-B5-A3FC-01A-11D-A228-09	UCEC		10	89653867	89653867	G	A	NM_000314.8(PTEN):c.164+1G>A	Pathogenic	germline
PTEN	10	89692905	89692905	G	A	TCGA-B6-A0WT-01A-11D-A10G-09	BRCA		10	89692905	89692905	G	A	NM_000314.7(PTEN):c.389G>A (p.Arg130Gln)	Pathogenic	germline/somatic
PTEN	10	89717771	89717771	A	T	TCGA-B6-A0WW-01A-11D-A10G-09	BRCA		10	89717771	89717771	A	T	NM_000314.8(PTEN):c.796A>T (p.Lys266Ter)	Pathogenic	germline
PTEN	10	89692905	89692905	G	A	TCGA-B7-A5TI-01A-11D-A31L-08	STAD		10	89692905	89692905	G	A	NM_000314.7(PTEN):c.389G>A (p.Arg130Gln)	Pathogenic	germline/somatic
PTEN	10	89711893	89711893	C	T	TCGA-BA-4074-01A-01D-1434-08	HNSC		10	89711893	89711893	C	T	NM_000314.8(PTEN):c.511C>T (p.Gln171Ter)	Pathogenic	germline
PTEN	10	89692905	89692905	G	A	TCGA-BB-A6UM-01A-12D-A34J-08	HNSC		10	89692905	89692905	G	A	NM_000314.7(PTEN):c.389G>A (p.Arg130Gln)	Pathogenic	germline/somatic
PTEN	10	89692904	89692904	C	T	TCGA-BF-A1PU-01A-11D-A19A-08	SKCM		10	89692904	89692904	C	T	NM_000314.8(PTEN):c.388C>T (p.Arg130Ter)	Pathogenic	germline/somatic
PTEN	10	89717615	89717615	C	T	TCGA-BG-A0MA-01A-11D-A17D-09	UCEC		10	89717615	89717615	C	T	NM_000314.8(PTEN):c.640C>T (p.Gln214Ter)	Pathogenic	germline
PTEN	10	89720875	89720875	G	T	TCGA-BG-A0MG-01A-21D-A10B-09	UCEC		10	89720875	89720875	G	T	NM_000314.8(PTEN):c.1026G>T (p.Lys342Asn)	Likely pathogenic	germline
PTEN	10	89720876	89720876	G	A	TCGA-BG-A0MK-01A-51D-A19Y-09	UCEC		10	89720876	89720876	G	A	NM_000314.8(PTEN):c.1026+1G>A	Pathogenic	germline/somatic
PTEN	10	89692904	89692904	C	G	TCGA-BG-A0MQ-01A-11D-A10B-09	UCEC		10	89692904	89692904	C	G	NM_000314.8(PTEN):c.388C>G (p.Arg130Gly)	Pathogenic	germline/somatic
PTEN	10	89692904	89692904	C	G	TCGA-BG-A0MU-01A-11D-A10B-09	UCEC		10	89692904	89692904	C	G	NM_000314.8(PTEN):c.388C>G (p.Arg130Gly)	Pathogenic	germline/somatic
PTEN	10	89717672	89717672	C	T	TCGA-BG-A0RY-01A-11D-A10B-09	UCEC		10	89717672	89717672	C	T	NM_000314.8(PTEN):c.697C>T (p.Arg233Ter)	Pathogenic	germline/somatic
PTEN	10	89692905	89692905	G	A	TCGA-BG-A0VZ-01A-11D-A10G-09	UCEC		10	89692905	89692905	G	A	NM_000314.7(PTEN):c.389G>A (p.Arg130Gln)	Pathogenic	germline/somatic
PTEN	10	89692904	89692904	C	G	TCGA-BG-A0W2-01A-11D-A117-09	UCEC		10	89692904	89692904	C	G	NM_000314.8(PTEN):c.388C>G (p.Arg130Gly)	Pathogenic	germline/somatic
PTEN	10	89717672	89717672	C	T	TCGA-BG-A18B-01A-11D-A12J-09	UCEC		10	89717672	89717672	C	T	NM_000314.8(PTEN):c.697C>T (p.Arg233Ter)	Pathogenic	germline/somatic
PTEN	10	89692904	89692904	C	G	TCGA-BG-A3EW-01A-11D-A228-09	UCEC		10	89692904	89692904	C	G	NM_000314.8(PTEN):c.388C>G (p.Arg130Gly)	Pathogenic	germline/somatic
PTEN	10	89692905	89692905	G	C	TCGA-BH-A0H5-01A-21D-A10Y-09	BRCA		10	89692905	89692905	G	C	NM_000314.8(PTEN):c.389G>C (p.Arg130Pro)	Pathogenic	germline/somatic
PTEN	10	89712018	89712018	T	C	TCGA-BH-A0HP-01A-12D-A099-09	BRCA		10	89712018	89712018	T	C	NM_000314.8(PTEN):c.634+2T>C	Pathogenic	germline
PTEN	10	89720709	89720709	C	G	TCGA-BH-A2L8-01A-11D-A18P-09	BRCA		10	89720709	89720709	C	G	NM_000314.8(PTEN):c.860C>G (p.Ser287Ter)	Pathogenic/Likely pathogenic	germline
PTEN	10	89717615	89717615	C	T	TCGA-BI-A0VR-01A-11D-A10S-08	CESC		10	89717615	89717615	C	T	NM_000314.8(PTEN):c.640C>T (p.Gln214Ter)	Pathogenic	germline
PTEN	10	89692905	89692905	G	A	TCGA-BK-A0CA-01A-21D-A272-09	UCEC		10	89692905	89692905	G	A	NM_000314.7(PTEN):c.389G>A (p.Arg130Gln)	Pathogenic	germline/somatic
PTEN	10	89692904	89692904	C	G	TCGA-BK-A0CB-01A-32D-A10B-09	UCEC		10	89692904	89692904	C	G	NM_000314.8(PTEN):c.388C>G (p.Arg130Gly)	Pathogenic	germline/somatic
PTEN	10	89692905	89692905	G	T	TCGA-BK-A139-01A-11D-A272-09	UCEC		10	89692905	89692905	G	T	NM_000314.8(PTEN):c.389G>T	Pathogenic/Likely pathogenic	germline/somatic
PTEN	10	89653808	89653808	G	C	TCGA-BK-A13B-01A-51D-A228-09	UCEC		10	89653808	89653808	G	C	NM_000314.8(PTEN):c.106G>C (p.Gly36Arg)	Pathogenic	germline
PTEN	10	89720650	89720650	G	A	TCGA-BK-A13C-01A-11D-A122-09	UCEC		10	89720650	89720650	G	A	NM_000314.8(PTEN):c.802-1G>A	Pathogenic/Likely pathogenic	germline
PTEN	10	89692905	89692905	G	A	TCGA-BK-A6W3-01A-12D-A34Q-09	UCEC		10	89692905	89692905	G	A	NM_000314.7(PTEN):c.389G>A (p.Arg130Gln)	Pathogenic	germline/somatic
PTEN	10	89624275	89624275	C	T	TCGA-BL-A5ZZ-01A-31D-A30E-08	BLCA		10	89624275	89624275	C	T	NM_000314.8(PTEN):c.49C>T (p.Gln17Ter)	Pathogenic	germline
PTEN	10	89725042	89725042	A	G	TCGA-BP-4161-01A-02D-1386-10	KIRC		10	89725042	89725042	A	G	NM_000314.8(PTEN):c.1027-2A>G	Pathogenic/Likely pathogenic	germline
PTEN	10	89720741	89720741	C	T	TCGA-BP-5199-01A-01D-1429-08	KIRC		10	89720741	89720741	C	T	NM_000314.8(PTEN):c.892C>T (p.Gln298Ter)	Pathogenic	germline
PTEN	10	89692905	89692905	G	A	TCGA-BR-6707-01A-11D-1882-08	STAD		10	89692905	89692905	G	A	NM_000314.7(PTEN):c.389G>A (p.Arg130Gln)	Pathogenic	germline/somatic
PTEN	10	89692993	89692993	G	T	TCGA-BR-7704-01A-11D-2053-08	STAD		10	89692993	89692993	G	T	NM_000314.8(PTEN):c.477G>T (p.Arg159Ser)	Likely pathogenic	germline/somatic
PTEN	10	89717672	89717672	C	T	TCGA-BR-8284-01A-11D-2340-08	STAD		10	89717672	89717672	C	T	NM_000314.8(PTEN):c.697C>T (p.Arg233Ter)	Pathogenic	germline/somatic
PTEN	10	89717672	89717672	C	T	TCGA-BR-8487-01A-11D-2394-08	STAD		10	89717672	89717672	C	T	NM_000314.8(PTEN):c.697C>T (p.Arg233Ter)	Pathogenic	germline/somatic
PTEN	10	89692902	89692902	G	T	TCGA-BS-A0TA-01A-11D-A10B-09	UCEC		10	89692902	89692902	G	T	NM_000314.8(PTEN):c.386G>T (p.Gly129Val)	Pathogenic	germline
PTEN	10	89692904	89692904	C	G	TCGA-BS-A0TC-01A-11D-A10B-09	UCEC		10	89692904	89692904	C	G	NM_000314.8(PTEN):c.388C>G (p.Arg130Gly)	Pathogenic	germline/somatic
PTEN	10	89692953	89692953	T	G	TCGA-BS-A0TC-01A-11D-A10B-09	UCEC		10	89692953	89692953	T	G	NM_000314.8(PTEN):c.437T>G (p.Leu146Ter)	Pathogenic	germline
PTEN	10	89653820	89653820	G	T	TCGA-BS-A0TI-01A-11D-A10B-09	UCEC		10	89653820	89653820	G	T	NM_000314.8(PTEN):c.118G>T (p.Glu40Ter)	Pathogenic	germline
PTEN	10	89717672	89717672	C	T	TCGA-BS-A0TJ-01A-11D-A10B-09	UCEC		10	89717672	89717672	C	T	NM_000314.8(PTEN):c.697C>T (p.Arg233Ter)	Pathogenic	germline/somatic
PTEN	10	89720876	89720876	G	A	TCGA-BS-A0TJ-01A-11D-A10B-09	UCEC		10	89720876	89720876	G	A	NM_000314.8(PTEN):c.1026+1G>A	Pathogenic	germline/somatic
PTEN	10	89692904	89692904	C	T	TCGA-BS-A0U7-01A-21D-A10B-09	UCEC		10	89692904	89692904	C	T	NM_000314.8(PTEN):c.388C>T (p.Arg130Ter)	Pathogenic	germline/somatic
PTEN	10	89692985	89692985	G	T	TCGA-BS-A0U8-01A-11D-A10B-09	UCEC		10	89692985	89692985	G	T	NM_000314.8(PTEN):c.469G>T (p.Glu157Ter)	Pathogenic	germline
PTEN	10	89692802	89692802	C	G	TCGA-BS-A0UA-01A-11D-A122-09	UCEC		10	89692802	89692802	C	G	NM_000314.8(PTEN):c.286C>G (p.Pro96Ala)	Pathogenic	germline
PTEN	10	89692905	89692905	G	A	TCGA-BS-A0UF-01A-11D-A10B-09	UCEC		10	89692905	89692905	G	A	NM_000314.7(PTEN):c.389G>A (p.Arg130Gln)	Pathogenic	germline/somatic
PTEN	10	89717672	89717672	C	T	TCGA-BS-A0UJ-01A-12D-A10B-09	UCEC		10	89717672	89717672	C	T	NM_000314.8(PTEN):c.697C>T (p.Arg233Ter)	Pathogenic	germline/somatic
PTEN	10	89692905	89692905	G	A	TCGA-BS-A0UV-01A-11D-A10B-09	UCEC		10	89692905	89692905	G	A	NM_000314.7(PTEN):c.389G>A (p.Arg130Gln)	Pathogenic	germline/somatic
PTEN	10	89692904	89692904	C	G	TCGA-BS-A0V4-01A-11D-A14G-09	UCEC		10	89692904	89692904	C	G	NM_000314.8(PTEN):c.388C>G (p.Arg130Gly)	Pathogenic	germline/somatic
PTEN	10	89692923	89692923	G	A	TCGA-BS-A0V4-01A-11D-A14G-09	UCEC		10	89692923	89692923	G	A	NM_000314.8(PTEN):c.407G>A (p.Cys136Tyr)	Pathogenic	germline
PTEN	10	89692904	89692904	C	G	TCGA-BS-A0V6-01A-11D-A122-09	UCEC		10	89692904	89692904	C	G	NM_000314.8(PTEN):c.388C>G (p.Arg130Gly)	Pathogenic	germline/somatic
PTEN	10	89692895	89692895	G	A	TCGA-BS-A0V8-01A-11D-A122-09	UCEC		10	89692895	89692895	G	A	NM_000314.8(PTEN):c.379G>A (p.Gly127Arg)	Likely pathogenic	germline
PTEN	10	89692911	89692911	G	A	TCGA-BS-A0V8-01A-11D-A122-09	UCEC		10	89692911	89692911	G	A	NM_000314.8(PTEN):c.395G>A (p.Gly132Asp)	Likely pathogenic	germline
PTEN	10	89692904	89692904	C	G	TCGA-BS-A0VI-01A-11D-A14G-09	UCEC		10	89692904	89692904	C	G	NM_000314.8(PTEN):c.388C>G (p.Arg130Gly)	Pathogenic	germline/somatic
PTEN	10	89685300	89685300	C	G	TCGA-C5-A1BM-01A-11D-A13W-08	CESC		10	89685300	89685300	C	G	NM_000314.8(PTEN):c.195C>G (p.Tyr65Ter)	Pathogenic	germline
PTEN	10	89717661	89717661	C	G	TCGA-C5-A7CL-01A-11D-A32I-09	CESC		10	89717661	89717661	C	G	NM_000314.8(PTEN):c.686C>G (p.Ser229Ter)	Pathogenic	germline
PTEN	10	89692953	89692953	T	A	TCGA-C8-A12V-01A-11D-A10Y-09	BRCA		10	89692953	89692953	T	A	NM_000314.8(PTEN):c.437T>A (p.Leu146Ter)	Pathogenic	germline
PTEN	10	89720709	89720709	C	G	TCGA-C8-A26Y-01A-11D-A16D-09	BRCA		10	89720709	89720709	C	G	NM_000314.8(PTEN):c.860C>G (p.Ser287Ter)	Pathogenic/Likely pathogenic	germline
PTEN	10	89692849	89692849	G	A	TCGA-CA-6718-01A-11D-1835-10	COAD		10	89692849	89692849	G	A	NM_000314.8(PTEN):c.333G>A (p.Trp111Ter)	Pathogenic	germline
PTEN	10	89712017	89712017	G	T	TCGA-CC-A5UD-01A-11D-A28X-10	LIHC		10	89712017	89712017	G	T	NM_000314.8(PTEN):c.634+1G>T	Pathogenic	germline
PTEN	10	89720826	89720826	A	G	TCGA-CH-5740-01A-11D-1576-08	PRAD		10	89720826	89720826	A	G	NM_000314.8(PTEN):c.977A>G (p.Asp326Gly)	Likely pathogenic	germline
PTEN	10	89690802	89690802	G	A	TCGA-CH-5791-01A-11D-1576-08	PRAD		10	89690802	89690802	G	A	NM_000314.8(PTEN):c.210-1G>A	Pathogenic	germline
PTEN	10	89692911	89692911	G	T	TCGA-CI-6622-01A-11D-1826-10	READ		10	89692911	89692911	G	T	NM_000314.8(PTEN):c.395G>T (p.Gly132Val)	Pathogenic/Likely pathogenic	germline
PTEN	10	89692794	89692794	A	G	TCGA-CR-7369-01A-11D-2129-08	HNSC		10	89692794	89692794	A	G	NM_000314.8(PTEN):c.278A>G (p.His93Arg)	Pathogenic	germline
PTEN	10	89711899	89711899	C	T	TCGA-CS-5395-01A-01D-1468-08	LGG		10	89711899	89711899	C	T	NM_000314.8(PTEN):c.517C>T (p.Arg173Cys)	Pathogenic	germline/somatic
PTEN	10	89692805	89692805	C	T	TCGA-CV-7238-01A-11D-2012-08	HNSC		10	89692805	89692805	C	T	NM_000314.8(PTEN):c.289C>T (p.Gln97Ter)	Pathogenic	germline
PTEN	10	89692904	89692904	C	G	TCGA-D1-A0ZR-01A-21D-A10M-09	UCEC		10	89692904	89692904	C	G	NM_000314.8(PTEN):c.388C>G (p.Arg130Gly)	Pathogenic	germline/somatic
PTEN	10	89711875	89711875	G	A	TCGA-D1-A0ZS-01A-11D-A122-09	UCEC		10	89711875	89711875	G	A	NM_000314.8(PTEN):c.493G>A (p.Gly165Arg)	Pathogenic	germline
PTEN	10	89720857	89720857	C	G	TCGA-D1-A0ZU-01A-11D-A10M-09	UCEC		10	89720857	89720857	C	G	NM_000314.8(PTEN):c.1008C>G (p.Tyr336Ter)	Pathogenic	germline
PTEN	10	89720852	89720852	C	T	TCGA-D1-A102-01A-11D-A10M-09	UCEC		10	89720852	89720852	C	T	NM_000314.8(PTEN):c.1003C>T (p.Arg335Ter)	Pathogenic	germline/somatic
PTEN	10	89624245	89624245	G	T	TCGA-D1-A103-01A-11D-A10M-09	UCEC		10	89624245	89624245	G	T	NM_000314.8(PTEN):c.19G>T (p.Glu7Ter)	Likely pathogenic	germline
PTEN	10	89692904	89692904	C	G	TCGA-D1-A15W-01A-11D-A122-09	UCEC		10	89692904	89692904	C	G	NM_000314.8(PTEN):c.388C>G (p.Arg130Gly)	Pathogenic	germline/somatic
PTEN	10	89692905	89692905	G	A	TCGA-D1-A15W-01A-11D-A122-09	UCEC		10	89692905	89692905	G	A	NM_000314.7(PTEN):c.389G>A (p.Arg130Gln)	Pathogenic	germline/somatic
PTEN	10	89692953	89692953	T	A	TCGA-D1-A160-01A-11D-A122-09	UCEC		10	89692953	89692953	T	A	NM_000314.8(PTEN):c.437T>A (p.Leu146Ter)	Pathogenic	germline
PTEN	10	89692905	89692905	G	C	TCGA-D1-A169-01A-11D-A12J-09	UCEC		10	89692905	89692905	G	C	NM_000314.8(PTEN):c.389G>C (p.Arg130Pro)	Pathogenic	germline/somatic
PTEN	10	89717672	89717672	C	T	TCGA-D1-A16B-01A-11D-A12J-09	UCEC		10	89717672	89717672	C	T	NM_000314.8(PTEN):c.697C>T (p.Arg233Ter)	Pathogenic	germline/somatic
PTEN	10	89717672	89717672	C	T	TCGA-D1-A16D-01A-11D-A12J-09	UCEC		10	89717672	89717672	C	T	NM_000314.8(PTEN):c.697C>T (p.Arg233Ter)	Pathogenic	germline/somatic
PTEN	10	89692883	89692883	C	G	TCGA-D1-A16E-01A-22D-A12J-09	UCEC		10	89692883	89692883	C	G	NM_000314.8(PTEN):c.367C>G (p.His123Asp)	Pathogenic	germline
PTEN	10	89692904	89692904	C	G	TCGA-D1-A16Q-01A-12D-A12J-09	UCEC		10	89692904	89692904	C	G	NM_000314.8(PTEN):c.388C>G (p.Arg130Gly)	Pathogenic	germline/somatic
PTEN	10	89692980	89692980	A	G	TCGA-D1-A16Q-01A-12D-A12J-09	UCEC		10	89692980	89692980	A	G	NM_000314.8(PTEN):c.464A>G (p.Tyr155Cys)	Pathogenic	germline
PTEN	10	89692886	89692886	T	C	TCGA-D1-A16R-01A-11D-A12J-09	UCEC		10	89692886	89692886	T	C	NM_000314.8(PTEN):c.370T>C (p.Cys124Arg)	Pathogenic	germline
PTEN	10	89711900	89711900	G	T	TCGA-D1-A16V-01A-11D-A12J-09	UCEC		10	89711900	89711900	G	T	NM_000314.8(PTEN):c.518G>T (p.Arg173Leu)	Likely pathogenic	germline/somatic
PTEN	10	89692905	89692905	G	A	TCGA-D1-A16X-01A-11D-A12J-09	UCEC		10	89692905	89692905	G	A	NM_000314.7(PTEN):c.389G>A (p.Arg130Gln)	Pathogenic	germline/somatic
PTEN	10	89711983	89711983	G	T	TCGA-D1-A16X-01A-11D-A12J-09	UCEC		10	89711983	89711983	G	T	NM_000314.8(PTEN):c.601G>T (p.Glu201Ter)	Pathogenic	germline
PTEN	10	89692775	89692775	C	T	TCGA-D1-A16Y-01A-31D-A12J-09	UCEC		10	89692775	89692775	C	T	NM_000314.8(PTEN):c.259C>T (p.Gln87Ter)	Pathogenic	germline
PTEN	10	89692905	89692905	G	A	TCGA-D1-A16Y-01A-31D-A12J-09	UCEC		10	89692905	89692905	G	A	NM_000314.7(PTEN):c.389G>A (p.Arg130Gln)	Pathogenic	germline/somatic
PTEN	10	89692902	89692902	G	T	TCGA-D1-A176-01A-11D-A12J-09	UCEC		10	89692902	89692902	G	T	NM_000314.8(PTEN):c.386G>T (p.Gly129Val)	Pathogenic	germline
PTEN	10	89692905	89692905	G	A	TCGA-D1-A177-01A-21D-A12J-09	UCEC		10	89692905	89692905	G	A	NM_000314.7(PTEN):c.389G>A (p.Arg130Gln)	Pathogenic	germline/somatic
PTEN	10	89692985	89692985	G	T	TCGA-D1-A177-01A-21D-A12J-09	UCEC		10	89692985	89692985	G	T	NM_000314.8(PTEN):c.469G>T (p.Glu157Ter)	Pathogenic	germline
PTEN	10	89717672	89717672	C	T	TCGA-D1-A17A-01A-11D-A12J-09	UCEC		10	89717672	89717672	C	T	NM_000314.8(PTEN):c.697C>T (p.Arg233Ter)	Pathogenic	germline/somatic
PTEN	10	89624274	89624274	T	G	TCGA-D1-A17B-01A-22D-A12J-09	UCEC		10	89624274	89624274	T	G	NM_000314.8(PTEN):c.48T>G (p.Tyr16Ter)	Pathogenic	germline
PTEN	10	89692904	89692904	C	G	TCGA-D1-A17C-01A-11D-A12J-09	UCEC		10	89692904	89692904	C	G	NM_000314.8(PTEN):c.388C>G (p.Arg130Gly)	Pathogenic	germline/somatic
PTEN	10	89692904	89692904	C	G	TCGA-D1-A17D-01A-12D-A12J-09	UCEC		10	89692904	89692904	C	G	NM_000314.8(PTEN):c.388C>G (p.Arg130Gly)	Pathogenic	germline/somatic
PTEN	10	89717695	89717695	C	G	TCGA-D1-A17D-01A-12D-A12J-09	UCEC		10	89717695	89717695	C	G	NM_000314.8(PTEN):c.720C>G (p.Tyr240Ter)	Pathogenic	germline
PTEN	10	89692904	89692904	C	G	TCGA-D1-A17L-01A-11D-A12J-09	UCEC		10	89692904	89692904	C	G	NM_000314.8(PTEN):c.388C>G (p.Arg130Gly)	Pathogenic	germline/somatic
PTEN	10	89717672	89717672	C	T	TCGA-D1-A17M-01A-21D-A12J-09	UCEC		10	89717672	89717672	C	T	NM_000314.8(PTEN):c.697C>T (p.Arg233Ter)	Pathogenic	germline/somatic
PTEN	10	89624245	89624245	G	T	TCGA-D1-A17Q-01A-11D-A12J-09	UCEC		10	89624245	89624245	G	T	NM_000314.8(PTEN):c.19G>T (p.Glu7Ter)	Likely pathogenic	germline
PTEN	10	89624270	89624270	G	A	TCGA-D1-A17Q-01A-11D-A12J-09	UCEC		10	89624270	89624270	G	A	NM_000314.8(PTEN):c.44G>A (p.Arg15Lys)	Likely pathogenic	germline
PTEN	10	89690802	89690802	G	A	TCGA-D1-A17R-01A-11D-A12J-09	UCEC		10	89690802	89690802	G	A	NM_000314.8(PTEN):c.210-1G>A	Pathogenic	germline
PTEN	10	89692904	89692904	C	G	TCGA-D1-A17T-01A-11D-A12J-09	UCEC		10	89692904	89692904	C	G	NM_000314.8(PTEN):c.388C>G (p.Arg130Gly)	Pathogenic	germline/somatic
PTEN	10	89712017	89712017	G	A	TCGA-D1-A17U-01A-21D-A12J-09	UCEC		10	89712017	89712017	G	A	NM_000314.8(PTEN):c.634+1G>A	Pathogenic/Likely pathogenic	germline
PTEN	10	89692904	89692904	C	T	TCGA-D1-A1O5-01A-11D-A14G-09	UCEC		10	89692904	89692904	C	T	NM_000314.8(PTEN):c.388C>T (p.Arg130Ter)	Pathogenic	germline/somatic
PTEN	10	89692911	89692911	G	A	TCGA-D1-A1O8-01A-11D-A14G-09	UCEC		10	89692911	89692911	G	A	NM_000314.8(PTEN):c.395G>A (p.Gly132Asp)	Likely pathogenic	germline
PTEN	10	89692886	89692886	T	A	TCGA-D1-A2G5-01A-11D-A17D-09	UCEC		10	89692886	89692886	T	A	NM_000314.8(PTEN):c.370T>A (p.Cys124Ser)	Likely pathogenic	germline
PTEN	10	89720741	89720741	C	T	TCGA-D3-A2JK-06A-11D-A196-08	SKCM		10	89720741	89720741	C	T	NM_000314.8(PTEN):c.892C>T (p.Gln298Ter)	Pathogenic	germline
PTEN	10	89692922	89692922	T	C	TCGA-D3-A3C6-06A-12D-A196-08	SKCM		10	89692922	89692922	T	C	NM_000314.8(PTEN):c.406T>C (p.Cys136Arg)	Pathogenic	germline/somatic
PTEN	10	89720741	89720741	C	T	TCGA-D3-A3MR-06A-11D-A21A-08	SKCM		10	89720741	89720741	C	T	NM_000314.8(PTEN):c.892C>T (p.Gln298Ter)	Pathogenic	germline
PTEN	10	89653781	89653781	G	C	TCGA-D6-A6ES-01A-12D-A31L-08	HNSC		10	89653781	89653781	G	C	NM_000314.8(PTEN):c.80-1G>C	Likely pathogenic	germline
PTEN	10	89692886	89692886	T	G	TCGA-D8-A1J8-01A-11D-A13L-09	BRCA		10	89692886	89692886	T	G	NM_000314.8(PTEN):c.370T>G (p.Cys124Gly)	Likely pathogenic	germline
PTEN	10	89720875	89720875	G	T	TCGA-DD-AAD0-01A-11D-A40R-10	LIHC		10	89720875	89720875	G	T	NM_000314.8(PTEN):c.1026G>T (p.Lys342Asn)	Likely pathogenic	germline
PTEN	10	89692905	89692905	G	A	TCGA-DF-A2KU-01A-11D-A17W-09	UCEC		10	89692905	89692905	G	A	NM_000314.7(PTEN):c.389G>A (p.Arg130Gln)	Pathogenic	germline/somatic
PTEN	10	89624245	89624245	G	T	TCGA-DF-A2KV-01A-11D-A17W-09	UCEC		10	89624245	89624245	G	T	NM_000314.8(PTEN):c.19G>T (p.Glu7Ter)	Likely pathogenic	germline
PTEN	10	89717629	89717629	C	A	TCGA-DF-A2KV-01A-11D-A17W-09	UCEC		10	89717629	89717629	C	A	NM_000314.8(PTEN):c.654C>A (p.Cys218Ter)	Pathogenic	germline
PTEN	10	89692904	89692904	C	G	TCGA-DI-A1C3-01A-41D-A135-09	UCEC		10	89692904	89692904	C	G	NM_000314.8(PTEN):c.388C>G (p.Arg130Gly)	Pathogenic	germline/somatic
PTEN	10	89720744	89720744	G	T	TCGA-DM-A28C-01A-11D-A16V-10	COAD		10	89720744	89720744	G	T	NM_000314.8(PTEN):c.895G>T (p.Glu299Ter)	Pathogenic	germline
PTEN	10	89692830	89692830	G	A	TCGA-DU-7290-01A-11D-2024-08	LGG		10	89692830	89692830	G	A	NM_000314.8(PTEN):c.314G>A (p.Cys105Tyr)	Likely pathogenic	germline
PTEN	10	89692904	89692904	C	T	TCGA-DU-8161-01A-11D-2253-08	LGG		10	89692904	89692904	C	T	NM_000314.8(PTEN):c.388C>T (p.Arg130Ter)	Pathogenic	germline/somatic
PTEN	10	89711910	89711910	T	G	TCGA-DV-5568-01A-01D-1534-10	KIRC		10	89711910	89711910	T	G	NM_000314.8(PTEN):c.528T>G (p.Tyr176Ter)	Likely pathogenic	unknown
PTEN	10	89653806	89653806	T	C	TCGA-E6-A1LX-01A-11D-A14G-09	UCEC		10	89653806	89653806	T	C	NM_000314.8(PTEN):c.104T>C (p.Met35Thr)	Likely pathogenic	germline
PTEN	10	89692905	89692905	G	A	TCGA-E6-A1LX-01A-11D-A14G-09	UCEC		10	89692905	89692905	G	A	NM_000314.7(PTEN):c.389G>A (p.Arg130Gln)	Pathogenic	germline/somatic
PTEN	10	89711899	89711899	C	T	TCGA-E6-A1LX-01A-11D-A14G-09	UCEC		10	89711899	89711899	C	T	NM_000314.8(PTEN):c.517C>T (p.Arg173Cys)	Pathogenic	germline/somatic
PTEN	10	89624245	89624245	G	T	TCGA-E6-A1M0-01A-11D-A142-09	UCEC		10	89624245	89624245	G	T	NM_000314.8(PTEN):c.19G>T (p.Glu7Ter)	Likely pathogenic	germline
PTEN	10	89720744	89720744	G	T	TCGA-E6-A1M0-01A-11D-A142-09	UCEC		10	89720744	89720744	G	T	NM_000314.8(PTEN):c.895G>T (p.Glu299Ter)	Pathogenic	germline
PTEN	10	89717672	89717672	C	T	TCGA-EA-A5FO-01A-21D-A28B-09	CESC		10	89717672	89717672	C	T	NM_000314.8(PTEN):c.697C>T (p.Arg233Ter)	Pathogenic	germline/somatic
PTEN	10	89690801	89690801	A	G	TCGA-EB-A44P-01A-11D-A25O-08	SKCM		10	89690801	89690801	A	G	NM_000314.8(PTEN):c.210-2A>G	Likely pathogenic	germline/somatic
PTEN	10	89711913	89711913	T	G	TCGA-EC-A1QX-01A-31D-A16D-09	UCEC		10	89711913	89711913	T	G	NM_000314.8(PTEN):c.531T>G (p.Tyr177Ter)	Pathogenic	germline
PTEN	10	89692904	89692904	C	T	TCGA-EC-A24G-01A-11D-A16D-09	UCEC		10	89692904	89692904	C	T	NM_000314.8(PTEN):c.388C>T (p.Arg130Ter)	Pathogenic	germline/somatic
PTEN	10	89717741	89717741	G	T	TCGA-EE-A2GN-06A-11D-A196-08	SKCM		10	89717741	89717741	G	T	NM_000314.8(PTEN):c.766G>T (p.Glu256Ter)	Pathogenic	germline
PTEN	10	89692905	89692905	G	T	TCGA-EE-A2GS-06A-12D-A197-08	SKCM		10	89692905	89692905	G	T	NM_000314.8(PTEN):c.389G>T	Pathogenic/Likely pathogenic	germline/somatic
PTEN	10	89720876	89720876	G	C	TCGA-EE-A2GU-06A-11D-A196-08	SKCM		10	89720876	89720876	G	C	NM_000314.8(PTEN):c.1026+1G>C	Pathogenic	germline/somatic
PTEN	10	89692905	89692905	G	A	TCGA-EI-6917-01A-11D-1924-10	READ		10	89692905	89692905	G	A	NM_000314.7(PTEN):c.389G>A (p.Arg130Gln)	Pathogenic	germline/somatic
PTEN	10	89720744	89720744	G	T	TCGA-EI-6917-01A-11D-1924-10	READ		10	89720744	89720744	G	T	NM_000314.8(PTEN):c.895G>T (p.Glu299Ter)	Pathogenic	germline
PTEN	10	89653846	89653846	C	A	TCGA-EJ-A65D-01A-11D-A30E-08	PRAD		10	89653846	89653846	C	A	NM_000314.8(PTEN):c.144C>A (p.Asn48Lys)	Pathogenic/Likely pathogenic	germline
PTEN	10	89717672	89717672	C	T	TCGA-EO-A1Y7-01A-11D-A159-09	UCEC		10	89717672	89717672	C	T	NM_000314.8(PTEN):c.697C>T (p.Arg233Ter)	Pathogenic	germline/somatic
PTEN	10	89624245	89624245	G	T	TCGA-EO-A22R-01A-11D-A18P-09	UCEC		10	89624245	89624245	G	T	NM_000314.8(PTEN):c.19G>T (p.Glu7Ter)	Likely pathogenic	germline
PTEN	10	89711899	89711899	C	T	TCGA-EO-A22U-01A-11D-A17W-09	UCEC		10	89711899	89711899	C	T	NM_000314.8(PTEN):c.517C>T (p.Arg173Cys)	Pathogenic	germline/somatic
PTEN	10	89720744	89720744	G	T	TCGA-EO-A22U-01A-11D-A17W-09	UCEC		10	89720744	89720744	G	T	NM_000314.8(PTEN):c.895G>T (p.Glu299Ter)	Pathogenic	germline
PTEN	10	89624297	89624297	A	G	TCGA-EO-A22X-01A-11D-A17W-09	UCEC		10	89624297	89624297	A	G	NM_000314.8(PTEN):c.71A>G (p.Asp24Gly)	Pathogenic/Likely pathogenic	germline
PTEN	10	89692905	89692905	G	A	TCGA-EO-A22X-01A-11D-A17W-09	UCEC		10	89692905	89692905	G	A	NM_000314.7(PTEN):c.389G>A (p.Arg130Gln)	Pathogenic	germline/somatic
PTEN	10	89692800	89692800	C	T	TCGA-EO-A22Y-01A-11D-A17W-09	UCEC		10	89692800	89692800	C	T	NM_000314.8(PTEN):c.284C>T (p.Pro95Leu)	Pathogenic	germline
PTEN	10	89692904	89692904	C	G	TCGA-EO-A3AU-01A-21D-A19Y-09	UCEC		10	89692904	89692904	C	G	NM_000314.8(PTEN):c.388C>G (p.Arg130Gly)	Pathogenic	germline/somatic
PTEN	10	89624245	89624245	G	T	TCGA-EO-A3AV-01A-12D-A19Y-09	UCEC		10	89624245	89624245	G	T	NM_000314.8(PTEN):c.19G>T (p.Glu7Ter)	Likely pathogenic	germline
PTEN	10	89720744	89720744	G	T	TCGA-EO-A3AY-01A-12D-A19Y-09	UCEC		10	89720744	89720744	G	T	NM_000314.8(PTEN):c.895G>T (p.Glu299Ter)	Pathogenic	germline
PTEN	10	89624245	89624245	G	T	TCGA-EO-A3B0-01A-12D-A19Y-09	UCEC		10	89624245	89624245	G	T	NM_000314.8(PTEN):c.19G>T (p.Glu7Ter)	Likely pathogenic	germline
PTEN	10	89692905	89692905	G	A	TCGA-EO-A3B0-01A-12D-A19Y-09	UCEC		10	89692905	89692905	G	A	NM_000314.7(PTEN):c.389G>A (p.Arg130Gln)	Pathogenic	germline/somatic
PTEN	10	89717708	89717708	C	T	TCGA-EO-A3KX-01A-11D-A228-09	UCEC		10	89717708	89717708	C	T	NM_000314.8(PTEN):c.733C>T (p.Gln245Ter)	Pathogenic	germline
PTEN	10	89692904	89692904	C	G	TCGA-EO-A3L0-01A-11D-A228-09	UCEC		10	89692904	89692904	C	G	NM_000314.8(PTEN):c.388C>G (p.Arg130Gly)	Pathogenic	germline/somatic
PTEN	10	89717607	89717607	C	G	TCGA-ER-A19M-06A-61D-A23B-08	SKCM		10	89717607	89717607	C	G	NM_000314.8(PTEN):c.635-3C>G	Likely pathogenic	germline/somatic
PTEN	10	89717672	89717672	C	T	TCGA-EY-A1G7-01A-11D-A13L-09	UCEC		10	89717672	89717672	C	T	NM_000314.8(PTEN):c.697C>T (p.Arg233Ter)	Pathogenic	germline/somatic
PTEN	10	89692904	89692904	C	G	TCGA-EY-A1GE-01A-11D-A13L-09	UCEC		10	89692904	89692904	C	G	NM_000314.8(PTEN):c.388C>G (p.Arg130Gly)	Pathogenic	germline/somatic
PTEN	10	89692905	89692905	G	A	TCGA-EY-A1GF-01A-11D-A13L-09	UCEC		10	89692905	89692905	G	A	NM_000314.7(PTEN):c.389G>A (p.Arg130Gln)	Pathogenic	germline/somatic
PTEN	10	89692904	89692904	C	G	TCGA-EY-A1GH-01A-11D-A13L-09	UCEC		10	89692904	89692904	C	G	NM_000314.8(PTEN):c.388C>G (p.Arg130Gly)	Pathogenic	germline/somatic
PTEN	10	89711913	89711913	T	G	TCGA-EY-A1GI-01A-11D-A13L-09	UCEC		10	89711913	89711913	T	G	NM_000314.8(PTEN):c.531T>G (p.Tyr177Ter)	Pathogenic	germline
PTEN	10	89692904	89692904	C	G	TCGA-EY-A1GK-01A-11D-A13L-09	UCEC		10	89692904	89692904	C	G	NM_000314.8(PTEN):c.388C>G (p.Arg130Gly)	Pathogenic	germline/somatic
PTEN	10	89692922	89692922	T	C	TCGA-EY-A1GQ-01A-21D-A13L-09	UCEC		10	89692922	89692922	T	C	NM_000314.8(PTEN):c.406T>C (p.Cys136Arg)	Pathogenic	germline/somatic
PTEN	10	89692904	89692904	C	G	TCGA-EY-A1GT-01A-11D-A13L-09	UCEC		10	89692904	89692904	C	G	NM_000314.8(PTEN):c.388C>G (p.Arg130Gly)	Pathogenic	germline/somatic
PTEN	10	89692961	89692961	C	T	TCGA-EY-A1GT-01A-11D-A13L-09	UCEC		10	89692961	89692961	C	T	NM_000314.8(PTEN):c.445C>T (p.Gln149Ter)	Pathogenic	germline
PTEN	10	89653833	89653833	G	A	TCGA-EY-A1GU-01A-11D-A13L-09	UCEC		10	89653833	89653833	G	A	NM_000314.8(PTEN):c.131G>A (p.Gly44Asp)	Pathogenic	germline
PTEN	10	89720671	89720671	G	A	TCGA-EY-A1GX-01A-12D-A13L-09	UCEC		10	89720671	89720671	G	A	NM_000314.8(PTEN):c.822G>A (p.Trp274Ter)	Pathogenic	germline
PTEN	10	89711987	89711987	C	T	TCGA-EY-A215-01A-11D-A14K-09	UCEC		10	89711987	89711987	C	T	NM_000314.8(PTEN):c.605C>T (p.Thr202Ile)	Pathogenic	germline
PTEN	10	89692904	89692904	C	G	TCGA-EY-A2OM-01A-11D-A18P-09	UCEC		10	89692904	89692904	C	G	NM_000314.8(PTEN):c.388C>G (p.Arg130Gly)	Pathogenic	germline/somatic
PTEN	10	89685300	89685300	C	G	TCGA-EY-A5W2-01A-11D-A31U-09	UCEC		10	89685300	89685300	C	G	NM_000314.8(PTEN):c.195C>G (p.Tyr65Ter)	Pathogenic	germline
PTEN	10	89717609	89717609	G	T	TCGA-F4-6807-01A-11D-1835-10	COAD		10	89717609	89717609	G	T	NM_000314.8(PTEN):c.635-1G>T	Pathogenic/Likely pathogenic	germline
PTEN	10	89624245	89624245	G	T	TCGA-F5-6814-01A-31D-1924-10	READ		10	89624245	89624245	G	T	NM_000314.8(PTEN):c.19G>T (p.Glu7Ter)	Likely pathogenic	germline
PTEN	10	89720744	89720744	G	T	TCGA-F5-6814-01A-31D-1924-10	READ		10	89720744	89720744	G	T	NM_000314.8(PTEN):c.895G>T (p.Glu299Ter)	Pathogenic	germline
PTEN	10	89692904	89692904	C	T	TCGA-FI-A2D4-01A-12D-A17D-09	UCEC		10	89692904	89692904	C	T	NM_000314.8(PTEN):c.388C>T (p.Arg130Ter)	Pathogenic	germline/somatic
PTEN	10	89653829	89653829	G	T	TCGA-FI-A2D5-01A-11D-A17D-09	UCEC		10	89653829	89653829	G	T	NM_000314.8(PTEN):c.127G>T (p.Glu43Ter)	Pathogenic	germline
PTEN	10	89711899	89711899	C	T	TCGA-FI-A2D5-01A-11D-A17D-09	UCEC		10	89711899	89711899	C	T	NM_000314.8(PTEN):c.517C>T (p.Arg173Cys)	Pathogenic	germline/somatic
PTEN	10	89692904	89692904	C	T	TCGA-FI-A2D6-01A-11D-A17D-09	UCEC		10	89692904	89692904	C	T	NM_000314.8(PTEN):c.388C>T (p.Arg130Ter)	Pathogenic	germline/somatic
PTEN	10	89692794	89692794	A	G	TCGA-FJ-A871-01A-11D-A34U-08	BLCA		10	89692794	89692794	A	G	NM_000314.8(PTEN):c.278A>G (p.His93Arg)	Pathogenic	germline
PTEN	10	89725043	89725043	G	A	TCGA-FJ-A871-01A-11D-A34U-08	BLCA		10	89725043	89725043	G	A	NM_000314.8(PTEN):c.1027-1G>A	Pathogenic	germline/somatic
PTEN	10	89717672	89717672	C	T	TCGA-FP-A4BE-01A-12D-A24D-08	STAD		10	89717672	89717672	C	T	NM_000314.8(PTEN):c.697C>T (p.Arg233Ter)	Pathogenic	germline/somatic
PTEN	10	89692839	89692839	T	C	TCGA-FS-A1ZD-06A-11D-A197-08	SKCM		10	89692839	89692839	T	C	NM_000314.8(PTEN):c.323T>C (p.Leu108Pro)	Pathogenic/Likely pathogenic	germline
PTEN	10	89717609	89717609	G	A	TCGA-FU-A23K-01A-11D-A16O-08	CESC		10	89717609	89717609	G	A	NM_000314.8(PTEN):c.635-1G>A	Pathogenic	germline
PTEN	10	89692905	89692905	G	A	TCGA-FU-A3HZ-01A-11D-A20U-09	CESC		10	89692905	89692905	G	A	NM_000314.7(PTEN):c.389G>A (p.Arg130Gln)	Pathogenic	germline/somatic
PTEN	10	89717708	89717708	C	T	TCGA-G2-A2EL-01A-12D-A18F-08	BLCA		10	89717708	89717708	C	T	NM_000314.8(PTEN):c.733C>T (p.Gln245Ter)	Pathogenic	germline
PTEN	10	89717609	89717609	G	A	TCGA-G4-6323-01A-11D-1719-10	COAD		10	89717609	89717609	G	A	NM_000314.8(PTEN):c.635-1G>A	Pathogenic	germline
PTEN	10	89692775	89692775	C	T	TCGA-GN-A4U8-06A-11D-A32N-08	SKCM		10	89692775	89692775	C	T	NM_000314.8(PTEN):c.259C>T (p.Gln87Ter)	Pathogenic	germline
PTEN	10	89717615	89717615	C	T	TCGA-GV-A40E-01A-12D-A23M-08	BLCA		10	89717615	89717615	C	T	NM_000314.8(PTEN):c.640C>T (p.Gln214Ter)	Pathogenic	germline
PTEN	10	89692849	89692849	G	A	TCGA-HC-7230-01A-11D-2114-08	PRAD		10	89692849	89692849	G	A	NM_000314.8(PTEN):c.333G>A (p.Trp111Ter)	Pathogenic	germline
PTEN	10	89690847	89690847	G	T	TCGA-JW-A5VH-01A-11D-A28B-09	CESC		10	89690847	89690847	G	T	NM_000314.8(PTEN):c.253+1G>T	Pathogenic	germline
PTEN	10	89692911	89692911	G	T	TCGA-KK-A8I6-01A-11D-A364-08	PRAD		10	89692911	89692911	G	T	NM_000314.8(PTEN):c.395G>T (p.Gly132Val)	Pathogenic/Likely pathogenic	germline
PTEN	10	89693003	89693003	A	T	TCGA-KO-8408-01A-11D-2310-10	KICH		10	89693003	89693003	A	T	NM_000314.8(PTEN):c.487A>T (p.Lys163Ter)	Likely pathogenic	germline
PTEN	10	89711913	89711913	T	G	TCGA-KQ-A41R-01A-21D-A34U-08	BLCA		10	89711913	89711913	T	G	NM_000314.8(PTEN):c.531T>G (p.Tyr177Ter)	Pathogenic	germline
PTEN	10	89692904	89692904	C	T	TCGA-LN-A4MQ-01A-11D-A28B-09	ESCA		10	89692904	89692904	C	T	NM_000314.8(PTEN):c.388C>T (p.Arg130Ter)	Pathogenic	germline/somatic
PTEN	10	89720741	89720741	C	T	TCGA-LT-A5Z6-01A-11D-A289-08	BLCA		10	89720741	89720741	C	T	NM_000314.8(PTEN):c.892C>T (p.Gln298Ter)	Pathogenic	germline
PTEN	10	89720877	89720877	T	G	TCGA-N5-A4RF-01A-11D-A28R-08	UCS		10	89720877	89720877	T	G	NM_000314.8(PTEN):c.1026+2T>G	Pathogenic/Likely pathogenic	germline/somatic
PTEN	10	89692980	89692980	A	G	TCGA-N6-A4VD-01A-11D-A28R-08	UCS		10	89692980	89692980	A	G	NM_000314.8(PTEN):c.464A>G (p.Tyr155Cys)	Pathogenic	germline
PTEN	10	89692904	89692904	C	G	TCGA-N6-A4VF-01A-31D-A28R-08	UCS		10	89692904	89692904	C	G	NM_000314.8(PTEN):c.388C>G (p.Arg130Gly)	Pathogenic	germline/somatic
PTEN	10	89692910	89692910	G	A	TCGA-N7-A4Y0-01A-12D-A28R-08	UCS		10	89692910	89692910	G	A	NM_000314.8(PTEN):c.394G>A (p.Gly132Ser)	Likely pathogenic	germline
PTEN	10	89692904	89692904	C	T	TCGA-N8-A4PI-01A-21D-A28R-08	UCS		10	89692904	89692904	C	T	NM_000314.8(PTEN):c.388C>T (p.Arg130Ter)	Pathogenic	germline/somatic
PTEN	10	89717672	89717672	C	T	TCGA-NA-A4R1-01A-11D-A28R-08	UCS		10	89717672	89717672	C	T	NM_000314.8(PTEN):c.697C>T (p.Arg233Ter)	Pathogenic	germline/somatic
PTEN	10	89717708	89717708	C	T	TCGA-NC-A5HI-01A-11D-A26M-08	LUSC		10	89717708	89717708	C	T	NM_000314.8(PTEN):c.733C>T (p.Gln245Ter)	Pathogenic	germline
PTEN	10	89692905	89692905	G	A	TCGA-ND-A4WC-01A-21D-A28R-08	UCS		10	89692905	89692905	G	A	NM_000314.7(PTEN):c.389G>A (p.Arg130Gln)	Pathogenic	germline/somatic
PTEN	10	89711983	89711983	G	T	TCGA-ND-A4WC-01A-21D-A28R-08	UCS		10	89711983	89711983	G	T	NM_000314.8(PTEN):c.601G>T (p.Glu201Ter)	Pathogenic	germline
PTEN	10	89720671	89720671	G	A	TCGA-OD-A75X-06A-12D-A32N-08	SKCM		10	89720671	89720671	G	A	NM_000314.8(PTEN):c.822G>A (p.Trp274Ter)	Pathogenic	germline
PTEN	10	89717672	89717672	C	T	TCGA-PG-A6IB-01A-21D-A31U-09	UCEC		10	89717672	89717672	C	T	NM_000314.8(PTEN):c.697C>T (p.Arg233Ter)	Pathogenic	germline/somatic
PTEN	10	89692905	89692905	G	A	TCGA-Q1-A6DW-01A-11D-A32I-09	CESC		10	89692905	89692905	G	A	NM_000314.7(PTEN):c.389G>A (p.Arg130Gln)	Pathogenic	germline/somatic
PTEN	10	89692905	89692905	G	A	TCGA-QF-A5YS-01A-11D-A31U-09	UCEC		10	89692905	89692905	G	A	NM_000314.7(PTEN):c.389G>A (p.Arg130Gln)	Pathogenic	germline/somatic
PTEN	10	89624271	89624271	A	C	TCGA-QG-A5YW-01A-11D-A28G-10	COAD		10	89624271	89624271	A	C	NM_000314.8(PTEN):c.45A>C (p.Arg15Ser)	Pathogenic/Likely pathogenic	germline
PTEN	10	89720852	89720852	C	T	TCGA-QH-A6CX-01A-11D-A32B-08	LGG		10	89720852	89720852	C	T	NM_000314.8(PTEN):c.1003C>T (p.Arg335Ter)	Pathogenic	germline/somatic
PTEN	10	89720852	89720852	C	T	TCGA-QK-A6VB-01A-12D-A34J-08	HNSC		10	89720852	89720852	C	T	NM_000314.8(PTEN):c.1003C>T (p.Arg335Ter)	Pathogenic	germline/somatic
PTEN	10	89624275	89624275	C	T	TCGA-QM-A5NM-01A-11D-A28R-08	UCS		10	89624275	89624275	C	T	NM_000314.8(PTEN):c.49C>T (p.Gln17Ter)	Pathogenic	germline
PTEN	10	89624245	89624245	G	T	TCGA-QS-A5YQ-01A-11D-A31U-09	UCEC		10	89624245	89624245	G	T	NM_000314.8(PTEN):c.19G>T (p.Glu7Ter)	Likely pathogenic	germline
PTEN	10	89720744	89720744	G	T	TCGA-QS-A5YQ-01A-11D-A31U-09	UCEC		10	89720744	89720744	G	T	NM_000314.8(PTEN):c.895G>T (p.Glu299Ter)	Pathogenic	germline
PTEN	10	89711874	89711874	G	A	TCGA-R5-A805-01A-11D-A364-08	STAD		10	89711874	89711874	G	A	NM_000314.8(PTEN):c.493-1G>A	Pathogenic/Likely pathogenic	germline
PTEN	10	89692961	89692961	C	T	TCGA-S3-A6ZH-01A-22D-A32I-09	BRCA		10	89692961	89692961	C	T	NM_000314.8(PTEN):c.445C>T (p.Gln149Ter)	Pathogenic	germline
PTEN	10	89690821	89690821	T	G	TCGA-S3-AA11-01A-31D-A41F-09	BRCA		10	89690821	89690821	T	G	NM_000314.8(PTEN):c.228T>G (p.Tyr76Ter)	Pathogenic	germline
PTEN	10	89717661	89717661	C	G	TCGA-S9-A6TW-01A-12D-A32B-08	LGG		10	89717661	89717661	C	G	NM_000314.8(PTEN):c.686C>G (p.Ser229Ter)	Pathogenic	germline
PTEN	10	89693009	89693009	G	A	TCGA-SJ-A6ZJ-01A-12D-A34Q-09	UCEC		10	89693009	89693009	G	A	NM_000314.8(PTEN):c.492+1G>A	Pathogenic	germline/somatic
PTEN	10	89720699	89720699	G	T	TCGA-SJ-A6ZJ-01A-12D-A34Q-09	UCEC		10	89720699	89720699	G	T	NM_000314.8(PTEN):c.850G>T (p.Glu284Ter)	Pathogenic	germline
PTEN	10	89720741	89720741	C	T	TCGA-SJ-A6ZJ-01A-12D-A34Q-09	UCEC		10	89720741	89720741	C	T	NM_000314.8(PTEN):c.892C>T (p.Gln298Ter)	Pathogenic	germline
PTEN	10	89692904	89692904	C	T	TCGA-T2-A6X0-01A-11D-A34J-08	HNSC		10	89692904	89692904	C	T	NM_000314.8(PTEN):c.388C>T (p.Arg130Ter)	Pathogenic	germline/somatic
PTEN	10	89717741	89717741	G	T	TCGA-TQ-A7RP-01A-21D-A34A-08	LGG		10	89717741	89717741	G	T	NM_000314.8(PTEN):c.766G>T (p.Glu256Ter)	Pathogenic	germline
PTEN	10	89692922	89692922	T	C	TCGA-UF-A7JF-01A-11D-A34J-08	HNSC		10	89692922	89692922	T	C	NM_000314.8(PTEN):c.406T>C (p.Cys136Arg)	Pathogenic	germline/somatic
PTEN	10	89692851	89692851	T	C	TCGA-UY-A78L-01A-12D-A339-08	BLCA		10	89692851	89692851	T	C	NM_000314.8(PTEN):c.335T>C (p.Leu112Pro)	Pathogenic	germline
PTEN	10	89624275	89624275	C	T	TCGA-UY-A9PE-01A-11D-A38G-08	BLCA		10	89624275	89624275	C	T	NM_000314.8(PTEN):c.49C>T (p.Gln17Ter)	Pathogenic	germline
PTEN	10	89711899	89711899	C	T	TCGA-V1-A9Z9-01A-21D-A41K-08	PRAD		10	89711899	89711899	C	T	NM_000314.8(PTEN):c.517C>T (p.Arg173Cys)	Pathogenic	germline/somatic
PTEN	10	89720852	89720852	C	T	TCGA-VB-A8QN-01A-11D-A382-10	DLBC		10	89720852	89720852	C	T	NM_000314.8(PTEN):c.1003C>T (p.Arg335Ter)	Pathogenic	germline/somatic
PTEN	10	89692911	89692911	G	A	TCGA-VM-A8CD-01A-11D-A36O-08	LGG		10	89692911	89692911	G	A	NM_000314.8(PTEN):c.395G>A (p.Gly132Asp)	Likely pathogenic	germline
PTEN	10	89692902	89692902	G	A	TCGA-VS-A952-01A-11D-A387-09	CESC		10	89692902	89692902	G	A	NM_000314.8(PTEN):c.386G>A (p.Gly129Glu)	Pathogenic	germline
PTEN	10	89692905	89692905	G	T	TCGA-VS-A953-01A-11D-A387-09	CESC		10	89692905	89692905	G	T	NM_000314.8(PTEN):c.389G>T	Pathogenic/Likely pathogenic	germline/somatic
PTEN	10	89692904	89692904	C	T	TCGA-VS-A9UD-01A-11D-A42O-09	CESC		10	89692904	89692904	C	T	NM_000314.8(PTEN):c.388C>T (p.Arg130Ter)	Pathogenic	germline/somatic
PTEN	10	89692847	89692847	T	C	TCGA-VS-A9UJ-01A-11D-A42O-09	CESC		10	89692847	89692847	T	C	NM_000314.8(PTEN):c.331T>C (p.Trp111Arg)	Likely pathogenic	germline
PTEN	10	89692904	89692904	C	T	TCGA-VS-A9UJ-01A-11D-A42O-09	CESC		10	89692904	89692904	C	T	NM_000314.8(PTEN):c.388C>T (p.Arg130Ter)	Pathogenic	germline/somatic
PTEN	10	89717712	89717712	C	T	TCGA-W3-AA1R-06A-11D-A397-08	SKCM		10	89717712	89717712	C	T	NM_000314.8(PTEN):c.737C>T (p.Pro246Leu)	Pathogenic	germline
PTEN	10	89720876	89720876	G	A	TCGA-WE-A8ZT-06A-11D-A372-08	SKCM		10	89720876	89720876	G	A	NM_000314.8(PTEN):c.1026+1G>A	Pathogenic	germline/somatic
PTEN	10	89692905	89692905	G	A	TCGA-WK-A8Y0-01A-11D-A417-09	SARC		10	89692905	89692905	G	A	NM_000314.7(PTEN):c.389G>A (p.Arg130Gln)	Pathogenic	germline/somatic
PTEN	10	89692818	89692818	T	C	TCGA-Z4-A9VC-01A-11D-A37C-09	SARC		10	89692818	89692818	T	C	NM_000314.8(PTEN):c.302T>C (p.Ile101Thr)	Pathogenic/Likely pathogenic	germline
PTEN	10	89717708	89717708	C	T	TCGA-ZJ-AAXT-01A-11D-A42O-09	CESC		10	89717708	89717708	C	T	NM_000314.8(PTEN):c.733C>T (p.Gln245Ter)	Pathogenic	germline
PTEN	10	89717712	89717712	C	T	TCGA-ZN-A9VW-01A-11D-A39R-32	MESO		10	89717712	89717712	C	T	NM_000314.8(PTEN):c.737C>T (p.Pro246Leu)	Pathogenic	germline
RAD50	5	131953874	131953874	C	T	TCGA-A5-A1OF-01A-11D-A14G-09	UCEC		5	131953874	131953874	C	T	NM_005732.4(RAD50):c.3277C>T (p.Arg1093Ter)	Pathogenic/Likely pathogenic	germline
RAD50	5	131931411	131931411	C	T	TCGA-AP-A059-01A-21D-A122-09	UCEC		5	131931411	131931411	C	T	NM_005732.4(RAD50):c.2116C>T (p.Arg706Ter)	Pathogenic	germline
RAD50	5	131931411	131931411	C	T	TCGA-B5-A11E-01A-11D-A10M-09	UCEC		5	131931411	131931411	C	T	NM_005732.4(RAD50):c.2116C>T (p.Arg706Ter)	Pathogenic	germline
RAD50	5	131953826	131953826	C	T	TCGA-BR-4292-01A-01D-1126-08	STAD		5	131953826	131953826	C	T	NM_005732.4(RAD50):c.3229C>T (p.Arg1077Ter)	Pathogenic/Likely pathogenic	germline
RAD50	5	131931411	131931411	C	T	TCGA-D5-6928-01A-11D-1924-10	COAD		5	131931411	131931411	C	T	NM_005732.4(RAD50):c.2116C>T (p.Arg706Ter)	Pathogenic	germline
RAD50	5	131953826	131953826	C	T	TCGA-DU-6392-01A-11D-1705-08	LGG		5	131953826	131953826	C	T	NM_005732.4(RAD50):c.3229C>T (p.Arg1077Ter)	Pathogenic/Likely pathogenic	germline
RAD50	5	131953874	131953874	C	T	TCGA-EO-A22U-01A-11D-A17W-09	UCEC		5	131953874	131953874	C	T	NM_005732.4(RAD50):c.3277C>T (p.Arg1093Ter)	Pathogenic/Likely pathogenic	germline
RAD50	5	131931411	131931411	C	T	TCGA-F7-A624-01A-22D-A30E-08	HNSC		5	131931411	131931411	C	T	NM_005732.4(RAD50):c.2116C>T (p.Arg706Ter)	Pathogenic	germline
RAD50	5	131931309	131931309	C	T	TCGA-FD-A3B3-01A-12D-A202-08	BLCA		5	131931309	131931309	C	T	NM_005732.4(RAD50):c.2014C>T (p.Gln672Ter)	Pathogenic	germline
RAD50	5	131973850	131973850	C	T	TCGA-FI-A2D0-01A-11D-A17D-09	UCEC		5	131973850	131973850	C	T	NM_005732.4(RAD50):c.3553C>T (p.Arg1185Ter)	Pathogenic	germline
RAD50	5	131973895	131973895	C	T	TCGA-QQ-A8VF-01A-11D-A37C-09	SARC		5	131973895	131973895	C	T	NM_005732.4(RAD50):c.3598C>T (p.Arg1200Ter)	Pathogenic	germline
RAD51	15	41021818	41021818	C	T	TCGA-SC-A6LQ-01A-11D-A34C-32	MESO		15	41021818	41021818	C	T	NM_002875.5(RAD51):c.760C>T (p.Arg254Ter)	Pathogenic	germline
RAD51C	17	56774181	56774181	C	T	TCGA-05-4405-01A-21D-1855-08	LUAD		17	56774181	56774181	C	T	NM_058216.3(RAD51C):c.532C>T (p.Gln178Ter)	Pathogenic	germline
RAD51C	17	56774052	56774052	A	G	TCGA-86-8585-01A-11D-2393-08	LUAD		17	56774052	56774052	A	G	NM_058216.3(RAD51C):c.405-2A>G	Likely pathogenic	germline
RAD51C	17	56770150	56770150	G	A	TCGA-AP-A0LM-01A-11D-A122-09	UCEC		17	56770150	56770150	G	A	NM_058216.3(RAD51C):c.145+1G>A	Likely pathogenic	germline
RAD51C	17	56772345	56772345	G	T	TCGA-D1-A16X-01A-11D-A12J-09	UCEC		17	56772345	56772345	G	T	NM_058216.3(RAD51C):c.199G>T (p.Glu67Ter)	Pathogenic	germline
RAD51C	17	56787223	56787223	C	T	TCGA-D3-A3C3-06A-12D-A19A-08	SKCM		17	56787223	56787223	C	T	NM_058216.3(RAD51C):c.709C>T (p.Arg237Ter)	Pathogenic	germline
TP53	17	7577094	7577094	G	A	TCGA-02-0003-01A-01D-1490-08	GBM		17	7577094	7577094	G	A	NM_000546.6(TP53):c.844C>T (p.Arg282Trp)	Pathogenic/Likely pathogenic	germline/somatic
TP53	17	7577538	7577538	C	T	TCGA-02-0033-01A-01D-1490-08	GBM		17	7577538	7577538	C	T	NM_000546.6(TP53):c.743G>A (p.Arg248Gln)	Pathogenic	germline/somatic
TP53	17	7577120	7577120	C	T	TCGA-02-2483-01A-01D-1494-08	GBM		17	7577120	7577120	C	T	NM_000546.6(TP53):c.818G>A (p.Arg273His)	Pathogenic	germline/somatic
TP53	17	7577538	7577538	C	T	TCGA-02-2485-01A-01D-1494-08	GBM		17	7577538	7577538	C	T	NM_000546.6(TP53):c.743G>A (p.Arg248Gln)	Pathogenic	germline/somatic
TP53	17	7578550	7578550	G	T	TCGA-02-2485-01A-01D-1494-08	GBM		17	7578550	7578550	G	T	NM_000546.6(TP53):c.380C>A (p.Ser127Tyr)	Pathogenic	germline
TP53	17	7577058	7577058	C	A	TCGA-04-1516-01A-01D-1526-09	OV		17	7577058	7577058	C	A	NM_000546.6(TP53):c.880G>T (p.Glu294Ter)	Pathogenic	germline/somatic
TP53	17	7578235	7578235	T	C	TCGA-05-4384-01A-01D-1753-08	LUAD		17	7578235	7578235	T	C	NM_000546.6(TP53):c.614A>G (p.Tyr205Cys)	Likely pathogenic	germline/somatic
TP53	17	7578403	7578403	C	T	TCGA-05-4395-01A-01D-1265-08	LUAD		17	7578403	7578403	C	T	NM_000546.6(TP53):c.527G>A (p.Cys176Tyr)	Pathogenic	germline/somatic
TP53	17	7578406	7578406	C	T	TCGA-05-4405-01A-21D-1855-08	LUAD		17	7578406	7578406	C	T	NM_000546.6(TP53):c.524G>A (p.Arg175His)	Pathogenic	germline/somatic
TP53	17	7577096	7577096	T	A	TCGA-05-4410-01A-21D-1855-08	LUAD		17	7577096	7577096	T	A	NM_000546.6(TP53):c.842A>T (p.Asp281Val)	Pathogenic/Likely pathogenic	germline/somatic
TP53	17	7577097	7577097	C	T	TCGA-05-4427-01A-21D-1855-08	LUAD		17	7577097	7577097	C	T	NM_000546.6(TP53):c.841G>A (p.Asp281Asn)	Pathogenic	germline/somatic
TP53	17	7574003	7574003	G	A	TCGA-05-4432-01A-01D-1265-08	LUAD		17	7574003	7574003	G	A	NM_000546.6(TP53):c.1024C>T (p.Arg342Ter)	Pathogenic	germline/somatic
TP53	17	7578263	7578263	G	A	TCGA-05-4433-01A-22D-1855-08	LUAD		17	7578263	7578263	G	A	NM_000546.6(TP53):c.586C>T (p.Arg196Ter)	Pathogenic	germline/somatic
TP53	17	7579485	7579485	C	A	TCGA-05-5425-01A-02D-1625-08	LUAD		17	7579485	7579485	C	A	NM_000546.6(TP53):c.202G>T (p.Glu68Ter)	Pathogenic	germline
TP53	17	7577568	7577568	C	T	TCGA-05-5428-01A-01D-1625-08	LUAD		17	7577568	7577568	C	T	NM_000546.6(TP53):c.713G>A (p.Cys238Tyr)	Pathogenic/Likely pathogenic	germline/somatic
TP53	17	7577538	7577538	C	T	TCGA-06-0129-01A-01D-1490-08	GBM		17	7577538	7577538	C	T	NM_000546.6(TP53):c.743G>A (p.Arg248Gln)	Pathogenic	germline/somatic
TP53	17	7578457	7578457	C	T	TCGA-06-0130-01A-01D-1490-08	GBM		17	7578457	7578457	C	T	NM_000546.6(TP53):c.473G>A (p.Arg158His)	Pathogenic/Likely pathogenic	germline
TP53	17	7578457	7578457	C	T	TCGA-06-0184-01A-01D-1491-08	GBM		17	7578457	7578457	C	T	NM_000546.6(TP53):c.473G>A (p.Arg158His)	Pathogenic/Likely pathogenic	germline
TP53	17	7576927	7576927	C	T	TCGA-06-0188-01A-01D-1491-08	GBM		17	7576927	7576927	C	T	NM_000546.6(TP53):c.920-1G>A	Pathogenic/Likely pathogenic	germline/somatic
TP53	17	7578406	7578406	C	T	TCGA-06-0189-01A-01D-1491-08	GBM		17	7578406	7578406	C	T	NM_000546.6(TP53):c.524G>A (p.Arg175His)	Pathogenic	germline/somatic
TP53	17	7577548	7577548	C	T	TCGA-06-0190-01A-01D-1491-08	GBM		17	7577548	7577548	C	T	NM_000546.6(TP53):c.733G>A (p.Gly245Ser)	Pathogenic	germline/somatic
TP53	17	7577096	7577096	T	G	TCGA-06-0195-01B-01D-1491-08	GBM		17	7577096	7577096	T	G	NM_000546.6(TP53):c.842A>C (p.Asp281Ala)	Likely pathogenic	somatic
TP53	17	7577538	7577538	C	T	TCGA-06-0210-01B-01D-1491-08	GBM		17	7577538	7577538	C	T	NM_000546.6(TP53):c.743G>A (p.Arg248Gln)	Pathogenic	germline/somatic
TP53	17	7578265	7578265	A	G	TCGA-06-0237-01A-02D-1491-08	GBM		17	7578265	7578265	A	G	NM_000546.6(TP53):c.584T>C (p.Ile195Thr)	Pathogenic	germline/somatic
TP53	17	7577538	7577538	C	T	TCGA-06-0241-01A-02D-1491-08	GBM		17	7577538	7577538	C	T	NM_000546.6(TP53):c.743G>A (p.Arg248Gln)	Pathogenic	germline/somatic
TP53	17	7578190	7578190	T	C	TCGA-06-0644-01A-02D-1492-08	GBM		17	7578190	7578190	T	C	NM_000546.6(TP53):c.659A>G (p.Tyr220Cys)	Pathogenic	germline/somatic
TP53	17	7577094	7577094	G	A	TCGA-06-0875-01A-01D-1492-08	GBM		17	7577094	7577094	G	A	NM_000546.6(TP53):c.844C>T (p.Arg282Trp)	Pathogenic/Likely pathogenic	germline/somatic
TP53	17	7577539	7577539	G	A	TCGA-06-0876-01A-01D-1492-08	GBM		17	7577539	7577539	G	A	NM_000546.6(TP53):c.742C>T (p.Arg248Trp)	Pathogenic	germline/somatic
TP53	17	7578280	7578280	G	A	TCGA-06-2559-01A-01D-1494-08	GBM		17	7578280	7578280	G	A	NM_000546.6(TP53):c.569C>T (p.Pro190Leu)	Likely pathogenic	germline
TP53	17	7578541	7578541	A	G	TCGA-06-2563-01A-01D-1494-08	GBM		17	7578541	7578541	A	G	NM_000546.6(TP53):c.389T>C (p.Leu130Pro)	Pathogenic	germline
TP53	17	7578263	7578263	G	A	TCGA-06-2567-01A-01D-1494-08	GBM		17	7578263	7578263	G	A	NM_000546.6(TP53):c.586C>T (p.Arg196Ter)	Pathogenic	germline/somatic
TP53	17	7577120	7577120	C	T	TCGA-06-5408-01A-01D-1696-08	GBM		17	7577120	7577120	C	T	NM_000546.6(TP53):c.818G>A (p.Arg273His)	Pathogenic	germline/somatic
TP53	17	7578212	7578212	G	A	TCGA-06-5416-01A-01D-1486-08	GBM		17	7578212	7578212	G	A	NM_000546.6(TP53):c.637C>T (p.Arg213Ter)	Pathogenic	germline/somatic
TP53	17	7578263	7578263	G	A	TCGA-06-5417-01A-01D-1486-08	GBM		17	7578263	7578263	G	A	NM_000546.6(TP53):c.586C>T (p.Arg196Ter)	Pathogenic	germline/somatic
TP53	17	7578406	7578406	C	T	TCGA-06-5858-01A-01D-1696-08	GBM		17	7578406	7578406	C	T	NM_000546.6(TP53):c.524G>A (p.Arg175His)	Pathogenic	germline/somatic
TP53	17	7578190	7578190	T	C	TCGA-06-6389-01A-11D-1696-08	GBM		17	7578190	7578190	T	C	NM_000546.6(TP53):c.659A>G (p.Tyr220Cys)	Pathogenic	germline/somatic
TP53	17	7577568	7577568	C	A	TCGA-06-6694-01A-12D-1845-08	GBM		17	7577568	7577568	C	A	NM_000546.6(TP53):c.713G>T (p.Cys238Phe)	Pathogenic	germline/somatic
TP53	17	7578406	7578406	C	T	TCGA-06-6698-01A-11D-1845-08	GBM		17	7578406	7578406	C	T	NM_000546.6(TP53):c.524G>A (p.Arg175His)	Pathogenic	germline/somatic
TP53	17	7577096	7577096	T	G	TCGA-06-6701-01A-11D-1845-08	GBM		17	7577096	7577096	T	G	NM_000546.6(TP53):c.842A>C (p.Asp281Ala)	Likely pathogenic	somatic
TP53	17	7574003	7574003	G	A	TCGA-06-A5U0-01A-11D-A33T-08	GBM		17	7574003	7574003	G	A	NM_000546.6(TP53):c.1024C>T (p.Arg342Ter)	Pathogenic	germline/somatic
TP53	17	7577114	7577114	C	T	TCGA-06-A7TL-01A-11D-A391-08	GBM		17	7577114	7577114	C	T	NM_000546.6(TP53):c.824G>A (p.Cys275Tyr)	Pathogenic/Likely pathogenic	germline/somatic
TP53	17	7577120	7577120	C	T	TCGA-10-0934-01A-02D-0399-01	OV		17	7577120	7577120	C	T	NM_000546.6(TP53):c.818G>A (p.Arg273His)	Pathogenic	germline/somatic
TP53	17	7577538	7577538	C	T	TCGA-10-0934-01A-02D-0399-01	OV		17	7577538	7577538	C	T	NM_000546.6(TP53):c.743G>A (p.Arg248Gln)	Pathogenic	germline/somatic
TP53	17	7577568	7577568	C	T	TCGA-12-0618-01A-01D-1492-08	GBM		17	7577568	7577568	C	T	NM_000546.6(TP53):c.713G>A (p.Cys238Tyr)	Pathogenic/Likely pathogenic	germline/somatic
TP53	17	7577539	7577539	G	A	TCGA-13-1500-01A-01D-0472-01	OV		17	7577539	7577539	G	A	NM_000546.6(TP53):c.742C>T (p.Arg248Trp)	Pathogenic	germline/somatic
TP53	17	7578406	7578406	C	T	TCGA-13-2057-01A-02D-1526-09	OV		17	7578406	7578406	C	T	NM_000546.6(TP53):c.524G>A (p.Arg175His)	Pathogenic	germline/somatic
TP53	17	7578395	7578395	G	A	TCGA-13-2059-01A-01D-1526-09	OV		17	7578395	7578395	G	A	NM_000546.6(TP53):c.535C>T (p.His179Tyr)	Pathogenic/Likely pathogenic	germline/somatic
TP53	17	7578271	7578271	T	C	TCGA-13-2061-01A-01D-1526-09	OV		17	7578271	7578271	T	C	NM_000546.6(TP53):c.578A>G (p.His193Arg)	Pathogenic/Likely pathogenic	germline/somatic
TP53	17	7577120	7577120	C	T	TCGA-13-A5FU-01A-11D-A403-09	OV		17	7577120	7577120	C	T	NM_000546.6(TP53):c.818G>A (p.Arg273His)	Pathogenic	germline/somatic
TP53	17	7577548	7577548	C	T	TCGA-14-0740-01B-01D-1845-08	GBM		17	7577548	7577548	C	T	NM_000546.6(TP53):c.733G>A (p.Gly245Ser)	Pathogenic	germline/somatic
TP53	17	7577094	7577094	G	A	TCGA-14-0813-01A-01D-1492-08	GBM		17	7577094	7577094	G	A	NM_000546.6(TP53):c.844C>T (p.Arg282Trp)	Pathogenic/Likely pathogenic	germline/somatic
TP53	17	7579374	7579374	C	G	TCGA-14-1034-01A-01D-1492-08	GBM		17	7579374	7579374	C	G	NM_000546.6(TP53):c.313G>C (p.Gly105Arg)	Pathogenic/Likely pathogenic	germline
TP53	17	7578190	7578190	T	C	TCGA-14-1456-01B-01D-1494-08	GBM		17	7578190	7578190	T	C	NM_000546.6(TP53):c.659A>G (p.Tyr220Cys)	Pathogenic	germline/somatic
TP53	17	7577094	7577094	G	A	TCGA-14-1825-01A-01D-1494-08	GBM		17	7577094	7577094	G	A	NM_000546.6(TP53):c.844C>T (p.Arg282Trp)	Pathogenic/Likely pathogenic	germline/somatic
TP53	17	7578263	7578263	G	A	TCGA-14-1825-01A-01D-1494-08	GBM		17	7578263	7578263	G	A	NM_000546.6(TP53):c.586C>T (p.Arg196Ter)	Pathogenic	germline/somatic
TP53	17	7578406	7578406	C	T	TCGA-14-4157-01A-01D-1353-08	GBM		17	7578406	7578406	C	T	NM_000546.6(TP53):c.524G>A (p.Arg175His)	Pathogenic	germline/somatic
TP53	17	7578395	7578395	G	A	TCGA-16-0846-01A-01D-1492-08	GBM		17	7578395	7578395	G	A	NM_000546.6(TP53):c.535C>T (p.His179Tyr)	Pathogenic/Likely pathogenic	germline/somatic
TP53	17	7577022	7577022	G	A	TCGA-16-0848-01A-01D-1492-08	GBM		17	7577022	7577022	G	A	NM_000546.6(TP53):c.916C>T (p.Arg306Ter)	Pathogenic	germline/somatic
TP53	17	7578202	7578202	A	T	TCGA-18-3406-01A-01D-0983-08	LUSC		17	7578202	7578202	A	T	NM_000546.6(TP53):c.647T>A (p.Val216Glu)	Likely pathogenic	somatic
TP53	17	7578212	7578212	G	C	TCGA-18-3410-01A-01D-0983-08	LUSC		17	7578212	7578212	G	C	NM_000546.6(TP53):c.637C>G (p.Arg213Gly)	Likely pathogenic	somatic
TP53	17	7577046	7577046	C	A	TCGA-18-3411-01A-01D-0983-08	LUSC		17	7577046	7577046	C	A	NM_000546.6(TP53):c.892G>T (p.Glu298Ter)	Pathogenic	germline/somatic
TP53	17	7577568	7577568	C	G	TCGA-18-3412-01A-01D-0983-08	LUSC		17	7577568	7577568	C	G	NM_000546.6(TP53):c.713G>C (p.Cys238Ser)	Pathogenic/Likely pathogenic	germline/somatic
TP53	17	7577120	7577120	C	A	TCGA-18-3414-01A-01D-0983-08	LUSC		17	7577120	7577120	C	A	NM_000546.6(TP53):c.818G>T (p.Arg273Leu)	Pathogenic	germline/somatic
TP53	17	7578406	7578406	C	T	TCGA-19-1787-01B-01D-1495-08	GBM		17	7578406	7578406	C	T	NM_000546.6(TP53):c.524G>A (p.Arg175His)	Pathogenic	germline/somatic
TP53	17	7577548	7577548	C	T	TCGA-19-2623-01A-01D-1495-08	GBM		17	7577548	7577548	C	T	NM_000546.6(TP53):c.733G>A (p.Gly245Ser)	Pathogenic	germline/somatic
TP53	17	7577568	7577568	C	T	TCGA-19-2625-01A-01D-1495-08	GBM		17	7577568	7577568	C	T	NM_000546.6(TP53):c.713G>A (p.Cys238Tyr)	Pathogenic/Likely pathogenic	germline/somatic
TP53	17	7578235	7578235	T	C	TCGA-19-2625-01A-01D-1495-08	GBM		17	7578235	7578235	T	C	NM_000546.6(TP53):c.614A>G (p.Tyr205Cys)	Likely pathogenic	germline/somatic
TP53	17	7578555	7578555	C	T	TCGA-19-2629-01A-01D-1495-08	GBM		17	7578555	7578555	C	T	NM_000546.6(TP53):c.376-1G>A	Pathogenic/Likely pathogenic	germline/somatic
TP53	17	7578475	7578475	G	A	TCGA-19-4065-01A-01D-2280-08	GBM		17	7578475	7578475	G	A	NM_000546.6(TP53):c.455C>T (p.Pro152Leu)	Pathogenic	germline/somatic
TP53	17	7576865	7576865	A	C	TCGA-19-5956-01A-11D-1696-08	GBM		17	7576865	7576865	A	C	NM_000546.6(TP53):c.981T>G (p.Tyr327Ter)	Likely pathogenic	germline
TP53	17	7578275	7578275	G	A	TCGA-19-5956-01A-11D-1696-08	GBM		17	7578275	7578275	G	A	NM_000546.6(TP53):c.574C>T (p.Gln192Ter)	Pathogenic	germline
TP53	17	7577559	7577559	G	A	TCGA-20-0991-01A-03D-0428-01	OV		17	7577559	7577559	G	A	NM_000546.6(TP53):c.722C>T (p.Ser241Phe)	Likely pathogenic	germline/somatic
TP53	17	7577548	7577548	C	A	TCGA-21-1070-01A-01D-1521-08	LUSC		17	7577548	7577548	C	A	NM_000546.6(TP53):c.733G>T (p.Gly245Cys)	Pathogenic	germline/somatic
TP53	17	7578442	7578442	T	C	TCGA-21-1076-01A-02D-1521-08	LUSC		17	7578442	7578442	T	C	NM_000546.6(TP53):c.488A>G (p.Tyr163Cys)	Pathogenic	germline/somatic
TP53	17	7577547	7577547	C	A	TCGA-21-1083-01A-01D-1521-08	LUSC		17	7577547	7577547	C	A	NM_000546.6(TP53):c.734G>T (p.Gly245Val)	Pathogenic	germline/somatic
TP53	17	7579414	7579414	C	T	TCGA-21-5784-01A-01D-1632-08	LUSC		17	7579414	7579414	C	T	NM_000546.6(TP53):c.273G>A (p.Trp91Ter)	Pathogenic	germline/somatic
TP53	17	7578403	7578403	C	T	TCGA-21-5787-01A-01D-1632-08	LUSC		17	7578403	7578403	C	T	NM_000546.6(TP53):c.527G>A (p.Cys176Tyr)	Pathogenic	germline/somatic
TP53	17	7577580	7577580	T	C	TCGA-22-0944-01A-01D-1521-08	LUSC		17	7577580	7577580	T	C	NM_000546.6(TP53):c.701A>G (p.Tyr234Cys)	Pathogenic/Likely pathogenic	germline/somatic
TP53	17	7578190	7578190	T	C	TCGA-22-1016-01A-01D-1521-08	LUSC		17	7578190	7578190	T	C	NM_000546.6(TP53):c.659A>G (p.Tyr220Cys)	Pathogenic	germline/somatic
TP53	17	7577548	7577548	C	A	TCGA-22-4599-01A-01D-1441-08	LUSC		17	7577548	7577548	C	A	NM_000546.6(TP53):c.733G>T (p.Gly245Cys)	Pathogenic	germline/somatic
TP53	17	7577121	7577121	G	A	TCGA-22-4601-01A-01D-1441-08	LUSC		17	7577121	7577121	G	A	NM_000546.6(TP53):c.817C>T (p.Arg273Cys)	Pathogenic/Likely pathogenic	germline/somatic
TP53	17	7578263	7578263	G	A	TCGA-22-4604-01A-01D-1267-08	LUSC		17	7578263	7578263	G	A	NM_000546.6(TP53):c.586C>T (p.Arg196Ter)	Pathogenic	germline/somatic
TP53	17	7577018	7577018	C	A	TCGA-22-4605-01A-21D-2122-08	LUSC		17	7577018	7577018	C	A	NM_000546.6(TP53):c.919+1G>T	Likely pathogenic	germline/somatic
TP53	17	7578403	7578403	C	A	TCGA-22-4607-01A-01D-1267-08	LUSC		17	7578403	7578403	C	A	NM_000546.6(TP53):c.527G>T (p.Cys176Phe)	Likely pathogenic	germline/somatic
TP53	17	7577539	7577539	G	A	TCGA-22-5471-01A-01D-1632-08	LUSC		17	7577539	7577539	G	A	NM_000546.6(TP53):c.742C>T (p.Arg248Trp)	Pathogenic	germline/somatic
TP53	17	7577046	7577046	C	A	TCGA-22-5473-01A-01D-1632-08	LUSC		17	7577046	7577046	C	A	NM_000546.6(TP53):c.892G>T (p.Glu298Ter)	Pathogenic	germline/somatic
TP53	17	7579358	7579358	C	A	TCGA-22-5480-01A-01D-1632-08	LUSC		17	7579358	7579358	C	A	NM_000546.6(TP53):c.329G>T (p.Arg110Leu)	Pathogenic/Likely pathogenic	germline/somatic
TP53	17	7577580	7577580	T	C	TCGA-22-5481-01A-31D-1945-08	LUSC		17	7577580	7577580	T	C	NM_000546.6(TP53):c.701A>G (p.Tyr234Cys)	Pathogenic/Likely pathogenic	germline/somatic
TP53	17	7578556	7578556	T	C	TCGA-22-5482-01A-01D-1632-08	LUSC		17	7578556	7578556	T	C	NM_000546.6(TP53):c.376-2A>G	Likely pathogenic	germline/somatic
TP53	17	7576852	7576852	C	G	TCGA-22-5483-01A-01D-1817-08	LUSC		17	7576852	7576852	C	G	NM_000546.6(TP53):c.993+1G>C	Pathogenic	germline/somatic
TP53	17	7577022	7577022	G	A	TCGA-22-5489-01A-01D-1632-08	LUSC		17	7577022	7577022	G	A	NM_000546.6(TP53):c.916C>T (p.Arg306Ter)	Pathogenic	germline/somatic
TP53	17	7578478	7578478	G	C	TCGA-22-5491-01A-01D-1632-08	LUSC		17	7578478	7578478	G	C	NM_000546.6(TP53):c.452C>G (p.Pro151Arg)	Pathogenic	germline/somatic
TP53	17	7578188	7578188	C	A	TCGA-22-5492-01A-01D-1632-08	LUSC		17	7578188	7578188	C	A	NM_000546.6(TP53):c.661G>T (p.Glu221Ter)	Pathogenic	germline/somatic
TP53	17	7578403	7578403	C	T	TCGA-23-1110-01A-01D-0428-01	OV		17	7578403	7578403	C	T	NM_000546.6(TP53):c.527G>A (p.Cys176Tyr)	Pathogenic	germline/somatic
TP53	17	7578370	7578370	C	A	TCGA-23-2641-01A-01D-1526-09	OV		17	7578370	7578370	C	A	NM_000546.6(TP53):c.559+1G>T	Likely pathogenic	germline/somatic
TP53	17	7577538	7577538	C	T	TCGA-23-2643-01A-01D-1526-09	OV		17	7577538	7577538	C	T	NM_000546.6(TP53):c.743G>A (p.Arg248Gln)	Pathogenic	germline/somatic
TP53	17	7577579	7577579	G	C	TCGA-23-2649-01A-01D-1526-09	OV		17	7577579	7577579	G	C	NM_000546.6(TP53):c.702C>G (p.Tyr234Ter)	Pathogenic	germline
TP53	17	7578275	7578275	G	A	TCGA-24-1431-01A-01D-0472-01	OV		17	7578275	7578275	G	A	NM_000546.6(TP53):c.574C>T (p.Gln192Ter)	Pathogenic	germline
TP53	17	7578190	7578190	T	C	TCGA-25-1319-01A-01D-0452-01	OV		17	7578190	7578190	T	C	NM_000546.6(TP53):c.659A>G (p.Tyr220Cys)	Pathogenic	germline/somatic
TP53	17	7577121	7577121	G	A	TCGA-26-1442-01A-01D-1696-08	GBM		17	7577121	7577121	G	A	NM_000546.6(TP53):c.817C>T (p.Arg273Cys)	Pathogenic/Likely pathogenic	germline/somatic
TP53	17	7577580	7577580	T	C	TCGA-26-5133-01A-01D-1486-08	GBM		17	7577580	7577580	T	C	NM_000546.6(TP53):c.701A>G (p.Tyr234Cys)	Pathogenic/Likely pathogenic	germline/somatic
TP53	17	7577538	7577538	C	T	TCGA-27-1830-01A-01D-1494-08	GBM		17	7577538	7577538	C	T	NM_000546.6(TP53):c.743G>A (p.Arg248Gln)	Pathogenic	germline/somatic
TP53	17	7577114	7577114	C	T	TCGA-27-1838-01A-01D-1494-08	GBM		17	7577114	7577114	C	T	NM_000546.6(TP53):c.824G>A (p.Cys275Tyr)	Pathogenic/Likely pathogenic	germline/somatic
TP53	17	7577610	7577610	T	C	TCGA-27-1838-01A-01D-1494-08	GBM		17	7577610	7577610	T	C	NM_000546.6(TP53):c.673-2A>G	Pathogenic	germline/somatic
TP53	17	7577120	7577120	C	T	TCGA-28-1753-01A-01D-1494-08	GBM		17	7577120	7577120	C	T	NM_000546.6(TP53):c.818G>A (p.Arg273His)	Pathogenic	germline/somatic
TP53	17	7577556	7577556	C	T	TCGA-28-2509-01A-01D-1494-08	GBM		17	7577556	7577556	C	T	NM_000546.6(TP53):c.725G>A (p.Cys242Tyr)	Pathogenic	germline/somatic
TP53	17	7579699	7579699	C	T	TCGA-28-5219-01A-01D-1486-08	GBM		17	7579699	7579699	C	T	NM_000546.6(TP53):c.96+1G>A	Likely pathogenic	germline/somatic
TP53	17	7577141	7577141	C	T	TCGA-29-A5NZ-01A-11D-A403-09	OV		17	7577141	7577141	C	T	NM_000546.6(TP53):c.797G>A (p.Gly266Glu)	Pathogenic/Likely pathogenic	germline/somatic
TP53	17	7579592	7579592	T	C	TCGA-2A-A8VT-01A-11D-A377-08	PRAD		17	7579592	7579592	T	C	NM_000546.6(TP53):c.97-2A>G	Pathogenic	germline
TP53	17	7577547	7577547	C	T	TCGA-2F-A9KP-01A-11D-A38G-08	BLCA		17	7577547	7577547	C	T	NM_000546.6(TP53):c.734G>A (p.Gly245Asp)	Pathogenic/Likely pathogenic	germline/somatic
TP53	17	7578212	7578212	G	A	TCGA-2H-A9GH-01A-11D-A37C-09	ESCA		17	7578212	7578212	G	A	NM_000546.6(TP53):c.637C>T (p.Arg213Ter)	Pathogenic	germline/somatic
TP53	17	7578263	7578263	G	A	TCGA-2H-A9GK-01A-11D-A37C-09	ESCA		17	7578263	7578263	G	A	NM_000546.6(TP53):c.586C>T (p.Arg196Ter)	Pathogenic	germline/somatic
TP53	17	7577094	7577094	G	A	TCGA-2H-A9GQ-01A-11D-A37C-09	ESCA		17	7577094	7577094	G	A	NM_000546.6(TP53):c.844C>T (p.Arg282Trp)	Pathogenic/Likely pathogenic	germline/somatic
TP53	17	7578403	7578403	C	A	TCGA-2H-A9GR-01A-12D-A37C-09	ESCA		17	7578403	7578403	C	A	NM_000546.6(TP53):c.527G>T (p.Cys176Phe)	Likely pathogenic	germline/somatic
TP53	17	7577120	7577120	C	T	TCGA-2J-AAB6-01A-11D-A40W-08	PAAD		17	7577120	7577120	C	T	NM_000546.6(TP53):c.818G>A (p.Arg273His)	Pathogenic	germline/somatic
TP53	17	7579377	7579377	G	A	TCGA-2J-AAB9-01A-11D-A40W-08	PAAD		17	7579377	7579377	G	A	NM_000546.6(TP53):c.310C>T (p.Gln104Ter)	Pathogenic	germline/somatic
TP53	17	7577547	7577547	C	T	TCGA-2J-AABP-01A-11D-A40W-08	PAAD		17	7577547	7577547	C	T	NM_000546.6(TP53):c.734G>A (p.Gly245Asp)	Pathogenic/Likely pathogenic	germline/somatic
TP53	17	7578208	7578208	T	C	TCGA-2J-AABU-01A-11D-A40W-08	PAAD		17	7578208	7578208	T	C	NM_000546.6(TP53):c.641A>G (p.His214Arg)	Likely pathogenic	germline/somatic
TP53	17	7578406	7578406	C	T	TCGA-2L-AAQA-01A-21D-A38G-08	PAAD		17	7578406	7578406	C	T	NM_000546.6(TP53):c.524G>A (p.Arg175His)	Pathogenic	germline/somatic
TP53	17	7577141	7577141	C	T	TCGA-2L-AAQJ-01A-12D-A397-08	PAAD		17	7577141	7577141	C	T	NM_000546.6(TP53):c.797G>A (p.Gly266Glu)	Pathogenic/Likely pathogenic	germline/somatic
TP53	17	7577094	7577094	G	A	TCGA-2W-A8YY-01A-11D-A37N-09	CESC		17	7577094	7577094	G	A	NM_000546.6(TP53):c.844C>T (p.Arg282Trp)	Pathogenic/Likely pathogenic	germline/somatic
TP53	17	7578263	7578263	G	A	TCGA-2W-A8YY-01A-11D-A37N-09	CESC		17	7578263	7578263	G	A	NM_000546.6(TP53):c.586C>T (p.Arg196Ter)	Pathogenic	germline/somatic
TP53	17	7577547	7577547	C	T	TCGA-2Y-A9H8-01A-11D-A38X-10	LIHC		17	7577547	7577547	C	T	NM_000546.6(TP53):c.734G>A (p.Gly245Asp)	Pathogenic/Likely pathogenic	germline/somatic
TP53	17	7577568	7577568	C	A	TCGA-32-2491-01A-01D-1353-08	GBM		17	7577568	7577568	C	A	NM_000546.6(TP53):c.713G>T (p.Cys238Phe)	Pathogenic	germline/somatic
TP53	17	7578406	7578406	C	T	TCGA-32-2616-01A-01D-1495-08	GBM		17	7578406	7578406	C	T	NM_000546.6(TP53):c.524G>A (p.Arg175His)	Pathogenic	germline/somatic
TP53	17	7578406	7578406	C	T	TCGA-32-4208-01A-01D-1353-08	GBM		17	7578406	7578406	C	T	NM_000546.6(TP53):c.524G>A (p.Arg175His)	Pathogenic	germline/somatic
TP53	17	7577570	7577570	C	A	TCGA-33-4532-01A-01D-1267-08	LUSC		17	7577570	7577570	C	A	NM_000546.6(TP53):c.711G>T (p.Met237Ile)	Likely pathogenic	somatic
TP53	17	7577046	7577046	C	A	TCGA-33-4533-01A-01D-1267-08	LUSC		17	7577046	7577046	C	A	NM_000546.6(TP53):c.892G>T (p.Glu298Ter)	Pathogenic	germline/somatic
TP53	17	7578208	7578208	T	C	TCGA-33-4538-01A-01D-1267-08	LUSC		17	7578208	7578208	T	C	NM_000546.6(TP53):c.641A>G (p.His214Arg)	Likely pathogenic	germline/somatic
TP53	17	7578457	7578457	C	A	TCGA-33-4583-01A-01D-1441-08	LUSC		17	7578457	7578457	C	A	NM_000546.6(TP53):c.473G>T (p.Arg158Leu)	Pathogenic	germline
TP53	17	7577538	7577538	C	T	TCGA-33-4586-01A-01D-1441-08	LUSC		17	7577538	7577538	C	T	NM_000546.6(TP53):c.743G>A (p.Arg248Gln)	Pathogenic	germline/somatic
TP53	17	7577548	7577548	C	A	TCGA-33-A4WN-01A-11D-A25L-08	LUSC		17	7577548	7577548	C	A	NM_000546.6(TP53):c.733G>T (p.Gly245Cys)	Pathogenic	germline/somatic
TP53	17	7578280	7578280	G	A	TCGA-33-AAS8-01A-11D-A401-08	LUSC		17	7578280	7578280	G	A	NM_000546.6(TP53):c.569C>T (p.Pro190Leu)	Likely pathogenic	germline
TP53	17	7576928	7576928	T	C	TCGA-33-AASJ-01A-11D-A401-08	LUSC		17	7576928	7576928	T	C	NM_000546.6(TP53):c.920-2A>G	Pathogenic/Likely pathogenic	germline/somatic
TP53	17	7578407	7578407	G	C	TCGA-33-AASL-01A-11D-A401-08	LUSC		17	7578407	7578407	G	C	NM_000546.6(TP53):c.523C>G (p.Arg175Gly)	Pathogenic	germline/somatic
TP53	17	7577025	7577025	T	A	TCGA-34-2596-01A-01D-1522-08	LUSC		17	7577025	7577025	T	A	NM_000546.6(TP53):c.913A>T (p.Lys305Ter)	Pathogenic	germline
TP53	17	7578457	7578457	C	A	TCGA-34-2608-01A-02D-1522-08	LUSC		17	7578457	7578457	C	A	NM_000546.6(TP53):c.473G>T (p.Arg158Leu)	Pathogenic	germline
TP53	17	7579494	7579494	T	A	TCGA-34-2609-01A-01D-1522-08	LUSC		17	7579494	7579494	T	A	NM_000546.6(TP53):c.193A>T (p.Arg65Ter)	Pathogenic	somatic
TP53	17	7577097	7577097	C	A	TCGA-34-5232-01A-21D-1817-08	LUSC		17	7577097	7577097	C	A	NM_000546.6(TP53):c.841G>T (p.Asp281Tyr)	Pathogenic	germline/somatic
TP53	17	7579311	7579311	C	A	TCGA-34-5239-01A-21D-1817-08	LUSC		17	7579311	7579311	C	A	NM_000546.6(TP53):c.375+1G>T	Pathogenic/Likely pathogenic	germline
TP53	17	7577548	7577548	C	T	TCGA-34-5240-01A-01D-1441-08	LUSC		17	7577548	7577548	C	T	NM_000546.6(TP53):c.733G>A (p.Gly245Ser)	Pathogenic	germline/somatic
TP53	17	7578239	7578239	C	A	TCGA-34-5241-01A-01D-1441-08	LUSC		17	7578239	7578239	C	A	NM_000546.6(TP53):c.610G>T (p.Glu204Ter)	Pathogenic	somatic
TP53	17	7578382	7578382	G	C	TCGA-34-5927-01A-11D-1817-08	LUSC		17	7578382	7578382	G	C	NM_000546.6(TP53):c.548C>G (p.Ser183Ter)	Pathogenic	germline/somatic
TP53	17	7577094	7577094	G	A	TCGA-34-5929-01A-11D-1817-08	LUSC		17	7577094	7577094	G	A	NM_000546.6(TP53):c.844C>T (p.Arg282Trp)	Pathogenic/Likely pathogenic	germline/somatic
TP53	17	7578457	7578457	C	A	TCGA-34-7107-01A-11D-1945-08	LUSC		17	7578457	7578457	C	A	NM_000546.6(TP53):c.473G>T (p.Arg158Leu)	Pathogenic	germline
TP53	17	7578395	7578395	G	A	TCGA-34-8454-01A-11D-2323-08	LUSC		17	7578395	7578395	G	A	NM_000546.6(TP53):c.535C>T (p.His179Tyr)	Pathogenic/Likely pathogenic	germline/somatic
TP53	17	7578492	7578492	C	T	TCGA-35-4123-01A-01D-1105-08	LUAD		17	7578492	7578492	C	T	NM_000546.6(TP53):c.438G>A (p.Trp146Ter)	Pathogenic	germline/somatic
TP53	17	7577559	7577559	G	A	TCGA-35-5375-01A-01D-1625-08	LUAD		17	7577559	7577559	G	A	NM_000546.6(TP53):c.722C>T (p.Ser241Phe)	Likely pathogenic	germline/somatic
TP53	17	7578442	7578442	T	C	TCGA-36-2532-01A-01D-1526-09	OV		17	7578442	7578442	T	C	NM_000546.6(TP53):c.488A>G (p.Tyr163Cys)	Pathogenic	germline/somatic
TP53	17	7576855	7576855	G	A	TCGA-36-2534-01A-01D-1526-09	OV		17	7576855	7576855	G	A	NM_000546.6(TP53):c.991C>T (p.Gln331Ter)	Pathogenic	germline
TP53	17	7578370	7578370	C	A	TCGA-36-2548-01A-01D-1526-09	OV		17	7578370	7578370	C	A	NM_000546.6(TP53):c.559+1G>T	Likely pathogenic	germline/somatic
TP53	17	7578275	7578275	G	A	TCGA-36-2552-01A-01D-1526-09	OV		17	7578275	7578275	G	A	NM_000546.6(TP53):c.574C>T (p.Gln192Ter)	Pathogenic	germline
TP53	17	7577120	7577120	C	T	TCGA-37-3783-01A-01D-1267-08	LUSC		17	7577120	7577120	C	T	NM_000546.6(TP53):c.818G>A (p.Arg273His)	Pathogenic	germline/somatic
TP53	17	7579494	7579494	T	A	TCGA-37-3789-01A-01D-0983-08	LUSC		17	7579494	7579494	T	A	NM_000546.6(TP53):c.193A>T (p.Arg65Ter)	Pathogenic	somatic
TP53	17	7577550	7577550	C	A	TCGA-37-3792-01A-01D-0983-08	LUSC		17	7577550	7577550	C	A	NM_000546.6(TP53):c.731G>T (p.Gly244Val)	Likely pathogenic	somatic
TP53	17	7578271	7578271	T	C	TCGA-37-4130-01A-01D-1352-08	LUSC		17	7578271	7578271	T	C	NM_000546.6(TP53):c.578A>G (p.His193Arg)	Pathogenic/Likely pathogenic	germline/somatic
TP53	17	7577547	7577547	C	A	TCGA-37-4132-01A-01D-1352-08	LUSC		17	7577547	7577547	C	A	NM_000546.6(TP53):c.734G>T (p.Gly245Val)	Pathogenic	germline/somatic
TP53	17	7579485	7579485	C	A	TCGA-37-4135-01A-01D-1352-08	LUSC		17	7579485	7579485	C	A	NM_000546.6(TP53):c.202G>T (p.Glu68Ter)	Pathogenic	germline
TP53	17	7578538	7578538	T	A	TCGA-37-A5EL-01A-11D-A26M-08	LUSC		17	7578538	7578538	T	A	NM_000546.6(TP53):c.392A>T (p.Asn131Ile)	Pathogenic	germline
TP53	17	7577548	7577548	C	A	TCGA-37-A5EN-01A-21D-A26M-08	LUSC		17	7577548	7577548	C	A	NM_000546.6(TP53):c.733G>T (p.Gly245Cys)	Pathogenic	germline/somatic
TP53	17	7578407	7578407	G	C	TCGA-39-5016-01A-01D-1441-08	LUSC		17	7578407	7578407	G	C	NM_000546.6(TP53):c.523C>G (p.Arg175Gly)	Pathogenic	germline/somatic
TP53	17	7577127	7577127	C	A	TCGA-39-5019-01A-01D-1817-08	LUSC		17	7577127	7577127	C	A	NM_000546.6(TP53):c.811G>T (p.Glu271Ter)	Pathogenic	somatic
TP53	17	7578212	7578212	G	A	TCGA-39-5029-01A-01D-1441-08	LUSC		17	7578212	7578212	G	A	NM_000546.6(TP53):c.637C>T (p.Arg213Ter)	Pathogenic	germline/somatic
TP53	17	7578257	7578257	C	A	TCGA-39-5034-01A-01D-1441-08	LUSC		17	7578257	7578257	C	A	NM_000546.6(TP53):c.592G>T (p.Glu198Ter)	Pathogenic	somatic
TP53	17	7578457	7578457	C	T	TCGA-39-5035-01A-01D-1441-08	LUSC		17	7578457	7578457	C	T	NM_000546.6(TP53):c.473G>A (p.Arg158His)	Pathogenic/Likely pathogenic	germline
TP53	17	7578395	7578395	G	C	TCGA-39-5037-01A-01D-1441-08	LUSC		17	7578395	7578395	G	C	NM_000546.6(TP53):c.535C>G (p.His179Asp)	Likely pathogenic	somatic
TP53	17	7577548	7577548	C	T	TCGA-3A-A9I9-01A-11D-A38G-08	PAAD		17	7577548	7577548	C	T	NM_000546.6(TP53):c.733G>A (p.Gly245Ser)	Pathogenic	germline/somatic
TP53	17	7578190	7578190	T	C	TCGA-3A-A9IB-01A-21D-A397-08	PAAD		17	7578190	7578190	T	C	NM_000546.6(TP53):c.659A>G (p.Tyr220Cys)	Pathogenic	germline/somatic
TP53	17	7577559	7577559	G	T	TCGA-3A-A9IZ-01A-12D-A40W-08	PAAD		17	7577559	7577559	G	T	NM_000546.6(TP53):c.722C>A (p.Ser241Tyr)	Pathogenic	germline/somatic
TP53	17	7578370	7578370	C	T	TCGA-3A-A9J0-01A-11D-A40W-08	PAAD		17	7578370	7578370	C	T	NM_000546.6(TP53):c.559+1G>A	Pathogenic/Likely pathogenic	germline
TP53	17	7578555	7578555	C	T	TCGA-3B-A9HP-01A-11D-A387-09	SARC		17	7578555	7578555	C	T	NM_000546.6(TP53):c.376-1G>A	Pathogenic/Likely pathogenic	germline/somatic
TP53	17	7579414	7579414	C	T	TCGA-3B-A9HT-01A-11D-A38Z-09	SARC		17	7579414	7579414	C	T	NM_000546.6(TP53):c.273G>A (p.Trp91Ter)	Pathogenic	germline/somatic
TP53	17	7577498	7577498	C	T	TCGA-3B-A9HU-01A-11D-A38Z-09	SARC		17	7577498	7577498	C	T	NM_000546.6(TP53):c.782+1G>A	Pathogenic	germline/somatic
TP53	17	7577539	7577539	G	A	TCGA-3B-A9HY-01A-11D-A38Z-09	SARC		17	7577539	7577539	G	A	NM_000546.6(TP53):c.742C>T (p.Arg248Trp)	Pathogenic	germline/somatic
TP53	17	7577114	7577114	C	T	TCGA-3B-A9HZ-01A-11D-A38Z-09	SARC		17	7577114	7577114	C	T	NM_000546.6(TP53):c.824G>A (p.Cys275Tyr)	Pathogenic/Likely pathogenic	germline/somatic
TP53	17	7577551	7577551	C	T	TCGA-3B-A9I1-01A-11D-A38Z-09	SARC		17	7577551	7577551	C	T	NM_000546.6(TP53):c.730G>A (p.Gly244Ser)	Pathogenic	germline/somatic
TP53	17	7578406	7578406	C	T	TCGA-3B-A9I3-01A-11D-A38Z-09	SARC		17	7578406	7578406	C	T	NM_000546.6(TP53):c.524G>A (p.Arg175His)	Pathogenic	germline/somatic
TP53	17	7577058	7577058	C	A	TCGA-3E-AAAY-01A-11D-A38G-08	PAAD		17	7577058	7577058	C	A	NM_000546.6(TP53):c.880G>T (p.Glu294Ter)	Pathogenic	germline/somatic
TP53	17	7577538	7577538	C	A	TCGA-3G-AB14-01A-11D-A423-09	THYM		17	7577538	7577538	C	A	NM_000546.6(TP53):c.743G>T (p.Arg248Leu)	Pathogenic	germline/somatic
TP53	17	7577111	7577111	G	T	TCGA-3H-AB3T-01A-11D-A39R-32	MESO		17	7577111	7577111	G	T	NM_000546.6(TP53):c.827C>A (p.Ala276Asp)	Likely pathogenic	germline
TP53	17	7578509	7578509	A	C	TCGA-3N-A9WD-06A-11D-A38G-08	SKCM		17	7578509	7578509	A	C	NM_000546.6(TP53):c.421T>G (p.Cys141Gly)	Likely pathogenic	somatic
TP53	17	7577120	7577120	C	A	TCGA-3P-A9WA-01A-11D-A403-09	OV		17	7577120	7577120	C	A	NM_000546.6(TP53):c.818G>T (p.Arg273Leu)	Pathogenic	germline/somatic
TP53	17	7578263	7578263	G	A	TCGA-3U-A98E-01A-11D-A39R-32	MESO		17	7578263	7578263	G	A	NM_000546.6(TP53):c.586C>T (p.Arg196Ter)	Pathogenic	germline/somatic
TP53	17	7577121	7577121	G	A	TCGA-3U-A98I-01A-11D-A39R-32	MESO		17	7577121	7577121	G	A	NM_000546.6(TP53):c.817C>T (p.Arg273Cys)	Pathogenic/Likely pathogenic	germline/somatic
TP53	17	7577539	7577539	G	A	TCGA-3X-AAVB-01A-31D-A417-09	CHOL		17	7577539	7577539	G	A	NM_000546.6(TP53):c.742C>T (p.Arg248Trp)	Pathogenic	germline/somatic
TP53	17	7577559	7577559	G	A	TCGA-3X-AAVC-01A-21D-A417-09	CHOL		17	7577559	7577559	G	A	NM_000546.6(TP53):c.722C>T (p.Ser241Phe)	Likely pathogenic	germline/somatic
TP53	17	7578555	7578555	C	T	TCGA-41-5651-01A-01D-1696-08	GBM		17	7578555	7578555	C	T	NM_000546.6(TP53):c.376-1G>A	Pathogenic/Likely pathogenic	germline/somatic
TP53	17	7577120	7577120	C	T	TCGA-42-2582-01A-01D-1526-09	OV		17	7577120	7577120	C	T	NM_000546.6(TP53):c.818G>A (p.Arg273His)	Pathogenic	germline/somatic
TP53	17	7577568	7577568	C	T	TCGA-42-2587-01A-01D-1526-09	OV		17	7577568	7577568	C	T	NM_000546.6(TP53):c.713G>A (p.Cys238Tyr)	Pathogenic/Likely pathogenic	germline/somatic
TP53	17	7578403	7578403	C	T	TCGA-42-2589-01A-01D-1526-09	OV		17	7578403	7578403	C	T	NM_000546.6(TP53):c.527G>A (p.Cys176Tyr)	Pathogenic	germline/somatic
TP53	17	7578271	7578271	T	G	TCGA-43-2581-01A-01D-1522-08	LUSC		17	7578271	7578271	T	G	NM_000546.6(TP53):c.578A>C (p.His193Pro)	Pathogenic	germline/somatic
TP53	17	7577120	7577120	C	A	TCGA-43-5668-01A-01D-1632-08	LUSC		17	7577120	7577120	C	A	NM_000546.6(TP53):c.818G>T (p.Arg273Leu)	Pathogenic	germline/somatic
TP53	17	7578280	7578280	G	A	TCGA-43-5670-01A-21D-2122-08	LUSC		17	7578280	7578280	G	A	NM_000546.6(TP53):c.569C>T (p.Pro190Leu)	Likely pathogenic	germline
TP53	17	7578208	7578208	T	C	TCGA-43-6143-01A-11D-1817-08	LUSC		17	7578208	7578208	T	C	NM_000546.6(TP53):c.641A>G (p.His214Arg)	Likely pathogenic	germline/somatic
TP53	17	7577538	7577538	C	A	TCGA-43-6647-01A-11D-1817-08	LUSC		17	7577538	7577538	C	A	NM_000546.6(TP53):c.743G>T (p.Arg248Leu)	Pathogenic	germline/somatic
TP53	17	7578235	7578235	T	C	TCGA-43-6770-01A-11D-1817-08	LUSC		17	7578235	7578235	T	C	NM_000546.6(TP53):c.614A>G (p.Tyr205Cys)	Likely pathogenic	germline/somatic
TP53	17	7578208	7578208	T	C	TCGA-43-6773-01A-41D-1945-08	LUSC		17	7578208	7578208	T	C	NM_000546.6(TP53):c.641A>G (p.His214Arg)	Likely pathogenic	germline/somatic
TP53	17	7578457	7578457	C	A	TCGA-43-7658-01A-11D-2122-08	LUSC		17	7578457	7578457	C	A	NM_000546.6(TP53):c.473G>T (p.Arg158Leu)	Pathogenic	germline
TP53	17	7578442	7578442	T	C	TCGA-43-8115-01A-11D-2244-08	LUSC		17	7578442	7578442	T	C	NM_000546.6(TP53):c.488A>G (p.Tyr163Cys)	Pathogenic	germline/somatic
TP53	17	7577610	7577610	T	C	TCGA-43-A474-01A-11D-A24D-08	LUSC		17	7577610	7577610	T	C	NM_000546.6(TP53):c.673-2A>G	Pathogenic	germline/somatic
TP53	17	7579699	7579699	C	T	TCGA-43-A56V-01A-11D-A26M-08	LUSC		17	7579699	7579699	C	T	NM_000546.6(TP53):c.96+1G>A	Likely pathogenic	germline/somatic
TP53	17	7578556	7578556	T	A	TCGA-44-2659-01A-01D-0969-08	LUAD		17	7578556	7578556	T	A	NM_000546.6(TP53):c.376-2A>T	Likely pathogenic	germline/somatic
TP53	17	7577082	7577082	C	A	TCGA-44-2668-01A-01D-A271-08	LUAD		17	7577082	7577082	C	A	NM_000546.6(TP53):c.856G>T (p.Glu286Ter)	Pathogenic	germline/somatic
TP53	17	7576928	7576928	T	C	TCGA-44-3918-01A-01D-A271-08	LUAD		17	7576928	7576928	T	C	NM_000546.6(TP53):c.920-2A>G	Pathogenic/Likely pathogenic	germline/somatic
TP53	17	7579361	7579361	A	C	TCGA-44-5644-01A-21D-2036-08	LUAD		17	7579361	7579361	A	C	NM_000546.6(TP53):c.326T>G (p.Phe109Cys)	Likely pathogenic	somatic
TP53	17	7573967	7573967	G	A	TCGA-44-5645-01A-51D-A27T-08	LUAD		17	7573967	7573967	G	A	NM_000546.6(TP53):c.1060C>T (p.Gln354Ter)	Likely pathogenic	germline
TP53	17	7574017	7574017	C	A	TCGA-44-6144-01A-11D-1753-08	LUAD		17	7574017	7574017	C	A	NM_000546.6(TP53):c.1010G>T (p.Arg337Leu)	Likely pathogenic	germline/somatic
TP53	17	7579358	7579358	C	A	TCGA-44-6147-01A-31D-A27T-08	LUAD		17	7579358	7579358	C	A	NM_000546.6(TP53):c.329G>T (p.Arg110Leu)	Pathogenic/Likely pathogenic	germline/somatic
TP53	17	7577548	7577548	C	A	TCGA-44-6774-01A-21D-1855-08	LUAD		17	7577548	7577548	C	A	NM_000546.6(TP53):c.733G>T (p.Gly245Cys)	Pathogenic	germline/somatic
TP53	17	7577547	7577547	C	A	TCGA-44-6777-01A-11D-1855-08	LUAD		17	7577547	7577547	C	A	NM_000546.6(TP53):c.734G>T (p.Gly245Val)	Pathogenic	germline/somatic
TP53	17	7578212	7578212	G	A	TCGA-44-7661-01A-11D-2063-08	LUAD		17	7578212	7578212	G	A	NM_000546.6(TP53):c.637C>T (p.Arg213Ter)	Pathogenic	germline/somatic
TP53	17	7579485	7579485	C	A	TCGA-44-7662-01A-11D-2063-08	LUAD		17	7579485	7579485	C	A	NM_000546.6(TP53):c.202G>T (p.Glu68Ter)	Pathogenic	germline
TP53	17	7574017	7574017	C	A	TCGA-44-7670-01A-11D-2063-08	LUAD		17	7574017	7574017	C	A	NM_000546.6(TP53):c.1010G>T (p.Arg337Leu)	Likely pathogenic	germline/somatic
TP53	17	7578419	7578419	C	A	TCGA-44-8117-01A-11D-2238-08	LUAD		17	7578419	7578419	C	A	NM_000546.6(TP53):c.511G>T (p.Glu171Ter)	Pathogenic	germline/somatic
TP53	17	7573982	7573982	C	A	TCGA-44-8120-01A-11D-2238-08	LUAD		17	7573982	7573982	C	A	NM_000546.6(TP53):c.1045G>T (p.Glu349Ter)	Pathogenic	germline/somatic
TP53	17	7577547	7577547	C	A	TCGA-44-A4SS-01A-11D-A24P-08	LUAD		17	7577547	7577547	C	A	NM_000546.6(TP53):c.734G>T (p.Gly245Val)	Pathogenic	germline/somatic
TP53	17	7577548	7577548	C	A	TCGA-44-A4SS-01A-11D-A24P-08	LUAD		17	7577548	7577548	C	A	NM_000546.6(TP53):c.733G>T (p.Gly245Cys)	Pathogenic	germline/somatic
TP53	17	7579528	7579528	C	T	TCGA-44-A4SU-01A-11D-A24P-08	LUAD		17	7579528	7579528	C	T	NM_000546.6(TP53):c.159G>A (p.Trp53Ter)	Pathogenic	germline
TP53	17	7577120	7577120	C	T	TCGA-46-3765-01A-01D-0983-08	LUSC		17	7577120	7577120	C	T	NM_000546.6(TP53):c.818G>A (p.Arg273His)	Pathogenic	germline/somatic
TP53	17	7578271	7578271	T	C	TCGA-46-3767-01A-01D-0983-08	LUSC		17	7578271	7578271	T	C	NM_000546.6(TP53):c.578A>G (p.His193Arg)	Pathogenic/Likely pathogenic	germline/somatic
TP53	17	7577538	7577538	C	G	TCGA-46-3768-01A-01D-0983-08	LUSC		17	7577538	7577538	C	G	NM_000546.6(TP53):c.743G>C (p.Arg248Pro)	Pathogenic	germline/somatic
TP53	17	7578416	7578416	C	A	TCGA-46-6025-01A-11D-1817-08	LUSC		17	7578416	7578416	C	A	NM_000546.6(TP53):c.514G>T (p.Val172Phe)	Likely pathogenic	germline
TP53	17	7578212	7578212	G	A	TCGA-49-4490-01A-21D-1855-08	LUAD		17	7578212	7578212	G	A	NM_000546.6(TP53):c.637C>T (p.Arg213Ter)	Pathogenic	germline/somatic
TP53	17	7578406	7578406	C	T	TCGA-49-4514-01A-21D-1855-08	LUAD		17	7578406	7578406	C	T	NM_000546.6(TP53):c.524G>A (p.Arg175His)	Pathogenic	germline/somatic
TP53	17	7576855	7576855	G	A	TCGA-49-6767-01A-11D-1855-08	LUAD		17	7576855	7576855	G	A	NM_000546.6(TP53):c.991C>T (p.Gln331Ter)	Pathogenic	germline
TP53	17	7577120	7577120	C	T	TCGA-49-AAQV-01A-11D-A397-08	LUAD		17	7577120	7577120	C	T	NM_000546.6(TP53):c.818G>A (p.Arg273His)	Pathogenic	germline/somatic
TP53	17	7574012	7574012	C	A	TCGA-49-AAR0-01A-21D-A397-08	LUAD		17	7574012	7574012	C	A	NM_000546.6(TP53):c.1015G>T (p.Glu339Ter)	Pathogenic	germline
TP53	17	7578235	7578235	T	C	TCGA-49-AAR9-01A-21D-A410-08	LUAD		17	7578235	7578235	T	C	NM_000546.6(TP53):c.614A>G (p.Tyr205Cys)	Likely pathogenic	germline/somatic
TP53	17	7577121	7577121	G	C	TCGA-49-AARE-01A-11D-A410-08	LUAD		17	7577121	7577121	G	C	NM_000546.6(TP53):c.817C>G (p.Arg273Gly)	Pathogenic	germline/somatic
TP53	17	7577570	7577570	C	T	TCGA-49-AARN-01A-21D-A410-08	LUAD		17	7577570	7577570	C	T	NM_000546.6(TP53):c.711G>A (p.Met237Ile)	Pathogenic	germline/somatic
TP53	17	7578457	7578457	C	A	TCGA-49-AARQ-01A-11D-A410-08	LUAD		17	7578457	7578457	C	A	NM_000546.6(TP53):c.473G>T (p.Arg158Leu)	Pathogenic	germline
TP53	17	7578208	7578208	T	C	TCGA-4B-A93V-01A-11D-A397-08	LUAD		17	7578208	7578208	T	C	NM_000546.6(TP53):c.641A>G (p.His214Arg)	Likely pathogenic	germline/somatic
TP53	17	7577120	7577120	C	T	TCGA-4N-A93T-01A-11D-A36X-10	COAD		17	7577120	7577120	C	T	NM_000546.6(TP53):c.818G>A (p.Arg273His)	Pathogenic	germline/somatic
TP53	17	7577539	7577539	G	A	TCGA-4W-AA9R-01A-11D-A391-08	GBM		17	7577539	7577539	G	A	NM_000546.6(TP53):c.742C>T (p.Arg248Trp)	Pathogenic	germline/somatic
TP53	17	7578534	7578534	C	G	TCGA-4Z-AA7Q-01A-11D-A391-08	BLCA		17	7578534	7578534	C	G	NM_000546.6(TP53):c.396G>C (p.Lys132Asn)	Likely pathogenic	germline/somatic
TP53	17	7577548	7577548	C	T	TCGA-4Z-AA7W-01A-11D-A391-08	BLCA		17	7577548	7577548	C	T	NM_000546.6(TP53):c.733G>A (p.Gly245Ser)	Pathogenic	germline/somatic
TP53	17	7577120	7577120	C	A	TCGA-4Z-AA84-01A-11D-A391-08	BLCA		17	7577120	7577120	C	A	NM_000546.6(TP53):c.818G>T (p.Arg273Leu)	Pathogenic	germline/somatic
TP53	17	7579591	7579591	C	T	TCGA-4Z-AA87-01A-11D-A391-08	BLCA		17	7579591	7579591	C	T	NM_000546.6(TP53):c.97-1G>A	Likely pathogenic	germline/somatic
TP53	17	7577046	7577046	C	A	TCGA-50-5049-01A-01D-1625-08	LUAD		17	7577046	7577046	C	A	NM_000546.6(TP53):c.892G>T (p.Glu298Ter)	Pathogenic	germline/somatic
TP53	17	7578393	7578393	A	T	TCGA-50-5066-01A-01D-1625-08	LUAD		17	7578393	7578393	A	T	NM_000546.6(TP53):c.537T>A (p.His179Gln)	Pathogenic	germline/somatic
TP53	17	7579414	7579414	C	T	TCGA-50-5931-01A-11D-1753-08	LUAD		17	7579414	7579414	C	T	NM_000546.6(TP53):c.273G>A (p.Trp91Ter)	Pathogenic	germline/somatic
TP53	17	7578457	7578457	C	A	TCGA-50-5933-01A-11D-1753-08	LUAD		17	7578457	7578457	C	A	NM_000546.6(TP53):c.473G>T (p.Arg158Leu)	Pathogenic	germline
TP53	17	7577085	7577085	C	T	TCGA-50-5939-01A-11D-1625-08	LUAD		17	7577085	7577085	C	T	NM_000546.6(TP53):c.853G>A (p.Glu285Lys)	Pathogenic/Likely pathogenic	germline/somatic
TP53	17	7578370	7578370	C	A	TCGA-50-6590-01A-12D-1855-08	LUAD		17	7578370	7578370	C	A	NM_000546.6(TP53):c.559+1G>T	Likely pathogenic	germline/somatic
TP53	17	7577124	7577124	C	T	TCGA-50-6594-01A-11D-1753-08	LUAD		17	7577124	7577124	C	T	NM_000546.6(TP53):c.814G>A (p.Val272Met)	Pathogenic	germline/somatic
TP53	17	7578382	7578382	G	C	TCGA-50-6595-01A-12D-1855-08	LUAD		17	7578382	7578382	G	C	NM_000546.6(TP53):c.548C>G (p.Ser183Ter)	Pathogenic	germline/somatic
TP53	17	7578406	7578406	C	T	TCGA-50-6595-01A-12D-1855-08	LUAD		17	7578406	7578406	C	T	NM_000546.6(TP53):c.524G>A (p.Arg175His)	Pathogenic	germline/somatic
TP53	17	7574018	7574018	G	A	TCGA-50-6673-01A-11D-1945-08	LUAD		17	7574018	7574018	G	A	NM_000546.6(TP53):c.1009C>T (p.Arg337Cys)	Pathogenic/Likely pathogenic	germline/somatic
TP53	17	7577094	7577094	G	A	TCGA-50-8460-01A-11D-2323-08	LUAD		17	7577094	7577094	G	A	NM_000546.6(TP53):c.844C>T (p.Arg282Trp)	Pathogenic/Likely pathogenic	germline/somatic
TP53	17	7574017	7574017	C	A	TCGA-51-4080-01A-01D-1458-08	LUSC		17	7574017	7574017	C	A	NM_000546.6(TP53):c.1010G>T (p.Arg337Leu)	Likely pathogenic	germline/somatic
TP53	17	7577120	7577120	C	A	TCGA-51-4081-01A-01D-1458-08	LUSC		17	7577120	7577120	C	A	NM_000546.6(TP53):c.818G>T (p.Arg273Leu)	Pathogenic	germline/somatic
TP53	17	7578190	7578190	T	C	TCGA-51-6867-01A-11D-2042-08	LUSC		17	7578190	7578190	T	C	NM_000546.6(TP53):c.659A>G (p.Tyr220Cys)	Pathogenic	germline/somatic
TP53	17	7577609	7577609	C	T	TCGA-52-7810-01A-11D-2122-08	LUSC		17	7577609	7577609	C	T	NM_000546.6(TP53):c.673-1G>A	Pathogenic	germline
TP53	17	7576852	7576852	C	A	TCGA-53-7624-01A-11D-2063-08	LUAD		17	7576852	7576852	C	A	NM_000546.6(TP53):c.993+1G>T	Pathogenic	germline/somatic
TP53	17	7577570	7577570	C	T	TCGA-53-7626-01A-12D-2063-08	LUAD		17	7577570	7577570	C	T	NM_000546.6(TP53):c.711G>A (p.Met237Ile)	Pathogenic	germline/somatic
TP53	17	7578433	7578433	G	C	TCGA-55-1594-01A-01D-1040-01	LUAD		17	7578433	7578433	G	C	NM_000546.6(TP53):c.497C>G (p.Ser166Ter)	Pathogenic	somatic
TP53	17	7577097	7577097	C	A	TCGA-55-1596-01A-01D-1040-01	LUAD		17	7577097	7577097	C	A	NM_000546.6(TP53):c.841G>T (p.Asp281Tyr)	Pathogenic	germline/somatic
TP53	17	7577120	7577120	C	A	TCGA-55-6969-01A-11D-1945-08	LUAD		17	7577120	7577120	C	A	NM_000546.6(TP53):c.818G>T (p.Arg273Leu)	Pathogenic	germline/somatic
TP53	17	7578500	7578500	G	A	TCGA-55-7283-01A-11D-2036-08	LUAD		17	7578500	7578500	G	A	NM_000546.6(TP53):c.430C>T (p.Gln144Ter)	Pathogenic	germline/somatic
TP53	17	7578442	7578442	T	C	TCGA-55-7570-01A-11D-2036-08	LUAD		17	7578442	7578442	T	C	NM_000546.6(TP53):c.488A>G (p.Tyr163Cys)	Pathogenic	germline/somatic
TP53	17	7573991	7573991	C	A	TCGA-55-7574-01A-11D-2036-08	LUAD		17	7573991	7573991	C	A	NM_000546.6(TP53):c.1036G>T (p.Glu346Ter)	Pathogenic	germline/somatic
TP53	17	7576897	7576897	G	A	TCGA-55-7576-01A-11D-2063-08	LUAD		17	7576897	7576897	G	A	NM_000546.6(TP53):c.949C>T (p.Gln317Ter)	Pathogenic/Likely pathogenic	germline
TP53	17	7578457	7578457	C	G	TCGA-55-7907-01A-11D-2167-08	LUAD		17	7578457	7578457	C	G	NM_000546.6(TP53):c.473G>C (p.Arg158Pro)	Likely pathogenic	germline
TP53	17	7577120	7577120	C	A	TCGA-55-7994-01A-11D-2184-08	LUAD		17	7577120	7577120	C	A	NM_000546.6(TP53):c.818G>T (p.Arg273Leu)	Pathogenic	germline/somatic
TP53	17	7578395	7578395	G	A	TCGA-55-7995-01A-11D-2184-08	LUAD		17	7578395	7578395	G	A	NM_000546.6(TP53):c.535C>T (p.His179Tyr)	Pathogenic/Likely pathogenic	germline/somatic
TP53	17	7576855	7576855	G	A	TCGA-55-8085-01A-11D-2238-08	LUAD		17	7576855	7576855	G	A	NM_000546.6(TP53):c.991C>T (p.Gln331Ter)	Pathogenic	germline
TP53	17	7578457	7578457	C	A	TCGA-55-8092-01A-11D-2238-08	LUAD		17	7578457	7578457	C	A	NM_000546.6(TP53):c.473G>T (p.Arg158Leu)	Pathogenic	germline
TP53	17	7576897	7576897	G	A	TCGA-55-8094-01A-11D-2238-08	LUAD		17	7576897	7576897	G	A	NM_000546.6(TP53):c.949C>T (p.Gln317Ter)	Pathogenic/Likely pathogenic	germline
TP53	17	7574012	7574012	C	A	TCGA-55-8096-01A-11D-2238-08	LUAD		17	7574012	7574012	C	A	NM_000546.6(TP53):c.1015G>T (p.Glu339Ter)	Pathogenic	germline
TP53	17	7577018	7577018	C	A	TCGA-55-8204-01A-11D-2238-08	LUAD		17	7577018	7577018	C	A	NM_000546.6(TP53):c.919+1G>T	Likely pathogenic	germline/somatic
TP53	17	7578235	7578235	T	C	TCGA-55-8205-01A-11D-2238-08	LUAD		17	7578235	7578235	T	C	NM_000546.6(TP53):c.614A>G (p.Tyr205Cys)	Likely pathogenic	germline/somatic
TP53	17	7577114	7577114	C	A	TCGA-55-8208-01A-11D-2238-08	LUAD		17	7577114	7577114	C	A	NM_000546.6(TP53):c.824G>T (p.Cys275Phe)	Likely pathogenic	somatic
TP53	17	7577547	7577547	C	A	TCGA-55-8301-01A-11D-2284-08	LUAD		17	7577547	7577547	C	A	NM_000546.6(TP53):c.734G>T (p.Gly245Val)	Pathogenic	germline/somatic
TP53	17	7577548	7577548	C	T	TCGA-55-8301-01A-11D-2284-08	LUAD		17	7577548	7577548	C	T	NM_000546.6(TP53):c.733G>A (p.Gly245Ser)	Pathogenic	germline/somatic
TP53	17	7576897	7576897	G	A	TCGA-55-8507-01A-11D-2393-08	LUAD		17	7576897	7576897	G	A	NM_000546.6(TP53):c.949C>T (p.Gln317Ter)	Pathogenic/Likely pathogenic	germline
TP53	17	7578212	7578212	G	A	TCGA-55-8510-01A-11D-2393-08	LUAD		17	7578212	7578212	G	A	NM_000546.6(TP53):c.637C>T (p.Arg213Ter)	Pathogenic	germline/somatic
TP53	17	7574017	7574017	C	G	TCGA-55-8514-01A-11D-2393-08	LUAD		17	7574017	7574017	C	G	NM_000546.6(TP53):c.1010G>C (p.Arg337Pro)	Likely pathogenic	germline
TP53	17	7578500	7578500	G	A	TCGA-55-8616-01A-11D-2393-08	LUAD		17	7578500	7578500	G	A	NM_000546.6(TP53):c.430C>T (p.Gln144Ter)	Pathogenic	germline/somatic
TP53	17	7579358	7579358	C	A	TCGA-55-A48X-01A-11D-A24D-08	LUAD		17	7579358	7579358	C	A	NM_000546.6(TP53):c.329G>T (p.Arg110Leu)	Pathogenic/Likely pathogenic	germline/somatic
TP53	17	7574018	7574018	G	A	TCGA-55-A48Z-01A-12D-A24P-08	LUAD		17	7574018	7574018	G	A	NM_000546.6(TP53):c.1009C>T (p.Arg337Cys)	Pathogenic/Likely pathogenic	germline/somatic
TP53	17	7578271	7578271	T	C	TCGA-55-A491-01A-11D-A24D-08	LUAD		17	7578271	7578271	T	C	NM_000546.6(TP53):c.578A>G (p.His193Arg)	Pathogenic/Likely pathogenic	germline/somatic
TP53	17	7577121	7577121	G	T	TCGA-55-A493-01A-11D-A24D-08	LUAD		17	7577121	7577121	G	T	NM_000546.6(TP53):c.817C>A (p.Arg273Ser)	Pathogenic/Likely pathogenic	germline/somatic
TP53	17	7578457	7578457	C	A	TCGA-55-A4DG-01A-11D-A24D-08	LUAD		17	7578457	7578457	C	A	NM_000546.6(TP53):c.473G>T (p.Arg158Leu)	Pathogenic	germline
TP53	17	7574017	7574017	C	A	TCGA-56-1622-01A-01D-1521-08	LUSC		17	7574017	7574017	C	A	NM_000546.6(TP53):c.1010G>T (p.Arg337Leu)	Likely pathogenic	germline/somatic
TP53	17	7578212	7578212	G	A	TCGA-56-5897-01A-11D-1632-08	LUSC		17	7578212	7578212	G	A	NM_000546.6(TP53):c.637C>T (p.Arg213Ter)	Pathogenic	germline/somatic
TP53	17	7578442	7578442	T	C	TCGA-56-5898-01A-11D-1632-08	LUSC		17	7578442	7578442	T	C	NM_000546.6(TP53):c.488A>G (p.Tyr163Cys)	Pathogenic	germline/somatic
TP53	17	7578395	7578395	G	A	TCGA-56-6546-01A-11D-1817-08	LUSC		17	7578395	7578395	G	A	NM_000546.6(TP53):c.535C>T (p.His179Tyr)	Pathogenic/Likely pathogenic	germline/somatic
TP53	17	7577506	7577506	C	A	TCGA-56-7221-01A-11D-2042-08	LUSC		17	7577506	7577506	C	A	NM_000546.6(TP53):c.775G>T (p.Asp259Tyr)	Likely pathogenic	somatic
TP53	17	7578382	7578382	G	C	TCGA-56-7221-01A-11D-2042-08	LUSC		17	7578382	7578382	G	C	NM_000546.6(TP53):c.548C>G (p.Ser183Ter)	Pathogenic	germline/somatic
TP53	17	7578419	7578419	C	A	TCGA-56-7222-01A-11D-2042-08	LUSC		17	7578419	7578419	C	A	NM_000546.6(TP53):c.511G>T (p.Glu171Ter)	Pathogenic	germline/somatic
TP53	17	7578403	7578403	C	A	TCGA-56-7223-01A-11D-2042-08	LUSC		17	7578403	7578403	C	A	NM_000546.6(TP53):c.527G>T (p.Cys176Phe)	Likely pathogenic	germline/somatic
TP53	17	7577559	7577559	G	C	TCGA-56-7579-01A-11D-2042-08	LUSC		17	7577559	7577559	G	C	NM_000546.6(TP53):c.722C>G (p.Ser241Cys)	Likely pathogenic	germline/somatic
TP53	17	7579503	7579503	C	A	TCGA-56-7580-01A-11D-2042-08	LUSC		17	7579503	7579503	C	A	NM_000546.6(TP53):c.184G>T (p.Glu62Ter)	Pathogenic	germline
TP53	17	7576852	7576852	C	T	TCGA-56-7582-01A-11D-2042-08	LUSC		17	7576852	7576852	C	T	NM_000546.6(TP53):c.993+1G>A	Pathogenic	germline/somatic
TP53	17	7579374	7579374	C	T	TCGA-56-7730-01A-11D-2122-08	LUSC		17	7579374	7579374	C	T	NM_000546.6(TP53):c.313G>A (p.Gly105Ser)	Likely pathogenic	germline
TP53	17	7578406	7578406	C	T	TCGA-56-8201-01A-11D-2244-08	LUSC		17	7578406	7578406	C	T	NM_000546.6(TP53):c.524G>A (p.Arg175His)	Pathogenic	germline/somatic
TP53	17	7577581	7577581	A	G	TCGA-56-8304-01A-11D-2323-08	LUSC		17	7577581	7577581	A	G	NM_000546.6(TP53):c.700T>C (p.Tyr234His)	Pathogenic	germline/somatic
TP53	17	7577046	7577046	C	A	TCGA-56-8307-01A-11D-2293-08	LUSC		17	7577046	7577046	C	A	NM_000546.6(TP53):c.892G>T (p.Glu298Ter)	Pathogenic	germline/somatic
TP53	17	7578406	7578406	C	T	TCGA-56-8309-01A-11D-2293-08	LUSC		17	7578406	7578406	C	T	NM_000546.6(TP53):c.524G>A (p.Arg175His)	Pathogenic	germline/somatic
TP53	17	7577120	7577120	C	A	TCGA-56-8503-01A-11D-2395-08	LUSC		17	7577120	7577120	C	A	NM_000546.6(TP53):c.818G>T (p.Arg273Leu)	Pathogenic	germline/somatic
TP53	17	7578556	7578556	T	A	TCGA-56-8622-01A-11D-2395-08	LUSC		17	7578556	7578556	T	A	NM_000546.6(TP53):c.376-2A>T	Likely pathogenic	germline/somatic
TP53	17	7577127	7577127	C	A	TCGA-56-8628-01A-11D-2395-08	LUSC		17	7577127	7577127	C	A	NM_000546.6(TP53):c.811G>T (p.Glu271Ter)	Pathogenic	somatic
TP53	17	7577609	7577609	C	A	TCGA-56-A4BW-01A-11D-A24D-08	LUSC		17	7577609	7577609	C	A	NM_000546.6(TP53):c.673-1G>T	Pathogenic	germline/somatic
TP53	17	7577550	7577550	C	T	TCGA-56-A4BY-01A-11D-A24D-08	LUSC		17	7577550	7577550	C	T	NM_000546.6(TP53):c.731G>A (p.Gly244Asp)	Pathogenic/Likely pathogenic	germline/somatic
TP53	17	7578275	7578275	G	A	TCGA-56-A4ZK-01A-11D-A25L-08	LUSC		17	7578275	7578275	G	A	NM_000546.6(TP53):c.574C>T (p.Gln192Ter)	Pathogenic	germline
TP53	17	7577120	7577120	C	A	TCGA-58-8386-01A-11D-2293-08	LUSC		17	7577120	7577120	C	A	NM_000546.6(TP53):c.818G>T (p.Arg273Leu)	Pathogenic	germline/somatic
TP53	17	7577547	7577547	C	A	TCGA-58-8391-01A-11D-2323-08	LUSC		17	7577547	7577547	C	A	NM_000546.6(TP53):c.734G>T (p.Gly245Val)	Pathogenic	germline/somatic
TP53	17	7577102	7577102	C	T	TCGA-58-8393-01A-11D-2323-08	LUSC		17	7577102	7577102	C	T	NM_000546.6(TP53):c.836G>A (p.Gly279Glu)	Pathogenic/Likely pathogenic	germline/somatic
TP53	17	7578457	7578457	C	A	TCGA-58-A46K-01A-11D-A24D-08	LUSC		17	7578457	7578457	C	A	NM_000546.6(TP53):c.473G>T (p.Arg158Leu)	Pathogenic	germline
TP53	17	7578493	7578493	C	T	TCGA-58-A46M-01A-11D-A24D-08	LUSC		17	7578493	7578493	C	T	NM_000546.6(TP53):c.437G>A (p.Trp146Ter)	Pathogenic	germline/somatic
TP53	17	7577058	7577058	C	A	TCGA-58-A46N-01A-11D-A24D-08	LUSC		17	7577058	7577058	C	A	NM_000546.6(TP53):c.880G>T (p.Glu294Ter)	Pathogenic	germline/somatic
TP53	17	7578406	7578406	C	T	TCGA-59-2372-01A-01D-1526-09	OV		17	7578406	7578406	C	T	NM_000546.6(TP53):c.524G>A (p.Arg175His)	Pathogenic	germline/somatic
TP53	17	7578492	7578492	C	T	TCGA-59-A5PD-01A-11D-A403-09	OV		17	7578492	7578492	C	T	NM_000546.6(TP53):c.438G>A (p.Trp146Ter)	Pathogenic	germline/somatic
TP53	17	7578272	7578272	G	A	TCGA-5B-A90C-01A-11D-A37N-09	UCEC		17	7578272	7578272	G	A	NM_000546.6(TP53):c.577C>T (p.His193Tyr)	Pathogenic/Likely pathogenic	germline/somatic
TP53	17	7577121	7577121	G	A	TCGA-5M-AAT4-01A-11D-A40P-10	COAD		17	7577121	7577121	G	A	NM_000546.6(TP53):c.817C>T (p.Arg273Cys)	Pathogenic/Likely pathogenic	germline/somatic
TP53	17	7577538	7577538	C	T	TCGA-5N-A9KI-01A-31D-A42E-08	BLCA		17	7577538	7577538	C	T	NM_000546.6(TP53):c.743G>A (p.Arg248Gln)	Pathogenic	germline/somatic
TP53	17	7577610	7577610	T	C	TCGA-60-2695-01A-01D-1522-08	LUSC		17	7577610	7577610	T	C	NM_000546.6(TP53):c.673-2A>G	Pathogenic	germline/somatic
TP53	17	7578212	7578212	G	A	TCGA-60-2698-01A-01D-1522-08	LUSC		17	7578212	7578212	G	A	NM_000546.6(TP53):c.637C>T (p.Arg213Ter)	Pathogenic	germline/somatic
TP53	17	7577580	7577580	T	C	TCGA-60-2703-01A-11D-2042-08	LUSC		17	7577580	7577580	T	C	NM_000546.6(TP53):c.701A>G (p.Tyr234Cys)	Pathogenic/Likely pathogenic	germline/somatic
TP53	17	7577548	7577548	C	A	TCGA-60-2709-01A-21D-1817-08	LUSC		17	7577548	7577548	C	A	NM_000546.6(TP53):c.733G>T (p.Gly245Cys)	Pathogenic	germline/somatic
TP53	17	7577550	7577550	C	T	TCGA-60-2710-01A-01D-1522-08	LUSC		17	7577550	7577550	C	T	NM_000546.6(TP53):c.731G>A (p.Gly244Asp)	Pathogenic/Likely pathogenic	germline/somatic
TP53	17	7578538	7578538	T	A	TCGA-60-2714-01A-01D-1522-08	LUSC		17	7578538	7578538	T	A	NM_000546.6(TP53):c.392A>T (p.Asn131Ile)	Pathogenic	germline
TP53	17	7578272	7578272	G	C	TCGA-60-2719-01A-01D-1522-08	LUSC		17	7578272	7578272	G	C	NM_000546.6(TP53):c.577C>G (p.His193Asp)	Likely pathogenic	somatic
TP53	17	7578190	7578190	T	C	TCGA-60-2720-01A-01D-1522-08	LUSC		17	7578190	7578190	T	C	NM_000546.6(TP53):c.659A>G (p.Tyr220Cys)	Pathogenic	germline/somatic
TP53	17	7578239	7578239	C	A	TCGA-60-2721-01A-01D-1522-08	LUSC		17	7578239	7578239	C	A	NM_000546.6(TP53):c.610G>T (p.Glu204Ter)	Pathogenic	somatic
TP53	17	7578176	7578176	C	A	TCGA-60-2723-01A-01D-1522-08	LUSC		17	7578176	7578176	C	A	NM_000546.6(TP53):c.672+1G>T	Pathogenic/Likely pathogenic	germline/somatic
TP53	17	7579311	7579311	C	A	TCGA-62-A46O-01A-11D-A24D-08	LUAD		17	7579311	7579311	C	A	NM_000546.6(TP53):c.375+1G>T	Pathogenic/Likely pathogenic	germline
TP53	17	7578257	7578257	C	A	TCGA-62-A46R-01A-11D-A24D-08	LUAD		17	7578257	7578257	C	A	NM_000546.6(TP53):c.592G>T (p.Glu198Ter)	Pathogenic	somatic
TP53	17	7578457	7578457	C	A	TCGA-63-5131-01A-01D-1441-08	LUSC		17	7578457	7578457	C	A	NM_000546.6(TP53):c.473G>T (p.Arg158Leu)	Pathogenic	germline
TP53	17	7578457	7578457	C	A	TCGA-63-6202-01A-11D-1817-08	LUSC		17	7578457	7578457	C	A	NM_000546.6(TP53):c.473G>T (p.Arg158Leu)	Pathogenic	germline
TP53	17	7577111	7577111	G	T	TCGA-63-7020-01A-11D-1945-08	LUSC		17	7577111	7577111	G	T	NM_000546.6(TP53):c.827C>A (p.Ala276Asp)	Likely pathogenic	germline
TP53	17	7574018	7574018	G	A	TCGA-63-A5M9-01A-11D-A26M-08	LUSC		17	7574018	7574018	G	A	NM_000546.6(TP53):c.1009C>T (p.Arg337Cys)	Pathogenic/Likely pathogenic	germline/somatic
TP53	17	7578413	7578413	C	T	TCGA-63-A5MH-01A-12D-A27K-08	LUSC		17	7578413	7578413	C	T	NM_000546.6(TP53):c.517G>A (p.Val173Met)	Pathogenic	germline/somatic
TP53	17	7578239	7578239	C	A	TCGA-63-A5MP-01A-11D-A26M-08	LUSC		17	7578239	7578239	C	A	NM_000546.6(TP53):c.610G>T (p.Glu204Ter)	Pathogenic	somatic
TP53	17	7579373	7579373	C	A	TCGA-63-A5MW-01A-11D-A26M-08	LUSC		17	7579373	7579373	C	A	NM_000546.6(TP53):c.314G>T (p.Gly105Val)	Likely pathogenic	somatic
TP53	17	7577120	7577120	C	G	TCGA-63-A5MY-01A-11D-A26M-08	LUSC		17	7577120	7577120	C	G	NM_000546.6(TP53):c.818G>C (p.Arg273Pro)	Pathogenic	germline/somatic
TP53	17	7577547	7577547	C	A	TCGA-64-1679-01A-21D-2063-08	LUAD		17	7577547	7577547	C	A	NM_000546.6(TP53):c.734G>T (p.Gly245Val)	Pathogenic	germline/somatic
TP53	17	7578392	7578392	C	T	TCGA-64-1681-01A-11D-2063-08	LUAD		17	7578392	7578392	C	T	NM_000546.6(TP53):c.538G>A (p.Glu180Lys)	Likely pathogenic	germline
TP53	17	7577565	7577565	T	C	TCGA-64-5778-01A-01D-1625-08	LUAD		17	7577565	7577565	T	C	NM_000546.6(TP53):c.716A>G (p.Asn239Ser)	Likely pathogenic	germline/somatic
TP53	17	7577580	7577580	T	C	TCGA-66-2727-01A-01D-0983-08	LUSC		17	7577580	7577580	T	C	NM_000546.6(TP53):c.701A>G (p.Tyr234Cys)	Pathogenic/Likely pathogenic	germline/somatic
TP53	17	7573982	7573982	C	A	TCGA-66-2742-01A-01D-0983-08	LUSC		17	7573982	7573982	C	A	NM_000546.6(TP53):c.1045G>T (p.Glu349Ter)	Pathogenic	germline/somatic
TP53	17	7578407	7578407	G	C	TCGA-66-2744-01A-01D-0983-08	LUSC		17	7578407	7578407	G	C	NM_000546.6(TP53):c.523C>G (p.Arg175Gly)	Pathogenic	germline/somatic
TP53	17	7577120	7577120	C	G	TCGA-66-2755-01A-01D-1522-08	LUSC		17	7577120	7577120	C	G	NM_000546.6(TP53):c.818G>C (p.Arg273Pro)	Pathogenic	germline/somatic
TP53	17	7578407	7578407	G	C	TCGA-66-2756-01A-01D-1522-08	LUSC		17	7578407	7578407	G	C	NM_000546.6(TP53):c.523C>G (p.Arg175Gly)	Pathogenic	germline/somatic
TP53	17	7579355	7579355	A	C	TCGA-66-2757-01A-01D-1522-08	LUSC		17	7579355	7579355	A	C	NM_000546.6(TP53):c.332T>G (p.Leu111Arg)	Likely pathogenic	somatic
TP53	17	7577538	7577538	C	A	TCGA-66-2777-01A-01D-1267-08	LUSC		17	7577538	7577538	C	A	NM_000546.6(TP53):c.743G>T (p.Arg248Leu)	Pathogenic	germline/somatic
TP53	17	7578458	7578458	G	C	TCGA-66-2786-01A-01D-1522-08	LUSC		17	7578458	7578458	G	C	NM_000546.6(TP53):c.472C>G (p.Arg158Gly)	Pathogenic	germline
TP53	17	7579311	7579311	C	A	TCGA-66-2788-01A-01D-0983-08	LUSC		17	7579311	7579311	C	A	NM_000546.6(TP53):c.375+1G>T	Pathogenic/Likely pathogenic	germline
TP53	17	7577547	7577547	C	A	TCGA-66-2791-01A-01D-0983-08	LUSC		17	7577547	7577547	C	A	NM_000546.6(TP53):c.734G>T (p.Gly245Val)	Pathogenic	germline/somatic
TP53	17	7577022	7577022	G	A	TCGA-66-2792-01A-01D-0983-08	LUSC		17	7577022	7577022	G	A	NM_000546.6(TP53):c.916C>T (p.Arg306Ter)	Pathogenic	germline/somatic
TP53	17	7578457	7578457	C	A	TCGA-66-2795-01A-02D-0983-08	LUSC		17	7578457	7578457	C	A	NM_000546.6(TP53):c.473G>T (p.Arg158Leu)	Pathogenic	germline
TP53	17	7577547	7577547	C	A	TCGA-66-2800-01A-01D-1267-08	LUSC		17	7577547	7577547	C	A	NM_000546.6(TP53):c.734G>T (p.Gly245Val)	Pathogenic	germline/somatic
TP53	17	7577120	7577120	C	A	TCGA-68-7757-01B-11D-2293-08	LUSC		17	7577120	7577120	C	A	NM_000546.6(TP53):c.818G>T (p.Arg273Leu)	Pathogenic	germline/somatic
TP53	17	7579377	7579377	G	A	TCGA-68-8250-01A-11D-2293-08	LUSC		17	7579377	7579377	G	A	NM_000546.6(TP53):c.310C>T (p.Gln104Ter)	Pathogenic	germline/somatic
TP53	17	7578431	7578431	G	A	TCGA-69-7765-01A-11D-2167-08	LUAD		17	7578431	7578431	G	A	NM_000546.6(TP53):c.499C>T (p.Gln167Ter)	Pathogenic/Likely pathogenic	germline
TP53	17	7574027	7574027	C	A	TCGA-69-7974-01A-11D-2184-08	LUAD		17	7574027	7574027	C	A	NM_000546.6(TP53):c.1000G>T (p.Gly334Trp)	Likely pathogenic	germline
TP53	17	7577097	7577097	C	A	TCGA-69-A59K-01A-11D-A25L-08	LUAD		17	7577097	7577097	C	A	NM_000546.6(TP53):c.841G>T (p.Asp281Tyr)	Pathogenic	germline/somatic
TP53	17	7579311	7579311	C	G	TCGA-70-6722-01A-11D-1817-08	LUSC		17	7579311	7579311	C	G	NM_000546.6(TP53):c.375+1G>C	Likely pathogenic	germline
TP53	17	7578370	7578370	C	A	TCGA-70-6723-01A-11D-1817-08	LUSC		17	7578370	7578370	C	A	NM_000546.6(TP53):c.559+1G>T	Likely pathogenic	germline/somatic
TP53	17	7577538	7577538	C	G	TCGA-73-4666-01A-01D-1265-08	LUAD		17	7577538	7577538	C	G	NM_000546.6(TP53):c.743G>C (p.Arg248Pro)	Pathogenic	germline/somatic
TP53	17	7577610	7577610	T	C	TCGA-73-4670-01A-01D-1265-08	LUAD		17	7577610	7577610	T	C	NM_000546.6(TP53):c.673-2A>G	Pathogenic	germline/somatic
TP53	17	7578403	7578403	C	A	TCGA-73-4676-01A-01D-1753-08	LUAD		17	7578403	7578403	C	A	NM_000546.6(TP53):c.527G>T (p.Cys176Phe)	Likely pathogenic	germline/somatic
TP53	17	7578263	7578263	G	A	TCGA-73-7499-01A-11D-2184-08	LUAD		17	7578263	7578263	G	A	NM_000546.6(TP53):c.586C>T (p.Arg196Ter)	Pathogenic	germline/somatic
TP53	17	7578211	7578211	C	T	TCGA-74-6573-01A-12D-1845-08	GBM		17	7578211	7578211	C	T	NM_000546.6(TP53):c.638G>A (p.Arg213Gln)	Pathogenic	germline/somatic
TP53	17	7578442	7578442	T	C	TCGA-75-5147-01A-01D-1625-08	LUAD		17	7578442	7578442	T	C	NM_000546.6(TP53):c.488A>G (p.Tyr163Cys)	Pathogenic	germline/somatic
TP53	17	7578275	7578275	G	A	TCGA-75-6207-01A-11D-1753-08	LUAD		17	7578275	7578275	G	A	NM_000546.6(TP53):c.574C>T (p.Gln192Ter)	Pathogenic	germline
TP53	17	7577535	7577535	C	G	TCGA-76-4925-01A-01D-1486-08	GBM		17	7577535	7577535	C	G	NM_000546.6(TP53):c.746G>C (p.Arg249Thr)	Pathogenic	germline/somatic
TP53	17	7574003	7574003	G	A	TCGA-76-4929-01A-01D-1486-08	GBM		17	7574003	7574003	G	A	NM_000546.6(TP53):c.1024C>T (p.Arg342Ter)	Pathogenic	germline/somatic
TP53	17	7577120	7577120	C	T	TCGA-76-4934-01A-01D-1486-08	GBM		17	7577120	7577120	C	T	NM_000546.6(TP53):c.818G>A (p.Arg273His)	Pathogenic	germline/somatic
TP53	17	7577551	7577551	C	T	TCGA-76-6193-01A-11D-1696-08	GBM		17	7577551	7577551	C	T	NM_000546.6(TP53):c.730G>A (p.Gly244Ser)	Pathogenic	germline/somatic
TP53	17	7578457	7578457	C	T	TCGA-76-6283-01A-11D-1845-08	GBM		17	7578457	7578457	C	T	NM_000546.6(TP53):c.473G>A (p.Arg158His)	Pathogenic/Likely pathogenic	germline
TP53	17	7577580	7577580	T	C	TCGA-76-6286-01A-11D-1845-08	GBM		17	7577580	7577580	T	C	NM_000546.6(TP53):c.701A>G (p.Tyr234Cys)	Pathogenic/Likely pathogenic	germline/somatic
TP53	17	7577538	7577538	C	A	TCGA-76-6663-01A-11D-1845-08	GBM		17	7577538	7577538	C	A	NM_000546.6(TP53):c.743G>T (p.Arg248Leu)	Pathogenic	germline/somatic
TP53	17	7577539	7577539	G	A	TCGA-76-6664-01A-11D-1845-08	GBM		17	7577539	7577539	G	A	NM_000546.6(TP53):c.742C>T (p.Arg248Trp)	Pathogenic	germline/somatic
TP53	17	7577609	7577609	C	T	TCGA-77-6844-01A-11D-1945-08	LUSC		17	7577609	7577609	C	T	NM_000546.6(TP53):c.673-1G>A	Pathogenic	germline
TP53	17	7577142	7577142	C	A	TCGA-77-6845-01A-11D-1945-08	LUSC		17	7577142	7577142	C	A	NM_000546.6(TP53):c.796G>T (p.Gly266Ter)	Pathogenic	germline
TP53	17	7577580	7577580	T	C	TCGA-77-7335-01A-11D-2042-08	LUSC		17	7577580	7577580	T	C	NM_000546.6(TP53):c.701A>G (p.Tyr234Cys)	Pathogenic/Likely pathogenic	germline/somatic
TP53	17	7578370	7578370	C	A	TCGA-77-7463-01A-11D-2042-08	LUSC		17	7578370	7578370	C	A	NM_000546.6(TP53):c.559+1G>T	Likely pathogenic	germline/somatic
TP53	17	7577548	7577548	C	A	TCGA-77-7465-01A-11D-2042-08	LUSC		17	7577548	7577548	C	A	NM_000546.6(TP53):c.733G>T (p.Gly245Cys)	Pathogenic	germline/somatic
TP53	17	7576928	7576928	T	C	TCGA-77-8008-01A-21D-2184-08	LUSC		17	7576928	7576928	T	C	NM_000546.6(TP53):c.920-2A>G	Pathogenic/Likely pathogenic	germline/somatic
TP53	17	7577025	7577025	T	A	TCGA-77-8130-01A-11D-2244-08	LUSC		17	7577025	7577025	T	A	NM_000546.6(TP53):c.913A>T (p.Lys305Ter)	Pathogenic	germline
TP53	17	7577539	7577539	G	A	TCGA-77-8133-01A-12D-2244-08	LUSC		17	7577539	7577539	G	A	NM_000546.6(TP53):c.742C>T (p.Arg248Trp)	Pathogenic	germline/somatic
TP53	17	7578406	7578406	C	T	TCGA-77-8138-01A-11D-2244-08	LUSC		17	7578406	7578406	C	T	NM_000546.6(TP53):c.524G>A (p.Arg175His)	Pathogenic	germline/somatic
TP53	17	7579373	7579373	C	A	TCGA-77-8139-01A-11D-2244-08	LUSC		17	7579373	7579373	C	A	NM_000546.6(TP53):c.314G>T (p.Gly105Val)	Likely pathogenic	somatic
TP53	17	7577570	7577570	C	T	TCGA-77-8140-01A-11D-2244-08	LUSC		17	7577570	7577570	C	T	NM_000546.6(TP53):c.711G>A (p.Met237Ile)	Pathogenic	germline/somatic
TP53	17	7577058	7577058	C	A	TCGA-77-8144-01A-11D-2244-08	LUSC		17	7577058	7577058	C	A	NM_000546.6(TP53):c.880G>T (p.Glu294Ter)	Pathogenic	germline/somatic
TP53	17	7578208	7578208	T	C	TCGA-77-8144-01A-11D-2244-08	LUSC		17	7578208	7578208	T	C	NM_000546.6(TP53):c.641A>G (p.His214Arg)	Likely pathogenic	germline/somatic
TP53	17	7578413	7578413	C	A	TCGA-77-8148-01A-11D-2244-08	LUSC		17	7578413	7578413	C	A	NM_000546.6(TP53):c.517G>T (p.Val173Leu)	Pathogenic	germline/somatic
TP53	17	7578508	7578508	C	T	TCGA-77-8148-01A-11D-2244-08	LUSC		17	7578508	7578508	C	T	NM_000546.6(TP53):c.422G>A (p.Cys141Tyr)	Pathogenic	germline/somatic
TP53	17	7577580	7577580	T	C	TCGA-77-8150-01A-11D-2244-08	LUSC		17	7577580	7577580	T	C	NM_000546.6(TP53):c.701A>G (p.Tyr234Cys)	Pathogenic/Likely pathogenic	germline/somatic
TP53	17	7577538	7577538	C	A	TCGA-77-A5G3-01A-31D-A27K-08	LUSC		17	7577538	7577538	C	A	NM_000546.6(TP53):c.743G>T (p.Arg248Leu)	Pathogenic	germline/somatic
TP53	17	7577548	7577548	C	A	TCGA-77-A5G3-01A-31D-A27K-08	LUSC		17	7577548	7577548	C	A	NM_000546.6(TP53):c.733G>T (p.Gly245Cys)	Pathogenic	germline/somatic
TP53	17	7577113	7577113	A	C	TCGA-77-A5G8-01B-11D-A27K-08	LUSC		17	7577113	7577113	A	C	NM_000546.6(TP53):c.825T>G (p.Cys275Trp)	Likely pathogenic	germline/somatic
TP53	17	7578442	7578442	T	C	TCGA-77-A5GA-01A-11D-A27K-08	LUSC		17	7578442	7578442	T	C	NM_000546.6(TP53):c.488A>G (p.Tyr163Cys)	Pathogenic	germline/somatic
TP53	17	7573982	7573982	C	A	TCGA-77-A5GB-01B-11D-A27K-08	LUSC		17	7573982	7573982	C	A	NM_000546.6(TP53):c.1045G>T (p.Glu349Ter)	Pathogenic	germline/somatic
TP53	17	7578457	7578457	C	A	TCGA-77-A5GH-01A-11D-A27K-08	LUSC		17	7578457	7578457	C	A	NM_000546.6(TP53):c.473G>T (p.Arg158Leu)	Pathogenic	germline
TP53	17	7577538	7577538	C	A	TCGA-78-7149-01A-11D-2036-08	LUAD		17	7577538	7577538	C	A	NM_000546.6(TP53):c.743G>T (p.Arg248Leu)	Pathogenic	germline/somatic
TP53	17	7578457	7578457	C	A	TCGA-78-7150-01A-21D-2036-08	LUAD		17	7578457	7578457	C	A	NM_000546.6(TP53):c.473G>T (p.Arg158Leu)	Pathogenic	germline
TP53	17	7574017	7574017	C	A	TCGA-78-7155-01A-11D-2036-08	LUAD		17	7574017	7574017	C	A	NM_000546.6(TP53):c.1010G>T (p.Arg337Leu)	Likely pathogenic	germline/somatic
TP53	17	7578275	7578275	G	A	TCGA-78-7535-01A-11D-2063-08	LUAD		17	7578275	7578275	G	A	NM_000546.6(TP53):c.574C>T (p.Gln192Ter)	Pathogenic	germline
TP53	17	7577129	7577129	A	C	TCGA-78-7536-01A-11D-2063-08	LUAD		17	7577129	7577129	A	C	NM_000546.6(TP53):c.809T>G (p.Phe270Cys)	Likely pathogenic	somatic
TP53	17	7577121	7577121	G	A	TCGA-78-7540-01A-11D-2063-08	LUAD		17	7577121	7577121	G	A	NM_000546.6(TP53):c.817C>T (p.Arg273Cys)	Pathogenic/Likely pathogenic	germline/somatic
TP53	17	7578437	7578437	G	A	TCGA-78-8662-01A-11D-2393-08	LUAD		17	7578437	7578437	G	A	NM_000546.6(TP53):c.493C>T (p.Gln165Ter)	Pathogenic	germline/somatic
TP53	17	7577114	7577114	C	A	TCGA-83-5908-01A-21D-2284-08	LUAD		17	7577114	7577114	C	A	NM_000546.6(TP53):c.824G>T (p.Cys275Phe)	Likely pathogenic	somatic
TP53	17	7578190	7578190	T	C	TCGA-85-6798-01A-11D-1945-08	LUSC		17	7578190	7578190	T	C	NM_000546.6(TP53):c.659A>G (p.Tyr220Cys)	Pathogenic	germline/somatic
TP53	17	7578370	7578370	C	T	TCGA-85-7699-01A-11D-2122-08	LUSC		17	7578370	7578370	C	T	NM_000546.6(TP53):c.559+1G>A	Pathogenic/Likely pathogenic	germline
TP53	17	7578457	7578457	C	A	TCGA-85-7699-01A-11D-2122-08	LUSC		17	7578457	7578457	C	A	NM_000546.6(TP53):c.473G>T (p.Arg158Leu)	Pathogenic	germline
TP53	17	7579414	7579414	C	T	TCGA-85-8048-01A-11D-2244-08	LUSC		17	7579414	7579414	C	T	NM_000546.6(TP53):c.273G>A (p.Trp91Ter)	Pathogenic	germline/somatic
TP53	17	7577551	7577551	C	T	TCGA-85-8052-01A-11D-2244-08	LUSC		17	7577551	7577551	C	T	NM_000546.6(TP53):c.730G>A (p.Gly244Ser)	Pathogenic	germline/somatic
TP53	17	7576928	7576928	T	C	TCGA-85-8070-01A-11D-2244-08	LUSC		17	7576928	7576928	T	C	NM_000546.6(TP53):c.920-2A>G	Pathogenic/Likely pathogenic	germline/somatic
TP53	17	7577102	7577102	C	T	TCGA-85-8072-01A-31D-2244-08	LUSC		17	7577102	7577102	C	T	NM_000546.6(TP53):c.836G>A (p.Gly279Glu)	Pathogenic/Likely pathogenic	germline/somatic
TP53	17	7578475	7578475	G	A	TCGA-85-8072-01A-31D-2244-08	LUSC		17	7578475	7578475	G	A	NM_000546.6(TP53):c.455C>T (p.Pro152Leu)	Pathogenic	germline/somatic
TP53	17	7578406	7578406	C	T	TCGA-85-8277-01A-11D-2293-08	LUSC		17	7578406	7578406	C	T	NM_000546.6(TP53):c.524G>A (p.Arg175His)	Pathogenic	germline/somatic
TP53	17	7578395	7578395	G	A	TCGA-85-8351-01A-11D-2293-08	LUSC		17	7578395	7578395	G	A	NM_000546.6(TP53):c.535C>T (p.His179Tyr)	Pathogenic/Likely pathogenic	germline/somatic
TP53	17	7577046	7577046	C	A	TCGA-85-8353-01A-21D-2293-08	LUSC		17	7577046	7577046	C	A	NM_000546.6(TP53):c.892G>T (p.Glu298Ter)	Pathogenic	germline/somatic
TP53	17	7577046	7577046	C	A	TCGA-85-8481-01A-11D-2323-08	LUSC		17	7577046	7577046	C	A	NM_000546.6(TP53):c.892G>T (p.Glu298Ter)	Pathogenic	germline/somatic
TP53	17	7577094	7577094	G	A	TCGA-85-8582-01A-21D-2395-08	LUSC		17	7577094	7577094	G	A	NM_000546.6(TP53):c.844C>T (p.Arg282Trp)	Pathogenic/Likely pathogenic	germline/somatic
TP53	17	7577094	7577094	G	A	TCGA-85-8664-01A-11D-2395-08	LUSC		17	7577094	7577094	G	A	NM_000546.6(TP53):c.844C>T (p.Arg282Trp)	Pathogenic/Likely pathogenic	germline/somatic
TP53	17	7577120	7577120	C	A	TCGA-85-A4QQ-01A-41D-A25L-08	LUSC		17	7577120	7577120	C	A	NM_000546.6(TP53):c.818G>T (p.Arg273Leu)	Pathogenic	germline/somatic
TP53	17	7577586	7577586	A	G	TCGA-85-A4QR-01A-11D-A257-08	LUSC		17	7577586	7577586	A	G	NM_000546.6(TP53):c.695T>C (p.Ile232Thr)	Likely pathogenic	germline
TP53	17	7579389	7579389	G	A	TCGA-85-A50M-01A-21D-A25L-08	LUSC		17	7579389	7579389	G	A	NM_000546.6(TP53):c.298C>T (p.Gln100Ter)	Pathogenic	somatic
TP53	17	7577551	7577551	C	T	TCGA-85-A50Z-01A-21D-A25L-08	LUSC		17	7577551	7577551	C	T	NM_000546.6(TP53):c.730G>A (p.Gly244Ser)	Pathogenic	germline/somatic
TP53	17	7577568	7577568	C	A	TCGA-85-A511-01A-21D-A25L-08	LUSC		17	7577568	7577568	C	A	NM_000546.6(TP53):c.713G>T (p.Cys238Phe)	Pathogenic	germline/somatic
TP53	17	7577058	7577058	C	A	TCGA-86-7701-01A-11D-2167-08	LUAD		17	7577058	7577058	C	A	NM_000546.6(TP53):c.880G>T (p.Glu294Ter)	Pathogenic	germline/somatic
TP53	17	7578403	7578403	C	A	TCGA-86-7711-01A-11D-2063-08	LUAD		17	7578403	7578403	C	A	NM_000546.6(TP53):c.527G>T (p.Cys176Phe)	Likely pathogenic	germline/somatic
TP53	17	7577538	7577538	C	A	TCGA-86-7954-01A-11D-2184-08	LUAD		17	7577538	7577538	C	A	NM_000546.6(TP53):c.743G>T (p.Arg248Leu)	Pathogenic	germline/somatic
TP53	17	7578275	7578275	G	A	TCGA-86-8073-01A-11D-2238-08	LUAD		17	7578275	7578275	G	A	NM_000546.6(TP53):c.574C>T (p.Gln192Ter)	Pathogenic	germline
TP53	17	7578190	7578190	T	C	TCGA-86-8074-01A-11D-2238-08	LUAD		17	7578190	7578190	T	C	NM_000546.6(TP53):c.659A>G (p.Tyr220Cys)	Pathogenic	germline/somatic
TP53	17	7578556	7578556	T	C	TCGA-86-8075-01A-11D-2238-08	LUAD		17	7578556	7578556	T	C	NM_000546.6(TP53):c.376-2A>G	Likely pathogenic	germline/somatic
TP53	17	7578271	7578271	T	C	TCGA-86-8279-01A-11D-2284-08	LUAD		17	7578271	7578271	T	C	NM_000546.6(TP53):c.578A>G (p.His193Arg)	Pathogenic/Likely pathogenic	germline/somatic
TP53	17	7578271	7578271	T	G	TCGA-86-8280-01A-11D-2284-08	LUAD		17	7578271	7578271	T	G	NM_000546.6(TP53):c.578A>C (p.His193Pro)	Pathogenic	germline/somatic
TP53	17	7577538	7577538	C	A	TCGA-86-8673-01A-11D-2393-08	LUAD		17	7577538	7577538	C	A	NM_000546.6(TP53):c.743G>T (p.Arg248Leu)	Pathogenic	germline/somatic
TP53	17	7577082	7577082	C	T	TCGA-86-A4P7-01A-11D-A24P-08	LUAD		17	7577082	7577082	C	T	NM_000546.6(TP53):c.856G>A (p.Glu286Lys)	Pathogenic	germline/somatic
TP53	17	7577538	7577538	C	T	TCGA-90-7767-01A-11D-2122-08	LUSC		17	7577538	7577538	C	T	NM_000546.6(TP53):c.743G>A (p.Arg248Gln)	Pathogenic	germline/somatic
TP53	17	7578272	7578272	G	A	TCGA-90-7769-01A-11D-2122-08	LUSC		17	7578272	7578272	G	A	NM_000546.6(TP53):c.577C>T (p.His193Tyr)	Pathogenic/Likely pathogenic	germline/somatic
TP53	17	7578457	7578457	C	A	TCGA-90-A4EE-01A-11D-A257-08	LUSC		17	7578457	7578457	C	A	NM_000546.6(TP53):c.473G>T (p.Arg158Leu)	Pathogenic	germline
TP53	17	7578190	7578190	T	C	TCGA-91-6840-01A-11D-1945-08	LUAD		17	7578190	7578190	T	C	NM_000546.6(TP53):c.659A>G (p.Tyr220Cys)	Pathogenic	germline/somatic
TP53	17	7579358	7579358	C	A	TCGA-91-6847-01A-11D-1945-08	LUAD		17	7579358	7579358	C	A	NM_000546.6(TP53):c.329G>T (p.Arg110Leu)	Pathogenic/Likely pathogenic	germline/somatic
TP53	17	7576852	7576852	C	A	TCGA-91-A4BC-01A-11D-A24D-08	LUAD		17	7576852	7576852	C	A	NM_000546.6(TP53):c.993+1G>T	Pathogenic	germline/somatic
TP53	17	7574003	7574003	G	A	TCGA-92-8065-01A-11D-2244-08	LUSC		17	7574003	7574003	G	A	NM_000546.6(TP53):c.1024C>T (p.Arg342Ter)	Pathogenic	germline/somatic
TP53	17	7577085	7577085	C	T	TCGA-93-8067-01A-11D-2284-08	LUAD		17	7577085	7577085	C	T	NM_000546.6(TP53):c.853G>A (p.Glu285Lys)	Pathogenic/Likely pathogenic	germline/somatic
TP53	17	7577509	7577509	C	A	TCGA-93-A4JP-01A-11D-A24P-08	LUAD		17	7577509	7577509	C	A	NM_000546.6(TP53):c.772G>T (p.Glu258Ter)	Pathogenic	germline/somatic
TP53	17	7577548	7577548	C	A	TCGA-94-7943-01A-11D-2184-08	LUSC		17	7577548	7577548	C	A	NM_000546.6(TP53):c.733G>T (p.Gly245Cys)	Pathogenic	germline/somatic
TP53	17	7577094	7577094	G	A	TCGA-94-8491-01A-11D-2323-08	LUSC		17	7577094	7577094	G	A	NM_000546.6(TP53):c.844C>T (p.Arg282Trp)	Pathogenic/Likely pathogenic	germline/somatic
TP53	17	7577538	7577538	C	T	TCGA-94-A4VJ-01A-11D-A257-08	LUSC		17	7577538	7577538	C	T	NM_000546.6(TP53):c.743G>A (p.Arg248Gln)	Pathogenic	germline/somatic
TP53	17	7579311	7579311	C	T	TCGA-94-A5I6-01A-21D-A27K-08	LUSC		17	7579311	7579311	C	T	NM_000546.6(TP53):c.375+1G>A	Pathogenic/Likely pathogenic	germline/somatic
TP53	17	7577120	7577120	C	A	TCGA-95-7039-01A-11D-1945-08	LUAD		17	7577120	7577120	C	A	NM_000546.6(TP53):c.818G>T (p.Arg273Leu)	Pathogenic	germline/somatic
TP53	17	7578457	7578457	C	A	TCGA-95-7043-01A-11D-1945-08	LUAD		17	7578457	7578457	C	A	NM_000546.6(TP53):c.473G>T (p.Arg158Leu)	Pathogenic	germline
TP53	17	7579591	7579591	C	A	TCGA-95-7562-01A-11D-2238-08	LUAD		17	7579591	7579591	C	A	NM_000546.6(TP53):c.97-1G>T	Likely pathogenic	germline
TP53	17	7578443	7578443	A	C	TCGA-95-7944-01A-11D-2184-08	LUAD		17	7578443	7578443	A	C	NM_000546.6(TP53):c.487T>G (p.Tyr163Asp)	Likely pathogenic	germline/somatic
TP53	17	7578235	7578235	T	C	TCGA-95-7947-01A-11D-2184-08	LUAD		17	7578235	7578235	T	C	NM_000546.6(TP53):c.614A>G (p.Tyr205Cys)	Likely pathogenic	germline/somatic
TP53	17	7578457	7578457	C	A	TCGA-96-7544-01A-11D-2042-08	LUSC		17	7578457	7578457	C	A	NM_000546.6(TP53):c.473G>T (p.Arg158Leu)	Pathogenic	germline
TP53	17	7577082	7577082	C	T	TCGA-96-7545-01A-21D-2042-08	LUSC		17	7577082	7577082	C	T	NM_000546.6(TP53):c.856G>A (p.Glu286Lys)	Pathogenic	germline/somatic
TP53	17	7576897	7576897	G	A	TCGA-96-8169-01A-11D-2293-08	LUSC		17	7576897	7576897	G	A	NM_000546.6(TP53):c.949C>T (p.Gln317Ter)	Pathogenic/Likely pathogenic	germline
TP53	17	7578457	7578457	C	A	TCGA-96-A4JK-01A-11D-A257-08	LUSC		17	7578457	7578457	C	A	NM_000546.6(TP53):c.473G>T (p.Arg158Leu)	Pathogenic	germline
TP53	17	7577094	7577094	G	A	TCGA-97-7553-01A-21D-2036-08	LUAD		17	7577094	7577094	G	A	NM_000546.6(TP53):c.844C>T (p.Arg282Trp)	Pathogenic/Likely pathogenic	germline/somatic
TP53	17	7577547	7577547	C	A	TCGA-97-7937-01A-11D-2167-08	LUAD		17	7577547	7577547	C	A	NM_000546.6(TP53):c.734G>T (p.Gly245Val)	Pathogenic	germline/somatic
TP53	17	7579310	7579310	A	T	TCGA-97-7938-01A-11D-2167-08	LUAD		17	7579310	7579310	A	T	NM_000546.6(TP53):c.375+2T>A	Pathogenic/Likely pathogenic	germline
TP53	17	7578272	7578272	G	T	TCGA-97-8175-01A-11D-2284-08	LUAD		17	7578272	7578272	G	T	NM_000546.6(TP53):c.577C>A (p.His193Asn)	Likely pathogenic	somatic
TP53	17	7577120	7577120	C	A	TCGA-97-8179-01A-11D-2284-08	LUAD		17	7577120	7577120	C	A	NM_000546.6(TP53):c.818G>T (p.Arg273Leu)	Pathogenic	germline/somatic
TP53	17	7576852	7576852	C	T	TCGA-97-8547-01A-11D-2393-08	LUAD		17	7576852	7576852	C	T	NM_000546.6(TP53):c.993+1G>A	Pathogenic	germline/somatic
TP53	17	7577539	7577539	G	A	TCGA-98-8020-01A-11D-2244-08	LUSC		17	7577539	7577539	G	A	NM_000546.6(TP53):c.742C>T (p.Arg248Trp)	Pathogenic	germline/somatic
TP53	17	7578403	7578403	C	A	TCGA-98-8020-01A-11D-2244-08	LUSC		17	7578403	7578403	C	A	NM_000546.6(TP53):c.527G>T (p.Cys176Phe)	Likely pathogenic	germline/somatic
TP53	17	7577120	7577120	C	A	TCGA-98-8023-01A-11D-2244-08	LUSC		17	7577120	7577120	C	A	NM_000546.6(TP53):c.818G>T (p.Arg273Leu)	Pathogenic	germline/somatic
TP53	17	7578176	7578176	C	T	TCGA-98-A53B-01A-11D-A25L-08	LUSC		17	7578176	7578176	C	T	NM_000546.6(TP53):c.672+1G>A	Pathogenic	germline
TP53	17	7577094	7577094	G	A	TCGA-98-A53J-01A-11D-A26M-08	LUSC		17	7577094	7577094	G	A	NM_000546.6(TP53):c.844C>T (p.Arg282Trp)	Pathogenic/Likely pathogenic	germline/somatic
TP53	17	7578290	7578290	C	T	TCGA-99-7458-01A-11D-2036-08	LUAD		17	7578290	7578290	C	T	NM_000546.6(TP53):c.560-1G>A	Pathogenic	germline/somatic
TP53	17	7578413	7578413	C	A	TCGA-99-8025-01A-11D-2238-08	LUAD		17	7578413	7578413	C	A	NM_000546.6(TP53):c.517G>T (p.Val173Leu)	Pathogenic	germline/somatic
TP53	17	7577046	7577046	C	A	TCGA-99-8033-01A-11D-2238-08	LUAD		17	7577046	7577046	C	A	NM_000546.6(TP53):c.892G>T (p.Glu298Ter)	Pathogenic	germline/somatic
TP53	17	7578406	7578406	C	T	TCGA-A1-A0SI-01A-11D-A142-09	BRCA		17	7578406	7578406	C	T	NM_000546.6(TP53):c.524G>A (p.Arg175His)	Pathogenic	germline/somatic
TP53	17	7578190	7578190	T	C	TCGA-A1-A0SO-01A-22D-A099-09	BRCA		17	7578190	7578190	T	C	NM_000546.6(TP53):c.659A>G (p.Tyr220Cys)	Pathogenic	germline/somatic
TP53	17	7578382	7578382	G	C	TCGA-A1-A0SP-01A-11D-A099-09	BRCA		17	7578382	7578382	G	C	NM_000546.6(TP53):c.548C>G (p.Ser183Ter)	Pathogenic	germline/somatic
TP53	17	7577124	7577124	C	T	TCGA-A2-A04W-01A-31D-A10Y-09	BRCA		17	7577124	7577124	C	T	NM_000546.6(TP53):c.814G>A (p.Val272Met)	Pathogenic	germline/somatic
TP53	17	7577120	7577120	C	A	TCGA-A2-A0CL-01A-11D-A10Y-09	BRCA		17	7577120	7577120	C	A	NM_000546.6(TP53):c.818G>T (p.Arg273Leu)	Pathogenic	germline/somatic
TP53	17	7578263	7578263	G	A	TCGA-A2-A0CW-01A-21D-A10Y-09	BRCA		17	7578263	7578263	G	A	NM_000546.6(TP53):c.586C>T (p.Arg196Ter)	Pathogenic	germline/somatic
TP53	17	7578442	7578442	T	C	TCGA-A2-A0ST-01A-12D-A099-09	BRCA		17	7578442	7578442	T	C	NM_000546.6(TP53):c.488A>G (p.Tyr163Cys)	Pathogenic	germline/somatic
TP53	17	7578253	7578253	C	A	TCGA-A2-A0SX-01A-12D-A099-09	BRCA		17	7578253	7578253	C	A	NM_000546.6(TP53):c.596G>T (p.Gly199Val)	Likely pathogenic	germline
TP53	17	7577121	7577121	G	A	TCGA-A2-A0T1-01A-21D-A099-09	BRCA		17	7577121	7577121	G	A	NM_000546.6(TP53):c.817C>T (p.Arg273Cys)	Pathogenic/Likely pathogenic	germline/somatic
TP53	17	7579311	7579311	C	A	TCGA-A2-A0YG-01A-21D-A10G-09	BRCA		17	7579311	7579311	C	A	NM_000546.6(TP53):c.375+1G>T	Pathogenic/Likely pathogenic	germline
TP53	17	7574003	7574003	G	A	TCGA-A2-A0YJ-01A-11D-A10G-09	BRCA		17	7574003	7574003	G	A	NM_000546.6(TP53):c.1024C>T (p.Arg342Ter)	Pathogenic	germline/somatic
TP53	17	7577609	7577609	C	T	TCGA-A2-A1G1-01A-21D-A13L-09	BRCA		17	7577609	7577609	C	T	NM_000546.6(TP53):c.673-1G>A	Pathogenic	germline
TP53	17	7578527	7578527	A	G	TCGA-A2-A3XT-01A-11D-A22X-09	BRCA		17	7578527	7578527	A	G	NM_000546.6(TP53):c.403T>C (p.Cys135Arg)	Pathogenic	germline/somatic
TP53	17	7574003	7574003	G	A	TCGA-A2-A3Y0-01A-11D-A23C-09	BRCA		17	7574003	7574003	G	A	NM_000546.6(TP53):c.1024C>T (p.Arg342Ter)	Pathogenic	germline/somatic
TP53	17	7577098	7577098	T	G	TCGA-A2-A4S1-01A-21D-A25Q-09	BRCA		17	7577098	7577098	T	G	NM_000546.6(TP53):c.840A>C (p.Arg280Ser)	Likely pathogenic	somatic
TP53	17	7577559	7577559	G	C	TCGA-A4-A57E-01A-11D-A26P-10	KIRP		17	7577559	7577559	G	C	NM_000546.6(TP53):c.722C>G (p.Ser241Cys)	Likely pathogenic	germline/somatic
TP53	17	7577539	7577539	G	A	TCGA-A5-A0R6-01A-11D-A10B-09	UCEC		17	7577539	7577539	G	A	NM_000546.6(TP53):c.742C>T (p.Arg248Trp)	Pathogenic	germline/somatic
TP53	17	7578212	7578212	G	A	TCGA-A5-A0VP-01A-21D-A10B-09	UCEC		17	7578212	7578212	G	A	NM_000546.6(TP53):c.637C>T (p.Arg213Ter)	Pathogenic	germline/somatic
TP53	17	7577120	7577120	C	T	TCGA-A5-A2K4-01A-11D-A18P-09	UCEC		17	7577120	7577120	C	T	NM_000546.6(TP53):c.818G>A (p.Arg273His)	Pathogenic	germline/somatic
TP53	17	7577120	7577120	C	T	TCGA-A5-A3LP-01A-11D-A228-09	UCEC		17	7577120	7577120	C	T	NM_000546.6(TP53):c.818G>A (p.Arg273His)	Pathogenic	germline/somatic
TP53	17	7578235	7578235	T	C	TCGA-A5-A7WK-01A-11D-A34Q-09	UCEC		17	7578235	7578235	T	C	NM_000546.6(TP53):c.614A>G (p.Tyr205Cys)	Likely pathogenic	germline/somatic
TP53	17	7578212	7578212	G	A	TCGA-A6-2674-01A-02D-A270-10	COAD		17	7578212	7578212	G	A	NM_000546.6(TP53):c.637C>T (p.Arg213Ter)	Pathogenic	germline/somatic
TP53	17	7578257	7578257	C	A	TCGA-A6-2675-01A-02D-1719-10	COAD		17	7578257	7578257	C	A	NM_000546.6(TP53):c.592G>T (p.Glu198Ter)	Pathogenic	somatic
TP53	17	7578413	7578413	C	A	TCGA-A6-2684-01A-01D-A270-10	COAD		17	7578413	7578413	C	A	NM_000546.6(TP53):c.517G>T (p.Val173Leu)	Pathogenic	germline/somatic
TP53	17	7578212	7578212	G	A	TCGA-A6-2685-01A-01D-1408-10	COAD		17	7578212	7578212	G	A	NM_000546.6(TP53):c.637C>T (p.Arg213Ter)	Pathogenic	germline/somatic
TP53	17	7577539	7577539	G	A	TCGA-A6-3810-01A-01D-A270-10	COAD		17	7577539	7577539	G	A	NM_000546.6(TP53):c.742C>T (p.Arg248Trp)	Pathogenic	germline/somatic
TP53	17	7577538	7577538	C	T	TCGA-A6-5667-01A-21D-1719-10	COAD		17	7577538	7577538	C	T	NM_000546.6(TP53):c.743G>A (p.Arg248Gln)	Pathogenic	germline/somatic
TP53	17	7577121	7577121	G	A	TCGA-A6-6138-01A-11D-1771-10	COAD		17	7577121	7577121	G	A	NM_000546.6(TP53):c.817C>T (p.Arg273Cys)	Pathogenic/Likely pathogenic	germline/somatic
TP53	17	7577538	7577538	C	T	TCGA-A6-6142-01A-11D-1771-10	COAD		17	7577538	7577538	C	T	NM_000546.6(TP53):c.743G>A (p.Arg248Gln)	Pathogenic	germline/somatic
TP53	17	7577538	7577538	C	T	TCGA-A6-6651-01A-21D-1835-10	COAD		17	7577538	7577538	C	T	NM_000546.6(TP53):c.743G>A (p.Arg248Gln)	Pathogenic	germline/somatic
TP53	17	7577120	7577120	C	T	TCGA-A6-A567-01A-31D-A28G-10	COAD		17	7577120	7577120	C	T	NM_000546.6(TP53):c.818G>A (p.Arg273His)	Pathogenic	germline/somatic
TP53	17	7578265	7578265	A	G	TCGA-A7-A0DA-01A-31D-A10Y-09	BRCA		17	7578265	7578265	A	G	NM_000546.6(TP53):c.584T>C (p.Ile195Thr)	Pathogenic	germline/somatic
TP53	17	7578188	7578188	C	A	TCGA-A7-A13D-01A-13D-A272-09	BRCA		17	7578188	7578188	C	A	NM_000546.6(TP53):c.661G>T (p.Glu221Ter)	Pathogenic	germline/somatic
TP53	17	7578406	7578406	C	T	TCGA-A7-A13E-01A-11D-A272-09	BRCA		17	7578406	7578406	C	T	NM_000546.6(TP53):c.524G>A (p.Arg175His)	Pathogenic	germline/somatic
TP53	17	7578403	7578403	C	A	TCGA-A7-A26F-01A-21D-A167-09	BRCA		17	7578403	7578403	C	A	NM_000546.6(TP53):c.527G>T (p.Cys176Phe)	Likely pathogenic	germline/somatic
TP53	17	7577141	7577141	C	T	TCGA-A7-A26I-01A-11D-A167-09	BRCA		17	7577141	7577141	C	T	NM_000546.6(TP53):c.797G>A (p.Gly266Glu)	Pathogenic/Likely pathogenic	germline/somatic
TP53	17	7577570	7577570	C	T	TCGA-A7-A4SD-01A-11D-A25Q-09	BRCA		17	7577570	7577570	C	T	NM_000546.6(TP53):c.711G>A (p.Met237Ile)	Pathogenic	germline/somatic
TP53	17	7577156	7577156	C	A	TCGA-A7-A4SE-01A-11D-A25Q-09	BRCA		17	7577156	7577156	C	A	NM_000546.6(TP53):c.783-1G>T	Likely pathogenic	germline/somatic
TP53	17	7578370	7578370	C	A	TCGA-A8-A075-01A-11D-A099-09	BRCA		17	7578370	7578370	C	A	NM_000546.6(TP53):c.559+1G>T	Likely pathogenic	germline/somatic
TP53	17	7577548	7577548	C	T	TCGA-AA-3511-01A-21D-1835-10	COAD		17	7577548	7577548	C	T	NM_000546.6(TP53):c.733G>A (p.Gly245Ser)	Pathogenic	germline/somatic
TP53	17	7577120	7577120	C	T	TCGA-AA-3655-01A-02D-1719-10	COAD		17	7577120	7577120	C	T	NM_000546.6(TP53):c.818G>A (p.Arg273His)	Pathogenic	germline/somatic
TP53	17	7577120	7577120	C	T	TCGA-AA-3660-01A-01D-1719-10	COAD		17	7577120	7577120	C	T	NM_000546.6(TP53):c.818G>A (p.Arg273His)	Pathogenic	germline/somatic
TP53	17	7578403	7578403	C	T	TCGA-AA-3662-01A-01D-1719-10	COAD		17	7578403	7578403	C	T	NM_000546.6(TP53):c.527G>A (p.Cys176Tyr)	Pathogenic	germline/somatic
TP53	17	7578205	7578205	C	A	TCGA-AC-A2BK-01A-11D-A21Q-09	BRCA		17	7578205	7578205	C	A	NM_000546.6(TP53):c.644G>T (p.Ser215Ile)	Pathogenic	germline/somatic
TP53	17	7577097	7577097	C	A	TCGA-AC-A2QH-01A-11D-A18P-09	BRCA		17	7577097	7577097	C	A	NM_000546.6(TP53):c.841G>T (p.Asp281Tyr)	Pathogenic	germline/somatic
TP53	17	7578500	7578500	G	A	TCGA-AC-A3OD-01A-11D-A21Q-09	BRCA		17	7578500	7578500	G	A	NM_000546.6(TP53):c.430C>T (p.Gln144Ter)	Pathogenic	germline/somatic
TP53	17	7574002	7574002	C	G	TCGA-AC-A5XU-01A-11D-A28B-09	BRCA		17	7574002	7574002	C	G	NM_000546.6(TP53):c.1025G>C (p.Arg342Pro)	Pathogenic/Likely pathogenic	germline/somatic
TP53	17	7578265	7578265	A	G	TCGA-AC-A62X-01A-11D-A29N-09	BRCA		17	7578265	7578265	A	G	NM_000546.6(TP53):c.584T>C (p.Ile195Thr)	Pathogenic	germline/somatic
TP53	17	7578406	7578406	C	T	TCGA-AC-A6IW-01A-12D-A33E-09	BRCA		17	7578406	7578406	C	T	NM_000546.6(TP53):c.524G>A (p.Arg175His)	Pathogenic	germline/somatic
TP53	17	7577058	7577058	C	A	TCGA-AC-A8OQ-01A-11D-A41F-09	BRCA		17	7577058	7577058	C	A	NM_000546.6(TP53):c.880G>T (p.Glu294Ter)	Pathogenic	germline/somatic
TP53	17	7577094	7577094	G	A	TCGA-AD-6899-01A-11D-1924-10	COAD		17	7577094	7577094	G	A	NM_000546.6(TP53):c.844C>T (p.Arg282Trp)	Pathogenic/Likely pathogenic	germline/somatic
TP53	17	7578253	7578253	C	A	TCGA-AD-6901-01A-11D-1924-10	COAD		17	7578253	7578253	C	A	NM_000546.6(TP53):c.596G>T (p.Gly199Val)	Likely pathogenic	germline
TP53	17	7577586	7577586	A	C	TCGA-AD-6963-01A-11D-1924-10	COAD		17	7577586	7577586	A	C	NM_000546.6(TP53):c.695T>G (p.Ile232Ser)	Likely pathogenic	somatic
TP53	17	7578212	7578212	G	A	TCGA-AD-6965-01A-11D-1924-10	COAD		17	7578212	7578212	G	A	NM_000546.6(TP53):c.637C>T (p.Arg213Ter)	Pathogenic	germline/somatic
TP53	17	7578413	7578413	C	A	TCGA-AD-A5EK-01A-11D-A28G-10	COAD		17	7578413	7578413	C	A	NM_000546.6(TP53):c.517G>T (p.Val173Leu)	Pathogenic	germline/somatic
TP53	17	7577538	7577538	C	T	TCGA-AF-2687-01A-02D-1733-10	READ		17	7577538	7577538	C	T	NM_000546.6(TP53):c.743G>A (p.Arg248Gln)	Pathogenic	germline/somatic
TP53	17	7577538	7577538	C	T	TCGA-AF-2690-01A-02D-1733-10	READ		17	7577538	7577538	C	T	NM_000546.6(TP53):c.743G>A (p.Arg248Gln)	Pathogenic	germline/somatic
TP53	17	7579591	7579591	C	T	TCGA-AF-2693-01A-02D-1733-10	READ		17	7579591	7579591	C	T	NM_000546.6(TP53):c.97-1G>A	Likely pathogenic	germline/somatic
TP53	17	7577586	7577586	A	T	TCGA-AF-3911-01A-01D-1733-10	READ		17	7577586	7577586	A	T	NM_000546.6(TP53):c.695T>A (p.Ile232Asn)	Pathogenic	germline
TP53	17	7577547	7577547	C	T	TCGA-AF-6672-01A-11D-1826-10	READ		17	7577547	7577547	C	T	NM_000546.6(TP53):c.734G>A (p.Gly245Asp)	Pathogenic/Likely pathogenic	germline/somatic
TP53	17	7574003	7574003	G	A	TCGA-AF-A56K-01A-32D-A38X-10	READ		17	7574003	7574003	G	A	NM_000546.6(TP53):c.1024C>T (p.Arg342Ter)	Pathogenic	germline/somatic
TP53	17	7577538	7577538	C	T	TCGA-AF-A56L-01A-31D-A38X-10	READ		17	7577538	7577538	C	T	NM_000546.6(TP53):c.743G>A (p.Arg248Gln)	Pathogenic	germline/somatic
TP53	17	7578265	7578265	A	G	TCGA-AG-3591-01A-01D-1733-10	READ		17	7578265	7578265	A	G	NM_000546.6(TP53):c.584T>C (p.Ile195Thr)	Pathogenic	germline/somatic
TP53	17	7578406	7578406	C	T	TCGA-AG-3592-01A-02D-1733-10	READ		17	7578406	7578406	C	T	NM_000546.6(TP53):c.524G>A (p.Arg175His)	Pathogenic	germline/somatic
TP53	17	7578406	7578406	C	T	TCGA-AG-3725-01A-11D-1733-10	READ		17	7578406	7578406	C	T	NM_000546.6(TP53):c.524G>A (p.Arg175His)	Pathogenic	germline/somatic
TP53	17	7579591	7579591	C	T	TCGA-AG-3731-01A-11D-1733-10	READ		17	7579591	7579591	C	T	NM_000546.6(TP53):c.97-1G>A	Likely pathogenic	germline/somatic
TP53	17	7577120	7577120	C	T	TCGA-AG-3742-01A-11D-1657-10	READ		17	7577120	7577120	C	T	NM_000546.6(TP53):c.818G>A (p.Arg273His)	Pathogenic	germline/somatic
TP53	17	7578235	7578235	T	G	TCGA-AG-4021-01A-01D-1733-10	READ		17	7578235	7578235	T	G	NM_000546.6(TP53):c.614A>C (p.Tyr205Ser)	Likely pathogenic	somatic
TP53	17	7577120	7577120	C	T	TCGA-AG-4022-01A-01D-1733-10	READ		17	7577120	7577120	C	T	NM_000546.6(TP53):c.818G>A (p.Arg273His)	Pathogenic	germline/somatic
TP53	17	7577538	7577538	C	T	TCGA-AH-6549-01A-11D-1826-10	READ		17	7577538	7577538	C	T	NM_000546.6(TP53):c.743G>A (p.Arg248Gln)	Pathogenic	germline/somatic
TP53	17	7579361	7579361	A	C	TCGA-AH-6643-01A-11D-1826-10	READ		17	7579361	7579361	A	C	NM_000546.6(TP53):c.326T>G (p.Phe109Cys)	Likely pathogenic	somatic
TP53	17	7577094	7577094	G	A	TCGA-AH-6897-01A-11D-1924-10	READ		17	7577094	7577094	G	A	NM_000546.6(TP53):c.844C>T (p.Arg282Trp)	Pathogenic/Likely pathogenic	germline/somatic
TP53	17	7578406	7578406	C	T	TCGA-AJ-A23N-01A-11D-A228-09	UCEC		17	7578406	7578406	C	T	NM_000546.6(TP53):c.524G>A (p.Arg175His)	Pathogenic	germline/somatic
TP53	17	7577548	7577548	C	T	TCGA-AJ-A2QK-01A-11D-A18P-09	UCEC		17	7577548	7577548	C	T	NM_000546.6(TP53):c.733G>A (p.Gly245Ser)	Pathogenic	germline/somatic
TP53	17	7578265	7578265	A	G	TCGA-AJ-A3BD-01A-11D-A19Y-09	UCEC		17	7578265	7578265	A	G	NM_000546.6(TP53):c.584T>C (p.Ile195Thr)	Pathogenic	germline/somatic
TP53	17	7577120	7577120	C	T	TCGA-AJ-A3BF-01A-11D-A20S-09	UCEC		17	7577120	7577120	C	T	NM_000546.6(TP53):c.818G>A (p.Arg273His)	Pathogenic	germline/somatic
TP53	17	7577094	7577094	G	A	TCGA-AJ-A3BG-01A-11D-A19Y-09	UCEC		17	7577094	7577094	G	A	NM_000546.6(TP53):c.844C>T (p.Arg282Trp)	Pathogenic/Likely pathogenic	germline/somatic
TP53	17	7577538	7577538	C	T	TCGA-AJ-A3BG-01A-11D-A19Y-09	UCEC		17	7577538	7577538	C	T	NM_000546.6(TP53):c.743G>A (p.Arg248Gln)	Pathogenic	germline/somatic
TP53	17	7578212	7578212	G	A	TCGA-AJ-A3EK-01A-11D-A19Y-09	UCEC		17	7578212	7578212	G	A	NM_000546.6(TP53):c.637C>T (p.Arg213Ter)	Pathogenic	germline/somatic
TP53	17	7578406	7578406	C	T	TCGA-AJ-A3NF-01A-11D-A228-09	UCEC		17	7578406	7578406	C	T	NM_000546.6(TP53):c.524G>A (p.Arg175His)	Pathogenic	germline/somatic
TP53	17	7577120	7577120	C	T	TCGA-AJ-A3OJ-01A-11D-A228-09	UCEC		17	7577120	7577120	C	T	NM_000546.6(TP53):c.818G>A (p.Arg273His)	Pathogenic	germline/somatic
TP53	17	7577559	7577559	G	C	TCGA-AJ-A3TW-01A-11D-A228-09	UCEC		17	7577559	7577559	G	C	NM_000546.6(TP53):c.722C>G (p.Ser241Cys)	Likely pathogenic	germline/somatic
TP53	17	7579699	7579699	C	A	TCGA-AK-3440-01A-01D-0966-08	KIRC		17	7579699	7579699	C	A	NM_000546.6(TP53):c.96+1G>T	Pathogenic/Likely pathogenic	germline
TP53	17	7577121	7577121	G	A	TCGA-AM-5821-01A-01D-1650-10	COAD		17	7577121	7577121	G	A	NM_000546.6(TP53):c.817C>T (p.Arg273Cys)	Pathogenic/Likely pathogenic	germline/somatic
TP53	17	7578556	7578556	T	C	TCGA-AN-A0XN-01A-21D-A10G-09	BRCA		17	7578556	7578556	T	C	NM_000546.6(TP53):c.376-2A>G	Likely pathogenic	germline/somatic
TP53	17	7578555	7578555	C	T	TCGA-AN-A0XT-01A-11D-A10G-09	BRCA		17	7578555	7578555	C	T	NM_000546.6(TP53):c.376-1G>A	Pathogenic/Likely pathogenic	germline/somatic
TP53	17	7577547	7577547	C	T	TCGA-AO-A03V-01A-11D-A10Y-09	BRCA		17	7577547	7577547	C	T	NM_000546.6(TP53):c.734G>A (p.Gly245Asp)	Pathogenic/Likely pathogenic	germline/somatic
TP53	17	7578212	7578212	G	A	TCGA-AO-A124-01A-11D-A10M-09	BRCA		17	7578212	7578212	G	A	NM_000546.6(TP53):c.637C>T (p.Arg213Ter)	Pathogenic	germline/somatic
TP53	17	7574003	7574003	G	A	TCGA-AO-A128-01A-11D-A10M-09	BRCA		17	7574003	7574003	G	A	NM_000546.6(TP53):c.1024C>T (p.Arg342Ter)	Pathogenic	germline/somatic
TP53	17	7578406	7578406	C	T	TCGA-AO-A129-01A-21D-A10M-09	BRCA		17	7578406	7578406	C	T	NM_000546.6(TP53):c.524G>A (p.Arg175His)	Pathogenic	germline/somatic
TP53	17	7577121	7577121	G	A	TCGA-AP-A059-01A-21D-A122-09	UCEC		17	7577121	7577121	G	A	NM_000546.6(TP53):c.817C>T (p.Arg273Cys)	Pathogenic/Likely pathogenic	germline/somatic
TP53	17	7577121	7577121	G	T	TCGA-AP-A0LF-01A-11D-A122-09	UCEC		17	7577121	7577121	G	T	NM_000546.6(TP53):c.817C>A (p.Arg273Ser)	Pathogenic/Likely pathogenic	germline/somatic
TP53	17	7578388	7578388	C	T	TCGA-AP-A0LS-01A-11D-A14G-09	UCEC		17	7578388	7578388	C	T	NM_000546.6(TP53):c.542G>A (p.Arg181His)	Pathogenic/Likely pathogenic	germline/somatic
TP53	17	7578406	7578406	C	T	TCGA-AP-A1DQ-01A-11D-A135-09	UCEC		17	7578406	7578406	C	T	NM_000546.6(TP53):c.524G>A (p.Arg175His)	Pathogenic	germline/somatic
TP53	17	7577120	7577120	C	G	TCGA-AR-A0TP-01A-11D-A099-09	BRCA		17	7577120	7577120	C	G	NM_000546.6(TP53):c.818G>C (p.Arg273Pro)	Pathogenic	germline/somatic
TP53	17	7578257	7578257	C	A	TCGA-AR-A0TS-01A-11D-A10Y-09	BRCA		17	7578257	7578257	C	A	NM_000546.6(TP53):c.592G>T (p.Glu198Ter)	Pathogenic	somatic
TP53	17	7578235	7578235	T	C	TCGA-AR-A0TX-01A-11D-A099-09	BRCA		17	7578235	7578235	T	C	NM_000546.6(TP53):c.614A>G (p.Tyr205Cys)	Likely pathogenic	germline/somatic
TP53	17	7578190	7578190	T	C	TCGA-AR-A0U1-01A-11D-A10Y-09	BRCA		17	7578190	7578190	T	C	NM_000546.6(TP53):c.659A>G (p.Tyr220Cys)	Pathogenic	germline/somatic
TP53	17	7578403	7578403	C	A	TCGA-AR-A0U2-01A-11D-A10G-09	BRCA		17	7578403	7578403	C	A	NM_000546.6(TP53):c.527G>T (p.Cys176Phe)	Likely pathogenic	germline/somatic
TP53	17	7578272	7578272	G	A	TCGA-AR-A0U4-01A-11D-A117-09	BRCA		17	7578272	7578272	G	A	NM_000546.6(TP53):c.577C>T (p.His193Tyr)	Pathogenic/Likely pathogenic	germline/somatic
TP53	17	7577120	7577120	C	T	TCGA-AR-A1AJ-01A-21D-A12Q-09	BRCA		17	7577120	7577120	C	T	NM_000546.6(TP53):c.818G>A (p.Arg273His)	Pathogenic	germline/somatic
TP53	17	7578263	7578263	G	A	TCGA-AR-A1AP-01A-11D-A12Q-09	BRCA		17	7578263	7578263	G	A	NM_000546.6(TP53):c.586C>T (p.Arg196Ter)	Pathogenic	germline/somatic
TP53	17	7578406	7578406	C	T	TCGA-AR-A1AS-01A-11D-A12Q-09	BRCA		17	7578406	7578406	C	T	NM_000546.6(TP53):c.524G>A (p.Arg175His)	Pathogenic	germline/somatic
TP53	17	7577121	7577121	G	A	TCGA-AR-A1AW-01A-21D-A12Q-09	BRCA		17	7577121	7577121	G	A	NM_000546.6(TP53):c.817C>T (p.Arg273Cys)	Pathogenic/Likely pathogenic	germline/somatic
TP53	17	7577580	7577580	T	C	TCGA-AR-A24P-01A-11D-A167-09	BRCA		17	7577580	7577580	T	C	NM_000546.6(TP53):c.701A>G (p.Tyr234Cys)	Pathogenic/Likely pathogenic	germline/somatic
TP53	17	7578406	7578406	C	T	TCGA-AR-A24Q-01A-12D-A167-09	BRCA		17	7578406	7578406	C	T	NM_000546.6(TP53):c.524G>A (p.Arg175His)	Pathogenic	germline/somatic
TP53	17	7577096	7577096	T	A	TCGA-AR-A24S-01A-11D-A167-09	BRCA		17	7577096	7577096	T	A	NM_000546.6(TP53):c.842A>T (p.Asp281Val)	Pathogenic/Likely pathogenic	germline/somatic
TP53	17	7577120	7577120	C	T	TCGA-AR-A24T-01A-11D-A167-09	BRCA		17	7577120	7577120	C	T	NM_000546.6(TP53):c.818G>A (p.Arg273His)	Pathogenic	germline/somatic
TP53	17	7579536	7579536	C	A	TCGA-AR-A24U-01A-11D-A167-09	BRCA		17	7579536	7579536	C	A	NM_000546.6(TP53):c.151G>T (p.Glu51Ter)	Pathogenic	germline
TP53	17	7577085	7577085	C	T	TCGA-AR-A251-01A-12D-A167-09	BRCA		17	7577085	7577085	C	T	NM_000546.6(TP53):c.853G>A (p.Glu285Lys)	Pathogenic/Likely pathogenic	germline/somatic
TP53	17	7579315	7579315	G	T	TCGA-AR-A254-01A-21D-A167-09	BRCA		17	7579315	7579315	G	T	NM_000546.6(TP53):c.372C>A (p.Cys124Ter)	Pathogenic	germline
TP53	17	7577120	7577120	C	T	TCGA-AR-A2LH-01A-31D-A18P-09	BRCA		17	7577120	7577120	C	T	NM_000546.6(TP53):c.818G>A (p.Arg273His)	Pathogenic	germline/somatic
TP53	17	7578406	7578406	C	T	TCGA-AU-3779-01A-01D-1719-10	COAD		17	7578406	7578406	C	T	NM_000546.6(TP53):c.524G>A (p.Arg175His)	Pathogenic	germline/somatic
TP53	17	7577094	7577094	G	A	TCGA-AW-A1PO-01A-12D-A159-09	UCEC		17	7577094	7577094	G	A	NM_000546.6(TP53):c.844C>T (p.Arg282Trp)	Pathogenic/Likely pathogenic	germline/somatic
TP53	17	7577538	7577538	C	T	TCGA-AX-A1C9-01A-11D-A135-09	UCEC		17	7577538	7577538	C	T	NM_000546.6(TP53):c.743G>A (p.Arg248Gln)	Pathogenic	germline/somatic
TP53	17	7578403	7578403	C	T	TCGA-AX-A1CA-01A-12D-A135-09	UCEC		17	7578403	7578403	C	T	NM_000546.6(TP53):c.527G>A (p.Cys176Tyr)	Pathogenic	germline/somatic
TP53	17	7577094	7577094	G	A	TCGA-AX-A1CC-01A-11D-A135-09	UCEC		17	7577094	7577094	G	A	NM_000546.6(TP53):c.844C>T (p.Arg282Trp)	Pathogenic/Likely pathogenic	germline/somatic
TP53	17	7577102	7577102	C	T	TCGA-AX-A1CF-01A-11D-A135-09	UCEC		17	7577102	7577102	C	T	NM_000546.6(TP53):c.836G>A (p.Gly279Glu)	Pathogenic/Likely pathogenic	germline/somatic
TP53	17	7577120	7577120	C	T	TCGA-AX-A1CP-01A-11D-A135-09	UCEC		17	7577120	7577120	C	T	NM_000546.6(TP53):c.818G>A (p.Arg273His)	Pathogenic	germline/somatic
TP53	17	7578406	7578406	C	T	TCGA-AX-A2H4-01A-21D-A18P-09	UCEC		17	7578406	7578406	C	T	NM_000546.6(TP53):c.524G>A (p.Arg175His)	Pathogenic	germline/somatic
TP53	17	7577559	7577559	G	C	TCGA-AX-A2H8-01A-11D-A17D-09	UCEC		17	7577559	7577559	G	C	NM_000546.6(TP53):c.722C>G (p.Ser241Cys)	Likely pathogenic	germline/somatic
TP53	17	7577121	7577121	G	A	TCGA-AX-A2HF-01A-11D-A17D-09	UCEC		17	7577121	7577121	G	A	NM_000546.6(TP53):c.817C>T (p.Arg273Cys)	Pathogenic/Likely pathogenic	germline/somatic
TP53	17	7578235	7578235	T	C	TCGA-AX-A2IN-01A-12D-A17W-09	UCEC		17	7578235	7578235	T	C	NM_000546.6(TP53):c.614A>G (p.Tyr205Cys)	Likely pathogenic	germline/somatic
TP53	17	7578556	7578556	T	C	TCGA-AX-A3FV-01A-11D-A228-09	UCEC		17	7578556	7578556	T	C	NM_000546.6(TP53):c.376-2A>G	Likely pathogenic	germline/somatic
TP53	17	7578508	7578508	C	T	TCGA-AX-A3FW-01A-11D-A228-09	UCEC		17	7578508	7578508	C	T	NM_000546.6(TP53):c.422G>A (p.Cys141Tyr)	Pathogenic	germline/somatic
TP53	17	7577567	7577567	A	C	TCGA-AX-A3FZ-01A-11D-A228-09	UCEC		17	7577567	7577567	A	C	NM_000546.6(TP53):c.714T>G (p.Cys238Trp)	Pathogenic	germline/somatic
TP53	17	7577547	7577547	C	G	TCGA-AX-A3G3-01A-11D-A20S-09	UCEC		17	7577547	7577547	C	G	NM_000546.6(TP53):c.734G>C (p.Gly245Ala)	Likely pathogenic	germline/somatic
TP53	17	7578403	7578403	C	T	TCGA-AX-A3G4-01A-11D-A20S-09	UCEC		17	7578403	7578403	C	T	NM_000546.6(TP53):c.527G>A (p.Cys176Tyr)	Pathogenic	germline/somatic
TP53	17	7577539	7577539	G	A	TCGA-AX-A3G7-01A-12D-A20S-09	UCEC		17	7577539	7577539	G	A	NM_000546.6(TP53):c.742C>T (p.Arg248Trp)	Pathogenic	germline/somatic
TP53	17	7578212	7578212	G	A	TCGA-AY-5543-01A-01D-1650-10	COAD		17	7578212	7578212	G	A	NM_000546.6(TP53):c.637C>T (p.Arg213Ter)	Pathogenic	germline/somatic
TP53	17	7577120	7577120	C	T	TCGA-AY-6196-01A-11D-1719-10	COAD		17	7577120	7577120	C	T	NM_000546.6(TP53):c.818G>A (p.Arg273His)	Pathogenic	germline/somatic
TP53	17	7578406	7578406	C	T	TCGA-AY-6197-01A-11D-1719-10	COAD		17	7578406	7578406	C	T	NM_000546.6(TP53):c.524G>A (p.Arg175His)	Pathogenic	germline/somatic
TP53	17	7578212	7578212	G	A	TCGA-AY-A8YK-01A-11D-A40P-10	COAD		17	7578212	7578212	G	A	NM_000546.6(TP53):c.637C>T (p.Arg213Ter)	Pathogenic	germline/somatic
TP53	17	7577570	7577570	C	T	TCGA-AZ-4308-01A-01D-1408-10	COAD		17	7577570	7577570	C	T	NM_000546.6(TP53):c.711G>A (p.Met237Ile)	Pathogenic	germline/somatic
TP53	17	7578403	7578403	C	T	TCGA-AZ-4614-01A-01D-1408-10	COAD		17	7578403	7578403	C	T	NM_000546.6(TP53):c.527G>A (p.Cys176Tyr)	Pathogenic	germline/somatic
TP53	17	7578406	7578406	C	T	TCGA-AZ-4681-01A-01D-1408-10	COAD		17	7578406	7578406	C	T	NM_000546.6(TP53):c.524G>A (p.Arg175His)	Pathogenic	germline/somatic
TP53	17	7578370	7578370	C	T	TCGA-AZ-5403-01A-01D-1650-10	COAD		17	7578370	7578370	C	T	NM_000546.6(TP53):c.559+1G>A	Pathogenic/Likely pathogenic	germline
TP53	17	7578406	7578406	C	T	TCGA-AZ-5407-01A-01D-1719-10	COAD		17	7578406	7578406	C	T	NM_000546.6(TP53):c.524G>A (p.Arg175His)	Pathogenic	germline/somatic
TP53	17	7578406	7578406	C	T	TCGA-AZ-6601-01A-11D-1771-10	COAD		17	7578406	7578406	C	T	NM_000546.6(TP53):c.524G>A (p.Arg175His)	Pathogenic	germline/somatic
TP53	17	7578406	7578406	C	T	TCGA-AZ-6606-01A-11D-1835-10	COAD		17	7578406	7578406	C	T	NM_000546.6(TP53):c.524G>A (p.Arg175His)	Pathogenic	germline/somatic
TP53	17	7577124	7577124	C	T	TCGA-AZ-6607-01A-11D-1835-10	COAD		17	7577124	7577124	C	T	NM_000546.6(TP53):c.814G>A (p.Val272Met)	Pathogenic	germline/somatic
TP53	17	7577538	7577538	C	A	TCGA-B0-4698-01A-01D-1501-10	KIRC		17	7577538	7577538	C	A	NM_000546.6(TP53):c.743G>T (p.Arg248Leu)	Pathogenic	germline/somatic
TP53	17	7578211	7578211	C	T	TCGA-B0-4710-01A-01D-1501-10	KIRC		17	7578211	7578211	C	T	NM_000546.6(TP53):c.638G>A (p.Arg213Gln)	Pathogenic	germline/somatic
TP53	17	7577580	7577580	T	C	TCGA-B0-4810-01A-01D-1501-10	KIRC		17	7577580	7577580	T	C	NM_000546.6(TP53):c.701A>G (p.Tyr234Cys)	Pathogenic/Likely pathogenic	germline/somatic
TP53	17	7578212	7578212	G	A	TCGA-B0-5098-01A-01D-1421-08	KIRC		17	7578212	7578212	G	A	NM_000546.6(TP53):c.637C>T (p.Arg213Ter)	Pathogenic	germline/somatic
TP53	17	7578272	7578272	G	A	TCGA-B0-5117-01A-01D-1421-08	KIRC		17	7578272	7578272	G	A	NM_000546.6(TP53):c.577C>T (p.His193Tyr)	Pathogenic/Likely pathogenic	germline/somatic
TP53	17	7578271	7578271	T	G	TCGA-B1-A655-01A-11D-A31Z-10	KIRP		17	7578271	7578271	T	G	NM_000546.6(TP53):c.578A>C (p.His193Pro)	Pathogenic	germline/somatic
TP53	17	7579415	7579415	C	T	TCGA-B3-4104-01A-01D-1458-08	KIRP		17	7579415	7579415	C	T	NM_000546.6(TP53):c.272G>A (p.Trp91Ter)	Likely pathogenic	germline
TP53	17	7577139	7577139	G	A	TCGA-B5-A0JU-01B-11D-A14G-09	UCEC		17	7577139	7577139	G	A	NM_000546.6(TP53):c.799C>T (p.Arg267Trp)	Pathogenic/Likely pathogenic	germline/somatic
TP53	17	7578479	7578479	G	A	TCGA-B5-A0K8-01A-11D-A14K-09	UCEC		17	7578479	7578479	G	A	NM_000546.6(TP53):c.451C>T (p.Pro151Ser)	Pathogenic/Likely pathogenic	germline/somatic
TP53	17	7577120	7577120	C	T	TCGA-B5-A0KB-01B-11D-A14G-09	UCEC		17	7577120	7577120	C	T	NM_000546.6(TP53):c.818G>A (p.Arg273His)	Pathogenic	germline/somatic
TP53	17	7574003	7574003	G	A	TCGA-B5-A11E-01A-11D-A10M-09	UCEC		17	7574003	7574003	G	A	NM_000546.6(TP53):c.1024C>T (p.Arg342Ter)	Pathogenic	germline/somatic
TP53	17	7577022	7577022	G	A	TCGA-B5-A11I-01A-11D-A10M-09	UCEC		17	7577022	7577022	G	A	NM_000546.6(TP53):c.916C>T (p.Arg306Ter)	Pathogenic	germline/somatic
TP53	17	7577551	7577551	C	T	TCGA-B5-A11J-01A-11D-A122-09	UCEC		17	7577551	7577551	C	T	NM_000546.6(TP53):c.730G>A (p.Gly244Ser)	Pathogenic	germline/somatic
TP53	17	7578189	7578189	A	T	TCGA-B5-A1MS-01B-11D-A228-09	UCEC		17	7578189	7578189	A	T	NM_000546.6(TP53):c.660T>A (p.Tyr220Ter)	Pathogenic	somatic
TP53	17	7578271	7578271	T	G	TCGA-B5-A1MU-01A-11D-A13L-09	UCEC		17	7578271	7578271	T	G	NM_000546.6(TP53):c.578A>C (p.His193Pro)	Pathogenic	germline/somatic
TP53	17	7576897	7576897	G	A	TCGA-B5-A1N2-01A-21D-A142-09	UCEC		17	7576897	7576897	G	A	NM_000546.6(TP53):c.949C>T (p.Gln317Ter)	Pathogenic/Likely pathogenic	germline
TP53	17	7578492	7578492	C	T	TCGA-B5-A3FC-01A-11D-A228-09	UCEC		17	7578492	7578492	C	T	NM_000546.6(TP53):c.438G>A (p.Trp146Ter)	Pathogenic	germline/somatic
TP53	17	7578406	7578406	C	T	TCGA-B5-A5OD-01A-11D-A31U-09	UCEC		17	7578406	7578406	C	T	NM_000546.6(TP53):c.524G>A (p.Arg175His)	Pathogenic	germline/somatic
TP53	17	7577120	7577120	C	T	TCGA-B5-A5OE-01A-11D-A31U-09	UCEC		17	7577120	7577120	C	T	NM_000546.6(TP53):c.818G>A (p.Arg273His)	Pathogenic	germline/somatic
TP53	17	7577538	7577538	C	T	TCGA-B6-A0I1-01A-11D-A21Q-09	BRCA		17	7577538	7577538	C	T	NM_000546.6(TP53):c.743G>A (p.Arg248Gln)	Pathogenic	germline/somatic
TP53	17	7578190	7578190	T	G	TCGA-B6-A0RH-01A-21D-A10Y-09	BRCA		17	7578190	7578190	T	G	NM_000546.6(TP53):c.659A>C (p.Tyr220Ser)	Pathogenic	germline/somatic
TP53	17	7578263	7578263	G	A	TCGA-B6-A0RU-01A-11D-A099-09	BRCA		17	7578263	7578263	G	A	NM_000546.6(TP53):c.586C>T (p.Arg196Ter)	Pathogenic	germline/somatic
TP53	17	7577539	7577539	G	A	TCGA-B6-A0WX-01A-11D-A10G-09	BRCA		17	7577539	7577539	G	A	NM_000546.6(TP53):c.742C>T (p.Arg248Trp)	Pathogenic	germline/somatic
TP53	17	7579346	7579346	A	T	TCGA-B6-A0WX-01A-11D-A10G-09	BRCA		17	7579346	7579346	A	T	NM_000546.6(TP53):c.341T>A (p.Leu114Ter)	Pathogenic	somatic
TP53	17	7576852	7576852	C	A	TCGA-B6-A0X1-01A-11D-A10G-09	BRCA		17	7576852	7576852	C	A	NM_000546.6(TP53):c.993+1G>T	Pathogenic	germline/somatic
TP53	17	7577144	7577144	A	G	TCGA-B6-A1KN-01A-11D-A13L-09	BRCA		17	7577144	7577144	A	G	NM_000546.6(TP53):c.794T>C (p.Leu265Pro)	Pathogenic/Likely pathogenic	germline
TP53	17	7578406	7578406	C	T	TCGA-B6-A401-01A-11D-A23C-09	BRCA		17	7578406	7578406	C	T	NM_000546.6(TP53):c.524G>A (p.Arg175His)	Pathogenic	germline/somatic
TP53	17	7578176	7578176	C	T	TCGA-B7-5818-01A-11D-1600-08	STAD		17	7578176	7578176	C	T	NM_000546.6(TP53):c.672+1G>A	Pathogenic	germline
TP53	17	7578475	7578475	G	A	TCGA-B7-A5TI-01A-11D-A31L-08	STAD		17	7578475	7578475	G	A	NM_000546.6(TP53):c.455C>T (p.Pro152Leu)	Pathogenic	germline/somatic
TP53	17	7577017	7577017	A	C	TCGA-BA-4075-01A-01D-1434-08	HNSC		17	7577017	7577017	A	C	NM_000546.6(TP53):c.919+2T>G	Pathogenic/Likely pathogenic	germline/somatic
TP53	17	7577610	7577610	T	C	TCGA-BA-4078-01A-01D-1434-08	HNSC		17	7577610	7577610	T	C	NM_000546.6(TP53):c.673-2A>G	Pathogenic	germline/somatic
TP53	17	7577548	7577548	C	T	TCGA-BA-5152-01A-02D-1870-08	HNSC		17	7577548	7577548	C	T	NM_000546.6(TP53):c.733G>A (p.Gly245Ser)	Pathogenic	germline/somatic
TP53	17	7577094	7577094	G	A	TCGA-BA-5558-01A-01D-1512-08	HNSC		17	7577094	7577094	G	A	NM_000546.6(TP53):c.844C>T (p.Arg282Trp)	Pathogenic/Likely pathogenic	germline/somatic
TP53	17	7578406	7578406	C	T	TCGA-BA-5558-01A-01D-1512-08	HNSC		17	7578406	7578406	C	T	NM_000546.6(TP53):c.524G>A (p.Arg175His)	Pathogenic	germline/somatic
TP53	17	7577568	7577568	C	A	TCGA-BA-6869-01A-11D-1870-08	HNSC		17	7577568	7577568	C	A	NM_000546.6(TP53):c.713G>T (p.Cys238Phe)	Pathogenic	germline/somatic
TP53	17	7577556	7577556	C	T	TCGA-BA-6870-01A-11D-1870-08	HNSC		17	7577556	7577556	C	T	NM_000546.6(TP53):c.725G>A (p.Cys242Tyr)	Pathogenic	germline/somatic
TP53	17	7578406	7578406	C	T	TCGA-BA-6872-01A-11D-1870-08	HNSC		17	7578406	7578406	C	T	NM_000546.6(TP53):c.524G>A (p.Arg175His)	Pathogenic	germline/somatic
TP53	17	7577111	7577111	G	T	TCGA-BA-A4II-01A-11D-A25Y-08	HNSC		17	7577111	7577111	G	T	NM_000546.6(TP53):c.827C>A (p.Ala276Asp)	Likely pathogenic	germline
TP53	17	7577124	7577124	C	T	TCGA-BA-A6DA-01A-31D-A31L-08	HNSC		17	7577124	7577124	C	T	NM_000546.6(TP53):c.814G>A (p.Val272Met)	Pathogenic	germline/somatic
TP53	17	7577121	7577121	G	A	TCGA-BA-A6DB-01A-11D-A30E-08	HNSC		17	7577121	7577121	G	A	NM_000546.6(TP53):c.817C>T (p.Arg273Cys)	Pathogenic/Likely pathogenic	germline/somatic
TP53	17	7577120	7577120	C	T	TCGA-BA-A6DD-01A-12D-A31L-08	HNSC		17	7577120	7577120	C	T	NM_000546.6(TP53):c.818G>A (p.Arg273His)	Pathogenic	germline/somatic
TP53	17	7578413	7578413	C	T	TCGA-BA-A6DE-01A-22D-A31L-08	HNSC		17	7578413	7578413	C	T	NM_000546.6(TP53):c.517G>A (p.Val173Met)	Pathogenic	germline/somatic
TP53	17	7578263	7578263	G	A	TCGA-BA-A6DG-01A-21D-A30E-08	HNSC		17	7578263	7578263	G	A	NM_000546.6(TP53):c.586C>T (p.Arg196Ter)	Pathogenic	germline/somatic
TP53	17	7578403	7578403	C	T	TCGA-BA-A6DI-01A-11D-A30E-08	HNSC		17	7578403	7578403	C	T	NM_000546.6(TP53):c.527G>A (p.Cys176Tyr)	Pathogenic	germline/somatic
TP53	17	7577550	7577550	C	A	TCGA-BA-A6DL-01A-21D-A30E-08	HNSC		17	7577550	7577550	C	A	NM_000546.6(TP53):c.731G>T (p.Gly244Val)	Likely pathogenic	somatic
TP53	17	7579373	7579373	C	A	TCGA-BA-A6DL-01A-21D-A30E-08	HNSC		17	7579373	7579373	C	A	NM_000546.6(TP53):c.314G>T (p.Gly105Val)	Likely pathogenic	somatic
TP53	17	7578431	7578431	G	A	TCGA-BA-A8YP-01A-11D-A391-08	HNSC		17	7578431	7578431	G	A	NM_000546.6(TP53):c.499C>T (p.Gln167Ter)	Pathogenic/Likely pathogenic	germline
TP53	17	7578500	7578500	G	A	TCGA-BB-4224-01A-01D-1434-08	HNSC		17	7578500	7578500	G	A	NM_000546.6(TP53):c.430C>T (p.Gln144Ter)	Pathogenic	germline/somatic
TP53	17	7578212	7578212	G	A	TCGA-BB-4227-01A-01D-1870-08	HNSC		17	7578212	7578212	G	A	NM_000546.6(TP53):c.637C>T (p.Arg213Ter)	Pathogenic	germline/somatic
TP53	17	7578403	7578403	C	T	TCGA-BB-A5HU-01A-11D-A28R-08	HNSC		17	7578403	7578403	C	T	NM_000546.6(TP53):c.527G>A (p.Cys176Tyr)	Pathogenic	germline/somatic
TP53	17	7577539	7577539	G	A	TCGA-BB-A5HZ-01A-21D-A28R-08	HNSC		17	7577539	7577539	G	A	NM_000546.6(TP53):c.742C>T (p.Arg248Trp)	Pathogenic	germline/somatic
TP53	17	7578392	7578392	C	T	TCGA-BB-A5HZ-01A-21D-A28R-08	HNSC		17	7578392	7578392	C	T	NM_000546.6(TP53):c.538G>A (p.Glu180Lys)	Likely pathogenic	germline
TP53	17	7577017	7577017	A	C	TCGA-BB-A6UO-01A-12D-A34J-08	HNSC		17	7577017	7577017	A	C	NM_000546.6(TP53):c.919+2T>G	Pathogenic/Likely pathogenic	germline/somatic
TP53	17	7578211	7578211	C	T	TCGA-BC-A10U-01A-11D-A12Z-10	LIHC		17	7578211	7578211	C	T	NM_000546.6(TP53):c.638G>A (p.Arg213Gln)	Pathogenic	germline/somatic
TP53	17	7577539	7577539	G	A	TCGA-BC-A216-01A-11D-A152-10	LIHC		17	7577539	7577539	G	A	NM_000546.6(TP53):c.742C>T (p.Arg248Trp)	Pathogenic	germline/somatic
TP53	17	7577120	7577120	C	T	TCGA-BC-A217-01A-11D-A152-10	LIHC		17	7577120	7577120	C	T	NM_000546.6(TP53):c.818G>A (p.Arg273His)	Pathogenic	germline/somatic
TP53	17	7577111	7577111	G	C	TCGA-BC-A5W4-01A-11D-A28X-10	LIHC		17	7577111	7577111	G	C	NM_000546.6(TP53):c.827C>G (p.Ala276Gly)	Pathogenic	germline
TP53	17	7577082	7577082	C	T	TCGA-BF-A1Q0-01A-21D-A19A-08	SKCM		17	7577082	7577082	C	T	NM_000546.6(TP53):c.856G>A (p.Glu286Lys)	Pathogenic	germline/somatic
TP53	17	7578263	7578263	G	A	TCGA-BF-A3DL-01A-11D-A20D-08	SKCM		17	7578263	7578263	G	A	NM_000546.6(TP53):c.586C>T (p.Arg196Ter)	Pathogenic	germline/somatic
TP53	17	7578395	7578395	G	A	TCGA-BF-AAP2-01A-11D-A401-08	SKCM		17	7578395	7578395	G	A	NM_000546.6(TP53):c.535C>T (p.His179Tyr)	Pathogenic/Likely pathogenic	germline/somatic
TP53	17	7578190	7578190	T	C	TCGA-BG-A0M8-01A-12D-A10B-09	UCEC		17	7578190	7578190	T	C	NM_000546.6(TP53):c.659A>G (p.Tyr220Cys)	Pathogenic	germline/somatic
TP53	17	7577538	7577538	C	T	TCGA-BG-A0YV-01A-11D-A10M-09	UCEC		17	7577538	7577538	C	T	NM_000546.6(TP53):c.743G>A (p.Arg248Gln)	Pathogenic	germline/somatic
TP53	17	7578190	7578190	T	C	TCGA-BG-A18C-01A-11D-A12J-09	UCEC		17	7578190	7578190	T	C	NM_000546.6(TP53):c.659A>G (p.Tyr220Cys)	Pathogenic	germline/somatic
TP53	17	7577570	7577570	C	T	TCGA-BG-A3PP-01A-11D-A228-09	UCEC		17	7577570	7577570	C	T	NM_000546.6(TP53):c.711G>A (p.Met237Ile)	Pathogenic	germline/somatic
TP53	17	7577538	7577538	C	T	TCGA-BH-A0AV-01A-31D-A10Y-09	BRCA		17	7577538	7577538	C	T	NM_000546.6(TP53):c.743G>A (p.Arg248Gln)	Pathogenic	germline/somatic
TP53	17	7578406	7578406	C	T	TCGA-BH-A0B0-01A-21D-A10Y-09	BRCA		17	7578406	7578406	C	T	NM_000546.6(TP53):c.524G>A (p.Arg175His)	Pathogenic	germline/somatic
TP53	17	7578290	7578290	C	T	TCGA-BH-A0B7-01A-12D-A10Y-09	BRCA		17	7578290	7578290	C	T	NM_000546.6(TP53):c.560-1G>A	Pathogenic	germline/somatic
TP53	17	7577539	7577539	G	A	TCGA-BH-A0BC-01A-22D-A099-09	BRCA		17	7577539	7577539	G	A	NM_000546.6(TP53):c.742C>T (p.Arg248Trp)	Pathogenic	germline/somatic
TP53	17	7577548	7577548	C	T	TCGA-BH-A0BF-01A-21D-A12Q-09	BRCA		17	7577548	7577548	C	T	NM_000546.6(TP53):c.733G>A (p.Gly245Ser)	Pathogenic	germline/somatic
TP53	17	7578534	7578534	C	G	TCGA-BH-A0BP-01A-11D-A10Y-09	BRCA		17	7578534	7578534	C	G	NM_000546.6(TP53):c.396G>C (p.Lys132Asn)	Likely pathogenic	germline/somatic
TP53	17	7578458	7578458	G	C	TCGA-BH-A0BT-01A-11D-A12Q-09	BRCA		17	7578458	7578458	G	C	NM_000546.6(TP53):c.472C>G (p.Arg158Gly)	Pathogenic	germline
TP53	17	7577081	7577081	T	G	TCGA-BH-A0DL-01A-11D-A10Y-09	BRCA		17	7577081	7577081	T	G	NM_000546.6(TP53):c.857A>C (p.Glu286Ala)	Likely pathogenic	somatic
TP53	17	7574003	7574003	G	A	TCGA-BH-A0RX-01A-21D-A099-09	BRCA		17	7574003	7574003	G	A	NM_000546.6(TP53):c.1024C>T (p.Arg342Ter)	Pathogenic	germline/somatic
TP53	17	7577559	7577559	G	C	TCGA-BH-A0WA-01A-11D-A10G-09	BRCA		17	7577559	7577559	G	C	NM_000546.6(TP53):c.722C>G (p.Ser241Cys)	Likely pathogenic	germline/somatic
TP53	17	7576855	7576855	G	A	TCGA-BH-A18H-01A-11D-A12B-09	BRCA		17	7576855	7576855	G	A	NM_000546.6(TP53):c.991C>T (p.Gln331Ter)	Pathogenic	germline
TP53	17	7577085	7577085	C	T	TCGA-BH-A1F2-01A-31D-A13L-09	BRCA		17	7577085	7577085	C	T	NM_000546.6(TP53):c.853G>A (p.Glu285Lys)	Pathogenic/Likely pathogenic	germline/somatic
TP53	17	7577610	7577610	T	C	TCGA-BH-A1FC-01A-11D-A13L-09	BRCA		17	7577610	7577610	T	C	NM_000546.6(TP53):c.673-2A>G	Pathogenic	germline/somatic
TP53	17	7578406	7578406	C	T	TCGA-BH-A1FU-01A-11D-A14G-09	BRCA		17	7578406	7578406	C	T	NM_000546.6(TP53):c.524G>A (p.Arg175His)	Pathogenic	germline/somatic
TP53	17	7578212	7578212	G	A	TCGA-BH-A202-01A-11D-A14K-09	BRCA		17	7578212	7578212	G	A	NM_000546.6(TP53):c.637C>T (p.Arg213Ter)	Pathogenic	germline/somatic
TP53	17	7577120	7577120	C	T	TCGA-BH-A203-01A-12D-A167-09	BRCA		17	7577120	7577120	C	T	NM_000546.6(TP53):c.818G>A (p.Arg273His)	Pathogenic	germline/somatic
TP53	17	7578290	7578290	C	G	TCGA-BH-A208-01A-11D-A159-09	BRCA		17	7578290	7578290	C	G	NM_000546.6(TP53):c.560-1G>C	Pathogenic/Likely pathogenic	germline/somatic
TP53	17	7577120	7577120	C	T	TCGA-BH-A5IZ-01A-11D-A27P-09	BRCA		17	7577120	7577120	C	T	NM_000546.6(TP53):c.818G>A (p.Arg273His)	Pathogenic	germline/somatic
TP53	17	7577085	7577085	C	T	TCGA-BH-A5J0-01A-11D-A27P-09	BRCA		17	7577085	7577085	C	T	NM_000546.6(TP53):c.853G>A (p.Glu285Lys)	Pathogenic/Likely pathogenic	germline/somatic
TP53	17	7576855	7576855	G	A	TCGA-BK-A0CC-01A-21D-A272-09	UCEC		17	7576855	7576855	G	A	NM_000546.6(TP53):c.991C>T (p.Gln331Ter)	Pathogenic	germline
TP53	17	7577094	7577094	G	A	TCGA-BK-A139-01A-11D-A272-09	UCEC		17	7577094	7577094	G	A	NM_000546.6(TP53):c.844C>T (p.Arg282Trp)	Pathogenic/Likely pathogenic	germline/somatic
TP53	17	7578433	7578433	G	C	TCGA-BK-A26L-01A-11D-A272-09	UCEC		17	7578433	7578433	G	C	NM_000546.6(TP53):c.497C>G (p.Ser166Ter)	Pathogenic	somatic
TP53	17	7577538	7577538	C	T	TCGA-BK-A4ZD-01A-11D-A27P-09	UCEC		17	7577538	7577538	C	T	NM_000546.6(TP53):c.743G>A (p.Arg248Gln)	Pathogenic	germline/somatic
TP53	17	7578190	7578190	T	C	TCGA-BL-A13J-01A-11D-A271-08	BLCA		17	7578190	7578190	T	C	NM_000546.6(TP53):c.659A>G (p.Tyr220Cys)	Pathogenic	germline/somatic
TP53	17	7577538	7577538	C	G	TCGA-BL-A3JM-01A-12D-A21A-08	BLCA		17	7577538	7577538	C	G	NM_000546.6(TP53):c.743G>C (p.Arg248Pro)	Pathogenic	germline/somatic
TP53	17	7578419	7578419	C	A	TCGA-BM-6198-01A-11D-1733-10	READ		17	7578419	7578419	C	A	NM_000546.6(TP53):c.511G>T (p.Glu171Ter)	Pathogenic	germline/somatic
TP53	17	7577498	7577498	C	A	TCGA-BP-4770-01A-01D-1501-10	KIRC		17	7577498	7577498	C	A	NM_000546.6(TP53):c.782+1G>T	Likely pathogenic	germline/somatic
TP53	17	7578190	7578190	T	G	TCGA-BQ-5881-01A-11D-1589-08	KIRP		17	7578190	7578190	T	G	NM_000546.6(TP53):c.659A>C (p.Tyr220Ser)	Pathogenic	germline/somatic
TP53	17	7578370	7578370	C	T	TCGA-BR-4183-01A-02D-1126-08	STAD		17	7578370	7578370	C	T	NM_000546.6(TP53):c.559+1G>A	Pathogenic/Likely pathogenic	germline
TP53	17	7578208	7578208	T	C	TCGA-BR-4255-01A-01D-1126-08	STAD		17	7578208	7578208	T	C	NM_000546.6(TP53):c.641A>G (p.His214Arg)	Likely pathogenic	germline/somatic
TP53	17	7577121	7577121	G	A	TCGA-BR-4256-01A-01D-1126-08	STAD		17	7577121	7577121	G	A	NM_000546.6(TP53):c.817C>T (p.Arg273Cys)	Pathogenic/Likely pathogenic	germline/somatic
TP53	17	7577121	7577121	G	A	TCGA-BR-4292-01A-01D-1126-08	STAD		17	7577121	7577121	G	A	NM_000546.6(TP53):c.817C>T (p.Arg273Cys)	Pathogenic/Likely pathogenic	germline/somatic
TP53	17	7577538	7577538	C	T	TCGA-BR-4357-01A-01D-1158-08	STAD		17	7577538	7577538	C	T	NM_000546.6(TP53):c.743G>A (p.Arg248Gln)	Pathogenic	germline/somatic
TP53	17	7577120	7577120	C	T	TCGA-BR-4361-01A-01D-1158-08	STAD		17	7577120	7577120	C	T	NM_000546.6(TP53):c.818G>A (p.Arg273His)	Pathogenic	germline/somatic
TP53	17	7578263	7578263	G	A	TCGA-BR-4363-01A-01D-1158-08	STAD		17	7578263	7578263	G	A	NM_000546.6(TP53):c.586C>T (p.Arg196Ter)	Pathogenic	germline/somatic
TP53	17	7578431	7578431	G	A	TCGA-BR-4366-01A-01D-1158-08	STAD		17	7578431	7578431	G	A	NM_000546.6(TP53):c.499C>T (p.Gln167Ter)	Pathogenic/Likely pathogenic	germline
TP53	17	7578271	7578271	T	C	TCGA-BR-6456-01A-11D-1800-08	STAD		17	7578271	7578271	T	C	NM_000546.6(TP53):c.578A>G (p.His193Arg)	Pathogenic/Likely pathogenic	germline/somatic
TP53	17	7577022	7577022	G	A	TCGA-BR-6457-01A-21D-1800-08	STAD		17	7577022	7577022	G	A	NM_000546.6(TP53):c.916C>T (p.Arg306Ter)	Pathogenic	germline/somatic
TP53	17	7577120	7577120	C	T	TCGA-BR-6458-01A-11D-1800-08	STAD		17	7577120	7577120	C	T	NM_000546.6(TP53):c.818G>A (p.Arg273His)	Pathogenic	germline/somatic
TP53	17	7578212	7578212	G	A	TCGA-BR-7197-01A-11D-2201-08	STAD		17	7578212	7578212	G	A	NM_000546.6(TP53):c.637C>T (p.Arg213Ter)	Pathogenic	germline/somatic
TP53	17	7577129	7577129	A	G	TCGA-BR-7715-01A-11D-2053-08	STAD		17	7577129	7577129	A	G	NM_000546.6(TP53):c.809T>C (p.Phe270Ser)	Pathogenic/Likely pathogenic	germline/somatic
TP53	17	7577120	7577120	C	T	TCGA-BR-7716-01A-21D-2053-08	STAD		17	7577120	7577120	C	T	NM_000546.6(TP53):c.818G>A (p.Arg273His)	Pathogenic	germline/somatic
TP53	17	7577156	7577156	C	T	TCGA-BR-7723-01A-11D-2053-08	STAD		17	7577156	7577156	C	T	NM_000546.6(TP53):c.783-1G>A	Pathogenic	germline/somatic
TP53	17	7577120	7577120	C	T	TCGA-BR-7901-01A-11D-2201-08	STAD		17	7577120	7577120	C	T	NM_000546.6(TP53):c.818G>A (p.Arg273His)	Pathogenic	germline/somatic
TP53	17	7577094	7577094	G	A	TCGA-BR-8077-01A-11D-2340-08	STAD		17	7577094	7577094	G	A	NM_000546.6(TP53):c.844C>T (p.Arg282Trp)	Pathogenic/Likely pathogenic	germline/somatic
TP53	17	7577548	7577548	C	T	TCGA-BR-8286-01A-12D-2340-08	STAD		17	7577548	7577548	C	T	NM_000546.6(TP53):c.733G>A (p.Gly245Ser)	Pathogenic	germline/somatic
TP53	17	7577120	7577120	C	T	TCGA-BR-8289-01A-11D-2340-08	STAD		17	7577120	7577120	C	T	NM_000546.6(TP53):c.818G>A (p.Arg273His)	Pathogenic	germline/somatic
TP53	17	7577568	7577568	C	A	TCGA-BR-8296-01A-11D-2340-08	STAD		17	7577568	7577568	C	A	NM_000546.6(TP53):c.713G>T (p.Cys238Phe)	Pathogenic	germline/somatic
TP53	17	7578406	7578406	C	T	TCGA-BR-8297-01A-12D-2340-08	STAD		17	7578406	7578406	C	T	NM_000546.6(TP53):c.524G>A (p.Arg175His)	Pathogenic	germline/somatic
TP53	17	7574003	7574003	G	A	TCGA-BR-8360-01A-11D-2340-08	STAD		17	7574003	7574003	G	A	NM_000546.6(TP53):c.1024C>T (p.Arg342Ter)	Pathogenic	germline/somatic
TP53	17	7574018	7574018	G	A	TCGA-BR-8360-01A-11D-2340-08	STAD		17	7574018	7574018	G	A	NM_000546.6(TP53):c.1009C>T (p.Arg337Cys)	Pathogenic/Likely pathogenic	germline/somatic
TP53	17	7578403	7578403	C	T	TCGA-BR-8361-01A-11D-2340-08	STAD		17	7578403	7578403	C	T	NM_000546.6(TP53):c.527G>A (p.Cys176Tyr)	Pathogenic	germline/somatic
TP53	17	7579311	7579311	C	T	TCGA-BR-8369-01A-11D-2340-08	STAD		17	7579311	7579311	C	T	NM_000546.6(TP53):c.375+1G>A	Pathogenic/Likely pathogenic	germline/somatic
TP53	17	7579311	7579311	C	T	TCGA-BR-8483-01A-31D-2394-08	STAD		17	7579311	7579311	C	T	NM_000546.6(TP53):c.375+1G>A	Pathogenic/Likely pathogenic	germline/somatic
TP53	17	7578406	7578406	C	T	TCGA-BR-8484-01A-11D-2394-08	STAD		17	7578406	7578406	C	T	NM_000546.6(TP53):c.524G>A (p.Arg175His)	Pathogenic	germline/somatic
TP53	17	7577539	7577539	G	A	TCGA-BR-8487-01A-11D-2394-08	STAD		17	7577539	7577539	G	A	NM_000546.6(TP53):c.742C>T (p.Arg248Trp)	Pathogenic	germline/somatic
TP53	17	7577084	7577084	T	A	TCGA-BR-8590-01A-11D-2394-08	STAD		17	7577084	7577084	T	A	NM_000546.6(TP53):c.854A>T (p.Glu285Val)	Pathogenic	germline
TP53	17	7577022	7577022	G	A	TCGA-BR-8682-01A-11D-2394-08	STAD		17	7577022	7577022	G	A	NM_000546.6(TP53):c.916C>T (p.Arg306Ter)	Pathogenic	germline/somatic
TP53	17	7578500	7578500	G	A	TCGA-BR-8690-01A-11D-2394-08	STAD		17	7578500	7578500	G	A	NM_000546.6(TP53):c.430C>T (p.Gln144Ter)	Pathogenic	germline/somatic
TP53	17	7577082	7577082	C	T	TCGA-BR-A44U-01A-11D-A24D-08	STAD		17	7577082	7577082	C	T	NM_000546.6(TP53):c.856G>A (p.Glu286Lys)	Pathogenic	germline/somatic
TP53	17	7578403	7578403	C	A	TCGA-BR-A452-01A-91D-A25D-08	STAD		17	7578403	7578403	C	A	NM_000546.6(TP53):c.527G>T (p.Cys176Phe)	Likely pathogenic	germline/somatic
TP53	17	7578403	7578403	C	A	TCGA-BR-A4CQ-01A-12D-A25D-08	STAD		17	7578403	7578403	C	A	NM_000546.6(TP53):c.527G>T (p.Cys176Phe)	Likely pathogenic	germline/somatic
TP53	17	7577082	7577082	C	T	TCGA-BR-A4CR-01A-11D-A24D-08	STAD		17	7577082	7577082	C	T	NM_000546.6(TP53):c.856G>A (p.Glu286Lys)	Pathogenic	germline/somatic
TP53	17	7578457	7578457	C	T	TCGA-BR-A4IU-01A-22D-A25D-08	STAD		17	7578457	7578457	C	T	NM_000546.6(TP53):c.473G>A (p.Arg158His)	Pathogenic/Likely pathogenic	germline
TP53	17	7578406	7578406	C	T	TCGA-BR-A4IY-01A-11D-A25D-08	STAD		17	7578406	7578406	C	T	NM_000546.6(TP53):c.524G>A (p.Arg175His)	Pathogenic	germline/somatic
TP53	17	7579414	7579414	C	T	TCGA-BR-A4PD-01A-11D-A25D-08	STAD		17	7579414	7579414	C	T	NM_000546.6(TP53):c.273G>A (p.Trp91Ter)	Pathogenic	germline/somatic
TP53	17	7577094	7577094	G	A	TCGA-BR-A4QI-01A-12D-A25D-08	STAD		17	7577094	7577094	G	A	NM_000546.6(TP53):c.844C>T (p.Arg282Trp)	Pathogenic/Likely pathogenic	germline/somatic
TP53	17	7577568	7577568	C	T	TCGA-BS-A0TI-01A-11D-A10B-09	UCEC		17	7577568	7577568	C	T	NM_000546.6(TP53):c.713G>A (p.Cys238Tyr)	Pathogenic/Likely pathogenic	germline/somatic
TP53	17	7578212	7578212	G	A	TCGA-BS-A0UF-01A-11D-A10B-09	UCEC		17	7578212	7578212	G	A	NM_000546.6(TP53):c.637C>T (p.Arg213Ter)	Pathogenic	germline/somatic
TP53	17	7578212	7578212	G	A	TCGA-BS-A0UV-01A-11D-A10B-09	UCEC		17	7578212	7578212	G	A	NM_000546.6(TP53):c.637C>T (p.Arg213Ter)	Pathogenic	germline/somatic
TP53	17	7578190	7578190	T	C	TCGA-BS-A0V8-01A-11D-A122-09	UCEC		17	7578190	7578190	T	C	NM_000546.6(TP53):c.659A>G (p.Tyr220Cys)	Pathogenic	germline/somatic
TP53	17	7577107	7577107	A	T	TCGA-BT-A20N-01A-11D-A14W-08	BLCA		17	7577107	7577107	A	T	NM_000546.6(TP53):c.831T>A (p.Cys277Ter)	Pathogenic	germline
TP53	17	7577121	7577121	G	A	TCGA-BT-A20U-01A-11D-A14W-08	BLCA		17	7577121	7577121	G	A	NM_000546.6(TP53):c.817C>T (p.Arg273Cys)	Pathogenic/Likely pathogenic	germline/somatic
TP53	17	7578239	7578239	C	A	TCGA-BT-A20X-01A-11D-A16O-08	BLCA		17	7578239	7578239	C	A	NM_000546.6(TP53):c.610G>T (p.Glu204Ter)	Pathogenic	somatic
TP53	17	7578211	7578211	C	T	TCGA-BT-A2LA-01A-11D-A18F-08	BLCA		17	7578211	7578211	C	T	NM_000546.6(TP53):c.638G>A (p.Arg213Gln)	Pathogenic	germline/somatic
TP53	17	7578269	7578269	G	A	TCGA-BT-A2LB-01A-11D-A18F-08	BLCA		17	7578269	7578269	G	A	NM_000546.6(TP53):c.580C>T (p.Leu194Phe)	Likely pathogenic	germline/somatic
TP53	17	7577538	7577538	C	T	TCGA-BT-A2LD-01A-12D-A20D-08	BLCA		17	7577538	7577538	C	T	NM_000546.6(TP53):c.743G>A (p.Arg248Gln)	Pathogenic	germline/somatic
TP53	17	7578382	7578382	G	C	TCGA-BT-A42F-01A-11D-A23U-08	BLCA		17	7578382	7578382	G	C	NM_000546.6(TP53):c.548C>G (p.Ser183Ter)	Pathogenic	germline/somatic
TP53	17	7578406	7578406	C	T	TCGA-BT-A42F-01A-11D-A23U-08	BLCA		17	7578406	7578406	C	T	NM_000546.6(TP53):c.524G>A (p.Arg175His)	Pathogenic	germline/somatic
TP53	17	7578275	7578275	G	A	TCGA-BW-A5NQ-01A-11D-A27I-10	LIHC		17	7578275	7578275	G	A	NM_000546.6(TP53):c.574C>T (p.Gln192Ter)	Pathogenic	germline
TP53	17	7577114	7577114	C	T	TCGA-C4-A0EZ-01A-21D-A10S-08	BLCA		17	7577114	7577114	C	T	NM_000546.6(TP53):c.824G>A (p.Cys275Tyr)	Pathogenic/Likely pathogenic	germline/somatic
TP53	17	7577568	7577568	C	A	TCGA-C4-A0F7-01A-11D-A10S-08	BLCA		17	7577568	7577568	C	A	NM_000546.6(TP53):c.713G>T (p.Cys238Phe)	Pathogenic	germline/somatic
TP53	17	7578382	7578382	G	C	TCGA-C5-A1M6-01A-11D-A13W-08	CESC		17	7578382	7578382	G	C	NM_000546.6(TP53):c.548C>G (p.Ser183Ter)	Pathogenic	germline/somatic
TP53	17	7578265	7578265	A	G	TCGA-C8-A12K-01A-21D-A10Y-09	BRCA		17	7578265	7578265	A	G	NM_000546.6(TP53):c.584T>C (p.Ile195Thr)	Pathogenic	germline/somatic
TP53	17	7577568	7577568	C	A	TCGA-C8-A12L-01A-11D-A10Y-09	BRCA		17	7577568	7577568	C	A	NM_000546.6(TP53):c.713G>T (p.Cys238Phe)	Pathogenic	germline/somatic
TP53	17	7577120	7577120	C	T	TCGA-C8-A12O-01A-11D-A10Y-09	BRCA		17	7577120	7577120	C	T	NM_000546.6(TP53):c.818G>A (p.Arg273His)	Pathogenic	germline/somatic
TP53	17	7577539	7577539	G	A	TCGA-C8-A12P-01A-11D-A10Y-09	BRCA		17	7577539	7577539	G	A	NM_000546.6(TP53):c.742C>T (p.Arg248Trp)	Pathogenic	germline/somatic
TP53	17	7578555	7578555	C	T	TCGA-C8-A12V-01A-11D-A10Y-09	BRCA		17	7578555	7578555	C	T	NM_000546.6(TP53):c.376-1G>A	Pathogenic/Likely pathogenic	germline/somatic
TP53	17	7578272	7578272	G	A	TCGA-C8-A12W-01A-11D-A10Y-09	BRCA		17	7578272	7578272	G	A	NM_000546.6(TP53):c.577C>T (p.His193Tyr)	Pathogenic/Likely pathogenic	germline/somatic
TP53	17	7574002	7574002	C	G	TCGA-C8-A12Z-01A-11D-A10Y-09	BRCA		17	7574002	7574002	C	G	NM_000546.6(TP53):c.1025G>C (p.Arg342Pro)	Pathogenic/Likely pathogenic	germline/somatic
TP53	17	7578406	7578406	C	T	TCGA-C8-A131-01A-11D-A10Y-09	BRCA		17	7578406	7578406	C	T	NM_000546.6(TP53):c.524G>A (p.Arg175His)	Pathogenic	germline/somatic
TP53	17	7577120	7577120	C	T	TCGA-C8-A134-01A-11D-A10Y-09	BRCA		17	7577120	7577120	C	T	NM_000546.6(TP53):c.818G>A (p.Arg273His)	Pathogenic	germline/somatic
TP53	17	7578395	7578395	G	A	TCGA-C8-A1HF-01A-11D-A135-09	BRCA		17	7578395	7578395	G	A	NM_000546.6(TP53):c.535C>T (p.His179Tyr)	Pathogenic/Likely pathogenic	germline/somatic
TP53	17	7578509	7578509	A	G	TCGA-C8-A1HG-01A-11D-A135-09	BRCA		17	7578509	7578509	A	G	NM_000546.6(TP53):c.421T>C (p.Cys141Arg)	Likely pathogenic	somatic
TP53	17	7578263	7578263	G	A	TCGA-C8-A1HJ-01A-11D-A13L-09	BRCA		17	7578263	7578263	G	A	NM_000546.6(TP53):c.586C>T (p.Arg196Ter)	Pathogenic	germline/somatic
TP53	17	7577586	7577586	A	C	TCGA-C8-A26V-01A-11D-A16D-09	BRCA		17	7577586	7577586	A	C	NM_000546.6(TP53):c.695T>G (p.Ile232Ser)	Likely pathogenic	somatic
TP53	17	7577120	7577120	C	A	TCGA-C8-A26W-01A-11D-A16D-09	BRCA		17	7577120	7577120	C	A	NM_000546.6(TP53):c.818G>T (p.Arg273Leu)	Pathogenic	germline/somatic
TP53	17	7577559	7577559	G	A	TCGA-C8-A26Y-01A-11D-A16D-09	BRCA		17	7577559	7577559	G	A	NM_000546.6(TP53):c.722C>T (p.Ser241Phe)	Likely pathogenic	germline/somatic
TP53	17	7577141	7577141	C	T	TCGA-C8-A275-01A-21D-A16D-09	BRCA		17	7577141	7577141	C	T	NM_000546.6(TP53):c.797G>A (p.Gly266Glu)	Pathogenic/Likely pathogenic	germline/somatic
TP53	17	7578253	7578253	C	A	TCGA-C8-A27A-01A-11D-A167-09	BRCA		17	7578253	7578253	C	A	NM_000546.6(TP53):c.596G>T (p.Gly199Val)	Likely pathogenic	germline
TP53	17	7578271	7578271	T	C	TCGA-C8-A27B-01A-11D-A167-09	BRCA		17	7578271	7578271	T	C	NM_000546.6(TP53):c.578A>G (p.His193Arg)	Pathogenic/Likely pathogenic	germline/somatic
TP53	17	7578265	7578265	A	G	TCGA-C9-A47Z-01A-11D-A24D-08	HNSC		17	7578265	7578265	A	G	NM_000546.6(TP53):c.584T>C (p.Ile195Thr)	Pathogenic	germline/somatic
TP53	17	7577547	7577547	C	T	TCGA-C9-A480-01A-12D-A24D-08	HNSC		17	7577547	7577547	C	T	NM_000546.6(TP53):c.734G>A (p.Gly245Asp)	Pathogenic/Likely pathogenic	germline/somatic
TP53	17	7578211	7578211	C	T	TCGA-CA-6715-01A-21D-1835-10	COAD		17	7578211	7578211	C	T	NM_000546.6(TP53):c.638G>A (p.Arg213Gln)	Pathogenic	germline/somatic
TP53	17	7578212	7578212	G	A	TCGA-CA-6718-01A-11D-1835-10	COAD		17	7578212	7578212	G	A	NM_000546.6(TP53):c.637C>T (p.Arg213Ter)	Pathogenic	germline/somatic
TP53	17	7576852	7576852	C	A	TCGA-CA-6719-01A-11D-1835-10	COAD		17	7576852	7576852	C	A	NM_000546.6(TP53):c.993+1G>T	Pathogenic	germline/somatic
TP53	17	7577107	7577107	A	T	TCGA-CC-5263-01A-01D-A12Z-10	LIHC		17	7577107	7577107	A	T	NM_000546.6(TP53):c.831T>A (p.Cys277Ter)	Pathogenic	germline
TP53	17	7578555	7578555	C	T	TCGA-CC-A1HT-01A-11D-A12Z-10	LIHC		17	7578555	7578555	C	T	NM_000546.6(TP53):c.376-1G>A	Pathogenic/Likely pathogenic	germline/somatic
TP53	17	7578188	7578188	C	A	TCGA-CC-A7IG-01A-11D-A33K-10	LIHC		17	7578188	7578188	C	A	NM_000546.6(TP53):c.661G>T (p.Glu221Ter)	Pathogenic	germline/somatic
TP53	17	7577120	7577120	C	T	TCGA-CC-A8HS-01A-11D-A35Z-10	LIHC		17	7577120	7577120	C	T	NM_000546.6(TP53):c.818G>A (p.Arg273His)	Pathogenic	germline/somatic
TP53	17	7577570	7577570	C	A	TCGA-CC-A8HT-01A-11D-A35Z-10	LIHC		17	7577570	7577570	C	A	NM_000546.6(TP53):c.711G>T (p.Met237Ile)	Likely pathogenic	somatic
TP53	17	7577538	7577538	C	T	TCGA-CD-5799-01A-11D-1600-08	STAD		17	7577538	7577538	C	T	NM_000546.6(TP53):c.743G>A (p.Arg248Gln)	Pathogenic	germline/somatic
TP53	17	7574018	7574018	G	A	TCGA-CD-5804-01A-12D-2053-08	STAD		17	7574018	7574018	G	A	NM_000546.6(TP53):c.1009C>T (p.Arg337Cys)	Pathogenic/Likely pathogenic	germline/somatic
TP53	17	7577094	7577094	G	A	TCGA-CD-5813-01A-11D-1600-08	STAD		17	7577094	7577094	G	A	NM_000546.6(TP53):c.844C>T (p.Arg282Trp)	Pathogenic/Likely pathogenic	germline/somatic
TP53	17	7578212	7578212	G	A	TCGA-CD-8524-01A-11D-2340-08	STAD		17	7578212	7578212	G	A	NM_000546.6(TP53):c.637C>T (p.Arg213Ter)	Pathogenic	germline/somatic
TP53	17	7578190	7578190	T	C	TCGA-CD-8525-01A-11D-2340-08	STAD		17	7578190	7578190	T	C	NM_000546.6(TP53):c.659A>G (p.Tyr220Cys)	Pathogenic	germline/somatic
TP53	17	7577124	7577124	C	T	TCGA-CD-8526-01A-11D-2340-08	STAD		17	7577124	7577124	C	T	NM_000546.6(TP53):c.814G>A (p.Val272Met)	Pathogenic	germline/somatic
TP53	17	7578479	7578479	G	T	TCGA-CD-8528-01A-11D-2340-08	STAD		17	7578479	7578479	G	T	NM_000546.6(TP53):c.451C>A (p.Pro151Thr)	Likely pathogenic	germline/somatic
TP53	17	7577556	7577556	C	T	TCGA-CD-8531-01A-11D-2340-08	STAD		17	7577556	7577556	C	T	NM_000546.6(TP53):c.725G>A (p.Cys242Tyr)	Pathogenic	germline/somatic
TP53	17	7578235	7578235	T	C	TCGA-CD-8533-01A-11D-2340-08	STAD		17	7578235	7578235	T	C	NM_000546.6(TP53):c.614A>G (p.Tyr205Cys)	Likely pathogenic	germline/somatic
TP53	17	7577022	7577022	G	A	TCGA-CD-8535-01A-11D-2340-08	STAD		17	7577022	7577022	G	A	NM_000546.6(TP53):c.916C>T (p.Arg306Ter)	Pathogenic	germline/somatic
TP53	17	7577538	7577538	C	T	TCGA-CD-A487-01A-21D-A24D-08	STAD		17	7577538	7577538	C	T	NM_000546.6(TP53):c.743G>A (p.Arg248Gln)	Pathogenic	germline/somatic
TP53	17	7577124	7577124	C	T	TCGA-CD-A48C-01A-11D-A24D-08	STAD		17	7577124	7577124	C	T	NM_000546.6(TP53):c.814G>A (p.Val272Met)	Pathogenic	germline/somatic
TP53	17	7577121	7577121	G	T	TCGA-CF-A1HS-01A-11D-A13W-08	BLCA		17	7577121	7577121	G	T	NM_000546.6(TP53):c.817C>A (p.Arg273Ser)	Pathogenic/Likely pathogenic	germline/somatic
TP53	17	7577539	7577539	G	A	TCGA-CF-A47Y-01A-11D-A23U-08	BLCA		17	7577539	7577539	G	A	NM_000546.6(TP53):c.742C>T (p.Arg248Trp)	Pathogenic	germline/somatic
TP53	17	7576897	7576897	G	A	TCGA-CG-4436-01A-01D-1158-08	STAD		17	7576897	7576897	G	A	NM_000546.6(TP53):c.949C>T (p.Gln317Ter)	Pathogenic/Likely pathogenic	germline
TP53	17	7578212	7578212	G	A	TCGA-CG-4438-01A-01D-1158-08	STAD		17	7578212	7578212	G	A	NM_000546.6(TP53):c.637C>T (p.Arg213Ter)	Pathogenic	germline/somatic
TP53	17	7578395	7578395	G	A	TCGA-CG-4444-01A-01D-1158-08	STAD		17	7578395	7578395	G	A	NM_000546.6(TP53):c.535C>T (p.His179Tyr)	Pathogenic/Likely pathogenic	germline/somatic
TP53	17	7577121	7577121	G	A	TCGA-CG-4460-01A-01D-1158-08	STAD		17	7577121	7577121	G	A	NM_000546.6(TP53):c.817C>T (p.Arg273Cys)	Pathogenic/Likely pathogenic	germline/somatic
TP53	17	7578212	7578212	G	A	TCGA-CG-4469-01A-01D-1158-08	STAD		17	7578212	7578212	G	A	NM_000546.6(TP53):c.637C>T (p.Arg213Ter)	Pathogenic	germline/somatic
TP53	17	7578403	7578403	C	A	TCGA-CG-5717-01A-11D-1600-08	STAD		17	7578403	7578403	C	A	NM_000546.6(TP53):c.527G>T (p.Cys176Phe)	Likely pathogenic	germline/somatic
TP53	17	7578556	7578556	T	C	TCGA-CG-5718-01A-11D-1600-08	STAD		17	7578556	7578556	T	C	NM_000546.6(TP53):c.376-2A>G	Likely pathogenic	germline/somatic
TP53	17	7577121	7577121	G	A	TCGA-CG-5721-01A-11D-1600-08	STAD		17	7577121	7577121	G	A	NM_000546.6(TP53):c.817C>T (p.Arg273Cys)	Pathogenic/Likely pathogenic	germline/somatic
TP53	17	7578190	7578190	T	C	TCGA-CG-5730-01A-11D-1600-08	STAD		17	7578190	7578190	T	C	NM_000546.6(TP53):c.659A>G (p.Tyr220Cys)	Pathogenic	germline/somatic
TP53	17	7577121	7577121	G	A	TCGA-CI-6621-01A-11D-1826-10	READ		17	7577121	7577121	G	A	NM_000546.6(TP53):c.817C>T (p.Arg273Cys)	Pathogenic/Likely pathogenic	germline/somatic
TP53	17	7578205	7578205	C	A	TCGA-CI-6623-01B-11D-1826-10	READ		17	7578205	7578205	C	A	NM_000546.6(TP53):c.644G>T (p.Ser215Ile)	Pathogenic	germline/somatic
TP53	17	7578406	7578406	C	T	TCGA-CI-6624-01C-11D-1826-10	READ		17	7578406	7578406	C	T	NM_000546.6(TP53):c.524G>A (p.Arg175His)	Pathogenic	germline/somatic
TP53	17	7577097	7577097	C	A	TCGA-CJ-5677-01A-11D-1534-10	KIRC		17	7577097	7577097	C	A	NM_000546.6(TP53):c.841G>T (p.Asp281Tyr)	Pathogenic	germline/somatic
TP53	17	7577538	7577538	C	T	TCGA-CK-5914-01A-11D-1650-10	COAD		17	7577538	7577538	C	T	NM_000546.6(TP53):c.743G>A (p.Arg248Gln)	Pathogenic	germline/somatic
TP53	17	7577022	7577022	G	A	TCGA-CK-5916-01A-11D-1650-10	COAD		17	7577022	7577022	G	A	NM_000546.6(TP53):c.916C>T (p.Arg306Ter)	Pathogenic	germline/somatic
TP53	17	7577539	7577539	G	A	TCGA-CL-4957-01A-01D-1733-10	READ		17	7577539	7577539	G	A	NM_000546.6(TP53):c.742C>T (p.Arg248Trp)	Pathogenic	germline/somatic
TP53	17	7577120	7577120	C	T	TCGA-CL-5917-01A-11D-1657-10	READ		17	7577120	7577120	C	T	NM_000546.6(TP53):c.818G>A (p.Arg273His)	Pathogenic	germline/somatic
TP53	17	7577094	7577094	G	A	TCGA-CL-5918-01A-11D-1657-10	READ		17	7577094	7577094	G	A	NM_000546.6(TP53):c.844C>T (p.Arg282Trp)	Pathogenic/Likely pathogenic	germline/somatic
TP53	17	7577538	7577538	C	T	TCGA-CM-4746-01A-01D-1408-10	COAD		17	7577538	7577538	C	T	NM_000546.6(TP53):c.743G>A (p.Arg248Gln)	Pathogenic	germline/somatic
TP53	17	7577565	7577565	T	C	TCGA-CM-4750-01A-01D-1408-10	COAD		17	7577565	7577565	T	C	NM_000546.6(TP53):c.716A>G (p.Asn239Ser)	Likely pathogenic	germline/somatic
TP53	17	7577141	7577141	C	T	TCGA-CM-4751-01A-02D-1835-10	COAD		17	7577141	7577141	C	T	NM_000546.6(TP53):c.797G>A (p.Gly266Glu)	Pathogenic/Likely pathogenic	germline/somatic
TP53	17	7577538	7577538	C	T	TCGA-CM-5341-01A-01D-1408-10	COAD		17	7577538	7577538	C	T	NM_000546.6(TP53):c.743G>A (p.Arg248Gln)	Pathogenic	germline/somatic
TP53	17	7578457	7578457	C	T	TCGA-CM-5341-01A-01D-1408-10	COAD		17	7578457	7578457	C	T	NM_000546.6(TP53):c.473G>A (p.Arg158His)	Pathogenic/Likely pathogenic	germline
TP53	17	7578235	7578235	T	C	TCGA-CM-5348-01A-21D-1719-10	COAD		17	7578235	7578235	T	C	NM_000546.6(TP53):c.614A>G (p.Tyr205Cys)	Likely pathogenic	germline/somatic
TP53	17	7579415	7579415	C	T	TCGA-CM-5860-01A-01D-1650-10	COAD		17	7579415	7579415	C	T	NM_000546.6(TP53):c.272G>A (p.Trp91Ter)	Likely pathogenic	germline
TP53	17	7577094	7577094	G	A	TCGA-CM-5862-01A-01D-1650-10	COAD		17	7577094	7577094	G	A	NM_000546.6(TP53):c.844C>T (p.Arg282Trp)	Pathogenic/Likely pathogenic	germline/somatic
TP53	17	7577094	7577094	G	A	TCGA-CM-5868-01A-01D-1650-10	COAD		17	7577094	7577094	G	A	NM_000546.6(TP53):c.844C>T (p.Arg282Trp)	Pathogenic/Likely pathogenic	germline/somatic
TP53	17	7577120	7577120	C	T	TCGA-CM-6163-01A-11D-1650-10	COAD		17	7577120	7577120	C	T	NM_000546.6(TP53):c.818G>A (p.Arg273His)	Pathogenic	germline/somatic
TP53	17	7576852	7576852	C	A	TCGA-CM-6165-01A-11D-1650-10	COAD		17	7576852	7576852	C	A	NM_000546.6(TP53):c.993+1G>T	Pathogenic	germline/somatic
TP53	17	7577139	7577139	G	A	TCGA-CM-6167-01A-11D-1650-10	COAD		17	7577139	7577139	G	A	NM_000546.6(TP53):c.799C>T (p.Arg267Trp)	Pathogenic/Likely pathogenic	germline/somatic
TP53	17	7577022	7577022	G	A	TCGA-CM-6169-01A-11D-1650-10	COAD		17	7577022	7577022	G	A	NM_000546.6(TP53):c.916C>T (p.Arg306Ter)	Pathogenic	germline/somatic
TP53	17	7577538	7577538	C	T	TCGA-CM-6172-01A-11D-1650-10	COAD		17	7577538	7577538	C	T	NM_000546.6(TP53):c.743G>A (p.Arg248Gln)	Pathogenic	germline/somatic
TP53	17	7579389	7579389	G	A	TCGA-CM-6172-01A-11D-1650-10	COAD		17	7579389	7579389	G	A	NM_000546.6(TP53):c.298C>T (p.Gln100Ter)	Pathogenic	somatic
TP53	17	7574003	7574003	G	A	TCGA-CM-6675-01A-11D-1835-10	COAD		17	7574003	7574003	G	A	NM_000546.6(TP53):c.1024C>T (p.Arg342Ter)	Pathogenic	germline/somatic
TP53	17	7577539	7577539	G	A	TCGA-CM-6676-01A-11D-1835-10	COAD		17	7577539	7577539	G	A	NM_000546.6(TP53):c.742C>T (p.Arg248Trp)	Pathogenic	germline/somatic
TP53	17	7577094	7577094	G	A	TCGA-CM-6677-01A-11D-1835-10	COAD		17	7577094	7577094	G	A	NM_000546.6(TP53):c.844C>T (p.Arg282Trp)	Pathogenic/Likely pathogenic	germline/somatic
TP53	17	7574017	7574017	C	A	TCGA-CN-4725-01A-01D-1434-08	HNSC		17	7574017	7574017	C	A	NM_000546.6(TP53):c.1010G>T (p.Arg337Leu)	Likely pathogenic	germline/somatic
TP53	17	7577114	7577114	C	A	TCGA-CN-4725-01A-01D-1434-08	HNSC		17	7577114	7577114	C	A	NM_000546.6(TP53):c.824G>T (p.Cys275Phe)	Likely pathogenic	somatic
TP53	17	7579310	7579310	A	T	TCGA-CN-4726-01A-01D-1434-08	HNSC		17	7579310	7579310	A	T	NM_000546.6(TP53):c.375+2T>A	Pathogenic/Likely pathogenic	germline
TP53	17	7577046	7577046	C	A	TCGA-CN-4727-01A-01D-1434-08	HNSC		17	7577046	7577046	C	A	NM_000546.6(TP53):c.892G>T (p.Glu298Ter)	Pathogenic	germline/somatic
TP53	17	7578419	7578419	C	A	TCGA-CN-4731-01A-01D-1434-08	HNSC		17	7578419	7578419	C	A	NM_000546.6(TP53):c.511G>T (p.Glu171Ter)	Pathogenic	germline/somatic
TP53	17	7577120	7577120	C	T	TCGA-CN-4733-01A-02D-1870-08	HNSC		17	7577120	7577120	C	T	NM_000546.6(TP53):c.818G>A (p.Arg273His)	Pathogenic	germline/somatic
TP53	17	7577570	7577570	C	T	TCGA-CN-4735-01A-01D-1434-08	HNSC		17	7577570	7577570	C	T	NM_000546.6(TP53):c.711G>A (p.Met237Ile)	Pathogenic	germline/somatic
TP53	17	7578271	7578271	T	G	TCGA-CN-4736-01A-01D-1434-08	HNSC		17	7578271	7578271	T	G	NM_000546.6(TP53):c.578A>C (p.His193Pro)	Pathogenic	germline/somatic
TP53	17	7578395	7578395	G	A	TCGA-CN-4736-01A-01D-1434-08	HNSC		17	7578395	7578395	G	A	NM_000546.6(TP53):c.535C>T (p.His179Tyr)	Pathogenic/Likely pathogenic	germline/somatic
TP53	17	7576855	7576855	G	A	TCGA-CN-4738-01A-02D-1512-08	HNSC		17	7576855	7576855	G	A	NM_000546.6(TP53):c.991C>T (p.Gln331Ter)	Pathogenic	germline
TP53	17	7574018	7574018	G	A	TCGA-CN-4739-01A-02D-1512-08	HNSC		17	7574018	7574018	G	A	NM_000546.6(TP53):c.1009C>T (p.Arg337Cys)	Pathogenic/Likely pathogenic	germline/somatic
TP53	17	7579591	7579591	C	T	TCGA-CN-4740-01A-01D-1434-08	HNSC		17	7579591	7579591	C	T	NM_000546.6(TP53):c.97-1G>A	Likely pathogenic	germline/somatic
TP53	17	7577058	7577058	C	A	TCGA-CN-4742-01A-02D-1512-08	HNSC		17	7577058	7577058	C	A	NM_000546.6(TP53):c.880G>T (p.Glu294Ter)	Pathogenic	germline/somatic
TP53	17	7577120	7577120	C	T	TCGA-CN-5356-01A-01D-1434-08	HNSC		17	7577120	7577120	C	T	NM_000546.6(TP53):c.818G>A (p.Arg273His)	Pathogenic	germline/somatic
TP53	17	7577046	7577046	C	A	TCGA-CN-5364-01A-01D-1434-08	HNSC		17	7577046	7577046	C	A	NM_000546.6(TP53):c.892G>T (p.Glu298Ter)	Pathogenic	germline/somatic
TP53	17	7578413	7578413	C	T	TCGA-CN-5366-01A-01D-1434-08	HNSC		17	7578413	7578413	C	T	NM_000546.6(TP53):c.517G>A (p.Val173Met)	Pathogenic	germline/somatic
TP53	17	7577121	7577121	G	A	TCGA-CN-5367-01A-01D-1434-08	HNSC		17	7577121	7577121	G	A	NM_000546.6(TP53):c.817C>T (p.Arg273Cys)	Pathogenic/Likely pathogenic	germline/somatic
TP53	17	7578406	7578406	C	T	TCGA-CN-5370-01A-01D-2012-08	HNSC		17	7578406	7578406	C	T	NM_000546.6(TP53):c.524G>A (p.Arg175His)	Pathogenic	germline/somatic
TP53	17	7578555	7578555	C	T	TCGA-CN-5370-01A-01D-2012-08	HNSC		17	7578555	7578555	C	T	NM_000546.6(TP53):c.376-1G>A	Pathogenic/Likely pathogenic	germline/somatic
TP53	17	7577547	7577547	C	A	TCGA-CN-5373-01A-01D-1434-08	HNSC		17	7577547	7577547	C	A	NM_000546.6(TP53):c.734G>T (p.Gly245Val)	Pathogenic	germline/somatic
TP53	17	7577094	7577094	G	A	TCGA-CN-6013-01A-11D-1683-08	HNSC		17	7577094	7577094	G	A	NM_000546.6(TP53):c.844C>T (p.Arg282Trp)	Pathogenic/Likely pathogenic	germline/somatic
TP53	17	7577548	7577548	C	T	TCGA-CN-6016-01A-11D-1683-08	HNSC		17	7577548	7577548	C	T	NM_000546.6(TP53):c.733G>A (p.Gly245Ser)	Pathogenic	germline/somatic
TP53	17	7577539	7577539	G	A	TCGA-CN-6018-01A-11D-1683-08	HNSC		17	7577539	7577539	G	A	NM_000546.6(TP53):c.742C>T (p.Arg248Trp)	Pathogenic	germline/somatic
TP53	17	7577498	7577498	C	T	TCGA-CN-6022-01A-21D-1683-08	HNSC		17	7577498	7577498	C	T	NM_000546.6(TP53):c.782+1G>A	Pathogenic	germline/somatic
TP53	17	7577539	7577539	G	A	TCGA-CN-6022-01A-21D-1683-08	HNSC		17	7577539	7577539	G	A	NM_000546.6(TP53):c.742C>T (p.Arg248Trp)	Pathogenic	germline/somatic
TP53	17	7577548	7577548	C	T	TCGA-CN-6023-01A-11D-1683-08	HNSC		17	7577548	7577548	C	T	NM_000546.6(TP53):c.733G>A (p.Gly245Ser)	Pathogenic	germline/somatic
TP53	17	7577547	7577547	C	T	TCGA-CN-6992-01A-11D-1912-08	HNSC		17	7577547	7577547	C	T	NM_000546.6(TP53):c.734G>A (p.Gly245Asp)	Pathogenic/Likely pathogenic	germline/somatic
TP53	17	7578406	7578406	C	T	TCGA-CN-6994-01A-11D-1912-08	HNSC		17	7578406	7578406	C	T	NM_000546.6(TP53):c.524G>A (p.Arg175His)	Pathogenic	germline/somatic
TP53	17	7577046	7577046	C	A	TCGA-CN-6995-01A-31D-2012-08	HNSC		17	7577046	7577046	C	A	NM_000546.6(TP53):c.892G>T (p.Glu298Ter)	Pathogenic	germline/somatic
TP53	17	7577568	7577568	C	A	TCGA-CN-6996-01A-11D-1912-08	HNSC		17	7577568	7577568	C	A	NM_000546.6(TP53):c.713G>T (p.Cys238Phe)	Pathogenic	germline/somatic
TP53	17	7577022	7577022	G	A	TCGA-CN-6998-01A-23D-2012-08	HNSC		17	7577022	7577022	G	A	NM_000546.6(TP53):c.916C>T (p.Arg306Ter)	Pathogenic	germline/somatic
TP53	17	7577142	7577142	C	A	TCGA-CN-A497-01A-11D-A24D-08	HNSC		17	7577142	7577142	C	A	NM_000546.6(TP53):c.796G>T (p.Gly266Ter)	Pathogenic	germline
TP53	17	7577121	7577121	G	A	TCGA-CN-A49A-01A-11D-A24D-08	HNSC		17	7577121	7577121	G	A	NM_000546.6(TP53):c.817C>T (p.Arg273Cys)	Pathogenic/Likely pathogenic	germline/somatic
TP53	17	7577094	7577094	G	A	TCGA-CN-A49B-01A-31D-A24D-08	HNSC		17	7577094	7577094	G	A	NM_000546.6(TP53):c.844C>T (p.Arg282Trp)	Pathogenic/Likely pathogenic	germline/somatic
TP53	17	7577046	7577046	C	A	TCGA-CN-A63W-01A-11D-A30E-08	HNSC		17	7577046	7577046	C	A	NM_000546.6(TP53):c.892G>T (p.Glu298Ter)	Pathogenic	germline/somatic
TP53	17	7577097	7577097	C	A	TCGA-CN-A641-01A-11D-A30E-08	HNSC		17	7577097	7577097	C	A	NM_000546.6(TP53):c.841G>T (p.Asp281Tyr)	Pathogenic	germline/somatic
TP53	17	7579373	7579373	C	A	TCGA-CN-A6V3-01A-12D-A34J-08	HNSC		17	7579373	7579373	C	A	NM_000546.6(TP53):c.314G>T (p.Gly105Val)	Likely pathogenic	somatic
TP53	17	7577120	7577120	C	T	TCGA-CQ-5329-01A-01D-1683-08	HNSC		17	7577120	7577120	C	T	NM_000546.6(TP53):c.818G>A (p.Arg273His)	Pathogenic	germline/somatic
TP53	17	7576927	7576927	C	G	TCGA-CQ-5331-01A-02D-1870-08	HNSC		17	7576927	7576927	C	G	NM_000546.6(TP53):c.920-1G>C	Likely pathogenic	germline
TP53	17	7578479	7578479	G	A	TCGA-CQ-5332-01A-01D-1683-08	HNSC		17	7578479	7578479	G	A	NM_000546.6(TP53):c.451C>T (p.Pro151Ser)	Pathogenic/Likely pathogenic	germline/somatic
TP53	17	7578403	7578403	C	A	TCGA-CQ-5333-01A-01D-2394-08	HNSC		17	7578403	7578403	C	A	NM_000546.6(TP53):c.527G>T (p.Cys176Phe)	Likely pathogenic	germline/somatic
TP53	17	7578433	7578433	G	C	TCGA-CQ-5334-01A-01D-1683-08	HNSC		17	7578433	7578433	G	C	NM_000546.6(TP53):c.497C>G (p.Ser166Ter)	Pathogenic	somatic
TP53	17	7578457	7578457	C	T	TCGA-CQ-5334-01A-01D-1683-08	HNSC		17	7578457	7578457	C	T	NM_000546.6(TP53):c.473G>A (p.Arg158His)	Pathogenic/Likely pathogenic	germline
TP53	17	7578211	7578211	C	G	TCGA-CQ-6219-01A-11D-1912-08	HNSC		17	7578211	7578211	C	G	NM_000546.6(TP53):c.638G>C (p.Arg213Pro)	Pathogenic/Likely pathogenic	germline/somatic
TP53	17	7577124	7577124	C	T	TCGA-CQ-6221-01A-11D-2078-08	HNSC		17	7577124	7577124	C	T	NM_000546.6(TP53):c.814G>A (p.Val272Met)	Pathogenic	germline/somatic
TP53	17	7577094	7577094	G	A	TCGA-CQ-6222-01A-11D-1912-08	HNSC		17	7577094	7577094	G	A	NM_000546.6(TP53):c.844C>T (p.Arg282Trp)	Pathogenic/Likely pathogenic	germline/somatic
TP53	17	7578212	7578212	G	A	TCGA-CQ-6222-01A-11D-1912-08	HNSC		17	7578212	7578212	G	A	NM_000546.6(TP53):c.637C>T (p.Arg213Ter)	Pathogenic	germline/somatic
TP53	17	7577538	7577538	C	T	TCGA-CQ-6224-01A-11D-1912-08	HNSC		17	7577538	7577538	C	T	NM_000546.6(TP53):c.743G>A (p.Arg248Gln)	Pathogenic	germline/somatic
TP53	17	7578212	7578212	G	A	TCGA-CQ-6229-01A-11D-1912-08	HNSC		17	7578212	7578212	G	A	NM_000546.6(TP53):c.637C>T (p.Arg213Ter)	Pathogenic	germline/somatic
TP53	17	7577548	7577548	C	T	TCGA-CQ-7064-01A-11D-2394-08	HNSC		17	7577548	7577548	C	T	NM_000546.6(TP53):c.733G>A (p.Gly245Ser)	Pathogenic	germline/somatic
TP53	17	7578442	7578442	T	C	TCGA-CQ-7064-01A-11D-2394-08	HNSC		17	7578442	7578442	T	C	NM_000546.6(TP53):c.488A>G (p.Tyr163Cys)	Pathogenic	germline/somatic
TP53	17	7578394	7578394	T	G	TCGA-CQ-7065-01A-11D-2078-08	HNSC		17	7578394	7578394	T	G	NM_000546.6(TP53):c.536A>C (p.His179Pro)	Likely pathogenic	germline/somatic
TP53	17	7577058	7577058	C	A	TCGA-CQ-A4C6-01A-11D-A25D-08	HNSC		17	7577058	7577058	C	A	NM_000546.6(TP53):c.880G>T (p.Glu294Ter)	Pathogenic	germline/somatic
TP53	17	7577025	7577025	T	A	TCGA-CQ-A4C7-01A-11D-A25D-08	HNSC		17	7577025	7577025	T	A	NM_000546.6(TP53):c.913A>T (p.Lys305Ter)	Pathogenic	germline
TP53	17	7578263	7578263	G	A	TCGA-CQ-A4CE-01A-11D-A25Y-08	HNSC		17	7578263	7578263	G	A	NM_000546.6(TP53):c.586C>T (p.Arg196Ter)	Pathogenic	germline/somatic
TP53	17	7577547	7577547	C	A	TCGA-CR-6474-01A-11D-1870-08	HNSC		17	7577547	7577547	C	A	NM_000546.6(TP53):c.734G>T (p.Gly245Val)	Pathogenic	germline/somatic
TP53	17	7578263	7578263	G	A	TCGA-CR-6484-01A-11D-1870-08	HNSC		17	7578263	7578263	G	A	NM_000546.6(TP53):c.586C>T (p.Arg196Ter)	Pathogenic	germline/somatic
TP53	17	7578550	7578550	G	T	TCGA-CR-6493-01A-11D-1870-08	HNSC		17	7578550	7578550	G	T	NM_000546.6(TP53):c.380C>A (p.Ser127Tyr)	Pathogenic	germline
TP53	17	7577538	7577538	C	T	TCGA-CR-7368-01A-11D-2129-08	HNSC		17	7577538	7577538	C	T	NM_000546.6(TP53):c.743G>A (p.Arg248Gln)	Pathogenic	germline/somatic
TP53	17	7577569	7577569	A	T	TCGA-CR-7370-01A-11D-2129-08	HNSC		17	7577569	7577569	A	T	NM_000546.6(TP53):c.712T>A (p.Cys238Ser)	Pathogenic	germline
TP53	17	7578406	7578406	C	T	TCGA-CR-7371-01A-11D-2012-08	HNSC		17	7578406	7578406	C	T	NM_000546.6(TP53):c.524G>A (p.Arg175His)	Pathogenic	germline/somatic
TP53	17	7577098	7577098	T	G	TCGA-CR-7376-01A-11D-2129-08	HNSC		17	7577098	7577098	T	G	NM_000546.6(TP53):c.840A>C (p.Arg280Ser)	Likely pathogenic	somatic
TP53	17	7577022	7577022	G	A	TCGA-CR-7377-01A-11D-2012-08	HNSC		17	7577022	7577022	G	A	NM_000546.6(TP53):c.916C>T (p.Arg306Ter)	Pathogenic	germline/somatic
TP53	17	7577094	7577094	G	A	TCGA-CR-7380-01A-11D-2012-08	HNSC		17	7577094	7577094	G	A	NM_000546.6(TP53):c.844C>T (p.Arg282Trp)	Pathogenic/Likely pathogenic	germline/somatic
TP53	17	7576852	7576852	C	T	TCGA-CR-7383-01A-11D-2129-08	HNSC		17	7576852	7576852	C	T	NM_000546.6(TP53):c.993+1G>A	Pathogenic	germline/somatic
TP53	17	7577121	7577121	G	A	TCGA-CR-7388-01A-11D-2012-08	HNSC		17	7577121	7577121	G	A	NM_000546.6(TP53):c.817C>T (p.Arg273Cys)	Pathogenic/Likely pathogenic	germline/somatic
TP53	17	7577539	7577539	G	A	TCGA-CR-7397-01A-11D-2012-08	HNSC		17	7577539	7577539	G	A	NM_000546.6(TP53):c.742C>T (p.Arg248Trp)	Pathogenic	germline/somatic
TP53	17	7574017	7574017	C	A	TCGA-CR-7398-01A-11D-2012-08	HNSC		17	7574017	7574017	C	A	NM_000546.6(TP53):c.1010G>T (p.Arg337Leu)	Likely pathogenic	germline/somatic
TP53	17	7577539	7577539	G	A	TCGA-CS-4938-01B-11D-1893-08	LGG		17	7577539	7577539	G	A	NM_000546.6(TP53):c.742C>T (p.Arg248Trp)	Pathogenic	germline/somatic
TP53	17	7577114	7577114	C	A	TCGA-CS-4942-01A-01D-1468-08	LGG		17	7577114	7577114	C	A	NM_000546.6(TP53):c.824G>T (p.Cys275Phe)	Likely pathogenic	somatic
TP53	17	7578190	7578190	T	C	TCGA-CS-4943-01A-01D-1468-08	LGG		17	7578190	7578190	T	C	NM_000546.6(TP53):c.659A>G (p.Tyr220Cys)	Pathogenic	germline/somatic
TP53	17	7577120	7577120	C	T	TCGA-CS-5396-01A-02D-1468-08	LGG		17	7577120	7577120	C	T	NM_000546.6(TP53):c.818G>A (p.Arg273His)	Pathogenic	germline/somatic
TP53	17	7578406	7578406	C	T	TCGA-CS-6666-01A-11D-1893-08	LGG		17	7578406	7578406	C	T	NM_000546.6(TP53):c.524G>A (p.Arg175His)	Pathogenic	germline/somatic
TP53	17	7578208	7578208	T	C	TCGA-CS-6667-01A-12D-2024-08	LGG		17	7578208	7578208	T	C	NM_000546.6(TP53):c.641A>G (p.His214Arg)	Likely pathogenic	germline/somatic
TP53	17	7577094	7577094	G	A	TCGA-CV-5430-01A-02D-1683-08	HNSC		17	7577094	7577094	G	A	NM_000546.6(TP53):c.844C>T (p.Arg282Trp)	Pathogenic/Likely pathogenic	germline/somatic
TP53	17	7577018	7577018	C	A	TCGA-CV-5432-01A-02D-1683-08	HNSC		17	7577018	7577018	C	A	NM_000546.6(TP53):c.919+1G>T	Likely pathogenic	germline/somatic
TP53	17	7578212	7578212	G	A	TCGA-CV-5434-01A-01D-1683-08	HNSC		17	7578212	7578212	G	A	NM_000546.6(TP53):c.637C>T (p.Arg213Ter)	Pathogenic	germline/somatic
TP53	17	7579415	7579415	C	T	TCGA-CV-5435-01A-01D-1683-08	HNSC		17	7579415	7579415	C	T	NM_000546.6(TP53):c.272G>A (p.Trp91Ter)	Likely pathogenic	germline
TP53	17	7577141	7577141	C	T	TCGA-CV-5436-01A-01D-1512-08	HNSC		17	7577141	7577141	C	T	NM_000546.6(TP53):c.797G>A (p.Gly266Glu)	Pathogenic/Likely pathogenic	germline/somatic
TP53	17	7578403	7578403	C	T	TCGA-CV-5440-01A-01D-1512-08	HNSC		17	7578403	7578403	C	T	NM_000546.6(TP53):c.527G>A (p.Cys176Tyr)	Pathogenic	germline/somatic
TP53	17	7579358	7579358	C	A	TCGA-CV-5440-01A-01D-1512-08	HNSC		17	7579358	7579358	C	A	NM_000546.6(TP53):c.329G>T (p.Arg110Leu)	Pathogenic/Likely pathogenic	germline/somatic
TP53	17	7578479	7578479	G	T	TCGA-CV-5966-01A-11D-1683-08	HNSC		17	7578479	7578479	G	T	NM_000546.6(TP53):c.451C>A (p.Pro151Thr)	Likely pathogenic	germline/somatic
TP53	17	7577538	7577538	C	T	TCGA-CV-5970-01A-11D-1683-08	HNSC		17	7577538	7577538	C	T	NM_000546.6(TP53):c.743G>A (p.Arg248Gln)	Pathogenic	germline/somatic
TP53	17	7577094	7577094	G	A	TCGA-CV-5973-01A-11D-1683-08	HNSC		17	7577094	7577094	G	A	NM_000546.6(TP53):c.844C>T (p.Arg282Trp)	Pathogenic/Likely pathogenic	germline/somatic
TP53	17	7578190	7578190	T	C	TCGA-CV-5976-01A-11D-1683-08	HNSC		17	7578190	7578190	T	C	NM_000546.6(TP53):c.659A>G (p.Tyr220Cys)	Pathogenic	germline/somatic
TP53	17	7579358	7579358	C	A	TCGA-CV-5976-01A-11D-1683-08	HNSC		17	7579358	7579358	C	A	NM_000546.6(TP53):c.329G>T (p.Arg110Leu)	Pathogenic/Likely pathogenic	germline/somatic
TP53	17	7577082	7577082	C	T	TCGA-CV-5977-01A-11D-1683-08	HNSC		17	7577082	7577082	C	T	NM_000546.6(TP53):c.856G>A (p.Glu286Lys)	Pathogenic	germline/somatic
TP53	17	7578416	7578416	C	A	TCGA-CV-5978-01A-11D-1683-08	HNSC		17	7578416	7578416	C	A	NM_000546.6(TP53):c.514G>T (p.Val172Phe)	Likely pathogenic	germline
TP53	17	7577538	7577538	C	T	TCGA-CV-5979-01A-11D-1683-08	HNSC		17	7577538	7577538	C	T	NM_000546.6(TP53):c.743G>A (p.Arg248Gln)	Pathogenic	germline/somatic
TP53	17	7574003	7574003	G	A	TCGA-CV-6003-01A-11D-1683-08	HNSC		17	7574003	7574003	G	A	NM_000546.6(TP53):c.1024C>T (p.Arg342Ter)	Pathogenic	germline/somatic
TP53	17	7577120	7577120	C	T	TCGA-CV-6436-01A-11D-1683-08	HNSC		17	7577120	7577120	C	T	NM_000546.6(TP53):c.818G>A (p.Arg273His)	Pathogenic	germline/somatic
TP53	17	7578275	7578275	G	A	TCGA-CV-6933-01A-11D-1912-08	HNSC		17	7578275	7578275	G	A	NM_000546.6(TP53):c.574C>T (p.Gln192Ter)	Pathogenic	germline
TP53	17	7578235	7578235	T	C	TCGA-CV-6934-01A-11D-1912-08	HNSC		17	7578235	7578235	T	C	NM_000546.6(TP53):c.614A>G (p.Tyr205Cys)	Likely pathogenic	germline/somatic
TP53	17	7578413	7578413	C	A	TCGA-CV-6936-01A-11D-1912-08	HNSC		17	7578413	7578413	C	A	NM_000546.6(TP53):c.517G>T (p.Val173Leu)	Pathogenic	germline/somatic
TP53	17	7576855	7576855	G	A	TCGA-CV-6942-01A-21D-2012-08	HNSC		17	7576855	7576855	G	A	NM_000546.6(TP53):c.991C>T (p.Gln331Ter)	Pathogenic	germline
TP53	17	7578212	7578212	G	A	TCGA-CV-6942-01A-21D-2012-08	HNSC		17	7578212	7578212	G	A	NM_000546.6(TP53):c.637C>T (p.Arg213Ter)	Pathogenic	germline/somatic
TP53	17	7577539	7577539	G	A	TCGA-CV-6943-01A-11D-1912-08	HNSC		17	7577539	7577539	G	A	NM_000546.6(TP53):c.742C>T (p.Arg248Trp)	Pathogenic	germline/somatic
TP53	17	7576928	7576928	T	C	TCGA-CV-6948-01A-11D-1912-08	HNSC		17	7576928	7576928	T	C	NM_000546.6(TP53):c.920-2A>G	Pathogenic/Likely pathogenic	germline/somatic
TP53	17	7577129	7577129	A	C	TCGA-CV-6951-01A-11D-1912-08	HNSC		17	7577129	7577129	A	C	NM_000546.6(TP53):c.809T>G (p.Phe270Cys)	Likely pathogenic	somatic
TP53	17	7577114	7577114	C	A	TCGA-CV-6952-01A-11D-1912-08	HNSC		17	7577114	7577114	C	A	NM_000546.6(TP53):c.824G>T (p.Cys275Phe)	Likely pathogenic	somatic
TP53	17	7577539	7577539	G	A	TCGA-CV-6953-01A-11D-1912-08	HNSC		17	7577539	7577539	G	A	NM_000546.6(TP53):c.742C>T (p.Arg248Trp)	Pathogenic	germline/somatic
TP53	17	7577142	7577142	C	A	TCGA-CV-6960-01A-41D-2012-08	HNSC		17	7577142	7577142	C	A	NM_000546.6(TP53):c.796G>T (p.Gly266Ter)	Pathogenic	germline
TP53	17	7578271	7578271	T	C	TCGA-CV-6962-01A-11D-1912-08	HNSC		17	7578271	7578271	T	C	NM_000546.6(TP53):c.578A>G (p.His193Arg)	Pathogenic/Likely pathogenic	germline/somatic
TP53	17	7578442	7578442	T	C	TCGA-CV-7089-01A-11D-2012-08	HNSC		17	7578442	7578442	T	C	NM_000546.6(TP53):c.488A>G (p.Tyr163Cys)	Pathogenic	germline/somatic
TP53	17	7577120	7577120	C	T	TCGA-CV-7090-01A-11D-2012-08	HNSC		17	7577120	7577120	C	T	NM_000546.6(TP53):c.818G>A (p.Arg273His)	Pathogenic	germline/somatic
TP53	17	7578263	7578263	G	A	TCGA-CV-7095-01A-21D-2012-08	HNSC		17	7578263	7578263	G	A	NM_000546.6(TP53):c.586C>T (p.Arg196Ter)	Pathogenic	germline/somatic
TP53	17	7577085	7577085	C	T	TCGA-CV-7099-01A-41D-2012-08	HNSC		17	7577085	7577085	C	T	NM_000546.6(TP53):c.853G>A (p.Glu285Lys)	Pathogenic/Likely pathogenic	germline/somatic
TP53	17	7578419	7578419	C	A	TCGA-CV-7101-01A-11D-2012-08	HNSC		17	7578419	7578419	C	A	NM_000546.6(TP53):c.511G>T (p.Glu171Ter)	Pathogenic	germline/somatic
TP53	17	7577141	7577141	C	T	TCGA-CV-7102-01A-11D-2012-08	HNSC		17	7577141	7577141	C	T	NM_000546.6(TP53):c.797G>A (p.Gly266Glu)	Pathogenic/Likely pathogenic	germline/somatic
TP53	17	7577609	7577609	C	T	TCGA-CV-7104-01A-11D-2012-08	HNSC		17	7577609	7577609	C	T	NM_000546.6(TP53):c.673-1G>A	Pathogenic	germline
TP53	17	7577539	7577539	G	A	TCGA-CV-7180-01A-11D-2012-08	HNSC		17	7577539	7577539	G	A	NM_000546.6(TP53):c.742C>T (p.Arg248Trp)	Pathogenic	germline/somatic
TP53	17	7577580	7577580	T	C	TCGA-CV-7235-01A-11D-2012-08	HNSC		17	7577580	7577580	T	C	NM_000546.6(TP53):c.701A>G (p.Tyr234Cys)	Pathogenic/Likely pathogenic	germline/somatic
TP53	17	7578263	7578263	G	A	TCGA-CV-7238-01A-11D-2012-08	HNSC		17	7578263	7578263	G	A	NM_000546.6(TP53):c.586C>T (p.Arg196Ter)	Pathogenic	germline/somatic
TP53	17	7578413	7578413	C	T	TCGA-CV-7242-01A-11D-2012-08	HNSC		17	7578413	7578413	C	T	NM_000546.6(TP53):c.517G>A (p.Val173Met)	Pathogenic	germline/somatic
TP53	17	7577094	7577094	G	A	TCGA-CV-7245-01A-11D-2012-08	HNSC		17	7577094	7577094	G	A	NM_000546.6(TP53):c.844C>T (p.Arg282Trp)	Pathogenic/Likely pathogenic	germline/somatic
TP53	17	7578534	7578534	C	G	TCGA-CV-7247-01A-11D-2012-08	HNSC		17	7578534	7578534	C	G	NM_000546.6(TP53):c.396G>C (p.Lys132Asn)	Likely pathogenic	germline/somatic
TP53	17	7577022	7577022	G	A	TCGA-CV-7255-01A-11D-2012-08	HNSC		17	7577022	7577022	G	A	NM_000546.6(TP53):c.916C>T (p.Arg306Ter)	Pathogenic	germline/somatic
TP53	17	7579378	7579378	G	C	TCGA-CV-7263-01A-11D-2012-08	HNSC		17	7579378	7579378	G	C	NM_000546.6(TP53):c.309C>G (p.Tyr103Ter)	Pathogenic	germline
TP53	17	7578406	7578406	C	T	TCGA-CV-7407-01A-11D-2078-08	HNSC		17	7578406	7578406	C	T	NM_000546.6(TP53):c.524G>A (p.Arg175His)	Pathogenic	germline/somatic
TP53	17	7577085	7577085	C	T	TCGA-CV-7414-01A-11D-2078-08	HNSC		17	7577085	7577085	C	T	NM_000546.6(TP53):c.853G>A (p.Glu285Lys)	Pathogenic/Likely pathogenic	germline/somatic
TP53	17	7578406	7578406	C	T	TCGA-CV-7416-01A-11D-2078-08	HNSC		17	7578406	7578406	C	T	NM_000546.6(TP53):c.524G>A (p.Arg175His)	Pathogenic	germline/somatic
TP53	17	7579377	7579377	G	A	TCGA-CV-7422-01A-21D-2078-08	HNSC		17	7579377	7579377	G	A	NM_000546.6(TP53):c.310C>T (p.Gln104Ter)	Pathogenic	germline/somatic
TP53	17	7574012	7574012	C	A	TCGA-CV-7423-01A-11D-2078-08	HNSC		17	7574012	7574012	C	A	NM_000546.6(TP53):c.1015G>T (p.Glu339Ter)	Pathogenic	germline
TP53	17	7577022	7577022	G	A	TCGA-CV-7424-01A-11D-2078-08	HNSC		17	7577022	7577022	G	A	NM_000546.6(TP53):c.916C>T (p.Arg306Ter)	Pathogenic	germline/somatic
TP53	17	7578190	7578190	T	C	TCGA-CV-7435-01A-11D-2129-08	HNSC		17	7578190	7578190	T	C	NM_000546.6(TP53):c.659A>G (p.Tyr220Cys)	Pathogenic	germline/somatic
TP53	17	7578212	7578212	G	A	TCGA-CV-7438-01A-21D-2129-08	HNSC		17	7578212	7578212	G	A	NM_000546.6(TP53):c.637C>T (p.Arg213Ter)	Pathogenic	germline/somatic
TP53	17	7578442	7578442	T	C	TCGA-CV-7446-01A-11D-2229-08	HNSC		17	7578442	7578442	T	C	NM_000546.6(TP53):c.488A>G (p.Tyr163Cys)	Pathogenic	germline/somatic
TP53	17	7577046	7577046	C	A	TCGA-CV-A45U-01A-12D-A24D-08	HNSC		17	7577046	7577046	C	A	NM_000546.6(TP53):c.892G>T (p.Glu298Ter)	Pathogenic	germline/somatic
TP53	17	7577046	7577046	C	A	TCGA-CV-A45W-01A-11D-A25D-08	HNSC		17	7577046	7577046	C	A	NM_000546.6(TP53):c.892G>T (p.Glu298Ter)	Pathogenic	germline/somatic
TP53	17	7578190	7578190	T	C	TCGA-CV-A45W-01A-11D-A25D-08	HNSC		17	7578190	7578190	T	C	NM_000546.6(TP53):c.659A>G (p.Tyr220Cys)	Pathogenic	germline/somatic
TP53	17	7579699	7579699	C	A	TCGA-CV-A45X-01A-21D-A25D-08	HNSC		17	7579699	7579699	C	A	NM_000546.6(TP53):c.96+1G>T	Pathogenic/Likely pathogenic	germline
TP53	17	7578290	7578290	C	T	TCGA-CV-A45Z-01A-21D-A25D-08	HNSC		17	7578290	7578290	C	T	NM_000546.6(TP53):c.560-1G>A	Pathogenic	germline/somatic
TP53	17	7577120	7577120	C	T	TCGA-CV-A460-01A-21D-A25D-08	HNSC		17	7577120	7577120	C	T	NM_000546.6(TP53):c.818G>A (p.Arg273His)	Pathogenic	germline/somatic
TP53	17	7577538	7577538	C	T	TCGA-CV-A464-01A-11D-A25Y-08	HNSC		17	7577538	7577538	C	T	NM_000546.6(TP53):c.743G>A (p.Arg248Gln)	Pathogenic	germline/somatic
TP53	17	7578406	7578406	C	T	TCGA-CV-A464-01A-11D-A25Y-08	HNSC		17	7578406	7578406	C	T	NM_000546.6(TP53):c.524G>A (p.Arg175His)	Pathogenic	germline/somatic
TP53	17	7579358	7579358	C	A	TCGA-CV-A465-01A-11D-A25Y-08	HNSC		17	7579358	7579358	C	A	NM_000546.6(TP53):c.329G>T (p.Arg110Leu)	Pathogenic/Likely pathogenic	germline/somatic
TP53	17	7574003	7574003	G	A	TCGA-CV-A468-01A-11D-A25Y-08	HNSC		17	7574003	7574003	G	A	NM_000546.6(TP53):c.1024C>T (p.Arg342Ter)	Pathogenic	germline/somatic
TP53	17	7577098	7577098	T	A	TCGA-CV-A6JE-01A-11D-A31L-08	HNSC		17	7577098	7577098	T	A	NM_000546.6(TP53):c.840A>T (p.Arg280Ser)	Pathogenic	somatic
TP53	17	7578190	7578190	T	C	TCGA-CV-A6JE-01A-11D-A31L-08	HNSC		17	7578190	7578190	T	C	NM_000546.6(TP53):c.659A>G (p.Tyr220Cys)	Pathogenic	germline/somatic
TP53	17	7574018	7574018	G	A	TCGA-CV-A6JT-01A-11D-A31L-08	HNSC		17	7574018	7574018	G	A	NM_000546.6(TP53):c.1009C>T (p.Arg337Cys)	Pathogenic/Likely pathogenic	germline/somatic
TP53	17	7577580	7577580	T	C	TCGA-CV-A6JT-01A-11D-A31L-08	HNSC		17	7577580	7577580	T	C	NM_000546.6(TP53):c.701A>G (p.Tyr234Cys)	Pathogenic/Likely pathogenic	germline/somatic
TP53	17	7578176	7578176	C	A	TCGA-CV-A6JU-01A-11D-A31L-08	HNSC		17	7578176	7578176	C	A	NM_000546.6(TP53):c.672+1G>T	Pathogenic/Likely pathogenic	germline/somatic
TP53	17	7578403	7578403	C	A	TCGA-CV-A6JZ-01A-11D-A31L-08	HNSC		17	7578403	7578403	C	A	NM_000546.6(TP53):c.527G>T (p.Cys176Phe)	Likely pathogenic	germline/somatic
TP53	17	7578176	7578176	C	A	TCGA-CV-A6K1-01A-11D-A31L-08	HNSC		17	7578176	7578176	C	A	NM_000546.6(TP53):c.672+1G>T	Pathogenic/Likely pathogenic	germline/somatic
TP53	17	7578212	7578212	G	A	TCGA-CX-7082-01A-11D-2012-08	HNSC		17	7578212	7578212	G	A	NM_000546.6(TP53):c.637C>T (p.Arg213Ter)	Pathogenic	germline/somatic
TP53	17	7577082	7577082	C	A	TCGA-CX-A4AQ-01A-11D-A25D-08	HNSC		17	7577082	7577082	C	A	NM_000546.6(TP53):c.856G>T (p.Glu286Ter)	Pathogenic	germline/somatic
TP53	17	7577559	7577559	G	C	TCGA-CZ-4865-01A-02D-1501-10	KIRC		17	7577559	7577559	G	C	NM_000546.6(TP53):c.722C>G (p.Ser241Cys)	Likely pathogenic	germline/somatic
TP53	17	7577124	7577124	C	T	TCGA-CZ-5463-01A-01D-1501-10	KIRC		17	7577124	7577124	C	T	NM_000546.6(TP53):c.814G>A (p.Val272Met)	Pathogenic	germline/somatic
TP53	17	7577097	7577097	C	A	TCGA-D1-A15V-01A-11D-A122-09	UCEC		17	7577097	7577097	C	A	NM_000546.6(TP53):c.841G>T (p.Asp281Tyr)	Pathogenic	germline/somatic
TP53	17	7578508	7578508	C	T	TCGA-D1-A169-01A-11D-A12J-09	UCEC		17	7578508	7578508	C	T	NM_000546.6(TP53):c.422G>A (p.Cys141Tyr)	Pathogenic	germline/somatic
TP53	17	7577538	7577538	C	T	TCGA-D1-A16G-01A-31D-A12J-09	UCEC		17	7577538	7577538	C	T	NM_000546.6(TP53):c.743G>A (p.Arg248Gln)	Pathogenic	germline/somatic
TP53	17	7574034	7574034	C	G	TCGA-D1-A16I-01A-11D-A12J-09	UCEC		17	7574034	7574034	C	G	NM_000546.6(TP53):c.994-1G>C	Pathogenic	germline
TP53	17	7577565	7577565	T	C	TCGA-D1-A16N-01A-11D-A12J-09	UCEC		17	7577565	7577565	T	C	NM_000546.6(TP53):c.716A>G (p.Asn239Ser)	Likely pathogenic	germline/somatic
TP53	17	7577551	7577551	C	T	TCGA-D1-A16S-01A-11D-A12J-09	UCEC		17	7577551	7577551	C	T	NM_000546.6(TP53):c.730G>A (p.Gly244Ser)	Pathogenic	germline/somatic
TP53	17	7578211	7578211	C	T	TCGA-D1-A16Y-01A-31D-A12J-09	UCEC		17	7578211	7578211	C	T	NM_000546.6(TP53):c.638G>A (p.Arg213Gln)	Pathogenic	germline/somatic
TP53	17	7578406	7578406	C	T	TCGA-D1-A1NU-01A-11D-A14G-09	UCEC		17	7578406	7578406	C	T	NM_000546.6(TP53):c.524G>A (p.Arg175His)	Pathogenic	germline/somatic
TP53	17	7577570	7577570	C	A	TCGA-D1-A1O0-01A-11D-A17D-09	UCEC		17	7577570	7577570	C	A	NM_000546.6(TP53):c.711G>T (p.Met237Ile)	Likely pathogenic	somatic
TP53	17	7577559	7577559	G	T	TCGA-D1-A3DH-01A-11D-A19Y-09	UCEC		17	7577559	7577559	G	T	NM_000546.6(TP53):c.722C>A (p.Ser241Tyr)	Pathogenic	germline/somatic
TP53	17	7578190	7578190	T	C	TCGA-D1-A3JP-01A-31D-A228-09	UCEC		17	7578190	7578190	T	C	NM_000546.6(TP53):c.659A>G (p.Tyr220Cys)	Pathogenic	germline/somatic
TP53	17	7577121	7577121	G	T	TCGA-D1-A3JQ-01A-11D-A228-09	UCEC		17	7577121	7577121	G	T	NM_000546.6(TP53):c.817C>A (p.Arg273Ser)	Pathogenic/Likely pathogenic	germline/somatic
TP53	17	7576855	7576855	G	A	TCGA-D3-A3C8-06A-12D-A19A-08	SKCM		17	7576855	7576855	G	A	NM_000546.6(TP53):c.991C>T (p.Gln331Ter)	Pathogenic	germline
TP53	17	7578263	7578263	G	A	TCGA-D3-A51G-06A-11D-A25O-08	SKCM		17	7578263	7578263	G	A	NM_000546.6(TP53):c.586C>T (p.Arg196Ter)	Pathogenic	germline/somatic
TP53	17	7578370	7578370	C	T	TCGA-D3-A51T-06A-11D-A25O-08	SKCM		17	7578370	7578370	C	T	NM_000546.6(TP53):c.559+1G>A	Pathogenic/Likely pathogenic	germline
TP53	17	7578406	7578406	C	T	TCGA-D3-A5GR-06A-11D-A27K-08	SKCM		17	7578406	7578406	C	T	NM_000546.6(TP53):c.524G>A (p.Arg175His)	Pathogenic	germline/somatic
TP53	17	7578208	7578208	T	C	TCGA-D5-5538-01A-01D-1650-10	COAD		17	7578208	7578208	T	C	NM_000546.6(TP53):c.641A>G (p.His214Arg)	Likely pathogenic	germline/somatic
TP53	17	7578406	7578406	C	T	TCGA-D5-5540-01A-01D-1650-10	COAD		17	7578406	7578406	C	T	NM_000546.6(TP53):c.524G>A (p.Arg175His)	Pathogenic	germline/somatic
TP53	17	7577120	7577120	C	T	TCGA-D5-5541-01A-01D-1650-10	COAD		17	7577120	7577120	C	T	NM_000546.6(TP53):c.818G>A (p.Arg273His)	Pathogenic	germline/somatic
TP53	17	7577120	7577120	C	T	TCGA-D5-6531-01A-11D-1719-10	COAD		17	7577120	7577120	C	T	NM_000546.6(TP53):c.818G>A (p.Arg273His)	Pathogenic	germline/somatic
TP53	17	7578406	7578406	C	T	TCGA-D5-6532-01A-11D-1719-10	COAD		17	7578406	7578406	C	T	NM_000546.6(TP53):c.524G>A (p.Arg175His)	Pathogenic	germline/somatic
TP53	17	7577539	7577539	G	A	TCGA-D5-6533-01A-11D-1719-10	COAD		17	7577539	7577539	G	A	NM_000546.6(TP53):c.742C>T (p.Arg248Trp)	Pathogenic	germline/somatic
TP53	17	7577094	7577094	G	A	TCGA-D5-6535-01A-11D-1719-10	COAD		17	7577094	7577094	G	A	NM_000546.6(TP53):c.844C>T (p.Arg282Trp)	Pathogenic/Likely pathogenic	germline/somatic
TP53	17	7577548	7577548	C	T	TCGA-D5-6538-01A-11D-1719-10	COAD		17	7577548	7577548	C	T	NM_000546.6(TP53):c.733G>A (p.Gly245Ser)	Pathogenic	germline/somatic
TP53	17	7578208	7578208	T	C	TCGA-D5-6539-01A-11D-1719-10	COAD		17	7578208	7578208	T	C	NM_000546.6(TP53):c.641A>G (p.His214Arg)	Likely pathogenic	germline/somatic
TP53	17	7577121	7577121	G	A	TCGA-D5-6540-01A-11D-1719-10	COAD		17	7577121	7577121	G	A	NM_000546.6(TP53):c.817C>T (p.Arg273Cys)	Pathogenic/Likely pathogenic	germline/somatic
TP53	17	7578406	7578406	C	T	TCGA-D5-6541-01A-11D-1719-10	COAD		17	7578406	7578406	C	T	NM_000546.6(TP53):c.524G>A (p.Arg175His)	Pathogenic	germline/somatic
TP53	17	7578442	7578442	T	C	TCGA-D5-6924-01A-11D-1924-10	COAD		17	7578442	7578442	T	C	NM_000546.6(TP53):c.488A>G (p.Tyr163Cys)	Pathogenic	germline/somatic
TP53	17	7577120	7577120	C	T	TCGA-D5-6926-01A-11D-1924-10	COAD		17	7577120	7577120	C	T	NM_000546.6(TP53):c.818G>A (p.Arg273His)	Pathogenic	germline/somatic
TP53	17	7574017	7574017	C	A	TCGA-D5-6929-01A-31D-1924-10	COAD		17	7574017	7574017	C	A	NM_000546.6(TP53):c.1010G>T (p.Arg337Leu)	Likely pathogenic	germline/somatic
TP53	17	7578388	7578388	C	T	TCGA-D5-6931-01A-11D-1924-10	COAD		17	7578388	7578388	C	T	NM_000546.6(TP53):c.542G>A (p.Arg181His)	Pathogenic/Likely pathogenic	germline/somatic
TP53	17	7577114	7577114	C	T	TCGA-D5-6932-01A-11D-1924-10	COAD		17	7577114	7577114	C	T	NM_000546.6(TP53):c.824G>A (p.Cys275Tyr)	Pathogenic/Likely pathogenic	germline/somatic
TP53	17	7577120	7577120	C	T	TCGA-D6-6515-01A-21D-1870-08	HNSC		17	7577120	7577120	C	T	NM_000546.6(TP53):c.818G>A (p.Arg273His)	Pathogenic	germline/somatic
TP53	17	7578406	7578406	C	T	TCGA-D6-6517-01A-11D-1870-08	HNSC		17	7578406	7578406	C	T	NM_000546.6(TP53):c.524G>A (p.Arg175His)	Pathogenic	germline/somatic
TP53	17	7578442	7578442	T	C	TCGA-D6-A4Z9-01A-11D-A25D-08	HNSC		17	7578442	7578442	T	C	NM_000546.6(TP53):c.488A>G (p.Tyr163Cys)	Pathogenic	germline/somatic
TP53	17	7574018	7574018	G	A	TCGA-D6-A6EQ-01A-11D-A31L-08	HNSC		17	7574018	7574018	G	A	NM_000546.6(TP53):c.1009C>T (p.Arg337Cys)	Pathogenic/Likely pathogenic	germline/somatic
TP53	17	7579485	7579485	C	A	TCGA-D6-A74Q-01A-11D-A34J-08	HNSC		17	7579485	7579485	C	A	NM_000546.6(TP53):c.202G>T (p.Glu68Ter)	Pathogenic	germline
TP53	17	7578407	7578407	G	C	TCGA-D7-6518-01A-11D-1800-08	STAD		17	7578407	7578407	G	C	NM_000546.6(TP53):c.523C>G (p.Arg175Gly)	Pathogenic	germline/somatic
TP53	17	7578406	7578406	C	T	TCGA-D7-6520-01A-11D-1800-08	STAD		17	7578406	7578406	C	T	NM_000546.6(TP53):c.524G>A (p.Arg175His)	Pathogenic	germline/somatic
TP53	17	7578212	7578212	G	A	TCGA-D7-6525-01A-11D-1800-08	STAD		17	7578212	7578212	G	A	NM_000546.6(TP53):c.637C>T (p.Arg213Ter)	Pathogenic	germline/somatic
TP53	17	7577120	7577120	C	T	TCGA-D7-6528-01A-11D-1800-08	STAD		17	7577120	7577120	C	T	NM_000546.6(TP53):c.818G>A (p.Arg273His)	Pathogenic	germline/somatic
TP53	17	7578406	7578406	C	T	TCGA-D7-6815-01A-11D-1882-08	STAD		17	7578406	7578406	C	T	NM_000546.6(TP53):c.524G>A (p.Arg175His)	Pathogenic	germline/somatic
TP53	17	7577120	7577120	C	T	TCGA-D7-6817-01A-11D-1882-08	STAD		17	7577120	7577120	C	T	NM_000546.6(TP53):c.818G>A (p.Arg273His)	Pathogenic	germline/somatic
TP53	17	7577570	7577570	C	T	TCGA-D7-6820-01A-11D-1882-08	STAD		17	7577570	7577570	C	T	NM_000546.6(TP53):c.711G>A (p.Met237Ile)	Pathogenic	germline/somatic
TP53	17	7577121	7577121	G	A	TCGA-D7-8576-01A-11D-2340-08	STAD		17	7577121	7577121	G	A	NM_000546.6(TP53):c.817C>T (p.Arg273Cys)	Pathogenic/Likely pathogenic	germline/somatic
TP53	17	7577121	7577121	G	T	TCGA-D7-8578-01A-21D-2340-08	STAD		17	7577121	7577121	G	T	NM_000546.6(TP53):c.817C>A (p.Arg273Ser)	Pathogenic/Likely pathogenic	germline/somatic
TP53	17	7578275	7578275	G	A	TCGA-D7-A4YU-01A-21D-A25D-08	STAD		17	7578275	7578275	G	A	NM_000546.6(TP53):c.574C>T (p.Gln192Ter)	Pathogenic	germline
TP53	17	7578406	7578406	C	T	TCGA-D7-A6EX-01A-11D-A31L-08	STAD		17	7578406	7578406	C	T	NM_000546.6(TP53):c.524G>A (p.Arg175His)	Pathogenic	germline/somatic
TP53	17	7577121	7577121	G	A	TCGA-D7-A6F0-01A-11D-A31L-08	STAD		17	7577121	7577121	G	A	NM_000546.6(TP53):c.817C>T (p.Arg273Cys)	Pathogenic/Likely pathogenic	germline/somatic
TP53	17	7577570	7577570	C	T	TCGA-D7-A6F2-01A-12D-A31L-08	STAD		17	7577570	7577570	C	T	NM_000546.6(TP53):c.711G>A (p.Met237Ile)	Pathogenic	germline/somatic
TP53	17	7578508	7578508	C	T	TCGA-D8-A13Z-01A-11D-A10Y-09	BRCA		17	7578508	7578508	C	T	NM_000546.6(TP53):c.422G>A (p.Cys141Tyr)	Pathogenic	germline/somatic
TP53	17	7578403	7578403	C	A	TCGA-D8-A147-01A-11D-A10Y-09	BRCA		17	7578403	7578403	C	A	NM_000546.6(TP53):c.527G>T (p.Cys176Phe)	Likely pathogenic	germline/somatic
TP53	17	7578413	7578413	C	A	TCGA-D8-A1J9-01A-11D-A13L-09	BRCA		17	7578413	7578413	C	A	NM_000546.6(TP53):c.517G>T (p.Val173Leu)	Pathogenic	germline/somatic
TP53	17	7578508	7578508	C	T	TCGA-D8-A1JJ-01A-31D-A14K-09	BRCA		17	7578508	7578508	C	T	NM_000546.6(TP53):c.422G>A (p.Cys141Tyr)	Pathogenic	germline/somatic
TP53	17	7576852	7576852	C	T	TCGA-D8-A1JK-01A-11D-A13L-09	BRCA		17	7576852	7576852	C	T	NM_000546.6(TP53):c.993+1G>A	Pathogenic	germline/somatic
TP53	17	7577120	7577120	C	T	TCGA-D8-A1JM-01A-11D-A13L-09	BRCA		17	7577120	7577120	C	T	NM_000546.6(TP53):c.818G>A (p.Arg273His)	Pathogenic	germline/somatic
TP53	17	7577568	7577568	C	A	TCGA-D8-A1X5-01A-11D-A14G-09	BRCA		17	7577568	7577568	C	A	NM_000546.6(TP53):c.713G>T (p.Cys238Phe)	Pathogenic	germline/somatic
TP53	17	7577022	7577022	G	A	TCGA-D8-A1XA-01A-11D-A14G-09	BRCA		17	7577022	7577022	G	A	NM_000546.6(TP53):c.916C>T (p.Arg306Ter)	Pathogenic	germline/somatic
TP53	17	7577539	7577539	G	A	TCGA-D8-A1XL-01A-11D-A14K-09	BRCA		17	7577539	7577539	G	A	NM_000546.6(TP53):c.742C>T (p.Arg248Trp)	Pathogenic	germline/somatic
TP53	17	7578431	7578431	G	A	TCGA-D8-A1XZ-01A-11D-A14K-09	BRCA		17	7578431	7578431	G	A	NM_000546.6(TP53):c.499C>T (p.Gln167Ter)	Pathogenic/Likely pathogenic	germline
TP53	17	7578212	7578212	G	A	TCGA-D8-A1Y3-01A-11D-A159-09	BRCA		17	7578212	7578212	G	A	NM_000546.6(TP53):c.637C>T (p.Arg213Ter)	Pathogenic	germline/somatic
TP53	17	7578263	7578263	G	A	TCGA-D8-A27M-01A-11D-A16D-09	BRCA		17	7578263	7578263	G	A	NM_000546.6(TP53):c.586C>T (p.Arg196Ter)	Pathogenic	germline/somatic
TP53	17	7578406	7578406	C	T	TCGA-D8-A27N-01A-11D-A16D-09	BRCA		17	7578406	7578406	C	T	NM_000546.6(TP53):c.524G>A (p.Arg175His)	Pathogenic	germline/somatic
TP53	17	7578212	7578212	G	A	TCGA-D9-A6EC-06A-11D-A30X-08	SKCM		17	7578212	7578212	G	A	NM_000546.6(TP53):c.637C>T (p.Arg213Ter)	Pathogenic	germline/somatic
TP53	17	7578291	7578291	T	G	TCGA-D9-A6EC-06A-11D-A30X-08	SKCM		17	7578291	7578291	T	G	NM_000546.6(TP53):c.560-2A>C	Pathogenic	germline/somatic
TP53	17	7577082	7577082	C	T	TCGA-DA-A1I5-06A-11D-A197-08	SKCM		17	7577082	7577082	C	T	NM_000546.6(TP53):c.856G>A (p.Glu286Lys)	Pathogenic	germline/somatic
TP53	17	7578263	7578263	G	A	TCGA-DA-A1I5-06A-11D-A197-08	SKCM		17	7578263	7578263	G	A	NM_000546.6(TP53):c.586C>T (p.Arg196Ter)	Pathogenic	germline/somatic
TP53	17	7577580	7577580	T	C	TCGA-DB-5270-01A-02D-1468-08	LGG		17	7577580	7577580	T	C	NM_000546.6(TP53):c.701A>G (p.Tyr234Cys)	Pathogenic/Likely pathogenic	germline/somatic
TP53	17	7578479	7578479	G	A	TCGA-DB-5270-01A-02D-1468-08	LGG		17	7578479	7578479	G	A	NM_000546.6(TP53):c.451C>T (p.Pro151Ser)	Pathogenic/Likely pathogenic	germline/somatic
TP53	17	7577120	7577120	C	T	TCGA-DB-5273-01A-01D-1468-08	LGG		17	7577120	7577120	C	T	NM_000546.6(TP53):c.818G>A (p.Arg273His)	Pathogenic	germline/somatic
TP53	17	7577547	7577547	C	T	TCGA-DB-5276-01A-01D-1468-08	LGG		17	7577547	7577547	C	T	NM_000546.6(TP53):c.734G>A (p.Gly245Asp)	Pathogenic/Likely pathogenic	germline/somatic
TP53	17	7577120	7577120	C	T	TCGA-DB-5280-01A-01D-1468-08	LGG		17	7577120	7577120	C	T	NM_000546.6(TP53):c.818G>A (p.Arg273His)	Pathogenic	germline/somatic
TP53	17	7577538	7577538	C	T	TCGA-DB-5281-01A-01D-1468-08	LGG		17	7577538	7577538	C	T	NM_000546.6(TP53):c.743G>A (p.Arg248Gln)	Pathogenic	germline/somatic
TP53	17	7577538	7577538	C	T	TCGA-DB-A4XB-01A-11D-A26M-08	LGG		17	7577538	7577538	C	T	NM_000546.6(TP53):c.743G>A (p.Arg248Gln)	Pathogenic	germline/somatic
TP53	17	7578190	7578190	T	C	TCGA-DB-A4XD-01A-11D-A27K-08	LGG		17	7578190	7578190	T	C	NM_000546.6(TP53):c.659A>G (p.Tyr220Cys)	Pathogenic	germline/somatic
TP53	17	7578508	7578508	C	T	TCGA-DB-A4XD-01A-11D-A27K-08	LGG		17	7578508	7578508	C	T	NM_000546.6(TP53):c.422G>A (p.Cys141Tyr)	Pathogenic	germline/somatic
TP53	17	7577559	7577559	G	T	TCGA-DB-A4XE-01A-11D-A27K-08	LGG		17	7577559	7577559	G	T	NM_000546.6(TP53):c.722C>A (p.Ser241Tyr)	Pathogenic	germline/somatic
TP53	17	7578271	7578271	T	C	TCGA-DB-A4XF-01A-11D-A27K-08	LGG		17	7578271	7578271	T	C	NM_000546.6(TP53):c.578A>G (p.His193Arg)	Pathogenic/Likely pathogenic	germline/somatic
TP53	17	7577121	7577121	G	A	TCGA-DB-A64X-01A-11D-A29Q-08	LGG		17	7577121	7577121	G	A	NM_000546.6(TP53):c.817C>T (p.Arg273Cys)	Pathogenic/Likely pathogenic	germline/somatic
TP53	17	7577114	7577114	C	A	TCGA-DB-A75M-01A-11D-A32B-08	LGG		17	7577114	7577114	C	A	NM_000546.6(TP53):c.824G>T (p.Cys275Phe)	Likely pathogenic	somatic
TP53	17	7578392	7578392	C	A	TCGA-DC-4745-01A-01D-1733-10	READ		17	7578392	7578392	C	A	NM_000546.6(TP53):c.538G>T (p.Glu180Ter)	Pathogenic	somatic
TP53	17	7578265	7578265	A	G	TCGA-DC-4749-01A-01D-1733-10	READ		17	7578265	7578265	A	G	NM_000546.6(TP53):c.584T>C (p.Ile195Thr)	Pathogenic	germline/somatic
TP53	17	7578263	7578263	G	A	TCGA-DC-6154-01A-31D-1924-10	READ		17	7578263	7578263	G	A	NM_000546.6(TP53):c.586C>T (p.Arg196Ter)	Pathogenic	germline/somatic
TP53	17	7578479	7578479	G	A	TCGA-DC-6157-01A-11D-1657-10	READ		17	7578479	7578479	G	A	NM_000546.6(TP53):c.451C>T (p.Pro151Ser)	Pathogenic/Likely pathogenic	germline/somatic
TP53	17	7577094	7577094	G	A	TCGA-DC-6158-01A-11D-1657-10	READ		17	7577094	7577094	G	A	NM_000546.6(TP53):c.844C>T (p.Arg282Trp)	Pathogenic/Likely pathogenic	germline/somatic
TP53	17	7577548	7577548	C	T	TCGA-DC-6682-01A-11D-1826-10	READ		17	7577548	7577548	C	T	NM_000546.6(TP53):c.733G>A (p.Gly245Ser)	Pathogenic	germline/somatic
TP53	17	7577568	7577568	C	T	TCGA-DC-6683-01A-11D-1826-10	READ		17	7577568	7577568	C	T	NM_000546.6(TP53):c.713G>A (p.Cys238Tyr)	Pathogenic/Likely pathogenic	germline/somatic
TP53	17	7577107	7577107	A	T	TCGA-DD-A1EE-01A-11D-A12Z-10	LIHC		17	7577107	7577107	A	T	NM_000546.6(TP53):c.831T>A (p.Cys277Ter)	Pathogenic	germline
TP53	17	7578271	7578271	T	C	TCGA-DD-A1EE-01A-11D-A12Z-10	LIHC		17	7578271	7578271	T	C	NM_000546.6(TP53):c.578A>G (p.His193Arg)	Pathogenic/Likely pathogenic	germline/somatic
TP53	17	7578419	7578419	C	A	TCGA-DD-A1EI-01A-11D-A12Z-10	LIHC		17	7578419	7578419	C	A	NM_000546.6(TP53):c.511G>T (p.Glu171Ter)	Pathogenic	germline/somatic
TP53	17	7578275	7578275	G	A	TCGA-DD-AACG-01A-11D-A40R-10	LIHC		17	7578275	7578275	G	A	NM_000546.6(TP53):c.574C>T (p.Gln192Ter)	Pathogenic	germline
TP53	17	7577569	7577569	A	G	TCGA-DD-AACL-01A-11D-A40R-10	LIHC		17	7577569	7577569	A	G	NM_000546.6(TP53):c.712T>C (p.Cys238Arg)	Pathogenic	germline/somatic
TP53	17	7577545	7577545	T	C	TCGA-DD-AACU-01A-11D-A40R-10	LIHC		17	7577545	7577545	T	C	NM_000546.6(TP53):c.736A>G (p.Met246Val)	Pathogenic	germline/somatic
TP53	17	7578500	7578500	G	A	TCGA-DD-AACV-01A-11D-A40R-10	LIHC		17	7578500	7578500	G	A	NM_000546.6(TP53):c.430C>T (p.Gln144Ter)	Pathogenic	germline/somatic
TP53	17	7577121	7577121	G	T	TCGA-DD-AADB-01A-11D-A40R-10	LIHC		17	7577121	7577121	G	T	NM_000546.6(TP53):c.817C>A (p.Arg273Ser)	Pathogenic/Likely pathogenic	germline/somatic
TP53	17	7578555	7578555	C	T	TCGA-DD-AADC-01A-11D-A40R-10	LIHC		17	7578555	7578555	C	T	NM_000546.6(TP53):c.376-1G>A	Pathogenic/Likely pathogenic	germline/somatic
TP53	17	7578190	7578190	T	C	TCGA-DD-AADD-01A-11D-A40R-10	LIHC		17	7578190	7578190	T	C	NM_000546.6(TP53):c.659A>G (p.Tyr220Cys)	Pathogenic	germline/somatic
TP53	17	7578235	7578235	T	C	TCGA-DD-AADL-01A-11D-A40R-10	LIHC		17	7578235	7578235	T	C	NM_000546.6(TP53):c.614A>G (p.Tyr205Cys)	Likely pathogenic	germline/somatic
TP53	17	7577022	7577022	G	A	TCGA-DD-AADR-01A-11D-A40R-10	LIHC		17	7577022	7577022	G	A	NM_000546.6(TP53):c.916C>T (p.Arg306Ter)	Pathogenic	germline/somatic
TP53	17	7578555	7578555	C	T	TCGA-DD-AAED-01A-12D-A40R-10	LIHC		17	7578555	7578555	C	T	NM_000546.6(TP53):c.376-1G>A	Pathogenic/Likely pathogenic	germline/somatic
TP53	17	7578271	7578271	T	C	TCGA-DF-A2KR-01A-11D-A17W-09	UCEC		17	7578271	7578271	T	C	NM_000546.6(TP53):c.578A>G (p.His193Arg)	Pathogenic/Likely pathogenic	germline/somatic
TP53	17	7577548	7577548	C	T	TCGA-DF-A2KS-01A-11D-A18P-09	UCEC		17	7577548	7577548	C	T	NM_000546.6(TP53):c.733G>A (p.Gly245Ser)	Pathogenic	germline/somatic
TP53	17	7578212	7578212	G	A	TCGA-DF-A2KV-01A-11D-A17W-09	UCEC		17	7578212	7578212	G	A	NM_000546.6(TP53):c.637C>T (p.Arg213Ter)	Pathogenic	germline/somatic
TP53	17	7578205	7578205	C	A	TCGA-DF-A2L0-01A-11D-A17W-09	UCEC		17	7578205	7578205	C	A	NM_000546.6(TP53):c.644G>T (p.Ser215Ile)	Pathogenic	germline/somatic
TP53	17	7577085	7577085	C	T	TCGA-DG-A2KK-01A-11D-A17W-09	CESC		17	7577085	7577085	C	T	NM_000546.6(TP53):c.853G>A (p.Glu285Lys)	Pathogenic/Likely pathogenic	germline/somatic
TP53	17	7578271	7578271	T	C	TCGA-DH-5142-01A-01D-1468-08	LGG		17	7578271	7578271	T	C	NM_000546.6(TP53):c.578A>G (p.His193Arg)	Pathogenic/Likely pathogenic	germline/somatic
TP53	17	7577538	7577538	C	T	TCGA-DH-5143-01A-01D-1468-08	LGG		17	7577538	7577538	C	T	NM_000546.6(TP53):c.743G>A (p.Arg248Gln)	Pathogenic	germline/somatic
TP53	17	7578407	7578407	G	C	TCGA-DH-A66D-01A-11D-A31L-08	LGG		17	7578407	7578407	G	C	NM_000546.6(TP53):c.523C>G (p.Arg175Gly)	Pathogenic	germline/somatic
TP53	17	7578395	7578395	G	C	TCGA-DH-A66G-01A-21D-A31L-08	LGG		17	7578395	7578395	G	C	NM_000546.6(TP53):c.535C>G (p.His179Asp)	Likely pathogenic	somatic
TP53	17	7578534	7578534	C	G	TCGA-DH-A7UT-01A-12D-A34A-08	LGG		17	7578534	7578534	C	G	NM_000546.6(TP53):c.396G>C (p.Lys132Asn)	Likely pathogenic	germline/somatic
TP53	17	7577120	7577120	C	A	TCGA-DH-A7UU-01A-12D-A34A-08	LGG		17	7577120	7577120	C	A	NM_000546.6(TP53):c.818G>T (p.Arg273Leu)	Pathogenic	germline/somatic
TP53	17	7577121	7577121	G	A	TCGA-DH-A7UV-01A-12D-A34A-08	LGG		17	7577121	7577121	G	A	NM_000546.6(TP53):c.817C>T (p.Arg273Cys)	Pathogenic/Likely pathogenic	germline/somatic
TP53	17	7578500	7578500	G	A	TCGA-DI-A1NN-01A-11D-A16D-09	UCEC		17	7578500	7578500	G	A	NM_000546.6(TP53):c.430C>T (p.Gln144Ter)	Pathogenic	germline/somatic
TP53	17	7577111	7577111	G	C	TCGA-DI-A2QY-01A-12D-A19Y-09	UCEC		17	7577111	7577111	G	C	NM_000546.6(TP53):c.827C>G (p.Ala276Gly)	Pathogenic	germline
TP53	17	7578275	7578275	G	A	TCGA-DK-A1A3-01A-11D-A13W-08	BLCA		17	7578275	7578275	G	A	NM_000546.6(TP53):c.574C>T (p.Gln192Ter)	Pathogenic	germline
TP53	17	7577085	7577085	C	T	TCGA-DK-A1AB-01A-11D-A13W-08	BLCA		17	7577085	7577085	C	T	NM_000546.6(TP53):c.853G>A (p.Glu285Lys)	Pathogenic/Likely pathogenic	germline/somatic
TP53	17	7578188	7578188	C	A	TCGA-DK-A1AB-01A-11D-A13W-08	BLCA		17	7578188	7578188	C	A	NM_000546.6(TP53):c.661G>T (p.Glu221Ter)	Pathogenic	germline/somatic
TP53	17	7578475	7578475	G	A	TCGA-DK-A1AD-01A-11D-A13W-08	BLCA		17	7578475	7578475	G	A	NM_000546.6(TP53):c.455C>T (p.Pro152Leu)	Pathogenic	germline/somatic
TP53	17	7578275	7578275	G	A	TCGA-DK-A2I1-01A-11D-A17V-08	BLCA		17	7578275	7578275	G	A	NM_000546.6(TP53):c.574C>T (p.Gln192Ter)	Pathogenic	germline
TP53	17	7577539	7577539	G	A	TCGA-DK-A2I2-01A-11D-A17V-08	BLCA		17	7577539	7577539	G	A	NM_000546.6(TP53):c.742C>T (p.Arg248Trp)	Pathogenic	germline/somatic
TP53	17	7578500	7578500	G	A	TCGA-DK-A2I6-01A-12D-A18F-08	BLCA		17	7578500	7578500	G	A	NM_000546.6(TP53):c.430C>T (p.Gln144Ter)	Pathogenic	germline/somatic
TP53	17	7577538	7577538	C	T	TCGA-DK-A3IK-01A-32D-A21A-08	BLCA		17	7577538	7577538	C	T	NM_000546.6(TP53):c.743G>A (p.Arg248Gln)	Pathogenic	germline/somatic
TP53	17	7577538	7577538	C	T	TCGA-DK-A3IL-01A-11D-A20D-08	BLCA		17	7577538	7577538	C	T	NM_000546.6(TP53):c.743G>A (p.Arg248Gln)	Pathogenic	germline/somatic
TP53	17	7577121	7577121	G	A	TCGA-DK-A3IM-01A-11D-A20D-08	BLCA		17	7577121	7577121	G	A	NM_000546.6(TP53):c.817C>T (p.Arg273Cys)	Pathogenic/Likely pathogenic	germline/somatic
TP53	17	7578534	7578534	C	G	TCGA-DK-A3IN-01A-11D-A20D-08	BLCA		17	7578534	7578534	C	G	NM_000546.6(TP53):c.396G>C (p.Lys132Asn)	Likely pathogenic	germline/somatic
TP53	17	7577085	7577085	C	T	TCGA-DK-A3IU-01A-11D-A20D-08	BLCA		17	7577085	7577085	C	T	NM_000546.6(TP53):c.853G>A (p.Glu285Lys)	Pathogenic/Likely pathogenic	germline/somatic
TP53	17	7577085	7577085	C	T	TCGA-DK-A3IV-01A-22D-A21A-08	BLCA		17	7577085	7577085	C	T	NM_000546.6(TP53):c.853G>A (p.Glu285Lys)	Pathogenic/Likely pathogenic	germline/somatic
TP53	17	7577121	7577121	G	A	TCGA-DK-A3X2-01A-11D-A22Z-08	BLCA		17	7577121	7577121	G	A	NM_000546.6(TP53):c.817C>T (p.Arg273Cys)	Pathogenic/Likely pathogenic	germline/somatic
TP53	17	7576855	7576855	G	A	TCGA-DK-A6B6-01A-11D-A30E-08	BLCA		17	7576855	7576855	G	A	NM_000546.6(TP53):c.991C>T (p.Gln331Ter)	Pathogenic	germline
TP53	17	7577547	7577547	C	A	TCGA-DK-AA6L-01A-11D-A391-08	BLCA		17	7577547	7577547	C	A	NM_000546.6(TP53):c.734G>T (p.Gly245Val)	Pathogenic	germline/somatic
TP53	17	7577547	7577547	C	T	TCGA-DK-AA6M-01A-11D-A391-08	BLCA		17	7577547	7577547	C	T	NM_000546.6(TP53):c.734G>A (p.Gly245Asp)	Pathogenic/Likely pathogenic	germline/somatic
TP53	17	7577538	7577538	C	T	TCGA-DK-AA6Q-01A-11D-A391-08	BLCA		17	7577538	7577538	C	T	NM_000546.6(TP53):c.743G>A (p.Arg248Gln)	Pathogenic	germline/somatic
TP53	17	7577538	7577538	C	T	TCGA-DK-AA6R-01A-11D-A42E-08	BLCA		17	7577538	7577538	C	T	NM_000546.6(TP53):c.743G>A (p.Arg248Gln)	Pathogenic	germline/somatic
TP53	17	7577506	7577506	C	A	TCGA-DK-AA6X-01A-12D-A42E-08	BLCA		17	7577506	7577506	C	A	NM_000546.6(TP53):c.775G>T (p.Asp259Tyr)	Likely pathogenic	somatic
TP53	17	7576852	7576852	C	A	TCGA-DK-AA77-01A-11D-A391-08	BLCA		17	7576852	7576852	C	A	NM_000546.6(TP53):c.993+1G>T	Pathogenic	germline/somatic
TP53	17	7578403	7578403	C	A	TCGA-DM-A0XF-01A-11D-A152-10	COAD		17	7578403	7578403	C	A	NM_000546.6(TP53):c.527G>T (p.Cys176Phe)	Likely pathogenic	germline/somatic
TP53	17	7578406	7578406	C	T	TCGA-DM-A0XF-01A-11D-A152-10	COAD		17	7578406	7578406	C	T	NM_000546.6(TP53):c.524G>A (p.Arg175His)	Pathogenic	germline/somatic
TP53	17	7577017	7577017	A	C	TCGA-DM-A1D0-01A-11D-A152-10	COAD		17	7577017	7577017	A	C	NM_000546.6(TP53):c.919+2T>G	Pathogenic/Likely pathogenic	germline/somatic
TP53	17	7577538	7577538	C	T	TCGA-DM-A1D4-01A-21D-A152-10	COAD		17	7577538	7577538	C	T	NM_000546.6(TP53):c.743G>A (p.Arg248Gln)	Pathogenic	germline/somatic
TP53	17	7577094	7577094	G	A	TCGA-DM-A1D6-01A-21D-A152-10	COAD		17	7577094	7577094	G	A	NM_000546.6(TP53):c.844C>T (p.Arg282Trp)	Pathogenic/Likely pathogenic	germline/somatic
TP53	17	7577538	7577538	C	T	TCGA-DM-A1D7-01A-11D-A152-10	COAD		17	7577538	7577538	C	T	NM_000546.6(TP53):c.743G>A (p.Arg248Gln)	Pathogenic	germline/somatic
TP53	17	7578406	7578406	C	T	TCGA-DM-A1D8-01A-11D-A152-10	COAD		17	7578406	7578406	C	T	NM_000546.6(TP53):c.524G>A (p.Arg175His)	Pathogenic	germline/somatic
TP53	17	7578406	7578406	C	T	TCGA-DM-A1D9-01A-11D-A152-10	COAD		17	7578406	7578406	C	T	NM_000546.6(TP53):c.524G>A (p.Arg175His)	Pathogenic	germline/somatic
TP53	17	7578280	7578280	G	A	TCGA-DM-A1DA-01A-11D-A152-10	COAD		17	7578280	7578280	G	A	NM_000546.6(TP53):c.569C>T (p.Pro190Leu)	Likely pathogenic	germline
TP53	17	7577538	7577538	C	T	TCGA-DM-A1DB-01A-11D-A152-10	COAD		17	7577538	7577538	C	T	NM_000546.6(TP53):c.743G>A (p.Arg248Gln)	Pathogenic	germline/somatic
TP53	17	7577539	7577539	G	A	TCGA-DM-A1HA-01A-11D-A152-10	COAD		17	7577539	7577539	G	A	NM_000546.6(TP53):c.742C>T (p.Arg248Trp)	Pathogenic	germline/somatic
TP53	17	7576852	7576852	C	T	TCGA-DM-A285-01A-11D-A16V-10	COAD		17	7576852	7576852	C	T	NM_000546.6(TP53):c.993+1G>A	Pathogenic	germline/somatic
TP53	17	7577085	7577085	C	T	TCGA-DM-A28E-01A-11D-A16V-10	COAD		17	7577085	7577085	C	T	NM_000546.6(TP53):c.853G>A (p.Glu285Lys)	Pathogenic/Likely pathogenic	germline/somatic
TP53	17	7578190	7578190	T	C	TCGA-DM-A28F-01A-11D-A16V-10	COAD		17	7578190	7578190	T	C	NM_000546.6(TP53):c.659A>G (p.Tyr220Cys)	Pathogenic	germline/somatic
TP53	17	7578406	7578406	C	T	TCGA-DM-A28H-01A-11D-A16V-10	COAD		17	7578406	7578406	C	T	NM_000546.6(TP53):c.524G>A (p.Arg175His)	Pathogenic	germline/somatic
TP53	17	7577548	7577548	C	T	TCGA-DQ-5631-01A-01D-1870-08	HNSC		17	7577548	7577548	C	T	NM_000546.6(TP53):c.733G>A (p.Gly245Ser)	Pathogenic	germline/somatic
TP53	17	7577121	7577121	G	A	TCGA-DU-5851-01A-13D-1893-08	LGG		17	7577121	7577121	G	A	NM_000546.6(TP53):c.817C>T (p.Arg273Cys)	Pathogenic/Likely pathogenic	germline/somatic
TP53	17	7577121	7577121	G	A	TCGA-DU-5853-01A-11D-1893-08	LGG		17	7577121	7577121	G	A	NM_000546.6(TP53):c.817C>T (p.Arg273Cys)	Pathogenic/Likely pathogenic	germline/somatic
TP53	17	7577121	7577121	G	A	TCGA-DU-5855-01A-11D-1705-08	LGG		17	7577121	7577121	G	A	NM_000546.6(TP53):c.817C>T (p.Arg273Cys)	Pathogenic/Likely pathogenic	germline/somatic
TP53	17	7577121	7577121	G	A	TCGA-DU-5871-01A-12D-1705-08	LGG		17	7577121	7577121	G	A	NM_000546.6(TP53):c.817C>T (p.Arg273Cys)	Pathogenic/Likely pathogenic	germline/somatic
TP53	17	7577139	7577139	G	A	TCGA-DU-6392-01A-11D-1705-08	LGG		17	7577139	7577139	G	A	NM_000546.6(TP53):c.799C>T (p.Arg267Trp)	Pathogenic/Likely pathogenic	germline/somatic
TP53	17	7579362	7579362	A	C	TCGA-DU-6395-01A-12D-1705-08	LGG		17	7579362	7579362	A	C	NM_000546.6(TP53):c.325T>G (p.Phe109Val)	Likely pathogenic	germline
TP53	17	7577121	7577121	G	A	TCGA-DU-6396-01A-11D-1705-08	LGG		17	7577121	7577121	G	A	NM_000546.6(TP53):c.817C>T (p.Arg273Cys)	Pathogenic/Likely pathogenic	germline/somatic
TP53	17	7574018	7574018	G	A	TCGA-DU-6401-01A-11D-1705-08	LGG		17	7574018	7574018	G	A	NM_000546.6(TP53):c.1009C>T (p.Arg337Cys)	Pathogenic/Likely pathogenic	germline/somatic
TP53	17	7579362	7579362	A	C	TCGA-DU-6407-01A-13D-1705-08	LGG		17	7579362	7579362	A	C	NM_000546.6(TP53):c.325T>G (p.Phe109Val)	Likely pathogenic	germline
TP53	17	7577121	7577121	G	A	TCGA-DU-6408-01A-11D-1705-08	LGG		17	7577121	7577121	G	A	NM_000546.6(TP53):c.817C>T (p.Arg273Cys)	Pathogenic/Likely pathogenic	germline/somatic
TP53	17	7578190	7578190	T	C	TCGA-DU-6542-01A-11D-1893-08	LGG		17	7578190	7578190	T	C	NM_000546.6(TP53):c.659A>G (p.Tyr220Cys)	Pathogenic	germline/somatic
TP53	17	7579311	7579311	C	G	TCGA-DU-7007-01A-11D-2024-08	LGG		17	7579311	7579311	C	G	NM_000546.6(TP53):c.375+1G>C	Likely pathogenic	germline
TP53	17	7577129	7577129	A	G	TCGA-DU-7008-01A-11D-2024-08	LGG		17	7577129	7577129	A	G	NM_000546.6(TP53):c.809T>C (p.Phe270Ser)	Pathogenic/Likely pathogenic	germline/somatic
TP53	17	7577094	7577094	G	A	TCGA-DU-7011-01A-11D-2024-08	LGG		17	7577094	7577094	G	A	NM_000546.6(TP53):c.844C>T (p.Arg282Trp)	Pathogenic/Likely pathogenic	germline/somatic
TP53	17	7578265	7578265	A	G	TCGA-DU-7015-01A-11D-2024-08	LGG		17	7578265	7578265	A	G	NM_000546.6(TP53):c.584T>C (p.Ile195Thr)	Pathogenic	germline/somatic
TP53	17	7578406	7578406	C	T	TCGA-DU-7019-01A-11D-2024-08	LGG		17	7578406	7578406	C	T	NM_000546.6(TP53):c.524G>A (p.Arg175His)	Pathogenic	germline/somatic
TP53	17	7578271	7578271	T	G	TCGA-DU-7298-01A-11D-2024-08	LGG		17	7578271	7578271	T	G	NM_000546.6(TP53):c.578A>C (p.His193Pro)	Pathogenic	germline/somatic
TP53	17	7577094	7577094	G	A	TCGA-DU-7300-01A-21D-2086-08	LGG		17	7577094	7577094	G	A	NM_000546.6(TP53):c.844C>T (p.Arg282Trp)	Pathogenic/Likely pathogenic	germline/somatic
TP53	17	7577121	7577121	G	A	TCGA-DU-7304-01A-12D-2086-08	LGG		17	7577121	7577121	G	A	NM_000546.6(TP53):c.817C>T (p.Arg273Cys)	Pathogenic/Likely pathogenic	germline/somatic
TP53	17	7577538	7577538	C	T	TCGA-DU-7306-01A-11D-2086-08	LGG		17	7577538	7577538	C	T	NM_000546.6(TP53):c.743G>A (p.Arg248Gln)	Pathogenic	germline/somatic
TP53	17	7577538	7577538	C	T	TCGA-DU-7309-01A-11D-2086-08	LGG		17	7577538	7577538	C	T	NM_000546.6(TP53):c.743G>A (p.Arg248Gln)	Pathogenic	germline/somatic
TP53	17	7577120	7577120	C	A	TCGA-DU-8163-01A-11D-2253-08	LGG		17	7577120	7577120	C	A	NM_000546.6(TP53):c.818G>T (p.Arg273Leu)	Pathogenic	germline/somatic
TP53	17	7577121	7577121	G	A	TCGA-DU-8165-01A-11D-2253-08	LGG		17	7577121	7577121	G	A	NM_000546.6(TP53):c.817C>T (p.Arg273Cys)	Pathogenic/Likely pathogenic	germline/somatic
TP53	17	7578458	7578458	G	T	TCGA-DU-8165-01A-11D-2253-08	LGG		17	7578458	7578458	G	T	NM_000546.6(TP53):c.472C>A (p.Arg158Ser)	Likely pathogenic	germline
TP53	17	7577121	7577121	G	A	TCGA-DU-8166-01A-11D-2253-08	LGG		17	7577121	7577121	G	A	NM_000546.6(TP53):c.817C>T (p.Arg273Cys)	Pathogenic/Likely pathogenic	germline/somatic
TP53	17	7577094	7577094	G	A	TCGA-DU-A5TP-01A-11D-A289-08	LGG		17	7577094	7577094	G	A	NM_000546.6(TP53):c.844C>T (p.Arg282Trp)	Pathogenic/Likely pathogenic	germline/somatic
TP53	17	7577121	7577121	G	A	TCGA-DU-A5TR-01A-11D-A289-08	LGG		17	7577121	7577121	G	A	NM_000546.6(TP53):c.817C>T (p.Arg273Cys)	Pathogenic/Likely pathogenic	germline/somatic
TP53	17	7574034	7574034	C	G	TCGA-DU-A5TW-01A-11D-A289-08	LGG		17	7574034	7574034	C	G	NM_000546.6(TP53):c.994-1G>C	Pathogenic	germline
TP53	17	7577121	7577121	G	A	TCGA-DU-A76O-01A-11D-A32B-08	LGG		17	7577121	7577121	G	A	NM_000546.6(TP53):c.817C>T (p.Arg273Cys)	Pathogenic/Likely pathogenic	germline/somatic
TP53	17	7577121	7577121	G	A	TCGA-DU-A7TC-01A-21D-A34J-08	LGG		17	7577121	7577121	G	A	NM_000546.6(TP53):c.817C>T (p.Arg273Cys)	Pathogenic/Likely pathogenic	germline/somatic
TP53	17	7578212	7578212	G	A	TCGA-DX-A2J1-01A-11D-A21Q-09	SARC		17	7578212	7578212	G	A	NM_000546.6(TP53):c.637C>T (p.Arg213Ter)	Pathogenic	germline/somatic
TP53	17	7577570	7577570	C	T	TCGA-DX-A3M2-01A-21D-A228-09	SARC		17	7577570	7577570	C	T	NM_000546.6(TP53):c.711G>A (p.Met237Ile)	Pathogenic	germline/somatic
TP53	17	7578191	7578191	A	C	TCGA-DX-A3UF-01A-11D-A307-09	SARC		17	7578191	7578191	A	C	NM_000546.6(TP53):c.658T>G (p.Tyr220Asp)	Likely pathogenic	somatic
TP53	17	7578406	7578406	C	T	TCGA-DX-A48J-01A-21D-A307-09	SARC		17	7578406	7578406	C	T	NM_000546.6(TP53):c.524G>A (p.Arg175His)	Pathogenic	germline/somatic
TP53	17	7578457	7578457	C	T	TCGA-DX-A48O-01A-11D-A307-09	SARC		17	7578457	7578457	C	T	NM_000546.6(TP53):c.473G>A (p.Arg158His)	Pathogenic/Likely pathogenic	germline
TP53	17	7578406	7578406	C	A	TCGA-DX-A48U-01A-11D-A307-09	SARC		17	7578406	7578406	C	A	NM_000546.6(TP53):c.524G>T (p.Arg175Leu)	Pathogenic/Likely pathogenic	germline
TP53	17	7576852	7576852	C	A	TCGA-DX-A48V-01A-11D-A307-09	SARC		17	7576852	7576852	C	A	NM_000546.6(TP53):c.993+1G>T	Pathogenic	germline/somatic
TP53	17	7577114	7577114	C	T	TCGA-DX-A6B7-01A-11D-A307-09	SARC		17	7577114	7577114	C	T	NM_000546.6(TP53):c.824G>A (p.Cys275Tyr)	Pathogenic/Likely pathogenic	germline/somatic
TP53	17	7578290	7578290	C	T	TCGA-DX-A6BA-01A-11D-A307-09	SARC		17	7578290	7578290	C	T	NM_000546.6(TP53):c.560-1G>A	Pathogenic	germline/somatic
TP53	17	7578406	7578406	C	T	TCGA-DX-A6BB-01A-12D-A32I-09	SARC		17	7578406	7578406	C	T	NM_000546.6(TP53):c.524G>A (p.Arg175His)	Pathogenic	germline/somatic
TP53	17	7577120	7577120	C	T	TCGA-DX-A7EN-01A-11D-A38Z-09	SARC		17	7577120	7577120	C	T	NM_000546.6(TP53):c.818G>A (p.Arg273His)	Pathogenic	germline/somatic
TP53	17	7577570	7577570	C	T	TCGA-DX-A7EU-01A-22D-A36J-09	SARC		17	7577570	7577570	C	T	NM_000546.6(TP53):c.711G>A (p.Met237Ile)	Pathogenic	germline/somatic
TP53	17	7578370	7578370	C	T	TCGA-DX-A8BH-01A-11D-A37C-09	SARC		17	7578370	7578370	C	T	NM_000546.6(TP53):c.559+1G>A	Pathogenic/Likely pathogenic	germline
TP53	17	7578290	7578290	C	G	TCGA-DX-A8BK-01A-11D-A37C-09	SARC		17	7578290	7578290	C	G	NM_000546.6(TP53):c.560-1G>C	Pathogenic/Likely pathogenic	germline/somatic
TP53	17	7578527	7578527	A	G	TCGA-DX-A8BP-01A-11D-A37C-09	SARC		17	7578527	7578527	A	G	NM_000546.6(TP53):c.403T>C (p.Cys135Arg)	Pathogenic	germline/somatic
TP53	17	7578212	7578212	G	A	TCGA-DX-A8BV-01A-11D-A37C-09	SARC		17	7578212	7578212	G	A	NM_000546.6(TP53):c.637C>T (p.Arg213Ter)	Pathogenic	germline/somatic
TP53	17	7578431	7578431	G	A	TCGA-DX-AATS-01A-12D-A417-09	SARC		17	7578431	7578431	G	A	NM_000546.6(TP53):c.499C>T (p.Gln167Ter)	Pathogenic/Likely pathogenic	germline
TP53	17	7574003	7574003	G	A	TCGA-DX-AB2E-01A-11D-A38Z-09	SARC		17	7574003	7574003	G	A	NM_000546.6(TP53):c.1024C>T (p.Arg342Ter)	Pathogenic	germline/somatic
TP53	17	7578176	7578176	C	A	TCGA-DX-AB2V-01A-11D-A417-09	SARC		17	7578176	7578176	C	A	NM_000546.6(TP53):c.672+1G>T	Pathogenic/Likely pathogenic	germline/somatic
TP53	17	7578406	7578406	C	T	TCGA-DX-AB2X-01A-11D-A387-09	SARC		17	7578406	7578406	C	T	NM_000546.6(TP53):c.524G>A (p.Arg175His)	Pathogenic	germline/somatic
TP53	17	7578406	7578406	C	T	TCGA-DY-A1DC-01A-31D-A152-10	READ		17	7578406	7578406	C	T	NM_000546.6(TP53):c.524G>A (p.Arg175His)	Pathogenic	germline/somatic
TP53	17	7577094	7577094	G	A	TCGA-DY-A1DD-01A-21D-A152-10	READ		17	7577094	7577094	G	A	NM_000546.6(TP53):c.844C>T (p.Arg282Trp)	Pathogenic/Likely pathogenic	germline/somatic
TP53	17	7577120	7577120	C	T	TCGA-DY-A1DF-01A-11D-A152-10	READ		17	7577120	7577120	C	T	NM_000546.6(TP53):c.818G>A (p.Arg273His)	Pathogenic	germline/somatic
TP53	17	7577094	7577094	G	A	TCGA-DY-A1DG-01A-11D-A152-10	READ		17	7577094	7577094	G	A	NM_000546.6(TP53):c.844C>T (p.Arg282Trp)	Pathogenic/Likely pathogenic	germline/somatic
TP53	17	7578550	7578550	G	T	TCGA-E1-5304-01A-01D-1468-08	LGG		17	7578550	7578550	G	T	NM_000546.6(TP53):c.380C>A (p.Ser127Tyr)	Pathogenic	germline
TP53	17	7577129	7577129	A	G	TCGA-E1-5305-01A-01D-1893-08	LGG		17	7577129	7577129	A	G	NM_000546.6(TP53):c.809T>C (p.Phe270Ser)	Pathogenic/Likely pathogenic	germline/somatic
TP53	17	7577121	7577121	G	A	TCGA-E1-5307-01A-01D-1893-08	LGG		17	7577121	7577121	G	A	NM_000546.6(TP53):c.817C>T (p.Arg273Cys)	Pathogenic/Likely pathogenic	germline/somatic
TP53	17	7578442	7578442	T	C	TCGA-E1-5322-01A-01D-1468-08	LGG		17	7578442	7578442	T	C	NM_000546.6(TP53):c.488A>G (p.Tyr163Cys)	Pathogenic	germline/somatic
TP53	17	7577121	7577121	G	A	TCGA-E1-A7YE-01A-11D-A34A-08	LGG		17	7577121	7577121	G	A	NM_000546.6(TP53):c.817C>T (p.Arg273Cys)	Pathogenic/Likely pathogenic	germline/somatic
TP53	17	7577124	7577124	C	T	TCGA-E1-A7YE-01A-11D-A34A-08	LGG		17	7577124	7577124	C	T	NM_000546.6(TP53):c.814G>A (p.Val272Met)	Pathogenic	germline/somatic
TP53	17	7577022	7577022	G	A	TCGA-E1-A7YI-01A-11D-A34A-08	LGG		17	7577022	7577022	G	A	NM_000546.6(TP53):c.916C>T (p.Arg306Ter)	Pathogenic	germline/somatic
TP53	17	7577121	7577121	G	A	TCGA-E1-A7YI-01A-11D-A34A-08	LGG		17	7577121	7577121	G	A	NM_000546.6(TP53):c.817C>T (p.Arg273Cys)	Pathogenic/Likely pathogenic	germline/somatic
TP53	17	7577121	7577121	G	A	TCGA-E1-A7YK-01A-11D-A34A-08	LGG		17	7577121	7577121	G	A	NM_000546.6(TP53):c.817C>T (p.Arg273Cys)	Pathogenic/Likely pathogenic	germline/somatic
TP53	17	7578534	7578534	C	G	TCGA-E1-A7YL-01A-11D-A34A-08	LGG		17	7578534	7578534	C	G	NM_000546.6(TP53):c.396G>C (p.Lys132Asn)	Likely pathogenic	germline/somatic
TP53	17	7577094	7577094	G	A	TCGA-E1-A7YU-01A-11D-A34J-08	LGG		17	7577094	7577094	G	A	NM_000546.6(TP53):c.844C>T (p.Arg282Trp)	Pathogenic/Likely pathogenic	germline/somatic
TP53	17	7577121	7577121	G	A	TCGA-E1-A7YV-01A-11D-A34J-08	LGG		17	7577121	7577121	G	A	NM_000546.6(TP53):c.817C>T (p.Arg273Cys)	Pathogenic/Likely pathogenic	germline/somatic
TP53	17	7577548	7577548	C	T	TCGA-E1-A7YW-01A-11D-A34J-08	LGG		17	7577548	7577548	C	T	NM_000546.6(TP53):c.733G>A (p.Gly245Ser)	Pathogenic	germline/somatic
TP53	17	7577121	7577121	G	A	TCGA-E1-A7Z6-01A-11D-A34J-08	LGG		17	7577121	7577121	G	A	NM_000546.6(TP53):c.817C>T (p.Arg273Cys)	Pathogenic/Likely pathogenic	germline/somatic
TP53	17	7577120	7577120	C	T	TCGA-E2-A108-01A-13D-A10M-09	BRCA		17	7577120	7577120	C	T	NM_000546.6(TP53):c.818G>A (p.Arg273His)	Pathogenic	germline/somatic
TP53	17	7577538	7577538	C	T	TCGA-E2-A109-01A-11D-A10M-09	BRCA		17	7577538	7577538	C	T	NM_000546.6(TP53):c.743G>A (p.Arg248Gln)	Pathogenic	germline/somatic
TP53	17	7578263	7578263	G	A	TCGA-E2-A14N-01A-31D-A135-09	BRCA		17	7578263	7578263	G	A	NM_000546.6(TP53):c.586C>T (p.Arg196Ter)	Pathogenic	germline/somatic
TP53	17	7578265	7578265	A	G	TCGA-E2-A14R-01A-11D-A10Y-09	BRCA		17	7578265	7578265	A	G	NM_000546.6(TP53):c.584T>C (p.Ile195Thr)	Pathogenic	germline/somatic
TP53	17	7578212	7578212	G	A	TCGA-E2-A14X-01A-11D-A10Y-09	BRCA		17	7578212	7578212	G	A	NM_000546.6(TP53):c.637C>T (p.Arg213Ter)	Pathogenic	germline/somatic
TP53	17	7577094	7577094	G	A	TCGA-E2-A14Z-01A-11D-A10Y-09	BRCA		17	7577094	7577094	G	A	NM_000546.6(TP53):c.844C>T (p.Arg282Trp)	Pathogenic/Likely pathogenic	germline/somatic
TP53	17	7578265	7578265	A	G	TCGA-E2-A158-01A-11D-A12B-09	BRCA		17	7578265	7578265	A	G	NM_000546.6(TP53):c.584T>C (p.Ile195Thr)	Pathogenic	germline/somatic
TP53	17	7578271	7578271	T	C	TCGA-E2-A15E-01A-11D-A12B-09	BRCA		17	7578271	7578271	T	C	NM_000546.6(TP53):c.578A>G (p.His193Arg)	Pathogenic/Likely pathogenic	germline/somatic
TP53	17	7578534	7578534	C	G	TCGA-E2-A1B0-01A-11D-A12Q-09	BRCA		17	7578534	7578534	C	G	NM_000546.6(TP53):c.396G>C (p.Lys132Asn)	Likely pathogenic	germline/somatic
TP53	17	7574003	7574003	G	A	TCGA-E2-A1B6-01A-31D-A12Q-09	BRCA		17	7574003	7574003	G	A	NM_000546.6(TP53):c.1024C>T (p.Arg342Ter)	Pathogenic	germline/somatic
TP53	17	7578535	7578535	T	G	TCGA-E2-A1LH-01A-11D-A14G-09	BRCA		17	7578535	7578535	T	G	NM_000546.6(TP53):c.395A>C (p.Lys132Thr)	Likely pathogenic	somatic
TP53	17	7578190	7578190	T	C	TCGA-E2-A573-01A-11D-A29N-09	BRCA		17	7578190	7578190	T	C	NM_000546.6(TP53):c.659A>G (p.Tyr220Cys)	Pathogenic	germline/somatic
TP53	17	7577538	7577538	C	T	TCGA-E2-A574-01A-11D-A29N-09	BRCA		17	7577538	7577538	C	T	NM_000546.6(TP53):c.743G>A (p.Arg248Gln)	Pathogenic	germline/somatic
TP53	17	7577121	7577121	G	A	TCGA-E6-A2P8-01A-11D-A19Y-09	UCEC		17	7577121	7577121	G	A	NM_000546.6(TP53):c.817C>T (p.Arg273Cys)	Pathogenic/Likely pathogenic	germline/somatic
TP53	17	7578508	7578508	C	T	TCGA-E6-A8L9-01A-21D-A37N-09	UCEC		17	7578508	7578508	C	T	NM_000546.6(TP53):c.422G>A (p.Cys141Tyr)	Pathogenic	germline/somatic
TP53	17	7577085	7577085	C	T	TCGA-E7-A7DV-01A-11D-A339-08	BLCA		17	7577085	7577085	C	T	NM_000546.6(TP53):c.853G>A (p.Glu285Lys)	Pathogenic/Likely pathogenic	germline/somatic
TP53	17	7578271	7578271	T	C	TCGA-E9-A1N5-01A-11D-A14G-09	BRCA		17	7578271	7578271	T	C	NM_000546.6(TP53):c.578A>G (p.His193Arg)	Pathogenic/Likely pathogenic	germline/somatic
TP53	17	7578263	7578263	G	A	TCGA-E9-A1N9-01A-11D-A14G-09	BRCA		17	7578263	7578263	G	A	NM_000546.6(TP53):c.586C>T (p.Arg196Ter)	Pathogenic	germline/somatic
TP53	17	7577548	7577548	C	T	TCGA-E9-A22E-01A-11D-A159-09	BRCA		17	7577548	7577548	C	T	NM_000546.6(TP53):c.733G>A (p.Gly245Ser)	Pathogenic	germline/somatic
TP53	17	7578190	7578190	T	G	TCGA-E9-A243-01A-21D-A167-09	BRCA		17	7578190	7578190	T	G	NM_000546.6(TP53):c.659A>C (p.Tyr220Ser)	Pathogenic	germline/somatic
TP53	17	7579414	7579414	C	T	TCGA-E9-A243-01A-21D-A167-09	BRCA		17	7579414	7579414	C	T	NM_000546.6(TP53):c.273G>A (p.Trp91Ter)	Pathogenic	germline/somatic
TP53	17	7578406	7578406	C	T	TCGA-E9-A244-01A-11D-A167-09	BRCA		17	7578406	7578406	C	T	NM_000546.6(TP53):c.524G>A (p.Arg175His)	Pathogenic	germline/somatic
TP53	17	7578271	7578271	T	C	TCGA-E9-A5FL-01A-11D-A27P-09	BRCA		17	7578271	7578271	T	C	NM_000546.6(TP53):c.578A>G (p.His193Arg)	Pathogenic/Likely pathogenic	germline/somatic
TP53	17	7577022	7577022	G	A	TCGA-E9-A6HE-01A-11D-A31U-09	BRCA		17	7577022	7577022	G	A	NM_000546.6(TP53):c.916C>T (p.Arg306Ter)	Pathogenic	germline/somatic
TP53	17	7574017	7574017	C	T	TCGA-EA-A5FO-01A-21D-A28B-09	CESC		17	7574017	7574017	C	T	NM_000546.6(TP53):c.1010G>A (p.Arg337His)	Pathogenic/Likely pathogenic	germline
TP53	17	7577539	7577539	G	A	TCGA-EB-A299-01A-21D-A197-08	SKCM		17	7577539	7577539	G	A	NM_000546.6(TP53):c.742C>T (p.Arg248Trp)	Pathogenic	germline/somatic
TP53	17	7577114	7577114	C	T	TCGA-EB-A3XC-01A-11D-A23B-08	SKCM		17	7577114	7577114	C	T	NM_000546.6(TP53):c.824G>A (p.Cys275Tyr)	Pathogenic/Likely pathogenic	germline/somatic
TP53	17	7574003	7574003	G	A	TCGA-EB-A431-01A-11D-A25O-08	SKCM		17	7574003	7574003	G	A	NM_000546.6(TP53):c.1024C>T (p.Arg342Ter)	Pathogenic	germline/somatic
TP53	17	7578212	7578212	G	A	TCGA-EB-A5FP-01A-11D-A27K-08	SKCM		17	7578212	7578212	G	A	NM_000546.6(TP53):c.637C>T (p.Arg213Ter)	Pathogenic	germline/somatic
TP53	17	7578190	7578190	T	C	TCGA-ED-A459-01A-11D-A25V-10	LIHC		17	7578190	7578190	T	C	NM_000546.6(TP53):c.659A>G (p.Tyr220Cys)	Pathogenic	germline/somatic
TP53	17	7578257	7578257	C	A	TCGA-EE-A29V-06A-12D-A197-08	SKCM		17	7578257	7578257	C	A	NM_000546.6(TP53):c.592G>T (p.Glu198Ter)	Pathogenic	somatic
TP53	17	7576897	7576897	G	A	TCGA-EE-A2A2-06A-11D-A196-08	SKCM		17	7576897	7576897	G	A	NM_000546.6(TP53):c.949C>T (p.Gln317Ter)	Pathogenic/Likely pathogenic	germline
TP53	17	7577539	7577539	G	A	TCGA-EE-A2GP-06A-11D-A197-08	SKCM		17	7577539	7577539	G	A	NM_000546.6(TP53):c.742C>T (p.Arg248Trp)	Pathogenic	germline/somatic
TP53	17	7574003	7574003	G	A	TCGA-EE-A2GT-06A-12D-A197-08	SKCM		17	7574003	7574003	G	A	NM_000546.6(TP53):c.1024C>T (p.Arg342Ter)	Pathogenic	germline/somatic
TP53	17	7579310	7579310	A	G	TCGA-EE-A2MQ-06A-11D-A197-08	SKCM		17	7579310	7579310	A	G	NM_000546.6(TP53):c.375+2T>C	Likely pathogenic	germline
TP53	17	7577141	7577141	C	T	TCGA-EE-A2MU-06A-21D-A196-08	SKCM		17	7577141	7577141	C	T	NM_000546.6(TP53):c.797G>A (p.Gly266Glu)	Pathogenic/Likely pathogenic	germline/somatic
TP53	17	7578479	7578479	G	A	TCGA-EE-A3AA-06A-11D-A196-08	SKCM		17	7578479	7578479	G	A	NM_000546.6(TP53):c.451C>T (p.Pro151Ser)	Pathogenic/Likely pathogenic	germline/somatic
TP53	17	7577559	7577559	G	A	TCGA-EE-A3AD-06A-11D-A196-08	SKCM		17	7577559	7577559	G	A	NM_000546.6(TP53):c.722C>T (p.Ser241Phe)	Likely pathogenic	germline/somatic
TP53	17	7578212	7578212	G	A	TCGA-EE-A3AE-06A-11D-A196-08	SKCM		17	7578212	7578212	G	A	NM_000546.6(TP53):c.637C>T (p.Arg213Ter)	Pathogenic	germline/somatic
TP53	17	7578212	7578212	G	A	TCGA-EE-A3AG-06A-31D-A196-08	SKCM		17	7578212	7578212	G	A	NM_000546.6(TP53):c.637C>T (p.Arg213Ter)	Pathogenic	germline/somatic
TP53	17	7578211	7578211	C	T	TCGA-EE-A3J5-06A-11D-A20D-08	SKCM		17	7578211	7578211	C	T	NM_000546.6(TP53):c.638G>A (p.Arg213Gln)	Pathogenic	germline/somatic
TP53	17	7577559	7577559	G	A	TCGA-EE-A3J7-06A-11D-A20D-08	SKCM		17	7577559	7577559	G	A	NM_000546.6(TP53):c.722C>T (p.Ser241Phe)	Likely pathogenic	germline/somatic
TP53	17	7576897	7576897	G	A	TCGA-EE-A3JD-06A-11D-A20D-08	SKCM		17	7576897	7576897	G	A	NM_000546.6(TP53):c.949C>T (p.Gln317Ter)	Pathogenic/Likely pathogenic	germline
TP53	17	7577094	7577094	G	A	TCGA-EF-5830-01A-01D-1657-10	READ		17	7577094	7577094	G	A	NM_000546.6(TP53):c.844C>T (p.Arg282Trp)	Pathogenic/Likely pathogenic	germline/somatic
TP53	17	7577121	7577121	G	A	TCGA-EI-6506-01A-11D-1733-10	READ		17	7577121	7577121	G	A	NM_000546.6(TP53):c.817C>T (p.Arg273Cys)	Pathogenic/Likely pathogenic	germline/somatic
TP53	17	7577121	7577121	G	A	TCGA-EI-6507-01A-11D-1733-10	READ		17	7577121	7577121	G	A	NM_000546.6(TP53):c.817C>T (p.Arg273Cys)	Pathogenic/Likely pathogenic	germline/somatic
TP53	17	7578370	7578370	C	T	TCGA-EI-6508-01A-11D-1733-10	READ		17	7578370	7578370	C	T	NM_000546.6(TP53):c.559+1G>A	Pathogenic/Likely pathogenic	germline
TP53	17	7577094	7577094	G	A	TCGA-EI-6509-01A-11D-1733-10	READ		17	7577094	7577094	G	A	NM_000546.6(TP53):c.844C>T (p.Arg282Trp)	Pathogenic/Likely pathogenic	germline/somatic
TP53	17	7577539	7577539	G	A	TCGA-EI-6510-01A-11D-1733-10	READ		17	7577539	7577539	G	A	NM_000546.6(TP53):c.742C>T (p.Arg248Trp)	Pathogenic	germline/somatic
TP53	17	7578406	7578406	C	T	TCGA-EI-6511-01A-11D-1733-10	READ		17	7578406	7578406	C	T	NM_000546.6(TP53):c.524G>A (p.Arg175His)	Pathogenic	germline/somatic
TP53	17	7577121	7577121	G	A	TCGA-EI-6514-01A-11D-1733-10	READ		17	7577121	7577121	G	A	NM_000546.6(TP53):c.817C>T (p.Arg273Cys)	Pathogenic/Likely pathogenic	germline/somatic
TP53	17	7577022	7577022	G	A	TCGA-EI-6881-01A-11D-1924-10	READ		17	7577022	7577022	G	A	NM_000546.6(TP53):c.916C>T (p.Arg306Ter)	Pathogenic	germline/somatic
TP53	17	7577538	7577538	C	T	TCGA-EI-6882-01A-11D-1924-10	READ		17	7577538	7577538	C	T	NM_000546.6(TP53):c.743G>A (p.Arg248Gln)	Pathogenic	germline/somatic
TP53	17	7577548	7577548	C	T	TCGA-EI-6883-01A-31D-1924-10	READ		17	7577548	7577548	C	T	NM_000546.6(TP53):c.733G>A (p.Gly245Ser)	Pathogenic	germline/somatic
TP53	17	7578555	7578555	C	T	TCGA-EI-6884-01A-11D-1924-10	READ		17	7578555	7578555	C	T	NM_000546.6(TP53):c.376-1G>A	Pathogenic/Likely pathogenic	germline/somatic
TP53	17	7578211	7578211	C	T	TCGA-EI-6917-01A-11D-1924-10	READ		17	7578211	7578211	C	T	NM_000546.6(TP53):c.638G>A (p.Arg213Gln)	Pathogenic	germline/somatic
TP53	17	7578212	7578212	G	A	TCGA-EI-6917-01A-11D-1924-10	READ		17	7578212	7578212	G	A	NM_000546.6(TP53):c.637C>T (p.Arg213Ter)	Pathogenic	germline/somatic
TP53	17	7577094	7577094	G	A	TCGA-EI-7002-01A-11D-1924-10	READ		17	7577094	7577094	G	A	NM_000546.6(TP53):c.844C>T (p.Arg282Trp)	Pathogenic/Likely pathogenic	germline/somatic
TP53	17	7578406	7578406	C	T	TCGA-EJ-5507-01A-01D-1576-08	PRAD		17	7578406	7578406	C	T	NM_000546.6(TP53):c.524G>A (p.Arg175His)	Pathogenic	germline/somatic
TP53	17	7577094	7577094	G	A	TCGA-EJ-5514-01A-01D-1576-08	PRAD		17	7577094	7577094	G	A	NM_000546.6(TP53):c.844C>T (p.Arg282Trp)	Pathogenic/Likely pathogenic	germline/somatic
TP53	17	7577548	7577548	C	T	TCGA-EJ-5521-01A-01D-1576-08	PRAD		17	7577548	7577548	C	T	NM_000546.6(TP53):c.733G>A (p.Gly245Ser)	Pathogenic	germline/somatic
TP53	17	7574018	7574018	G	A	TCGA-EJ-7315-01A-31D-2114-08	PRAD		17	7574018	7574018	G	A	NM_000546.6(TP53):c.1009C>T (p.Arg337Cys)	Pathogenic/Likely pathogenic	germline/somatic
TP53	17	7578457	7578457	C	T	TCGA-EJ-7782-01A-11D-2114-08	PRAD		17	7578457	7578457	C	T	NM_000546.6(TP53):c.473G>A (p.Arg158His)	Pathogenic/Likely pathogenic	germline
TP53	17	7578253	7578253	C	A	TCGA-EJ-8472-01A-11D-2395-08	PRAD		17	7578253	7578253	C	A	NM_000546.6(TP53):c.596G>T (p.Gly199Val)	Likely pathogenic	germline
TP53	17	7578534	7578534	C	G	TCGA-EK-A2PM-01A-11D-A18J-09	CESC		17	7578534	7578534	C	G	NM_000546.6(TP53):c.396G>C (p.Lys132Asn)	Likely pathogenic	germline/somatic
TP53	17	7578275	7578275	G	A	TCGA-EM-A1YB-01A-11D-A14W-08	THCA		17	7578275	7578275	G	A	NM_000546.6(TP53):c.574C>T (p.Gln192Ter)	Pathogenic	germline
TP53	17	7577571	7577571	A	T	TCGA-EO-A1Y5-01A-11D-A159-09	UCEC		17	7577571	7577571	A	T	NM_000546.6(TP53):c.710T>A (p.Met237Lys)	Likely pathogenic	somatic
TP53	17	7577121	7577121	G	A	TCGA-EO-A1Y7-01A-11D-A159-09	UCEC		17	7577121	7577121	G	A	NM_000546.6(TP53):c.817C>T (p.Arg273Cys)	Pathogenic/Likely pathogenic	germline/somatic
TP53	17	7577559	7577559	G	C	TCGA-EO-A1Y8-01A-11D-A159-09	UCEC		17	7577559	7577559	G	C	NM_000546.6(TP53):c.722C>G (p.Ser241Cys)	Likely pathogenic	germline/somatic
TP53	17	7574002	7574002	C	G	TCGA-EO-A2CG-01A-12D-A17W-09	UCEC		17	7574002	7574002	C	G	NM_000546.6(TP53):c.1025G>C (p.Arg342Pro)	Pathogenic/Likely pathogenic	germline/somatic
TP53	17	7577114	7577114	C	A	TCGA-EO-A2CH-01A-11D-A17W-09	UCEC		17	7577114	7577114	C	A	NM_000546.6(TP53):c.824G>T (p.Cys275Phe)	Likely pathogenic	somatic
TP53	17	7578550	7578550	G	T	TCGA-EO-A3AS-01A-11D-A19Y-09	UCEC		17	7578550	7578550	G	T	NM_000546.6(TP53):c.380C>A (p.Ser127Tyr)	Pathogenic	germline
TP53	17	7573010	7573010	T	C	TCGA-EO-A3AZ-01A-12D-A19Y-09	UCEC		17	7573010	7573010	T	C	NM_000546.6(TP53):c.1101-2A>G	Pathogenic/Likely pathogenic	germline/somatic
TP53	17	7577538	7577538	C	T	TCGA-EO-A3B1-01A-12D-A19Y-09	UCEC		17	7577538	7577538	C	T	NM_000546.6(TP53):c.743G>A (p.Arg248Gln)	Pathogenic	germline/somatic
TP53	17	7577120	7577120	C	T	TCGA-EO-A3KU-01A-11D-A228-09	UCEC		17	7577120	7577120	C	T	NM_000546.6(TP53):c.818G>A (p.Arg273His)	Pathogenic	germline/somatic
TP53	17	7577547	7577547	C	A	TCGA-EO-A3L0-01A-11D-A228-09	UCEC		17	7577547	7577547	C	A	NM_000546.6(TP53):c.734G>T (p.Gly245Val)	Pathogenic	germline/somatic
TP53	17	7578555	7578555	C	T	TCGA-ER-A199-06A-11D-A197-08	SKCM		17	7578555	7578555	C	T	NM_000546.6(TP53):c.376-1G>A	Pathogenic/Likely pathogenic	germline/somatic
TP53	17	7578176	7578176	C	T	TCGA-ER-A19E-06A-11D-A197-08	SKCM		17	7578176	7578176	C	T	NM_000546.6(TP53):c.672+1G>A	Pathogenic	germline
TP53	17	7578190	7578190	T	C	TCGA-ER-A3ET-06A-11D-A20D-08	SKCM		17	7578190	7578190	T	C	NM_000546.6(TP53):c.659A>G (p.Tyr220Cys)	Pathogenic	germline/somatic
TP53	17	7577509	7577509	C	A	TCGA-EW-A1OZ-01A-11D-A142-09	BRCA		17	7577509	7577509	C	A	NM_000546.6(TP53):c.772G>T (p.Glu258Ter)	Pathogenic	germline/somatic
TP53	17	7577120	7577120	C	T	TCGA-EW-A1P1-01A-31D-A14G-09	BRCA		17	7577120	7577120	C	T	NM_000546.6(TP53):c.818G>A (p.Arg273His)	Pathogenic	germline/somatic
TP53	17	7577094	7577094	G	A	TCGA-EW-A1P8-01A-11D-A142-09	BRCA		17	7577094	7577094	G	A	NM_000546.6(TP53):c.844C>T (p.Arg282Trp)	Pathogenic/Likely pathogenic	germline/somatic
TP53	17	7578212	7578212	G	A	TCGA-EW-A1PA-01A-11D-A142-09	BRCA		17	7578212	7578212	G	A	NM_000546.6(TP53):c.637C>T (p.Arg213Ter)	Pathogenic	germline/somatic
TP53	17	7578442	7578442	T	C	TCGA-EW-A1PB-01A-11D-A142-09	BRCA		17	7578442	7578442	T	C	NM_000546.6(TP53):c.488A>G (p.Tyr163Cys)	Pathogenic	germline/somatic
TP53	17	7578406	7578406	C	T	TCGA-EW-A2FR-01A-11D-A21Q-09	BRCA		17	7578406	7578406	C	T	NM_000546.6(TP53):c.524G>A (p.Arg175His)	Pathogenic	germline/somatic
TP53	17	7577094	7577094	G	A	TCGA-EW-A6SB-01A-12D-A32I-09	BRCA		17	7577094	7577094	G	A	NM_000546.6(TP53):c.844C>T (p.Arg282Trp)	Pathogenic/Likely pathogenic	germline/somatic
TP53	17	7577082	7577082	C	T	TCGA-EW-A6SD-01A-12D-A33E-09	BRCA		17	7577082	7577082	C	T	NM_000546.6(TP53):c.856G>A (p.Glu286Lys)	Pathogenic	germline/somatic
TP53	17	7578212	7578212	G	A	TCGA-EY-A1G8-01A-11D-A13L-09	UCEC		17	7578212	7578212	G	A	NM_000546.6(TP53):c.637C>T (p.Arg213Ter)	Pathogenic	germline/somatic
TP53	17	7577121	7577121	G	A	TCGA-EY-A1GC-01A-11D-A13L-09	UCEC		17	7577121	7577121	G	A	NM_000546.6(TP53):c.817C>T (p.Arg273Cys)	Pathogenic/Likely pathogenic	germline/somatic
TP53	17	7577120	7577120	C	T	TCGA-EY-A1GJ-01A-12D-A142-09	UCEC		17	7577120	7577120	C	T	NM_000546.6(TP53):c.818G>A (p.Arg273His)	Pathogenic	germline/somatic
TP53	17	7578413	7578413	C	T	TCGA-EY-A1GM-01A-12D-A14G-09	UCEC		17	7578413	7578413	C	T	NM_000546.6(TP53):c.517G>A (p.Val173Met)	Pathogenic	germline/somatic
TP53	17	7578406	7578406	C	T	TCGA-EY-A1GR-01A-11D-A13L-09	UCEC		17	7578406	7578406	C	T	NM_000546.6(TP53):c.524G>A (p.Arg175His)	Pathogenic	germline/somatic
TP53	17	7578508	7578508	C	T	TCGA-EY-A1GW-01A-22D-A13L-09	UCEC		17	7578508	7578508	C	T	NM_000546.6(TP53):c.422G>A (p.Cys141Tyr)	Pathogenic	germline/somatic
TP53	17	7578527	7578527	A	G	TCGA-EY-A1GW-01A-22D-A13L-09	UCEC		17	7578527	7578527	A	G	NM_000546.6(TP53):c.403T>C (p.Cys135Arg)	Pathogenic	germline/somatic
TP53	17	7577058	7577058	C	A	TCGA-EY-A214-01A-12D-A159-09	UCEC		17	7577058	7577058	C	A	NM_000546.6(TP53):c.880G>T (p.Glu294Ter)	Pathogenic	germline/somatic
TP53	17	7577120	7577120	C	A	TCGA-EY-A3QX-01A-11D-A228-09	UCEC		17	7577120	7577120	C	A	NM_000546.6(TP53):c.818G>T (p.Arg273Leu)	Pathogenic	germline/somatic
TP53	17	7577539	7577539	G	A	TCGA-EY-A4KR-01A-11D-A27P-09	UCEC		17	7577539	7577539	G	A	NM_000546.6(TP53):c.742C>T (p.Arg248Trp)	Pathogenic	germline/somatic
TP53	17	7577538	7577538	C	T	TCGA-EY-A547-01A-11D-A27P-09	UCEC		17	7577538	7577538	C	T	NM_000546.6(TP53):c.743G>A (p.Arg248Gln)	Pathogenic	germline/somatic
TP53	17	7577497	7577497	A	C	TCGA-F1-6875-01A-11D-2053-08	STAD		17	7577497	7577497	A	C	NM_000546.6(TP53):c.782+2T>G	Likely pathogenic	germline/somatic
TP53	17	7578190	7578190	T	C	TCGA-F2-6879-01A-11D-2154-08	PAAD		17	7578190	7578190	T	C	NM_000546.6(TP53):c.659A>G (p.Tyr220Cys)	Pathogenic	germline/somatic
TP53	17	7577538	7577538	C	T	TCGA-F4-6459-01A-11D-1771-10	COAD		17	7577538	7577538	C	T	NM_000546.6(TP53):c.743G>A (p.Arg248Gln)	Pathogenic	germline/somatic
TP53	17	7574018	7574018	G	A	TCGA-F4-6460-01A-11D-1771-10	COAD		17	7574018	7574018	G	A	NM_000546.6(TP53):c.1009C>T (p.Arg337Cys)	Pathogenic/Likely pathogenic	germline/somatic
TP53	17	7577539	7577539	G	A	TCGA-F4-6805-01A-11D-1835-10	COAD		17	7577539	7577539	G	A	NM_000546.6(TP53):c.742C>T (p.Arg248Trp)	Pathogenic	germline/somatic
TP53	17	7574003	7574003	G	A	TCGA-F4-6808-01A-11D-1835-10	COAD		17	7574003	7574003	G	A	NM_000546.6(TP53):c.1024C>T (p.Arg342Ter)	Pathogenic	germline/somatic
TP53	17	7577094	7577094	G	A	TCGA-F4-6854-01A-11D-1924-10	COAD		17	7577094	7577094	G	A	NM_000546.6(TP53):c.844C>T (p.Arg282Trp)	Pathogenic/Likely pathogenic	germline/somatic
TP53	17	7578406	7578406	C	T	TCGA-F4-6854-01A-11D-1924-10	COAD		17	7578406	7578406	C	T	NM_000546.6(TP53):c.524G>A (p.Arg175His)	Pathogenic	germline/somatic
TP53	17	7577022	7577022	G	A	TCGA-F4-6856-01A-11D-1924-10	COAD		17	7577022	7577022	G	A	NM_000546.6(TP53):c.916C>T (p.Arg306Ter)	Pathogenic	germline/somatic
TP53	17	7577114	7577114	C	T	TCGA-F5-6464-01A-11D-1733-10	READ		17	7577114	7577114	C	T	NM_000546.6(TP53):c.824G>A (p.Cys275Tyr)	Pathogenic/Likely pathogenic	germline/somatic
TP53	17	7578492	7578492	C	T	TCGA-F5-6465-01A-11D-1733-10	READ		17	7578492	7578492	C	T	NM_000546.6(TP53):c.438G>A (p.Trp146Ter)	Pathogenic	germline/somatic
TP53	17	7578263	7578263	G	A	TCGA-F5-6571-01A-12D-1826-10	READ		17	7578263	7578263	G	A	NM_000546.6(TP53):c.586C>T (p.Arg196Ter)	Pathogenic	germline/somatic
TP53	17	7578406	7578406	C	T	TCGA-F5-6811-01A-11D-1826-10	READ		17	7578406	7578406	C	T	NM_000546.6(TP53):c.524G>A (p.Arg175His)	Pathogenic	germline/somatic
TP53	17	7578406	7578406	C	T	TCGA-F5-6813-01A-11D-1826-10	READ		17	7578406	7578406	C	T	NM_000546.6(TP53):c.524G>A (p.Arg175His)	Pathogenic	germline/somatic
TP53	17	7578212	7578212	G	A	TCGA-F5-6814-01A-31D-1924-10	READ		17	7578212	7578212	G	A	NM_000546.6(TP53):c.637C>T (p.Arg213Ter)	Pathogenic	germline/somatic
TP53	17	7577539	7577539	G	A	TCGA-F5-6863-01A-11D-1924-10	READ		17	7577539	7577539	G	A	NM_000546.6(TP53):c.742C>T (p.Arg248Trp)	Pathogenic	germline/somatic
TP53	17	7578419	7578419	C	A	TCGA-F5-6864-01A-11D-1924-10	READ		17	7578419	7578419	C	A	NM_000546.6(TP53):c.511G>T (p.Glu171Ter)	Pathogenic	germline/somatic
TP53	17	7578406	7578406	C	T	TCGA-F6-A8O4-01A-11D-A36O-08	LGG		17	7578406	7578406	C	T	NM_000546.6(TP53):c.524G>A (p.Arg175His)	Pathogenic	germline/somatic
TP53	17	7577081	7577081	T	A	TCGA-F7-7848-01A-11D-2129-08	HNSC		17	7577081	7577081	T	A	NM_000546.6(TP53):c.857A>T (p.Glu286Val)	Likely pathogenic	somatic
TP53	17	7577141	7577141	C	T	TCGA-F7-8489-01A-31D-2394-08	HNSC		17	7577141	7577141	C	T	NM_000546.6(TP53):c.797G>A (p.Gly266Glu)	Pathogenic/Likely pathogenic	germline/somatic
TP53	17	7577114	7577114	C	T	TCGA-F7-A50I-01A-11D-A28R-08	HNSC		17	7577114	7577114	C	T	NM_000546.6(TP53):c.824G>A (p.Cys275Tyr)	Pathogenic/Likely pathogenic	germline/somatic
TP53	17	7577538	7577538	C	T	TCGA-F7-A61S-01A-11D-A28R-08	HNSC		17	7577538	7577538	C	T	NM_000546.6(TP53):c.743G>A (p.Arg248Gln)	Pathogenic	germline/somatic
TP53	17	7578479	7578479	G	A	TCGA-F7-A620-01A-11D-A28R-08	HNSC		17	7578479	7578479	G	A	NM_000546.6(TP53):c.451C>T (p.Pro151Ser)	Pathogenic/Likely pathogenic	germline/somatic
TP53	17	7577121	7577121	G	A	TCGA-FA-A82F-01A-11D-A382-10	DLBC		17	7577121	7577121	G	A	NM_000546.6(TP53):c.817C>T (p.Arg273Cys)	Pathogenic/Likely pathogenic	germline/somatic
TP53	17	7577121	7577121	G	A	TCGA-FB-A545-01A-11D-A26I-08	PAAD		17	7577121	7577121	G	A	NM_000546.6(TP53):c.817C>T (p.Arg273Cys)	Pathogenic/Likely pathogenic	germline/somatic
TP53	17	7577538	7577538	C	A	TCGA-FB-A78T-01A-12D-A32N-08	PAAD		17	7577538	7577538	C	A	NM_000546.6(TP53):c.743G>T (p.Arg248Leu)	Pathogenic	germline/somatic
TP53	17	7578395	7578395	G	A	TCGA-FB-AAPS-01A-12D-A397-08	PAAD		17	7578395	7578395	G	A	NM_000546.6(TP53):c.535C>T (p.His179Tyr)	Pathogenic/Likely pathogenic	germline/somatic
TP53	17	7578212	7578212	G	A	TCGA-FB-AAPZ-01A-11D-A40W-08	PAAD		17	7578212	7578212	G	A	NM_000546.6(TP53):c.637C>T (p.Arg213Ter)	Pathogenic	germline/somatic
TP53	17	7578235	7578235	T	G	TCGA-FB-AAQ0-01A-31D-A40W-08	PAAD		17	7578235	7578235	T	G	NM_000546.6(TP53):c.614A>C (p.Tyr205Ser)	Likely pathogenic	somatic
TP53	17	7577538	7577538	C	T	TCGA-FB-AAQ6-01A-11D-A40W-08	PAAD		17	7577538	7577538	C	T	NM_000546.6(TP53):c.743G>A (p.Arg248Gln)	Pathogenic	germline/somatic
TP53	17	7577547	7577547	C	A	TCGA-FD-A3B6-01A-21D-A20D-08	BLCA		17	7577547	7577547	C	A	NM_000546.6(TP53):c.734G>T (p.Gly245Val)	Pathogenic	germline/somatic
TP53	17	7577538	7577538	C	T	TCGA-FD-A3B7-01A-31D-A20D-08	BLCA		17	7577538	7577538	C	T	NM_000546.6(TP53):c.743G>A (p.Arg248Gln)	Pathogenic	germline/somatic
TP53	17	7578419	7578419	C	A	TCGA-FD-A3B8-01A-31D-A20D-08	BLCA		17	7578419	7578419	C	A	NM_000546.6(TP53):c.511G>T (p.Glu171Ter)	Pathogenic	germline/somatic
TP53	17	7578208	7578208	T	C	TCGA-FD-A3N5-01A-11D-A21A-08	BLCA		17	7578208	7578208	T	C	NM_000546.6(TP53):c.641A>G (p.His214Arg)	Likely pathogenic	germline/somatic
TP53	17	7578275	7578275	G	A	TCGA-FD-A3NA-01A-11D-A21A-08	BLCA		17	7578275	7578275	G	A	NM_000546.6(TP53):c.574C>T (p.Gln192Ter)	Pathogenic	germline
TP53	17	7577559	7577559	G	A	TCGA-FD-A3SJ-01A-12D-A22Z-08	BLCA		17	7577559	7577559	G	A	NM_000546.6(TP53):c.722C>T (p.Ser241Phe)	Likely pathogenic	germline/somatic
TP53	17	7579529	7579529	C	T	TCGA-FD-A3SO-01A-11D-A22Z-08	BLCA		17	7579529	7579529	C	T	NM_000546.6(TP53):c.158G>A (p.Trp53Ter)	Pathogenic	germline/somatic
TP53	17	7578406	7578406	C	T	TCGA-FD-A3SS-01A-12D-A22Z-08	BLCA		17	7578406	7578406	C	T	NM_000546.6(TP53):c.524G>A (p.Arg175His)	Pathogenic	germline/somatic
TP53	17	7577085	7577085	C	T	TCGA-FD-A43N-01A-11D-A23U-08	BLCA		17	7577085	7577085	C	T	NM_000546.6(TP53):c.853G>A (p.Glu285Lys)	Pathogenic/Likely pathogenic	germline/somatic
TP53	17	7577085	7577085	C	T	TCGA-FD-A43P-01A-31D-A23U-08	BLCA		17	7577085	7577085	C	T	NM_000546.6(TP53):c.853G>A (p.Glu285Lys)	Pathogenic/Likely pathogenic	germline/somatic
TP53	17	7577570	7577570	C	T	TCGA-FD-A5BV-01A-11D-A26M-08	BLCA		17	7577570	7577570	C	T	NM_000546.6(TP53):c.711G>A (p.Met237Ile)	Pathogenic	germline/somatic
TP53	17	7577568	7577568	C	A	TCGA-FD-A62S-01A-11D-A30E-08	BLCA		17	7577568	7577568	C	A	NM_000546.6(TP53):c.713G>T (p.Cys238Phe)	Pathogenic	germline/somatic
TP53	17	7577509	7577509	C	T	TCGA-FD-A6TC-01A-21D-A339-08	BLCA		17	7577509	7577509	C	T	NM_000546.6(TP53):c.772G>A (p.Glu258Lys)	Pathogenic/Likely pathogenic	germline/somatic
TP53	17	7578290	7578290	C	T	TCGA-FD-A6TE-01A-12D-A339-08	BLCA		17	7578290	7578290	C	T	NM_000546.6(TP53):c.560-1G>A	Pathogenic	germline/somatic
TP53	17	7578534	7578534	C	G	TCGA-FD-A6TE-01A-12D-A339-08	BLCA		17	7578534	7578534	C	G	NM_000546.6(TP53):c.396G>C (p.Lys132Asn)	Likely pathogenic	germline/somatic
TP53	17	7578419	7578419	C	A	TCGA-FF-8043-01A-11D-2210-10	DLBC		17	7578419	7578419	C	A	NM_000546.6(TP53):c.511G>T (p.Glu171Ter)	Pathogenic	germline/somatic
TP53	17	7578458	7578458	G	C	TCGA-FG-5963-01A-11D-1705-08	LGG		17	7578458	7578458	G	C	NM_000546.6(TP53):c.472C>G (p.Arg158Gly)	Pathogenic	germline
TP53	17	7577121	7577121	G	A	TCGA-FG-5965-01B-11D-1893-08	LGG		17	7577121	7577121	G	A	NM_000546.6(TP53):c.817C>T (p.Arg273Cys)	Pathogenic/Likely pathogenic	germline/somatic
TP53	17	7577568	7577568	C	T	TCGA-FG-6690-01A-11D-1893-08	LGG		17	7577568	7577568	C	T	NM_000546.6(TP53):c.713G>A (p.Cys238Tyr)	Pathogenic/Likely pathogenic	germline/somatic
TP53	17	7578263	7578263	G	A	TCGA-FG-6690-01A-11D-1893-08	LGG		17	7578263	7578263	G	A	NM_000546.6(TP53):c.586C>T (p.Arg196Ter)	Pathogenic	germline/somatic
TP53	17	7577121	7577121	G	A	TCGA-FG-7636-01A-11D-2086-08	LGG		17	7577121	7577121	G	A	NM_000546.6(TP53):c.817C>T (p.Arg273Cys)	Pathogenic/Likely pathogenic	germline/somatic
TP53	17	7574012	7574012	C	A	TCGA-FG-8182-01A-11D-2253-08	LGG		17	7574012	7574012	C	A	NM_000546.6(TP53):c.1015G>T (p.Glu339Ter)	Pathogenic	germline
TP53	17	7579311	7579311	C	T	TCGA-FG-8182-01A-11D-2253-08	LGG		17	7579311	7579311	C	T	NM_000546.6(TP53):c.375+1G>A	Pathogenic/Likely pathogenic	germline/somatic
TP53	17	7577121	7577121	G	A	TCGA-FG-8188-01A-11D-2253-08	LGG		17	7577121	7577121	G	A	NM_000546.6(TP53):c.817C>T (p.Arg273Cys)	Pathogenic/Likely pathogenic	germline/somatic
TP53	17	7578457	7578457	C	T	TCGA-FG-8188-01A-11D-2253-08	LGG		17	7578457	7578457	C	T	NM_000546.6(TP53):c.473G>A (p.Arg158His)	Pathogenic/Likely pathogenic	germline
TP53	17	7578403	7578403	C	A	TCGA-FG-A4MT-01A-11D-A26M-08	LGG		17	7578403	7578403	C	A	NM_000546.6(TP53):c.527G>T (p.Cys176Phe)	Likely pathogenic	germline/somatic
TP53	17	7578412	7578412	A	G	TCGA-FG-A4MT-01A-11D-A26M-08	LGG		17	7578412	7578412	A	G	NM_000546.6(TP53):c.518T>C (p.Val173Ala)	Pathogenic/Likely pathogenic	germline/somatic
TP53	17	7578403	7578403	C	T	TCGA-FG-A4MY-01A-11D-A26M-08	LGG		17	7578403	7578403	C	T	NM_000546.6(TP53):c.527G>A (p.Cys176Tyr)	Pathogenic	germline/somatic
TP53	17	7577157	7577157	T	G	TCGA-FG-A60J-01A-11D-A289-08	LGG		17	7577157	7577157	T	G	NM_000546.6(TP53):c.783-2A>C	Pathogenic	germline
TP53	17	7577121	7577121	G	A	TCGA-FG-A711-01A-21D-A33T-08	LGG		17	7577121	7577121	G	A	NM_000546.6(TP53):c.817C>T (p.Arg273Cys)	Pathogenic/Likely pathogenic	germline/somatic
TP53	17	7577094	7577094	G	A	TCGA-FI-A2D0-01A-11D-A17D-09	UCEC		17	7577094	7577094	G	A	NM_000546.6(TP53):c.844C>T (p.Arg282Trp)	Pathogenic/Likely pathogenic	germline/somatic
TP53	17	7577121	7577121	G	A	TCGA-FI-A2D0-01A-11D-A17D-09	UCEC		17	7577121	7577121	G	A	NM_000546.6(TP53):c.817C>T (p.Arg273Cys)	Pathogenic/Likely pathogenic	germline/somatic
TP53	17	7578263	7578263	G	A	TCGA-FI-A2EU-01A-11D-A17D-09	UCEC		17	7578263	7578263	G	A	NM_000546.6(TP53):c.586C>T (p.Arg196Ter)	Pathogenic	germline/somatic
TP53	17	7578492	7578492	C	T	TCGA-FI-A2EW-01A-11D-A17D-09	UCEC		17	7578492	7578492	C	T	NM_000546.6(TP53):c.438G>A (p.Trp146Ter)	Pathogenic	germline/somatic
TP53	17	7577539	7577539	G	A	TCGA-FI-A2EX-01A-11D-A17D-09	UCEC		17	7577539	7577539	G	A	NM_000546.6(TP53):c.742C>T (p.Arg248Trp)	Pathogenic	germline/somatic
TP53	17	7577559	7577559	G	C	TCGA-FI-A2EY-01A-12D-A18P-09	UCEC		17	7577559	7577559	G	C	NM_000546.6(TP53):c.722C>G (p.Ser241Cys)	Likely pathogenic	germline/somatic
TP53	17	7577559	7577559	G	A	TCGA-FI-A2F8-01A-12D-A17D-09	UCEC		17	7577559	7577559	G	A	NM_000546.6(TP53):c.722C>T (p.Ser241Phe)	Likely pathogenic	germline/somatic
TP53	17	7578395	7578395	G	A	TCGA-FI-A3PV-01A-11D-A228-09	UCEC		17	7578395	7578395	G	A	NM_000546.6(TP53):c.535C>T (p.His179Tyr)	Pathogenic/Likely pathogenic	germline/somatic
TP53	17	7577121	7577121	G	A	TCGA-FI-A3PX-01A-11D-A228-09	UCEC		17	7577121	7577121	G	A	NM_000546.6(TP53):c.817C>T (p.Arg273Cys)	Pathogenic/Likely pathogenic	germline/somatic
TP53	17	7577085	7577085	C	T	TCGA-FJ-A3ZF-01A-11D-A23M-08	BLCA		17	7577085	7577085	C	T	NM_000546.6(TP53):c.853G>A (p.Glu285Lys)	Pathogenic/Likely pathogenic	germline/somatic
TP53	17	7578413	7578413	C	T	TCGA-FP-7735-01A-11D-2053-08	STAD		17	7578413	7578413	C	T	NM_000546.6(TP53):c.517G>A (p.Val173Met)	Pathogenic	germline/somatic
TP53	17	7578403	7578403	C	A	TCGA-FP-7829-01A-11D-2053-08	STAD		17	7578403	7578403	C	A	NM_000546.6(TP53):c.527G>T (p.Cys176Phe)	Likely pathogenic	germline/somatic
TP53	17	7578406	7578406	C	T	TCGA-FP-8099-01A-11D-2340-08	STAD		17	7578406	7578406	C	T	NM_000546.6(TP53):c.524G>A (p.Arg175His)	Pathogenic	germline/somatic
TP53	17	7577548	7577548	C	T	TCGA-FP-8631-01A-11D-2394-08	STAD		17	7577548	7577548	C	T	NM_000546.6(TP53):c.733G>A (p.Gly245Ser)	Pathogenic	germline/somatic
TP53	17	7577121	7577121	G	A	TCGA-FP-A4BE-01A-12D-A24D-08	STAD		17	7577121	7577121	G	A	NM_000546.6(TP53):c.817C>T (p.Arg273Cys)	Pathogenic/Likely pathogenic	germline/somatic
TP53	17	7578457	7578457	C	T	TCGA-FP-A4BE-01A-12D-A24D-08	STAD		17	7578457	7578457	C	T	NM_000546.6(TP53):c.473G>A (p.Arg158His)	Pathogenic/Likely pathogenic	germline
TP53	17	7577094	7577094	G	A	TCGA-FP-A4BF-01A-12D-A24D-08	STAD		17	7577094	7577094	G	A	NM_000546.6(TP53):c.844C>T (p.Arg282Trp)	Pathogenic/Likely pathogenic	germline/somatic
TP53	17	7574003	7574003	G	A	TCGA-FR-A7U9-06A-11D-A34U-08	SKCM		17	7574003	7574003	G	A	NM_000546.6(TP53):c.1024C>T (p.Arg342Ter)	Pathogenic	germline/somatic
TP53	17	7577559	7577559	G	A	TCGA-FS-A1ZW-06A-12D-A197-08	SKCM		17	7577559	7577559	G	A	NM_000546.6(TP53):c.722C>T (p.Ser241Phe)	Likely pathogenic	germline/somatic
TP53	17	7578271	7578271	T	C	TCGA-FV-A3I1-01A-11D-A22F-10	LIHC		17	7578271	7578271	T	C	NM_000546.6(TP53):c.578A>G (p.His193Arg)	Pathogenic/Likely pathogenic	germline/somatic
TP53	17	7577022	7577022	G	A	TCGA-FV-A3R2-01A-11D-A22F-10	LIHC		17	7577022	7577022	G	A	NM_000546.6(TP53):c.916C>T (p.Arg306Ter)	Pathogenic	germline/somatic
TP53	17	7577082	7577082	C	T	TCGA-FV-A4ZP-01A-12D-A25V-10	LIHC		17	7577082	7577082	C	T	NM_000546.6(TP53):c.856G>A (p.Glu286Lys)	Pathogenic	germline/somatic
TP53	17	7578475	7578475	G	A	TCGA-FW-A3R5-06A-11D-A23B-08	SKCM		17	7578475	7578475	G	A	NM_000546.6(TP53):c.455C>T (p.Pro152Leu)	Pathogenic	germline/somatic
TP53	17	7578208	7578208	T	C	TCGA-FX-A3TO-01A-11D-A228-09	SARC		17	7578208	7578208	T	C	NM_000546.6(TP53):c.641A>G (p.His214Arg)	Likely pathogenic	germline/somatic
TP53	17	7578475	7578475	G	A	TCGA-FZ-5921-01A-11D-1609-08	PAAD		17	7578475	7578475	G	A	NM_000546.6(TP53):c.455C>T (p.Pro152Leu)	Pathogenic	germline/somatic
TP53	17	7577538	7577538	C	T	TCGA-FZ-5924-01A-13D-1609-08	PAAD		17	7577538	7577538	C	T	NM_000546.6(TP53):c.743G>A (p.Arg248Gln)	Pathogenic	germline/somatic
TP53	17	7577120	7577120	C	T	TCGA-FZ-5926-01A-11D-1609-08	PAAD		17	7577120	7577120	C	T	NM_000546.6(TP53):c.818G>A (p.Arg273His)	Pathogenic	germline/somatic
TP53	17	7577548	7577548	C	T	TCGA-G2-A2EJ-01A-11D-A17V-08	BLCA		17	7577548	7577548	C	T	NM_000546.6(TP53):c.733G>A (p.Gly245Ser)	Pathogenic	germline/somatic
TP53	17	7573010	7573010	T	C	TCGA-G2-A2EL-01A-12D-A18F-08	BLCA		17	7573010	7573010	T	C	NM_000546.6(TP53):c.1101-2A>G	Pathogenic/Likely pathogenic	germline/somatic
TP53	17	7578406	7578406	C	T	TCGA-G2-A2ES-01A-11D-A17V-08	BLCA		17	7578406	7578406	C	T	NM_000546.6(TP53):c.524G>A (p.Arg175His)	Pathogenic	germline/somatic
TP53	17	7576855	7576855	G	A	TCGA-G2-A3IB-01A-11D-A20D-08	BLCA		17	7576855	7576855	G	A	NM_000546.6(TP53):c.991C>T (p.Gln331Ter)	Pathogenic	germline
TP53	17	7578403	7578403	C	A	TCGA-G2-A3IB-01A-11D-A20D-08	BLCA		17	7578403	7578403	C	A	NM_000546.6(TP53):c.527G>T (p.Cys176Phe)	Likely pathogenic	germline/somatic
TP53	17	7578382	7578382	G	C	TCGA-G2-AA3B-01A-11D-A391-08	BLCA		17	7578382	7578382	G	C	NM_000546.6(TP53):c.548C>G (p.Ser183Ter)	Pathogenic	germline/somatic
TP53	17	7578271	7578271	T	C	TCGA-G3-A25Z-01A-11D-A16V-10	LIHC		17	7578271	7578271	T	C	NM_000546.6(TP53):c.578A>G (p.His193Arg)	Pathogenic/Likely pathogenic	germline/somatic
TP53	17	7574035	7574035	T	C	TCGA-G3-A5SM-01A-12D-A28X-10	LIHC		17	7574035	7574035	T	C	NM_000546.6(TP53):c.994-2A>G	Likely pathogenic	germline
TP53	17	7577094	7577094	G	A	TCGA-G4-6294-01A-11D-1806-10	COAD		17	7577094	7577094	G	A	NM_000546.6(TP53):c.844C>T (p.Arg282Trp)	Pathogenic/Likely pathogenic	germline/somatic
TP53	17	7578406	7578406	C	T	TCGA-G4-6298-01A-11D-1719-10	COAD		17	7578406	7578406	C	T	NM_000546.6(TP53):c.524G>A (p.Arg175His)	Pathogenic	germline/somatic
TP53	17	7578263	7578263	G	A	TCGA-G4-6299-01A-11D-1771-10	COAD		17	7578263	7578263	G	A	NM_000546.6(TP53):c.586C>T (p.Arg196Ter)	Pathogenic	germline/somatic
TP53	17	7578212	7578212	G	A	TCGA-G4-6303-01A-11D-1771-10	COAD		17	7578212	7578212	G	A	NM_000546.6(TP53):c.637C>T (p.Arg213Ter)	Pathogenic	germline/somatic
TP53	17	7578406	7578406	C	T	TCGA-G4-6306-01A-11D-1771-10	COAD		17	7578406	7578406	C	T	NM_000546.6(TP53):c.524G>A (p.Arg175His)	Pathogenic	germline/somatic
TP53	17	7577506	7577506	C	A	TCGA-G4-6307-01A-11D-1719-10	COAD		17	7577506	7577506	C	A	NM_000546.6(TP53):c.775G>T (p.Asp259Tyr)	Likely pathogenic	somatic
TP53	17	7578406	7578406	C	T	TCGA-G4-6310-01A-11D-1719-10	COAD		17	7578406	7578406	C	T	NM_000546.6(TP53):c.524G>A (p.Arg175His)	Pathogenic	germline/somatic
TP53	17	7578212	7578212	G	A	TCGA-G4-6314-01A-11D-1719-10	COAD		17	7578212	7578212	G	A	NM_000546.6(TP53):c.637C>T (p.Arg213Ter)	Pathogenic	germline/somatic
TP53	17	7577539	7577539	G	A	TCGA-G4-6315-01A-11D-1719-10	COAD		17	7577539	7577539	G	A	NM_000546.6(TP53):c.742C>T (p.Arg248Trp)	Pathogenic	germline/somatic
TP53	17	7577538	7577538	C	T	TCGA-G4-6317-01A-11D-1719-10	COAD		17	7577538	7577538	C	T	NM_000546.6(TP53):c.743G>A (p.Arg248Gln)	Pathogenic	germline/somatic
TP53	17	7577548	7577548	C	T	TCGA-G4-6320-01A-11D-1719-10	COAD		17	7577548	7577548	C	T	NM_000546.6(TP53):c.733G>A (p.Gly245Ser)	Pathogenic	germline/somatic
TP53	17	7578212	7578212	G	A	TCGA-G4-6586-01A-11D-1771-10	COAD		17	7578212	7578212	G	A	NM_000546.6(TP53):c.637C>T (p.Arg213Ter)	Pathogenic	germline/somatic
TP53	17	7578190	7578190	T	C	TCGA-G4-6625-01A-21D-1771-10	COAD		17	7578190	7578190	T	C	NM_000546.6(TP53):c.659A>G (p.Tyr220Cys)	Pathogenic	germline/somatic
TP53	17	7578406	7578406	C	T	TCGA-G4-6626-01A-11D-1771-10	COAD		17	7578406	7578406	C	T	NM_000546.6(TP53):c.524G>A (p.Arg175His)	Pathogenic	germline/somatic
TP53	17	7579536	7579536	C	A	TCGA-G5-6235-01A-11D-1733-10	READ		17	7579536	7579536	C	A	NM_000546.6(TP53):c.151G>T (p.Glu51Ter)	Pathogenic	germline
TP53	17	7578271	7578271	T	C	TCGA-G9-7510-01A-11D-2260-08	PRAD		17	7578271	7578271	T	C	NM_000546.6(TP53):c.578A>G (p.His193Arg)	Pathogenic/Likely pathogenic	germline/somatic
TP53	17	7577085	7577085	C	T	TCGA-G9-7521-01A-11D-2260-08	PRAD		17	7577085	7577085	C	T	NM_000546.6(TP53):c.853G>A (p.Glu285Lys)	Pathogenic/Likely pathogenic	germline/somatic
TP53	17	7578272	7578272	G	A	TCGA-GC-A3OO-01A-11D-A22Z-08	BLCA		17	7578272	7578272	G	A	NM_000546.6(TP53):c.577C>T (p.His193Tyr)	Pathogenic/Likely pathogenic	germline/somatic
TP53	17	7577082	7577082	C	A	TCGA-GC-A3WC-01A-31D-A22Z-08	BLCA		17	7577082	7577082	C	A	NM_000546.6(TP53):c.856G>T (p.Glu286Ter)	Pathogenic	germline/somatic
TP53	17	7578534	7578534	C	G	TCGA-GC-A3WC-01A-31D-A22Z-08	BLCA		17	7578534	7578534	C	G	NM_000546.6(TP53):c.396G>C (p.Lys132Asn)	Likely pathogenic	germline/somatic
TP53	17	7578457	7578457	C	T	TCGA-GC-A3YS-01A-11D-A23M-08	BLCA		17	7578457	7578457	C	T	NM_000546.6(TP53):c.473G>A (p.Arg158His)	Pathogenic/Likely pathogenic	germline
TP53	17	7577538	7577538	C	T	TCGA-GC-A6I1-01A-12D-A31L-08	BLCA		17	7577538	7577538	C	T	NM_000546.6(TP53):c.743G>A (p.Arg248Gln)	Pathogenic	germline/somatic
TP53	17	7578457	7578457	C	T	TCGA-GC-A6I3-01A-11D-A31L-08	BLCA		17	7578457	7578457	C	T	NM_000546.6(TP53):c.473G>A (p.Arg158His)	Pathogenic/Likely pathogenic	germline
TP53	17	7577539	7577539	G	A	TCGA-GD-A2C5-01A-12D-A17V-08	BLCA		17	7577539	7577539	G	A	NM_000546.6(TP53):c.742C>T (p.Arg248Trp)	Pathogenic	germline/somatic
TP53	17	7577538	7577538	C	T	TCGA-GD-A3OS-01A-12D-A21Z-08	BLCA		17	7577538	7577538	C	T	NM_000546.6(TP53):c.743G>A (p.Arg248Gln)	Pathogenic	germline/somatic
TP53	17	7578508	7578508	C	T	TCGA-GD-A6C6-01A-21D-A31L-08	BLCA		17	7578508	7578508	C	T	NM_000546.6(TP53):c.422G>A (p.Cys141Tyr)	Pathogenic	germline/somatic
TP53	17	7577115	7577115	A	G	TCGA-GJ-A3OU-01A-31D-A382-10	LIHC		17	7577115	7577115	A	G	NM_000546.6(TP53):c.823T>C (p.Cys275Arg)	Likely pathogenic	germline/somatic
TP53	17	7577058	7577058	C	A	TCGA-GM-A2DB-01A-31D-A19Y-09	BRCA		17	7577058	7577058	C	A	NM_000546.6(TP53):c.880G>T (p.Glu294Ter)	Pathogenic	germline/somatic
TP53	17	7578406	7578406	C	T	TCGA-GM-A2DD-01A-11D-A17W-09	BRCA		17	7578406	7578406	C	T	NM_000546.6(TP53):c.524G>A (p.Arg175His)	Pathogenic	germline/somatic
TP53	17	7577610	7577610	T	C	TCGA-GM-A2DF-01A-11D-A17W-09	BRCA		17	7577610	7577610	T	C	NM_000546.6(TP53):c.673-2A>G	Pathogenic	germline/somatic
TP53	17	7576855	7576855	G	A	TCGA-GM-A2DH-01A-11D-A17W-09	BRCA		17	7576855	7576855	G	A	NM_000546.6(TP53):c.991C>T (p.Gln331Ter)	Pathogenic	germline
TP53	17	7576897	7576897	G	A	TCGA-GN-A26C-01A-11D-A19A-08	SKCM		17	7576897	7576897	G	A	NM_000546.6(TP53):c.949C>T (p.Gln317Ter)	Pathogenic/Likely pathogenic	germline
TP53	17	7574035	7574035	T	C	TCGA-GR-A4D4-01A-11D-A31X-10	DLBC		17	7574035	7574035	T	C	NM_000546.6(TP53):c.994-2A>G	Likely pathogenic	germline
TP53	17	7577586	7577586	A	G	TCGA-GS-A9TY-01A-11D-A38X-10	DLBC		17	7577586	7577586	A	G	NM_000546.6(TP53):c.695T>C (p.Ile232Thr)	Likely pathogenic	germline
TP53	17	7577550	7577550	C	T	TCGA-GU-A42P-01A-11D-A23U-08	BLCA		17	7577550	7577550	C	T	NM_000546.6(TP53):c.731G>A (p.Gly244Asp)	Pathogenic/Likely pathogenic	germline/somatic
TP53	17	7576852	7576852	C	T	TCGA-GU-A42Q-01A-11D-A23U-08	BLCA		17	7576852	7576852	C	T	NM_000546.6(TP53):c.993+1G>A	Pathogenic	germline/somatic
TP53	17	7578392	7578392	C	A	TCGA-GU-A766-01A-11D-A32B-08	BLCA		17	7578392	7578392	C	A	NM_000546.6(TP53):c.538G>T (p.Glu180Ter)	Pathogenic	somatic
TP53	17	7577538	7577538	C	T	TCGA-GU-AATO-01A-11D-A391-08	BLCA		17	7577538	7577538	C	T	NM_000546.6(TP53):c.743G>A (p.Arg248Gln)	Pathogenic	germline/somatic
TP53	17	7577538	7577538	C	T	TCGA-GV-A3JX-01A-11D-A20D-08	BLCA		17	7577538	7577538	C	T	NM_000546.6(TP53):c.743G>A (p.Arg248Gln)	Pathogenic	germline/somatic
TP53	17	7578275	7578275	G	A	TCGA-GV-A3JZ-01A-11D-A21A-08	BLCA		17	7578275	7578275	G	A	NM_000546.6(TP53):c.574C>T (p.Gln192Ter)	Pathogenic	germline
TP53	17	7577538	7577538	C	T	TCGA-GV-A3QH-01A-11D-A21Z-08	BLCA		17	7577538	7577538	C	T	NM_000546.6(TP53):c.743G>A (p.Arg248Gln)	Pathogenic	germline/somatic
TP53	17	7577084	7577084	T	A	TCGA-GV-A40G-01A-11D-A23M-08	BLCA		17	7577084	7577084	T	A	NM_000546.6(TP53):c.854A>T (p.Glu285Val)	Pathogenic	germline
TP53	17	7577094	7577094	G	A	TCGA-GV-A40G-01A-11D-A23M-08	BLCA		17	7577094	7577094	G	A	NM_000546.6(TP53):c.844C>T (p.Arg282Trp)	Pathogenic/Likely pathogenic	germline/somatic
TP53	17	7577610	7577610	T	C	TCGA-H5-A2HR-01A-11D-A17W-09	UCEC		17	7577610	7577610	T	C	NM_000546.6(TP53):c.673-2A>G	Pathogenic	germline/somatic
TP53	17	7577568	7577568	C	T	TCGA-H6-8124-01A-11D-2396-08	PAAD		17	7577568	7577568	C	T	NM_000546.6(TP53):c.713G>A (p.Cys238Tyr)	Pathogenic/Likely pathogenic	germline/somatic
TP53	17	7577094	7577094	G	C	TCGA-H6-A45N-01A-11D-A26I-08	PAAD		17	7577094	7577094	G	C	NM_000546.6(TP53):c.844C>G (p.Arg282Gly)	Pathogenic	germline/somatic
TP53	17	7578442	7578442	T	C	TCGA-H7-8501-01A-11D-2394-08	HNSC		17	7578442	7578442	T	C	NM_000546.6(TP53):c.488A>G (p.Tyr163Cys)	Pathogenic	germline/somatic
TP53	17	7578263	7578263	G	A	TCGA-H7-A6C4-01A-11D-A30E-08	HNSC		17	7578263	7578263	G	A	NM_000546.6(TP53):c.586C>T (p.Arg196Ter)	Pathogenic	germline/somatic
[truncated: 1,166 more rows]
