# Supplementary material for: The BRCAness Landscape of Cancer
Source: Cells. 2022 Dec 1;11(23):3877. doi: 10.3390/cells11233877 (PMC9738094; doi:10.3390/cells11233877)
Supplement: Supplementary file 1 [file cells-11-03877-s001.zip › Table S5.xlsx]

## Sheet: Sheet1
Table S5. Frequencies of homozygotic deletion in BRCAness genes across 33 cancer types
Gene	Cancer type																																	Total
	PRAD	DLBC	SARC	CESC	BLCA	OV	MESO	SKCM	LUSC	BRCA	LUAD	KIRC	STAD	ESCA	UVM	TGCT	ACC	COAD	LIHC	HNSC	UCEC	LGG	GBM	UCS	LAML	READ	KIRP	THYM	PAAD	THCA	PCPG	KICH	CHOL
PTEN	0.193089	0.0625	0.0622568	0.0508475	0.0465686	0.0457746	0.0229885	0.0708447	0.0978044	0.0518999	0.00968992	0.0094697	0.0498866	0.0380435	0	0.00746269	0	0.0378619	0.0378378	0.0344828	0.038961	0.0117188	0.0977312	0.0178571	0.0104712	0.0121951	0.00347222	0	0.00543478	0.01002	0.00617284	0.0151515	0	1.1585
WRN	0.0995935	0	0.0116732	0.020339	0.0539216	0.0440141	0	0.0190736	0.0379242	0.0444856	0.0484496	0.0132576	0.0113379	0.0271739	0.025	0.00746269	0.0111111	0.0445434	0.0594595	0.0210728	0.0241187	0	0	0.0357143	0	0.0426829	0.00347222	0	0.00543478	0	0	0	0	0.711316
TP53	0.0752033	0.0208333	0.11284	0.00338983	0.0269608	0.00352113	0	0.00817439	0.00598802	0.0139018	0.0135659	0.00378788	0.0181406	0.0108696	0	0	0.0111111	0.0178174	0.0243243	0.00957854	0.00371058	0.00390625	0.0104712	0	0.0104712	0.0182927	0.00347222	0.0162602	0.0108696	0.00200401	0.0123457	0	0.0277778	0.49959
BAP1	0.0101626	0.0416667	0.0194553	0.0305085	0.0220588	0.00704225	0.126437	0	0.00998004	0.00648749	0.00387597	0.102273	0.0181406	0.0163043	0	0	0	0.00445434	0.0027027	0.00957854	0.00185529	0.015625	0	0	0	0.00609756	0.00347222	0	0.00543478	0	0	0	0	0.463612
CHEK1	0.0162602	0.0208333	0.0350195	0.0474576	0.00980392	0.00704225	0	0.0354223	0.00998004	0.0148285	0.0116279	0.00378788	0.00226757	0.0163043	0.0375	0.104478	0	0	0.0027027	0.0114943	0.0111317	0	0	0.0178571	0	0	0.0104167	0	0	0	0	0	0	0.426215
FANCA	0.0813008	0	0.0116732	0.0135593	0.00980392	0.0334507	0.0114943	0.00817439	0.00199601	0.0287303	0.0271318	0	0.0204082	0	0.025	0.00746269	0	0.00445434	0.00810811	0.00383142	0.0111317	0.00195312	0.0034904	0.0178571	0.0104712	0.00609756	0.00694444	0.00813008	0	0.00601202	0.00617284	0	0	0.37484
KMT2A	0.0182927	0.0208333	0.0311284	0.040678	0.00490196	0.00352113	0	0.0299728	0.00798403	0.00834106	0.00775194	0.00189394	0.00226757	0.0163043	0.0375	0.0522388	0	0	0.0027027	0.01341	0.00556586	0	0.0017452	0.0178571	0.0157068	0	0.0138889	0.00813008	0	0	0	0	0	0.362617
ATM	0.0223577	0.0208333	0.0272374	0.0440678	0.00980392	0.0105634	0	0.0299728	0.00598802	0.0148285	0.0116279	0.00189394	0.0181406	0.0163043	0.0125	0.0373134	0	0.00668151	0.0027027	0.01341	0.00927644	0	0	0.0178571	0	0.00609756	0.0173611	0	0	0	0	0	0	0.356819
RAD51	0.0182927	0.0833333	0	0.00677966	0.00490196	0.028169	0.045977	0.0190736	0.00399202	0.00834106	0.0251938	0.00189394	0.00226757	0.00543478	0	0	0.0111111	0.0178174	0	0	0.00742115	0.0078125	0.0052356	0.0178571	0	0.0121951	0.00694444	0	0	0	0	0	0	0.340045
BRCA2	0.0650407	0.0625	0.0272374	0.0101695	0.0269608	0.0123239	0.0114943	0	0.00798403	0.0176089	0.0116279	0.00378788	0.00453515	0	0	0	0.0111111	0.00222717	0.00810811	0.00766284	0.00185529	0.0175781	0.0069808	0	0	0	0	0	0	0.00400802	0	0	0	0.320802
TP53BP1	0.0182927	0.0833333	0	0.00677966	0.00490196	0.0211268	0.045977	0.0190736	0.00798403	0.00463392	0.0251938	0.00189394	0.00453515	0	0	0	0.0111111	0.0178174	0	0	0.00556586	0.0078125	0.0034904	0	0	0.00609756	0.00347222	0	0	0	0	0	0	0.299093
PAXIP1	0.00813008	0	0.0194553	0.00338983	0.00980392	0.00704225	0	0.0027248	0.00998004	0.00185357	0.00193798	0	0.0136054	0.0434783	0	0	0.0222222	0	0.00540541	0.0114943	0.00371058	0	0.0017452	0.0178571	0.0314136	0	0	0	0	0	0	0	0	0.21525
RAD51B	0.0101626	0	0.0272374	0.00677966	0.0392157	0.0105634	0	0.0027248	0.00998004	0.00834106	0.00193798	0.00568182	0.015873	0.00543478	0	0	0	0.00222717	0.0027027	0.00191571	0.00927644	0.00976562	0.0069808	0	0	0.0121951	0.00347222	0.00813008	0	0	0	0	0	0.200598
FANCD2	0.0284553	0	0.0077821	0.00677966	0	0	0	0.0027248	0.00199601	0.00278035	0.00193798	0.109848	0.00453515	0.0163043	0	0	0	0	0	0.00383142	0	0.00195312	0.0017452	0	0	0	0	0.00813008	0	0	0	0	0	0.198804
MRE11A	0.00813008	0.0208333	0.0194553	0.020339	0	0.00704225	0	0.013624	0.00998004	0.00741427	0.00193798	0.00189394	0.00680272	0.00543478	0	0.0298507	0	0.00222717	0.00540541	0.0153257	0.00371058	0	0	0	0	0	0.0104167	0	0	0	0	0	0	0.189824
CHEK2	0.0223577	0	0.00389105	0	0.00245098	0.0105634	0.0114943	0.00817439	0.00199601	0.000926784	0.00193798	0	0.00907029	0.00543478	0	0.00746269	0.0444444	0.00668151	0.00810811	0	0.00371058	0	0	0	0	0	0.00347222	0.0325203	0	0.00200401	0	0	0	0.186702
RAD50	0.0121951	0.0208333	0.0077821	0.00338983	0.00980392	0.00704225	0.0114943	0.00544959	0.00598802	0.00185357	0.00581395	0	0.0136054	0.00543478	0.0125	0	0	0.00668151	0	0.00574713	0.00185529	0.00585938	0.0034904	0	0.0314136	0	0	0	0.00543478	0	0	0	0	0.183668
BARD1	0.00406504	0	0.0116732	0.0305085	0.0171569	0.00176056	0.0229885	0	0.00798403	0.00463392	0	0.00568182	0.00226757	0.0108696	0.0125	0	0	0	0	0.0172414	0.00185529	0.00390625	0.0017452	0	0	0	0.00694444	0	0	0.00200401	0	0	0	0.165786
BRCA1	0.0203252	0.0416667	0	0	0	0.0176056	0	0	0.00399202	0.00741427	0	0	0.00680272	0	0.025	0	0.0222222	0.00222717	0.0027027	0	0.00185529	0.00390625	0.0017452	0	0	0	0	0	0	0	0	0	0	0.157465
RAD51D	0.00813008	0	0.0116732	0.00338983	0.00245098	0.0176056	0	0	0.00798403	0.00370714	0.00193798	0	0	0.0108696	0.0125	0	0.0222222	0.00222717	0.0027027	0	0.00556586	0.00195312	0.0017452	0	0.0052356	0	0	0	0.00543478	0	0	0	0	0.127335
PARP1	0.0243902	0.0416667	0.0116732	0.00677966	0.00245098	0	0	0	0	0	0	0	0	0	0.0125	0.00746269	0	0	0.0027027	0	0.00185529	0.00195312	0	0	0	0	0	0.00813008	0.00543478	0	0	0	0	0.126999
WEE1	0	0	0.00389105	0	0.0122549	0.00176056	0	0.00544959	0.00998004	0.00463392	0.0116279	0	0.00453515	0	0	0	0.0111111	0	0	0.00191571	0.00371058	0.0371094	0.0069808	0	0.0052356	0	0	0	0	0	0.00617284	0	0	0.126369
FANCC	0.00406504	0.0208333	0	0.00338983	0.00980392	0.00528169	0	0.0027248	0.00798403	0.00278035	0.0135659	0	0.00680272	0	0	0	0	0	0.0027027	0.00191571	0.00927644	0.00195312	0	0	0.0104712	0	0.00347222	0	0.00543478	0.00200401	0	0	0	0.114462
RAD52	0.00609756	0	0.0077821	0.00338983	0.00490196	0.00176056	0	0	0.00598802	0.00278035	0.00968992	0.00189394	0.00453515	0	0.0125	0	0	0	0.0027027	0	0.00556586	0.00195312	0.0017452	0.0178571	0	0.00609756	0.00694444	0	0	0.00200401	0	0	0	0.106189
CDK12	0.00813008	0	0	0	0	0.0123239	0	0	0.00199601	0.00185357	0	0	0	0	0.025	0	0.0333333	0	0.00540541	0	0.00185529	0	0.0017452	0	0.0052356	0	0	0	0	0	0	0	0	0.0968784
ERCC1	0.00813008	0	0.0077821	0	0	0.0123239	0	0	0.00199601	0.00185357	0	0.00189394	0.00453515	0.00543478	0	0	0	0.00222717	0	0	0.00371058	0.0351562	0.0034904	0	0	0	0.00347222	0	0	0	0	0	0	0.0920062
CHD4	0.0101626	0	0.00389105	0.00338983	0.00490196	0	0	0.0027248	0	0.00185357	0.0135659	0	0.00453515	0.00543478	0.0125	0	0	0	0	0	0	0	0	0	0	0	0.00347222	0	0	0	0	0	0	0.0664319
NBN	0.00609756	0.0208333	0.00389105	0	0.00245098	0.00352113	0	0.0027248	0	0	0	0	0.00226757	0	0	0	0	0	0.0027027	0	0.00185529	0	0	0	0	0	0.00347222	0	0	0	0	0.0151515	0	0.0649681
PLK1	0.00203252	0.0208333	0	0	0	0.00176056	0	0.0027248	0	0	0.00193798	0	0.00680272	0	0	0	0	0.00445434	0	0.00191571	0	0	0.0034904	0	0	0	0	0	0	0	0	0	0	0.0459524
FANCF	0	0	0.00389105	0	0.00980392	0.00352113	0	0	0	0.000926784	0.00387597	0	0	0	0	0	0	0.00222717	0	0.00191571	0.00185529	0.0078125	0.0017452	0	0.0052356	0	0	0	0	0	0	0	0	0.0428103
ATR	0.00406504	0	0	0	0	0	0.0114943	0.0027248	0.00399202	0	0.00193798	0.00189394	0	0	0	0	0	0	0	0	0	0	0.0069808	0	0	0	0	0	0	0.00200401	0	0	0	0.0350928
RAD51C	0.00609756	0	0.00389105	0.00338983	0.00245098	0.00352113	0	0.0027248	0.00199601	0.00185357	0	0	0.00226757	0	0	0	0	0	0	0	0	0	0	0	0	0	0	0	0	0	0	0	0	0.0281925
FANCE	0.0101626	0	0	0	0.00245098	0	0	0	0.00199601	0	0	0	0.00453515	0	0	0	0	0	0.0027027	0	0	0	0	0	0	0	0.00347222	0	0	0	0	0	0	0.0253197
PALB2	0.00203252	0	0	0	0	0.00176056	0	0.0027248	0	0	0.00193798	0	0.00453515	0	0	0	0	0.00668151	0	0.00191571	0	0	0.0034904	0	0	0	0	0	0	0	0	0	0	0.0250786
BRIP1	0	0	0.00389105	0.00677966	0	0.00176056	0	0	0	0.000926784	0	0	0	0.00543478	0	0	0	0	0	0.00191571	0.00185529	0.00195312	0	0	0	0	0	0	0	0	0	0	0	0.024517
BLM	0	0	0	0	0.00735294	0.00352113	0	0	0	0.000926784	0.00193798	0	0.00226757	0	0	0	0	0.00222717	0	0	0	0.00195312	0.0017452	0	0	0	0	0	0	0	0	0	0	0.0219319
SAMHD1	0.0101626	0	0	0	0	0	0	0	0	0	0.00193798	0	0	0	0	0	0	0.00222717	0	0.00191571	0	0	0	0	0.0052356	0	0	0	0	0	0	0	0	0.0214791
FANCI	0	0	0.00389105	0	0.00490196	0.00352113	0	0	0	0.00185357	0	0	0	0	0	0	0	0.00222717	0	0	0	0	0	0	0	0	0.00347222	0	0	0	0	0	0	0.0198671
MYC	0.00406504	0	0.00389105	0	0	0	0	0	0	0	0	0	0	0	0	0	0	0	0.0027027	0	0	0	0	0	0	0	0	0	0	0.00200401	0	0	0	0.0126628
AURKA	0.00406504	0	0	0	0	0	0	0	0.00199601	0	0	0	0	0	0	0	0	0	0	0	0.00185529	0	0	0	0	0	0	0	0	0	0	0	0	0.00791634
Total	0.849593	0.604167	0.505837	0.376271	0.365196	0.352113	0.321839	0.299728	0.295409	0.275255	0.275194	0.272727	0.272109	0.266304	0.2625	0.261194	0.211111	0.198218	0.197297	0.193487	0.185529	0.183594	0.179756	0.178571	0.146597	0.128049	0.125	0.0894309	0.048913	0.0340681	0.0308642	0.030303	0.0277778	8.044
