# Supplementary material for: The BRCAness Landscape of Cancer
Source: Cells. 2022 Dec 1;11(23):3877. doi: 10.3390/cells11233877 (PMC9738094; doi:10.3390/cells11233877)
Supplement: Supplementary file 1 [file cells-11-03877-s001.zip › Table S6.xlsx]

## Sheet: Sheet 1
Table S6. Promoter methylation in BRCAness genes across 33 cancer types
Gene																	Cancer Type																	Total
	LAML	KIRP	THCA	LGG	COAD	LIHC	CHOL	KIRC	LUAD	THYM	UCEC	ACC	READ	MESO	BRCA	PRAD	SKCM	STAD	HNSC	CESC	PAAD	OV	SARC	GBM	ESCA	LUSC	BLCA	KICH	UVM	DLBC	PCPG	UCS	TGCT
SAMHD1	0.956395	0.950958	0.943459	0.94104	0.936312	0.929434	0.924959	0.951877	0.907417	0.94283	0.944488	0.931915	0.939452	0.9392	0.936285	0.946318	0.913158	0.922106	0.926543	0.935128	0.931263	0.940531	0.917446	0.944451	0.912368	0.916939	0.906653	0.933787	0.941355	0.907397	0.907245	0.919496	0.749748	30.548
PAXIP1	0.924819	0.919077	0.922491	0.916901	0.921321	0.903597	0.831083	0.921987	0.881139	0.898293	0.917702	0.923517	0.928611	0.888524	0.913808	0.902623	0.921128	0.900924	0.916852	0.901171	0.88742	0.909805	0.888612	0.922125	0.899367	0.91689	0.90797	0.923256	0.895961	0.908214	0.906991	0.870394	0.710999	29.7036
FANCA	0.956452	0.940131	0.934887	0.916586	0.902327	0.901452	0.931469	0.920972	0.869238	0.926702	0.899689	0.929484	0.909344	0.9177	0.911505	0.890139	0.89841	0.885433	0.902912	0.903336	0.912483	0.875028	0.913906	0.901259	0.887968	0.88287	0.890664	0.935975	0.881289	0.865461	0.878919	0.863169	0.650945	29.5881
NBN	0.930828	0.903644	0.926329	0.898945	0.920631	0.890358	0.861046	0.919931	0.882066	0.879915	0.917448	0.905301	0.926159	0.856529	0.77235	0.881193	0.915858	0.889496	0.918878	0.8983	0.871405	0.866439	0.866651	0.90068	0.890952	0.91037	0.895937	0.924541	0.89221	0.886176	0.866855	0.853351	0.702259	29.223
BARD1	0.945216	0.897776	0.9385	0.913419	0.890972	0.888862	0.854611	0.862987	0.876075	0.907429	0.899628	0.909053	0.872918	0.87789	0.914334	0.911381	0.891126	0.881581	0.91158	0.890661	0.884482	0.899801	0.849797	0.90321	0.876086	0.893038	0.889804	0.932716	0.856273	0.880873	0.668505	0.824664	0.715181	29.0104
BRIP1	0.90952	0.901789	0.905812	0.884053	0.902907	0.875013	0.890197	0.901371	0.873235	0.867838	0.892312	0.861902	0.901531	0.865841	0.895681	0.887702	0.899974	0.878292	0.901557	0.885637	0.860887	0.858031	0.864961	0.89273	0.881221	0.89318	0.887763	0.881043	0.879909	0.837896	0.899089	0.873903	0.704173	28.9969
RAD52	0.871861	0.901009	0.865808	0.900614	0.88975	0.894525	0.892506	0.891246	0.841396	0.755835	0.892992	0.915743	0.89285	0.879647	0.905346	0.90673	0.886399	0.858307	0.87748	0.893148	0.861856	0.885993	0.876051	0.860885	0.872842	0.880028	0.887278	0.86728	0.907665	0.865154	0.873755	0.81393	0.530022	28.5959
PARP1	0.915297	0.907331	0.906618	0.916652	0.860396	0.855622	0.854085	0.895149	0.814117	0.908228	0.859324	0.884671	0.858848	0.889167	0.876124	0.888909	0.837591	0.855054	0.842612	0.84199	0.870531	0.859505	0.880422	0.899489	0.834543	0.834997	0.820688	0.898755	0.887364	0.621884	0.879813	0.804073	0.688881	28.2487
FANCC	0.945973	0.925408	0.91799	0.92306	0.866761	0.915147	0.925661	0.907037	0.826061	0.894776	0.891315	0.924294	0.854486	0.919477	0.683694	0.720766	0.912005	0.869583	0.689746	0.654234	0.861201	0.933582	0.90253	0.914316	0.740071	0.673911	0.760468	0.608292	0.93163	0.91193	0.877268	0.786446	0.577605	27.6467
RAD51D	0.872236	0.871497	0.916368	0.802186	0.83366	0.85193	0.865268	0.810508	0.8263	0.919052	0.799155	0.835388	0.841373	0.855387	0.895317	0.864095	0.75632	0.769034	0.833805	0.837458	0.762239	0.854899	0.847338	0.719656	0.798743	0.816734	0.810764	0.708705	0.689178	0.807742	0.581929	0.757255	0.593065	26.6046
AURKA	0.924434	0.815351	0.84095	0.900238	0.742122	0.826396	0.780039	0.869592	0.711976	0.856853	0.794969	0.859869	0.75585	0.864703	0.801604	0.849028	0.849304	0.776229	0.753785	0.744965	0.778114	0.79778	0.865005	0.850637	0.759568	0.795937	0.744349	0.833354	0.821491	0.831443	0.812497	0.763606	0.628013	26.6001
BRCA1	0.880512	0.864093	0.868607	0.818255	0.808752	0.768939	0.7941	0.839507	0.801749	0.861259	0.735305	0.87684	0.792376	0.786081	0.780319	0.781555	0.819719	0.748407	0.827027	0.804804	0.782332	0.812486	0.792051	0.702586	0.787277	0.793903	0.793079	0.721956	0.85284	0.63591	0.724234	0.730751	0.525153	25.9128
MRE11A	0.852215	0.719454	0.579167	0.712237	0.728741	0.720164	0.620077	0.67535	0.720758	0.778947	0.763442	0.613621	0.71666	0.654653	0.693352	0.607546	0.717266	0.746526	0.760433	0.775009	0.689	0.819938	0.690166	0.685774	0.705091	0.711681	0.674186	0.59174	0.620686	0.767453	0.552514	0.610864	0.644337	22.919
TP53	0.824103	0.760869	0.733785	0.3129	0.63746	0.684497	0.658139	0.654161	0.633601	0.710613	0.618231	0.501665	0.573517	0.670886	0.697565	0.699738	0.529716	0.616056	0.585189	0.5794	0.644338	0.333686	0.55494	0.340927	0.575192	0.568528	0.556983	0.410503	0.242318	0.525818	0.572902	0.508937	0.383039	18.9002
RAD51C	0.753694	0.631144	0.66177	0.681428	0.637722	0.646151	0.685404	0.654021	0.574073	0.705428	0.609291	0.40304	0.613208	0.560229	0.623583	0.54332	0.418981	0.543157	0.555981	0.526405	0.613347	0.565917	0.512013	0.551772	0.546494	0.498847	0.515654	0.654904	0.541755	0.404256	0.459689	0.395085	0.430585	18.7183
CHEK2	0.473977	0.399715	0.419628	0.375769	0.519207	0.357067	0.426834	0.39368	0.435407	0.456789	0.431573	0.422592	0.420496	0.43963	0.420639	0.434701	0.345323	0.466151	0.398227	0.436374	0.411178	0.36553	0.331853	0.355423	0.457697	0.384348	0.394555	0.413468	0.388001	0.370893	0.346192	0.321932	0.315585	13.3304
FANCE	0.21198	0.480109	0.401692	0.453659	0.203014	0.36555	0.422278	0.36998	0.276076	0.193243	0.264337	0.472398	0.185849	0.275263	0.259561	0.138424	0.341088	0.223894	0.295705	0.285636	0.196153	0.252724	0.224478	0.232339	0.239591	0.243354	0.230349	0.135776	0.321779	0.206634	0.203478	0.238795	0.204237	9.04942
BRCA2	0.0942723	0.141122	0.145922	0.379898	0.355579	0.283617	0.216956	0.177526	0.160752	0.124346	0.247353	0.223117	0.334568	0.11831	0.274115	0.361773	0.123598	0.230527	0.134632	0.161625	0.14032	0.170789	0.140436	0.26677	0.168931	0.125152	0.155585	0.204665	0.171886	0.079671	0.150655	0.146015	0.115793	6.32628
PLK1	0.0648471	0.0952439	0.0766782	0.116901	0.071101	0.129755	0.0828053	0.0688868	0.0883396	0.0766469	0.0681703	0.0701396	0.0643234	0.0724429	0.0638616	0.0750133	0.0649421	0.0676228	0.0672539	0.0670768	0.0749021	0.0758126	0.0608322	0.0708914	0.0636192	0.0684709	0.0692836	0.0832645	0.0752321	0.0699236	0.0848175	0.0717422	0.0722074	2.49305
CHEK1	0.0726229	0.0715648	0.068575	0.0698312	0.07458	0.0774243	0.0848792	0.069077	0.109051	0.0746306	0.0726969	0.0686084	0.0736283	0.0755447	0.0790158	0.0682327	0.074994	0.0704879	0.071813	0.0793048	0.0770277	0.0683022	0.0789186	0.0727013	0.0726808	0.0707419	0.0732463	0.0776361	0.0634343	0.072358	0.0784588	0.0669785	0.0793055	2.45835
CHD4	0.0563831	0.0664127	0.0958179	0.0739453	0.0663885	0.0677868	0.0809221	0.0638114	0.105315	0.0569143	0.0616128	0.0755439	0.0626393	0.0535704	0.0662138	0.0577943	0.064016	0.0669815	0.0642941	0.0651153	0.0605631	0.0474415	0.0659913	0.0697622	0.0604267	0.0576587	0.0607987	0.0754155	0.0509929	0.0591447	0.0598614	0.058136	0.054385	2.15206
ERCC1	0.083882	0.0562522	0.0572002	0.0657392	0.0653698	0.0582377	0.0623464	0.0578097	0.101194	0.0555677	0.0577405	0.0649276	0.0625985	0.0581105	0.0655845	0.0617928	0.0917926	0.0614984	0.0684242	0.0636001	0.0648907	0.0531113	0.0687727	0.0633819	0.0603648	0.0642954	0.061561	0.0590014	0.0518333	0.0842795	0.0551299	0.0647957	0.0541418	2.12523
FANCI	0.051719	0.0593288	0.0640974	0.0847966	0.0668604	0.060805	0.0677184	0.062352	0.0988456	0.0594017	0.0650329	0.0537108	0.0623951	0.0586477	0.063622	0.0582611	0.0623814	0.0614615	0.0658565	0.0630909	0.0586461	0.062454	0.0600202	0.0688309	0.059247	0.0602848	0.0590284	0.0737977	0.0611014	0.058798	0.0607484	0.0611659	0.0619742	2.09648
RAD51B	0.0418345	0.0509762	0.0523411	0.053463	0.058717	0.0541458	0.0621465	0.0566768	0.0861592	0.046815	0.0545205	0.0438256	0.0563184	0.0547727	0.0583886	0.0513162	0.0547794	0.051773	0.0536013	0.0548762	0.0538526	0.0524837	0.0567748	0.0576907	0.0516494	0.0515169	0.0523483	0.0580474	0.0471681	0.0524369	0.0542376	0.0516336	0.0461362	1.78342
ATR	0.0375147	0.0539108	0.0528162	0.051132	0.0577516	0.0515775	0.0606286	0.0518021	0.0811184	0.0514454	0.05785	0.0441938	0.0535256	0.0530144	0.0565826	0.0494663	0.0508295	0.0487419	0.05376	0.051483	0.0533489	0.0470944	0.0508567	0.0569121	0.049585	0.0493722	0.0516619	0.0576391	0.0507882	0.0503049	0.0558111	0.0514834	0.0462194	1.74022
WRN	0.0395406	0.0443289	0.0418904	0.0431703	0.0848354	0.0538459	0.0580154	0.0419974	0.0844049	0.0434815	0.0476515	0.0466622	0.0479622	0.0500566	0.0474487	0.0447099	0.0445526	0.083979	0.049196	0.0582843	0.0505858	0.0539302	0.0470463	0.043067	0.0684154	0.0443442	0.0462369	0.0426761	0.0455794	0.0579183	0.0445325	0.0473988	0.0404421	1.68819
MYC	0.0400905	0.0485014	0.0481915	0.0459759	0.0528528	0.0499865	0.0510278	0.0456037	0.0800298	0.0408143	0.0504652	0.0472176	0.0494869	0.0444164	0.0492014	0.0455228	0.0480303	0.0461477	0.0493743	0.0486908	0.0465453	0.0480166	0.0442166	0.0495598	0.0452718	0.0474648	0.0460864	0.0541236	0.0432057	0.0451568	0.0457181	0.0490338	0.043582	1.58961
FANCF	0.0309781	0.0380751	0.0396263	0.0417418	0.0467377	0.0402538	0.0427355	0.0419186	0.074398	0.0366827	0.062908	0.0361991	0.0418559	0.039173	0.0453074	0.0380335	0.0408837	0.0400113	0.0573047	0.0783263	0.0392309	0.037	0.0417711	0.0494224	0.0459442	0.0439154	0.0510647	0.0469123	0.0354452	0.0476337	0.0409955	0.0689167	0.0392564	1.50066
WEE1	0.0373401	0.0417586	0.0470436	0.0589897	0.0447574	0.0502931	0.048352	0.0400016	0.0740012	0.0384422	0.0414845	0.0461622	0.0443244	0.042862	0.0408414	0.0417604	0.0424508	0.0409441	0.0416922	0.0414994	0.0410299	0.040226	0.0392528	0.0442256	0.0383856	0.0423469	0.0389276	0.0478803	0.0439551	0.039178	0.0413703	0.0412868	0.0380369	1.4411
ATM	0.0335072	0.0399596	0.0386377	0.0391574	0.041878	0.044663	0.0513881	0.0381041	0.0660762	0.0401043	0.0413575	0.0434863	0.0408939	0.0460207	0.0457035	0.0402007	0.042978	0.0420483	0.0403747	0.0457683	0.0421638	0.0387876	0.0443554	0.040855	0.0424602	0.0402468	0.0415305	0.0420294	0.0365957	0.0395512	0.0412975	0.0440509	0.0415782	1.39781
RAD50	0.0356969	0.0377161	0.0364442	0.0398577	0.0385911	0.0387606	0.0462746	0.0344741	0.0703974	0.0371686	0.0386341	0.037931	0.0353435	0.0410598	0.0383303	0.0403358	0.0474945	0.0401026	0.0392693	0.0406307	0.0402035	0.0377386	0.0398835	0.0370327	0.042202	0.0391497	0.0394033	0.0401612	0.0366248	0.0375299	0.0416253	0.0403018	0.0420529	1.32842
PALB2	0.0408571	0.0389548	0.0404664	0.0414235	0.0409138	0.0379218	0.0419141	0.0380426	0.0733911	0.0362408	0.0378713	0.0402483	0.0383093	0.0379881	0.0389781	0.0356623	0.0381246	0.036968	0.0405888	0.0400944	0.0383056	0.0345443	0.036667	0.039582	0.0367091	0.0382505	0.0378051	0.0464527	0.0350833	0.0372147	0.0382486	0.0390249	0.0357694	1.30862
BLM	0.0354511	0.0372275	0.0384019	0.0370679	0.0418363	0.039175	0.0444659	0.0363844	0.0677449	0.0371037	0.0389313	0.0366262	0.0365721	0.0400786	0.0364555	0.0362736	0.0389297	0.0365672	0.0400874	0.0402492	0.0379795	0.040475	0.0360231	0.0381307	0.0370931	0.0372539	0.0376131	0.0455709	0.0381988	0.0364389	0.040177	0.0383146	0.0376502	1.29655
CDK12	0.0306507	0.0343467	0.0370987	0.0371052	0.0428868	0.0382635	0.0409756	0.0354753	0.0684068	0.0373466	0.0458073	0.0382452	0.0368954	0.0416426	0.0400229	0.0352271	0.0372966	0.0399583	0.0368238	0.0373861	0.0373633	0.0421873	0.0361353	0.0407996	0.0350907	0.035695	0.0356487	0.046953	0.0345295	0.036863	0.037631	0.0396695	0.0354898	1.28592
PTEN	0.0277582	0.0315012	0.0334565	0.0382989	0.0356058	0.0331321	0.0327709	0.0319811	0.0632554	0.0290011	0.0357459	0.0314956	0.0321648	0.0317834	0.0337342	0.0313189	0.194746	0.0314734	0.0337547	0.03362	0.0323569	0.0314656	0.0376324	0.0351405	0.030921	0.0326458	0.0316497	0.035938	0.034815	0.0307273	0.0334163	0.035395	0.0295441	1.27825
KMT2A	0.0315876	0.0361618	0.0360196	0.0348198	0.0396981	0.0395865	0.042742	0.0341286	0.0681995	0.0327542	0.039057	0.0362551	0.0369433	0.036706	0.0375457	0.0339093	0.036541	0.0368513	0.0379327	0.0388028	0.0367658	0.0346726	0.0341986	0.0352681	0.0366244	0.036053	0.0359122	0.0390166	0.0315238	0.0340881	0.035958	0.0383731	0.0337355	1.22843
BAP1	0.0223588	0.0271107	0.0278292	0.0286584	0.0313553	0.0304223	0.0549544	0.0262254	0.0547294	0.0283199	0.031531	0.0277963	0.0259971	0.0328101	0.0282778	0.0272622	0.0274759	0.0295862	0.029358	0.0298032	0.0304037	0.0251362	0.0277473	0.0259256	0.0302744	0.0291763	0.0284136	0.0263996	0.0279888	0.0305119	0.0288585	0.0347718	0.0268364	0.994306
RAD51	0.0256753	0.0275251	0.0286218	0.0297601	0.0304357	0.029097	0.0329592	0.0280244	0.0546205	0.0269624	0.028961	0.0274433	0.0277699	0.0288238	0.0275448	0.027515	0.028277	0.0271475	0.0293307	0.0289511	0.0284551	0.0287247	0.0263448	0.0288446	0.026981	0.0275844	0.0280968	0.0318357	0.0258528	0.0277763	0.0299036	0.0278191	0.0266796	0.960344
FANCD2	0.0228186	0.0255266	0.0253425	0.02568	0.0274148	0.0263665	0.0367023	0.0257541	0.0477187	0.0236275	0.0259278	0.0249644	0.0251727	0.0266952	0.0263275	0.0246626	0.0267672	0.0257277	0.0270262	0.0281897	0.026909	0.0241336	0.0247851	0.0248611	0.0268797	0.026469	0.0253514	0.0271883	0.0236572	0.0255617	0.0274812	0.0284872	0.0242207	0.884398
Total	15.107	14.893	14.816	14.705	14.618	14.61	14.561	14.545	14.529	14.498	14.383	14.336	14.273	14.225	14.244	14.14	14.135	14.047	14.03	13.99	13.93	13.926	13.877	13.838	13.795	13.684	13.674	13.639	13.617	13.288	13.139	13.081	10.779	301.688
